# Supplementary material for: Life evaluation, life satisfaction, and happiness: assessing inter-relations and 15 childhood and demographic factors across 22 Countries in the Global Flourishing Study
Source: Research Square preprint supplement (doi:10.21203/rs.3.rs-6420806/v1), 2025-05-13
Supplement: Supplementary file 1 [file e4ea8ceb478650ca1543dcb1.docx]

# Online Supplement

Contents

| Pages | Content |
| --- | --- |
| 2—2 | Notes, caveats, and interpretation tips |
| 3—8 | Tables S1a-g: Main table versions based on complete case analysis |
| 9—28 | Table S2a-g. Country specific results for Argentina |
| 29—52 | Table S3a-g. Country specific results for Australia |
| 53—72 | Table S4a-g. Country specific results for Brazil |
| 73—92 | Table S5a-g. Country specific results for Egypt |
| 93—112 | Table S6a-g. Country specific results for Germany |
| 113—136 | Table S7a-g. Country specific results for Hong Kong (S.A.R. of China) |
| 137—156 | Table S8a-g. Country specific results for India |
| 157—176 | Table S9a-g. Country specific results for Indonesia |
| 177—196 | Table S10a-g. Country specific results for Israel |
| 197—216 | Table S11a-g. Country specific results for Japan |
| 217—236 | Table S12a-g. Country specific results for Kenya |
| 237—256 | Table S13a-g. Country specific results for Mexico |
| 257—276 | Table S14a-g. Country specific results for Nigeria |
| 277—298 | Table S15a-g. Country specific results for the Philippines |
| 299—218 | Table S16a-g. Country specific results for Poland |
| 319—338 | Table S17a-g. Country specific results for South Africa |
| 339—358 | Table S18a-g. Country specific results for Spain |
| 359—378 | Table S19a-g. Country specific results for Sweden |
| 379—398 | Table S20a-g. Country specific results for Tanzania |
| 399—418 | Table S21a-g. Country specific results for Turkey |
| 419—438 | Table S22a-g. Country specific results for the United Kingdom |
| 439—458 | Table S23a-g. Country specific results for the United States |
| 459—465 | Tables S24a-c. Population weighted meta-analysis results |
| 466—467 | Table S25a-b. LE data in the GFS, GWP, and WHR |
| 469—469 | Table S26. Correlations between SWB and flourishing domains |
| 470—470 | Table S27. SWB World region estimates |
| 471—472 | Table S28a-b. GDP per capita and Gini Index data and correlations |
| 473—475 | Tables S29a-c. SWB and employment status across countries |
| 476—478 | Tables S30a-c. SWB and childhood health across countries |
| 479—481 | Figures 31a-f. Scatter plots for GDP per capita and Gini Index |
| 482—498 | Figures 32(1-102). Forest plots for demographic variation analyses |
| 499—512 | Figures 33(1-81). Forest plots for childhood predictor analyses |
| 513—515 | Figures 34a-c. Pairwise standardized mean differences in country means |

# Important Notes and Caveats

This online supplement to the Global Flourishing Study paper on life evaluation, life satisfaction, and happiness has several important caveats to interpretation for the demographic variation analyses and childhood predictor analyses.

For the demographic variation analyses, estimating the within country group means can be unstable when the group size is small (<1%) of the country sample size. In such cases, the uncertainty in the estimate leads to a multiple imputation adjusted degrees of freedom less than 1. This means there is not enough information to evaluate the uncertainty in the estimate. We flagged such cases with a “*”. Interval estimates for the mean of continuous outcomes (ranged 0-10) were based on a Wald-type confidence interval where items were treated as continuous which could rarely lead to intervals exceeding the bounds of the observed range of values; in such cases we have truncate the limits to be within the range of observed values, and such cases are marked with a “ǂ”.

For the childhood predictor analyses, analyses are based on data using a retrospective (recall) approach to obtain information about the respondents’ lives at age 12. Several the childhood characteristics such as relationship quality with parents, subjective financial status growing up, etc. are necessarily highly related. This led to multicollinearity issues so some effects may be unstable. Additionally, in rare instances the confidence interval of the effect estimate can contradict the reported global p-value (e.g., for the single-category effects of relationship with mother). In such cases, the reported confidence interval is more robust with corrected degrees of freedom from the pooling across multiple imputations, whereas the global p-value is based on a Wald-type test and is less robust to uncertainty attributable to multiple imputation.

Comparing results across countries should be done with caution due to possible measurement non-invariance and differences in translation.

# Tables S1a-g: Main table versions based on complete case analysis

Table S1a. Comparison of complete case estimates of means of each outcome by country and rate of missing by country

|  |  | Life Evaluation | | Life Satisfaction | | Happiness |  |
| --- | --- | --- | --- | --- | --- | --- | --- |
|  |  | Mean (SE) [SD] | (Missing) | Mean (SE) [SD] | (Missing) | Mean (SE) [SD] | (Missing) |
| Overall | N = 202,8981 | 6.4171 (0.0096) [2.4633] | 516 (0.3%) | 6.8251 (0.0102) [2.5994] | 694 (0.3%) | 6.9883 (0.0090) [2.3761] | 399 (0.2%) |
| Argentina | N = 6,7241 | 6.7477 (0.0398) [2.1851] | 7 (0.1%) | 7.2153 (0.0429) [2.3766] | 18 (0.3%) | 7.3599 (0.0388) [2.1405] | 17 (0.3%) |
| Australia | N = 3,8441 | 6.7846 (0.0372) [1.7743] | 3 (<0.1%) | 6.7188 (0.0450) [2.1047] | 8 (0.2%) | 6.8827 (0.0387) [1.8179] | 5 (0.1%) |
| Brazil | N = 13,2041 | 6.5909 (0.0272) [2.2820] | 18 (0.1%) | 7.1529 (0.0288) [2.4763] | 33 (0.3%) | 7.3342 (0.0267) [2.3010] | 37 (0.3%) |
| Egypt | N = 4,7291 | 5.0435 (0.0554) [2.8661] | 33 (0.7%) | 7.6869 (0.0548) [2.8347] | 28 (0.6%) | 6.1783 (0.0656) [2.9426] | 19 (0.4%) |
| Germany | N = 9,5061 | 6.7385 (0.0236) [1.8187] | 8 (<0.1%) | 6.9289 (0.0271) [2.0805] | 32 (0.3%) | 6.9023 (0.0250) [1.9147] | 14 (0.1%) |
| Hong Kong | N = 3,0121 | 6.8459 (0.0488) [2.0206] | 1 (<0.1%) | 7.0252 (0.0506) [2.0844] | 51 (1.7%) | 7.1630 (0.0470) [1.9970] | 5 (0.2%) |
| India | N = 12,7651 | 5.6256 (0.0466) [3.5810] | 133 (1.0%) | 7.0034 (0.0445) [3.4670] | 59 (0.5%) | 6.4764 (0.0460) [3.5587] | 38 (0.3%) |
| Indonesia | N = 6,9921 | 6.9690 (0.0479) [2.5242] | 38 (0.5%) | 7.9907 (0.0414) [2.2888] | 19 (0.3%) | 8.0423 (0.0369) [2.1951] | 23 (0.3%) |
| Israel | N = 3,6691 | 7.3308 (0.0762) [1.8109] | 3 (<0.1%) | 7.4734 (0.0856) [2.0001] | 10 (0.3%) | 7.7605 (0.0622) [1.6516] | 4 (<0.1%) |
| Japan | N = 20,5431 | 5.9241 (0.0172) [2.1438] | 79 (0.4%) | 6.0567 (0.0185) [2.3086] | 120 (0.6%) | 6.2176 (0.0171) [2.1335] | 76 (0.4%) |
| Kenya | N = 11,3891 | 5.5096 (0.0498) [3.2760] | 18 (0.2%) | 5.9678 (0.0496) [3.5116] | 14 (0.1%) | 7.2740 (0.0430) [2.9643] | 12 (0.1%) |
| Mexico | N = 5,7761 | 7.1018 (0.0345) [2.1147] | 12 (0.2%) | 7.8497 (0.0369) [2.1389] | 15 (0.3%) | 7.7862 (0.0340) [2.0297] | 19 (0.3%) |
| Nigeria | N = 6,8271 | 5.7275 (0.0631) [2.7888] | 19 (0.3%) | 6.5096 (0.0649) [2.8611] | 16 (0.2%) | 7.0633 (0.0559) [2.5879] | 12 (0.2%) |
| Philippines | N = 5,2921 | 6.3843 (0.0406) [2.3958] | 4 (<0.1%) | 7.5011 (0.0440) [2.4277] | 5 (0.1%) | 7.3259 (0.0421) [2.3335] | 3 (<0.1%) |
| Poland | N = 10,3891 | 7.1220 (0.0423) [1.6153] | 24 (0.2%) | 7.5240 (0.0506) [1.7300] | 110 (1.1%) | 7.5535 (0.0467) [1.5957] | 15 (0.1%) |
| South Africa | N = 2,6511 | 6.1068 (0.0935) [2.8385] | 6 (0.2%) | 6.3620 (0.0807) [2.8117] | 10 (0.4%) | 6.9547 (0.0801) [2.6526] | 1 (<0.1%) |
| Spain | N = 6,2901 | 6.6661 (0.0323) [1.9256] | 7 (0.1%) | 6.7882 (0.0366) [2.1770] | 16 (0.3%) | 6.9214 (0.0331) [2.0032] | 16 (0.3%) |
| Sweden | N = 15,0681 | 7.1979 (0.0171) [1.7565] | 45 (0.3%) | 7.0925 (0.0201) [2.0703] | 34 (0.2%) | 7.0316 (0.0192) [1.9620] | 38 (0.3%) |
| Tanzania | N = 9,0751 | 4.4015 (0.0829) [3.3032] | 17 (0.2%) | 5.3339 (0.0846) [3.7732] | 10 (0.1%) | 6.5767 (0.0607) [3.2633] | 13 (0.1%) |
| Turkey | N = 1,4731 | 5.1803 (0.0856) [2.5627] | 3 (0.2%) | 5.1877 (0.1083) [3.2408] | 5 (0.4%) | 5.5395 (0.0981) [2.9330] | 1 (<0.1%) |
| United Kingdom | N = 5,3681 | 6.5561 (0.0392) [2.0059] | 15 (0.3%) | 6.4908 (0.0456) [2.3075] | 38 (0.7%) | 6.7061 (0.0405) [2.0832] | 11 (0.2%) |
| United States | N = 38,3121 | 6.9361 (0.0261) [1.8543] | 21 (<0.1%) | 6.8552 (0.0298) [2.1422] | 41 (0.1%) | 7.0094 (0.0265) [1.9209] | 20 (<0.1%) |

Table S1b. Random effects meta-analyzed demographic variation for life evaluation based on complete case data

| Variable | Category | Est | 95% CI | SE | Prediction Interval LL | Prediction Interval UL | Heterogeneity (τ) | I^2 | Global p-value |
| --- | --- | --- | --- | --- | --- | --- | --- | --- | --- |
| Age group |  |  |  |  |  |  |  |  | <.001** |
|  | 18-24 | 6.52 | (6.29,6.76) | 0.12 | 5.59 | 7.73 | 0.55 | 97.5 |  |
|  | 25-29 | 6.52 | (6.29,6.76) | 0.12 | 5.59 | 7.58 | 0.55 | 97.1 |  |
|  | 30-39 | 6.47 | (6.21,6.72) | 0.13 | 5.30 | 7.49 | 0.61 | 98.8 |  |
|  | 40-49 | 6.46 | (6.20,6.71) | 0.13 | 5.29 | 7.35 | 0.61 | 98.6 |  |
|  | 50-59 | 6.61 | (6.37,6.84) | 0.12 | 5.30 | 7.30 | 0.55 | 98.3 |  |
|  | 60-69 | 6.74 | (6.48,6.99) | 0.13 | 5.32 | 7.60 | 0.59 | 98.3 |  |
|  | 70-79 | 6.88 | (6.64,7.13) | 0.12 | 5.68 | 7.88 | 0.52 | 96.9 |  |
|  | 80 or older | 7.14 | (6.89,7.40) | 0.13 | 6.33 | 7.98 | 0.45 | 80.4 |  |
| Gender |  |  |  |  |  |  |  |  | <.001** |
|  | Male | 6.55 | (6.29,6.81) | 0.13 | 5.27 | 7.51 | 0.62 | 99.4 |  |
|  | Female | 6.63 | (6.42,6.84) | 0.11 | 5.62 | 7.29 | 0.50 | 99.2 |  |
|  | Other | 6.16 | (5.74,6.57) | 0.21 | 4.93 | 7.53 | 0.63 | 66.5 |  |
| Marital status |  |  |  |  |  |  |  |  | <.001** |
|  | Married | 6.78 | (6.50,7.06) | 0.14 | 5.47 | 7.73 | 0.67 | 99.6 |  |
|  | Separated | 6.21 | (5.98,6.45) | 0.12 | 5.10 | 6.94 | 0.49 | 86.5 |  |
|  | Divorced | 6.28 | (6.00,6.57) | 0.15 | 5.02 | 7.22 | 0.62 | 96.2 |  |
|  | Widowed | 6.71 | (6.47,6.94) | 0.12 | 5.60 | 7.52 | 0.52 | 92.3 |  |
|  | Domestic partner | 6.54 | (6.34,6.75) | 0.10 | 5.62 | 7.16 | 0.42 | 95.4 |  |
|  | Single, never married | 6.35 | (6.11,6.58) | 0.12 | 5.27 | 7.50 | 0.56 | 98.8 |  |
| Employment status |  |  |  |  |  |  |  |  | <.001** |
|  | Employed for an employer | 6.60 | (6.34,6.85) | 0.13 | 5.35 | 7.47 | 0.60 | 99.4 |  |
|  | Self-employed | 6.65 | (6.36,6.94) | 0.15 | 5.31 | 7.77 | 0.68 | 98.7 |  |
|  | Retired | 6.80 | (6.53,7.07) | 0.14 | 5.19 | 7.72 | 0.62 | 98.5 |  |
|  | Student | 6.53 | (6.30,6.77) | 0.12 | 5.44 | 7.94 | 0.54 | 95.4 |  |
|  | Homemaker | 6.55 | (6.35,6.75) | 0.10 | 5.59 | 7.27 | 0.46 | 95.0 |  |
|  | Unemployed and looking for a job | 5.97 | (5.74,6.21) | 0.12 | 4.71 | 6.76 | 0.53 | 94.9 |  |
|  | None of these/other | 6.32 | (6.04,6.59) | 0.14 | 5.13 | 7.64 | 0.59 | 93.0 |  |
| Education |  |  |  |  |  |  |  |  | <.001** |
|  | Up to 8 years | 6.54 | (6.29,6.79) | 0.13 | 5.43 | 7.38 | 0.58 | 97.1 |  |
|  | 9-15 years | 6.52 | (6.29,6.75) | 0.12 | 5.42 | 7.44 | 0.55 | 99.5 |  |
|  | 16+ years | 6.73 | (6.48,6.99) | 0.13 | 5.40 | 7.42 | 0.60 | 99.3 |  |
| Religious service attendance |  |  |  |  |  |  |  |  | <.001** |
|  | >1/week | 7.06 | (6.70,7.42) | 0.18 | 5.42 | 9.02 | 0.85 | 98.6 |  |
|  | 1/week | 6.82 | (6.56,7.09) | 0.13 | 5.46 | 7.54 | 0.62 | 98.3 |  |
|  | 1-3/month | 6.65 | (6.39,6.90) | 0.13 | 5.43 | 7.29 | 0.59 | 96.9 |  |
|  | A few times a year | 6.53 | (6.27,6.78) | 0.13 | 5.27 | 7.47 | 0.60 | 98.9 |  |
|  | Never | 6.42 | (6.19,6.66) | 0.12 | 4.91 | 7.16 | 0.54 | 99.2 |  |
| Immigration status |  |  |  |  |  |  |  |  | <.001** |
|  | Born in another country | 6.58 | (6.34,6.83) | 0.12 | 5.45 | 7.15 | 0.52 | 93.2 |  |
|  | Born in this country | 6.59 | (6.36,6.83) | 0.12 | 5.45 | 7.49 | 0.56 | 99.6 |  |

Table S1c. Random effects meta-analyzed demographic variation for life satisfaction based on complete case data

| Variable | Category | Est | 95% CI | SE | Prediction Interval LL | Prediction Interval UL | Heterogeneity (τ) | I^2 | Global p-value |
| --- | --- | --- | --- | --- | --- | --- | --- | --- | --- |
| Age group |  |  |  |  |  |  |  |  | <.001** |
|  | 18-24 | 7.06 | (6.74,7.39) | 0.17 | 5.61 | 8.24 | 0.77 | 98.6 |  |
|  | 25-29 | 7.06 | (6.75,7.36) | 0.15 | 5.71 | 8.28 | 0.72 | 98.2 |  |
|  | 30-39 | 7.05 | (6.77,7.32) | 0.14 | 5.92 | 8.28 | 0.65 | 98.8 |  |
|  | 40-49 | 7.05 | (6.80,7.30) | 0.13 | 5.85 | 8.15 | 0.60 | 98.4 |  |
|  | 50-59 | 7.18 | (6.95,7.40) | 0.12 | 5.96 | 8.10 | 0.53 | 98.1 |  |
|  | 60-69 | 7.36 | (7.14,7.57) | 0.11 | 6.49 | 8.27 | 0.49 | 97.4 |  |
|  | 70-79 | 7.49 | (7.28,7.71) | 0.11 | 6.93 | 8.51 | 0.45 | 95.8 |  |
|  | 80 or older | 7.54 | (7.17,7.92) | 0.19 | 4.80 | 8.75 | 0.82 | 93.7 |  |
| Gender |  |  |  |  |  |  |  |  | <.001** |
|  | Male | 7.15 | (6.91,7.39) | 0.12 | 5.95 | 8.11 | 0.57 | 99.3 |  |
|  | Female | 7.21 | (6.98,7.44) | 0.12 | 6.19 | 8.22 | 0.54 | 99.3 |  |
|  | Other | 6.14 | (5.84,6.45) | 0.16 | 5.70 | 6.90 | 0.35 | 38.5 |  |
| Marital status |  |  |  |  |  |  |  |  | <.001** |
|  | Married | 7.40 | (7.19,7.62) | 0.11 | 6.23 | 8.24 | 0.52 | 99.3 |  |
|  | Separated | 6.75 | (6.48,7.01) | 0.14 | 5.72 | 7.82 | 0.56 | 88.3 |  |
|  | Divorced | 6.84 | (6.59,7.09) | 0.13 | 5.96 | 7.89 | 0.54 | 94.3 |  |
|  | Widowed | 7.36 | (7.15,7.57) | 0.11 | 6.66 | 8.20 | 0.46 | 90.5 |  |
|  | Domestic partner | 7.02 | (6.76,7.27) | 0.13 | 6.14 | 8.04 | 0.54 | 96.7 |  |
|  | Single, never married | 6.87 | (6.54,7.21) | 0.17 | 5.47 | 8.03 | 0.79 | 99.3 |  |
| Employment status |  |  |  |  |  |  |  |  | <.001** |
|  | Employed for an employer | 7.15 | (6.92,7.38) | 0.12 | 6.03 | 7.97 | 0.54 | 99.2 |  |
|  | Self-employed | 7.25 | (7.01,7.49) | 0.12 | 6.12 | 8.24 | 0.57 | 98.0 |  |
|  | Retired | 7.41 | (7.18,7.63) | 0.11 | 6.49 | 8.40 | 0.51 | 97.6 |  |
|  | Student | 7.04 | (6.71,7.37) | 0.17 | 5.37 | 8.29 | 0.77 | 97.3 |  |
|  | Homemaker | 7.26 | (7.02,7.51) | 0.12 | 6.47 | 8.31 | 0.56 | 96.9 |  |
|  | Unemployed and looking for a job | 6.53 | (6.16,6.89) | 0.19 | 5.00 | 7.82 | 0.85 | 97.8 |  |
|  | None of these/other | 6.85 | (6.44,7.25) | 0.21 | 5.20 | 8.50 | 0.93 | 96.8 |  |
| Education |  |  |  |  |  |  |  |  | <.001** |
|  | Up to 8 years | 7.26 | (7.00,7.51) | 0.13 | 5.76 | 8.27 | 0.59 | 97.5 |  |
|  | 9-15 years | 7.13 | (6.88,7.38) | 0.13 | 5.94 | 8.11 | 0.59 | 99.5 |  |
|  | 16+ years | 7.18 | (6.93,7.42) | 0.13 | 5.88 | 8.03 | 0.58 | 99.1 |  |
| Religious service attendance |  |  |  |  |  |  |  |  | <.001** |
|  | >1/week | 7.72 | (7.47,7.97) | 0.13 | 6.61 | 8.83 | 0.59 | 97.4 |  |
|  | 1/week | 7.45 | (7.26,7.64) | 0.10 | 6.51 | 8.20 | 0.44 | 96.7 |  |
|  | 1-3/month | 7.21 | (6.99,7.44) | 0.12 | 6.04 | 8.12 | 0.53 | 96.3 |  |
|  | A few times a year | 7.06 | (6.81,7.31) | 0.13 | 5.44 | 7.96 | 0.59 | 98.7 |  |
|  | Never | 6.94 | (6.69,7.19) | 0.13 | 5.46 | 8.11 | 0.58 | 99.1 |  |
| Immigration status |  |  |  |  |  |  |  |  | <.001** |
|  | Born in another country | 7.08 | (6.90,7.25) | 0.09 | 6.43 | 7.87 | 0.33 | 83.4 |  |
|  | Born in this country | 7.18 | (6.94,7.41) | 0.12 | 6.04 | 8.17 | 0.56 | 99.6 |  |

Table S1d. Random effects meta-analyzed demographic variation for happiness based on complete case data

| Variable | Category | Est | 95% CI | SE | Prediction Interval LL | Prediction Interval UL | Heterogeneity (τ) | I^2 | Global p-value |
| --- | --- | --- | --- | --- | --- | --- | --- | --- | --- |
| Age group |  |  |  |  |  |  |  |  | <.001** |
|  | 18-24 | 7.12 | (6.82,7.42) | 0.15 | 5.83 | 8.11 | 0.71 | 98.6 |  |
|  | 25-29 | 7.14 | (6.88,7.40) | 0.13 | 6.06 | 8.28 | 0.61 | 97.8 |  |
|  | 30-39 | 7.11 | (6.87,7.36) | 0.13 | 6.02 | 8.19 | 0.58 | 98.7 |  |
|  | 40-49 | 7.09 | (6.85,7.33) | 0.12 | 5.94 | 8.26 | 0.57 | 98.4 |  |
|  | 50-59 | 7.20 | (6.99,7.41) | 0.11 | 6.05 | 8.01 | 0.49 | 97.9 |  |
|  | 60-69 | 7.33 | (7.16,7.51) | 0.09 | 6.54 | 8.15 | 0.40 | 96.7 |  |
|  | 70-79 | 7.50 | (7.34,7.66) | 0.08 | 6.82 | 8.01 | 0.32 | 92.9 |  |
|  | 80 or older | 7.54 | (7.27,7.82) | 0.14 | 5.86 | 8.34 | 0.54 | 87.9 |  |
| Gender |  |  |  |  |  |  |  |  | <.001** |
|  | Male | 7.19 | (6.97,7.41) | 0.11 | 6.00 | 8.07 | 0.52 | 99.2 |  |
|  | Female | 7.24 | (7.04,7.44) | 0.10 | 6.26 | 8.27 | 0.48 | 99.2 |  |
|  | Other | 6.10 | (5.69,6.51) | 0.21 | 5.23 | 7.38 | 0.59 | 60.8 |  |
| Marital status |  |  |  |  |  |  |  |  | <.001** |
|  | Married | 7.43 | (7.23,7.63) | 0.10 | 6.27 | 8.24 | 0.47 | 99.2 |  |
|  | Separated | 6.84 | (6.59,7.09) | 0.13 | 5.96 | 7.71 | 0.53 | 88.8 |  |
|  | Divorced | 6.89 | (6.66,7.13) | 0.12 | 5.99 | 7.72 | 0.49 | 94.3 |  |
|  | Widowed | 7.22 | (7.04,7.41) | 0.10 | 6.61 | 8.06 | 0.40 | 88.7 |  |
|  | Domestic partner | 7.16 | (6.90,7.42) | 0.13 | 6.27 | 8.44 | 0.55 | 97.2 |  |
|  | Single, never married | 6.94 | (6.64,7.23) | 0.15 | 5.59 | 7.99 | 0.71 | 99.3 |  |
| Employment status |  |  |  |  |  |  |  |  | <.001** |
|  | Employed for an employer | 7.21 | (7.00,7.43) | 0.11 | 6.17 | 8.03 | 0.50 | 99.1 |  |
|  | Self-employed | 7.30 | (7.09,7.50) | 0.11 | 6.42 | 8.18 | 0.48 | 97.6 |  |
|  | Retired | 7.38 | (7.18,7.58) | 0.10 | 6.39 | 8.15 | 0.45 | 97.2 |  |
|  | Student | 7.06 | (6.75,7.36) | 0.16 | 5.66 | 8.27 | 0.71 | 97.4 |  |
|  | Homemaker | 7.25 | (7.03,7.47) | 0.11 | 6.31 | 8.38 | 0.51 | 96.4 |  |
|  | Unemployed and looking for a job | 6.63 | (6.27,6.99) | 0.18 | 5.15 | 7.82 | 0.84 | 98.0 |  |
|  | None of these/other | 6.95 | (6.61,7.29) | 0.17 | 5.44 | 8.17 | 0.76 | 95.8 |  |
| Education |  |  |  |  |  |  |  |  | <.001** |
|  | Up to 8 years | 7.25 | (7.00,7.50) | 0.13 | 5.89 | 8.31 | 0.59 | 97.7 |  |
|  | 9-15 years | 7.17 | (6.96,7.39) | 0.11 | 6.05 | 8.07 | 0.51 | 99.4 |  |
|  | 16+ years | 7.24 | (7.05,7.44) | 0.10 | 6.02 | 7.95 | 0.45 | 98.7 |  |
| Religious service attendance |  |  |  |  |  |  |  |  | <.001** |
|  | >1/week | 7.75 | (7.49,8.01) | 0.13 | 6.62 | 9.22 | 0.61 | 97.8 |  |
|  | 1/week | 7.49 | (7.31,7.67) | 0.09 | 6.45 | 8.15 | 0.41 | 96.8 |  |
|  | 1-3/month | 7.27 | (7.08,7.46) | 0.10 | 6.29 | 8.06 | 0.44 | 95.4 |  |
|  | A few times a year | 7.10 | (6.89,7.31) | 0.11 | 5.59 | 7.88 | 0.49 | 98.3 |  |
|  | Never | 6.97 | (6.75,7.20) | 0.11 | 5.55 | 8.11 | 0.52 | 99.1 |  |
| Immigration status |  |  |  |  |  |  |  |  | <.001** |
|  | Born in another country | 7.08 | (6.84,7.32) | 0.12 | 6.27 | 8.08 | 0.50 | 92.9 |  |
|  | Born in this country | 7.22 | (7.01,7.43) | 0.11 | 6.12 | 8.17 | 0.50 | 99.6 |  |

Table S1e. Random effects meta-analyzed childhood predictor results for life evaluation based on complete case data

| Variable | Category | Est | 95% CI | SE | Estimated Proportion of Est < -0.10 | Estimated Proportion of Est > 0.10 | Heterogeneity (τ) | I^2 | Global p-value |
| --- | --- | --- | --- | --- | --- | --- | --- | --- | --- |
| Relationship with mother | (Ref: Very bad/somewhat bad) |  |  |  |  |  |  |  | 0.004* |
|  | Very good/somewhat good | 0.10 | (0.05,0.16) | 0.03 | 0.00 | 0.50 | 0.04 | 8.4 |  |
| Relationship with father | (Ref: Very bad/somewhat bad) |  |  |  |  |  |  |  | <.001** |
|  | Very good/somewhat good | 0.17 | (0.11,0.22) | 0.03 | 0.00 | 0.73 | 0.07 | 32.8 |  |
| Parent marital status | (Ref: Parents married) |  |  |  |  |  |  |  | 0.035* |
|  | No, one or both of them had died | -0.05 | (-0.13,0.03) | 0.04 | 0.00 | 0.00 | <.01ǂ | <0.1ǂ |  |
|  | Single, never married | -0.08 | (-0.20,0.05) | 0.06 | 0.50 | 0.23 | 0.19 | 58.6 |  |
|  | Yes, married | 0.02 | (-0.05,0.09) | 0.03 | 0.09 | 0.27 | 0.09 | 39.7 |  |
| Subjective financial status of family growing up | (Ref: Got by) |  |  |  |  |  |  |  | <.001** |
|  | Lived comfortably | 0.29 | (0.21,0.38) | 0.04 | 0.00 | 0.86 | 0.19 | 88.6 |  |
|  | Found it difficult | -0.13 | (-0.20,-0.07) | 0.03 | 0.64 | 0.05 | 0.11 | 61.3 |  |
|  | Found it very difficult | -0.29 | (-0.42,-0.15) | 0.07 | 0.77 | 0.05 | 0.27 | 71.2 |  |
| Abuse | (Ref: No) |  |  |  |  |  |  |  | <.001** |
|  | Yes | -0.21 | (-0.32,-0.11) | 0.05 | 0.86 | 0.10 | 0.21 | 82.3 |  |
| Outsider growing up | (Ref: No) |  |  |  |  |  |  |  | <.001** |
|  | Yes | -0.10 | (-0.19,-0.01) | 0.05 | 0.41 | 0.09 | 0.17 | 74.4 |  |
| Self-rated health growing up | (Ref: Good) |  |  |  |  |  |  |  | <.001** |
|  | Excellent | 0.41 | (0.25,0.57) | 0.08 | 0.05 | 0.91 | 0.37 | 94.4 |  |
|  | Very good | 0.24 | (0.15,0.32) | 0.04 | 0.00 | 0.82 | 0.17 | 81.1 |  |
|  | Fair | -0.22 | (-0.29,-0.14) | 0.04 | 0.77 | 0.00 | 0.11 | 47.7 |  |
|  | Poor | -0.20 | (-0.36,-0.03) | 0.08 | 0.59 | 0.14 | 0.28 | 57.1 |  |
| Immigration status | (Ref: Born in this country) |  |  |  |  |  |  |  | <.001** |
|  | Born in another country | 0.07 | (-0.03,0.18) | 0.05 | 0.18 | 0.27 | 0.15 | 51.3 |  |
| Age 12 religious service attendance | (Ref: Never) |  |  |  |  |  |  |  | <.001** |
|  | At least 1/week | 0.20 | (0.13,0.27) | 0.04 | 0.00 | 0.82 | 0.11 | 47.6 |  |
|  | 1-3/month | 0.20 | (0.11,0.29) | 0.04 | 0.00 | 0.73 | 0.15 | 65.2 |  |
|  | Less than 1/month | 0.08 | (0.05,0.12) | 0.02 | 0.00 | 0.00 | <.01ǂ | <0.1ǂ |  |
| Year of birth | (Ref: 1998-2005; age 18-24) |  |  |  |  |  |  |  | <.001** |
|  | 1993-1998; age 25-29 | 0.02 | (-0.05,0.08) | 0.03 | 0.09 | 0.23 | 0.09 | 38.2 |  |
|  | 1983-1993; age 30-39 | -0.01 | (-0.11,0.10) | 0.05 | 0.36 | 0.27 | 0.22 | 81.8 |  |
|  | 1973-1983; age 40-49 | -0.03 | (-0.15,0.10) | 0.07 | 0.36 | 0.41 | 0.28 | 86.1 |  |
|  | 1963-1973; age 50-59 | 0.11 | (-0.02,0.24) | 0.07 | 0.23 | 0.55 | 0.27 | 84.1 |  |
|  | 1953-1963; age 60-69 | 0.25 | (0.07,0.43) | 0.09 | 0.23 | 0.55 | 0.39 | 89.4 |  |
|  | 1943-1953; age 70-79 | 0.33 | (0.09,0.57) | 0.12 | 0.14 | 0.64 | 0.51 | 90.6 |  |
|  | 1943 or earlier; age 80+ | 0.36 | (0.02,0.70) | 0.17 | 0.18 | 0.73 | 0.68 | 88.0 |  |
| Gender | (Ref: Male) |  |  |  |  |  |  |  | <.001** |
|  | Female | -0.12 | (-0.21,-0.04) | 0.04 | 0.55 | 0.09 | 0.18 | 90.6 |  |
|  | Other | -0.14 | (-0.71,0.43) | 0.29 | 0.61 | 0.33 | 1.09 | 92.1 |  |

Table S1f. Random effects meta-analyzed childhood predictor results for life satisfaction based on complete case data

| Variable | Category | Est | 95% CI | SE | Estimated Proportion of Est < -0.10 | Estimated Proportion of Est > 0.10 | Heterogeneity (τ) | I^2 | Global p-value |
| --- | --- | --- | --- | --- | --- | --- | --- | --- | --- |
| Relationship with mother | (Ref: Very bad/somewhat bad) |  |  |  |  |  |  |  | 0.076 |
|  | Very good/somewhat good | 0.11 | (0.06,0.16) | 0.03 | 0.00 | 0.73 | 0.02 | 1.6 |  |
| Relationship with father | (Ref: Very bad/somewhat bad) |  |  |  |  |  |  |  | <.001** |
|  | Very good/somewhat good | 0.17 | (0.10,0.24) | 0.04 | 0.00 | 0.68 | 0.10 | 45.8 |  |
| Parent marital status | (Ref: Parents married) |  |  |  |  |  |  |  | <.001** |
|  | No, one or both of them had died | 0.03 | (-0.10,0.15) | 0.06 | 0.23 | 0.32 | 0.20 | 48.3 |  |
|  | Single, never married | -0.02 | (-0.18,0.14) | 0.08 | 0.45 | 0.32 | 0.30 | 75.9 |  |
|  | Yes, married | 0.06 | (-0.04,0.17) | 0.05 | 0.14 | 0.41 | 0.19 | 71.2 |  |
| Subjective financial status of family growing up | (Ref: Got by) |  |  |  |  |  |  |  | <.001** |
|  | Lived comfortably | 0.26 | (0.18,0.33) | 0.04 | 0.00 | 0.86 | 0.17 | 84.9 |  |
|  | Found it difficult | -0.07 | (-0.14,-0.01) | 0.03 | 0.45 | 0.09 | 0.11 | 59.4 |  |
|  | Found it very difficult | -0.14 | (-0.25,-0.02) | 0.06 | 0.59 | 0.14 | 0.20 | 58.1 |  |
| Abuse | (Ref: No) |  |  |  |  |  |  |  | <.001** |
|  | Yes | -0.29 | (-0.38,-0.19) | 0.05 | 0.86 | 0.05 | 0.18 | 75.5 |  |
| Outsider growing up | (Ref: No) |  |  |  |  |  |  |  | <.001** |
|  | Yes | -0.20 | (-0.29,-0.11) | 0.05 | 0.73 | 0.05 | 0.18 | 73.5 |  |
| Self-rated health growing up | (Ref: Good) |  |  |  |  |  |  |  | <.001** |
|  | Excellent | 0.47 | (0.30,0.64) | 0.09 | 0.00 | 0.91 | 0.38 | 94.4 |  |
|  | Very good | 0.24 | (0.14,0.33) | 0.05 | 0.05 | 0.68 | 0.20 | 84.4 |  |
|  | Fair | -0.26 | (-0.33,-0.19) | 0.03 | 1.00 | 0.00 | 0.09 | 32.7 |  |
|  | Poor | -0.20 | (-0.37,-0.04) | 0.08 | 0.68 | 0.09 | 0.27 | 53.2 |  |
| Immigration status | (Ref: Born in this country) |  |  |  |  |  |  |  | <.001** |
|  | Born in another country | 0.06 | (-0.10,0.23) | 0.08 | 0.27 | 0.41 | 0.30 | 78.8 |  |
| Age 12 religious service attendance | (Ref: Never) |  |  |  |  |  |  |  | <.001** |
|  | At least 1/week | 0.19 | (0.05,0.33) | 0.07 | 0.23 | 0.73 | 0.29 | 85.3 |  |
|  | 1-3/month | 0.13 | (0.02,0.25) | 0.06 | 0.23 | 0.55 | 0.22 | 76.1 |  |
|  | Less than 1/month | 0.05 | (-0.04,0.13) | 0.04 | 0.09 | 0.32 | 0.15 | 70.6 |  |
| Year of birth | (Ref: 1998-2005; age 18-24) |  |  |  |  |  |  |  | <.001** |
|  | 1993-1998; age 25-29 | 0.01 | (-0.08,0.10) | 0.05 | 0.32 | 0.36 | 0.17 | 64.0 |  |
|  | 1983-1993; age 30-39 | 0.02 | (-0.12,0.15) | 0.07 | 0.27 | 0.45 | 0.30 | 88.2 |  |
|  | 1973-1983; age 40-49 | 0.01 | (-0.16,0.19) | 0.09 | 0.36 | 0.50 | 0.40 | 91.9 |  |
|  | 1963-1973; age 50-59 | 0.13 | (-0.08,0.33) | 0.11 | 0.32 | 0.59 | 0.47 | 93.6 |  |
|  | 1953-1963; age 60-69 | 0.28 | (0.06,0.50) | 0.11 | 0.23 | 0.68 | 0.49 | 92.4 |  |
|  | 1943-1953; age 70-79 | 0.40 | (0.11,0.68) | 0.15 | 0.32 | 0.64 | 0.63 | 93.3 |  |
|  | 1943 or earlier; age 80+ | 0.50 | (0.13,0.88) | 0.19 | 0.23 | 0.73 | 0.80 | 90.3 |  |
| Gender | (Ref: Male) |  |  |  |  |  |  |  | <.001** |
|  | Female | -0.11 | (-0.18,-0.03) | 0.04 | 0.50 | 0.14 | 0.16 | 87.3 |  |
|  | Other | -0.28 | (-0.82,0.26) | 0.28 | 0.61 | 0.22 | 1.07 | 91.3 |  |

# Tables S2a-g: Argentina

Table S2a. Nationally representative descriptive statistics for Argentina

| **Characteristic** | **N = 6,724**1 |
| --- | --- |
| **Age group** |  |
| 1998-2005; age 18-24 | 1,108 (16%) |
| 1993-1998; age 25-29 | 719 (11%) |
| 1983-1993; age 30-39 | 1,432 (21%) |
| 1973-1983; age 40-49 | 1,254 (19%) |
| 1963-1973; age 50-59 | 1,014 (15%) |
| 1953-1963; age 60-69 | 730 (11%) |
| 1943-1953; age 70-79 | 356 (5.3%) |
| 1943 or earlier; age 80+ | 112 (1.7%) |
| (Missing) | 0 (0%) |
| **Gender** |  |
| Male | 3,143 (47%) |
| Female | 3,542 (53%) |
| Other | 21 (0.3%) |
| (Missing) | 18 (0.3%) |
| **Race/Ethnicity** |  |
| Asian | 43 (0.6%) |
| Black | 95 (1.4%) |
| Indigenous | 129 (1.9%) |
| Mestizo(a) | 1,801 (27%) |
| Mullato(a) | 75 (1.1%) |
| Other | 104 (1.5%) |
| White | 3,406 (51%) |
| (Missing) | 1,070 (16%) |
| **Respondent Marital status** |  |
| Married | 1,565 (23%) |
| Separated | 455 (6.8%) |
| Divorced | 321 (4.8%) |
| Widowed | 401 (6.0%) |
| Single, never married | 2,381 (35%) |
| Domestic Partner | 1,514 (23%) |
| (Missing) | 88 (1.3%) |
| **Employment** |  |
| Employed for an employer | 2,440 (36%) |
| Self-employed | 1,748 (26%) |
| Retired | 773 (11%) |
| Student | 354 (5.3%) |
| Homemaker | 639 (9.5%) |
| Unemployed and looking for a job | 569 (8.5%) |
| None of these/Other | 179 (2.7%) |
| (Missing) | 22 (0.3%) |
| **Religious service attendance as an adult (now)** |  |
| More than 1/week | 532 (7.9%) |
| 1/week | 773 (12%) |
| 1-3/month | 461 (6.8%) |
| A few times a year | 1,949 (29%) |
| Never | 2,982 (44%) |
| (Missing) | 27 (0.4%) |
| **Education (years)** |  |
| Up to 8 years | 2,263 (34%) |
| 9-15 years | 3,823 (57%) |
| 16+ years | 635 (9.4%) |
| (Missing) | 3 (<0.1%) |
| **Immigration status** |  |
| Born in this country | 6,346 (94%) |
| Born in another country | 348 (5.2%) |
| (Missing) | 29 (0.4%) |
| **Religious affiliation as an adult (now)** |  |
| Christianity | 4,992 (74%) |
| Islam | 9 (0.1%) |
| Hinduism | 6 (<0.1%) |
| Buddhism | 35 (0.5%) |
| Judaism | 40 (0.6%) |
| Sikhism | 0 (<0.1%) |
| Baha'i | 0 (0%) |
| Jainism | 0 (0%) |
| Shinto | 0 (0%) |
| Taoism | 2 (<0.1%) |
| Confucianism | 0 (<0.1%) |
| Primal, Animist, or Folk religion | 19 (0.3%) |
| Spiritism | 0 (0%) |
| Umbanda, Candomble, and other African-derived religions | 0 (0%) |
| Chinese folk/traditional religion | 0 (0%) |
| Some other religion | 156 (2.3%) |
| No religion/Atheist/Agnostic | 1,352 (20%) |
| (Missing) | 111 (1.7%) |
| **Relationship with mother growing up** |  |
| Very good | 4,463 (66%) |
| Somewhat good | 1,436 (21%) |
| Somewhat bad | 299 (4.4%) |
| Very bad | 216 (3.2%) |
| Does not apply | 273 (4.1%) |
| (Missing) | 36 (0.5%) |
| **Relationship with father growing up** |  |
| Very good | 3,612 (54%) |
| Somewhat good | 1,537 (23%) |
| Somewhat bad | 440 (6.5%) |
| Very bad | 401 (6.0%) |
| Does not apply | 694 (10%) |
| (Missing) | 39 (0.6%) |
| **Parent marital status at age 12** |  |
| Parents married | 4,110 (61%) |
| Divorced | 637 (9.5%) |
| Parents were never married | 1,368 (20%) |
| One or both parents had died | 199 (3.0%) |
| (Missing) | 410 (6.1%) |
| **Subjective financial status of family growing up** |  |
| Lived comfortably | 2,042 (30%) |
| Got by | 2,305 (34%) |
| Found it difficult | 1,789 (27%) |
| Found it very difficult | 569 (8.5%) |
| (Missing) | 19 (0.3%) |
| **Abuse** |  |
| Yes | 1,302 (19%) |
| No | 5,271 (78%) |
| (Missing) | 151 (2.2%) |
| **Outsider growing up** |  |
| Yes | 1,165 (17%) |
| No | 5,458 (81%) |
| (Missing) | 101 (1.5%) |
| **Self-rated health growing up** |  |
| Excellent | 2,402 (36%) |
| Very good | 1,819 (27%) |
| Good | 1,830 (27%) |
| Fair | 505 (7.5%) |
| Poor | 156 (2.3%) |
| (Missing) | 12 (0.2%) |
| **Age 12 religious service attendance** |  |
| At least 1/week | 2,601 (39%) |
| 1-3/month | 1,204 (18%) |
| <1/month | 1,059 (16%) |
| Never | 1,808 (27%) |
| (Missing) | 53 (0.8%) |
| **Religious affiliation at age 12** |  |
| Christianity | 5,805 (86%) |
| Islam | 11 (0.2%) |
| Hinduism | 2 (<0.1%) |
| Buddhism | 3 (<0.1%) |
| Judaism | 51 (0.8%) |
| Sikhism | 5 (<0.1%) |
| Baha'i | 0 (0%) |
| Jainism | 0 (0%) |
| Shinto | 0 (0%) |
| Taoism | 1 (<0.1%) |
| Confucianism | 0 (0%) |
| Primal, Animist, or Folk religion | 17 (0.2%) |
| Spiritism | 0 (0%) |
| Umbanda, Candomble, and other African-derived religions | 0 (0%) |
| Chinese folk/traditional religion | 0 (0%) |
| Some other religion | 10 (0.2%) |
| No religion/Atheist/Agnostic | 697 (10%) |
| (Missing) | 122 (1.8%) |
| 1n (%) | |

Table S2b. Means by demographic category for Argentina

|  | | Life Evaluation | | | | Life Satisfaction | | | | Happiness | | | |
| --- | --- | --- | --- | --- | --- | --- | --- | --- | --- | --- | --- | --- | --- |
| Variable | Category | Mean | 95% CI | SE | Global p-value | Mean | 95% CI | SE | Global p-value | Mean | 95% CI | SE | Global p-value |
| Age group | 18-24 | 6.80 | (6.62,6.98) | 0.09 | 0.868 | 6.98 | (6.76,7.19) | 0.11 | < .001 | 7.20 | (7.01,7.38) | 0.10 | 0.054 |
|  | 25-29 | 6.85 | (6.59,7.10) | 0.13 |  | 7.09 | (6.81,7.37) | 0.14 |  | 7.39 | (7.16,7.62) | 0.12 |  |
|  | 30-39 | 6.73 | (6.57,6.89) | 0.08 |  | 7.02 | (6.84,7.20) | 0.09 |  | 7.33 | (7.17,7.50) | 0.08 |  |
|  | 40-49 | 6.80 | (6.62,6.97) | 0.09 |  | 7.47 | (7.30,7.64) | 0.09 |  | 7.60 | (7.44,7.76) | 0.08 |  |
|  | 50-59 | 6.67 | (6.48,6.85) | 0.09 |  | 7.44 | (7.26,7.62) | 0.09 |  | 7.43 | (7.25,7.61) | 0.09 |  |
|  | 60-69 | 6.65 | (6.40,6.90) | 0.13 |  | 7.24 | (6.98,7.51) | 0.13 |  | 7.31 | (7.08,7.54) | 0.12 |  |
|  | 70-79 | 6.63 | (6.23,7.04) | 0.21 |  | 7.28 | (6.87,7.68) | 0.20 |  | 7.08 | (6.66,7.51) | 0.22 |  |
|  | 80 or older | 6.96 | (6.19,7.72) | 0.39 |  | 7.60 | (6.72,8.48) | 0.44 |  | 7.13 | (6.45,7.81) | 0.34 |  |
| Gender | Male | 6.75 | (6.64,6.86) | 0.06 | 0.197 | 7.27 | (7.15,7.39) | 0.06 | 0.131 | 7.38 | (7.26,7.49) | 0.06 | 0.767 |
|  | Female | 6.75 | (6.64,6.86) | 0.06 |  | 7.17 | (7.05,7.29) | 0.06 |  | 7.35 | (7.25,7.45) | 0.05 |  |
|  | Other | 5.79 | (4.66,6.92) | 0.53 |  | 6.15 | (4.74,7.56) | 0.66 |  | 6.81 | (5.03,8.59) | 0.84 |  |
| Marital status | Married | 6.98 | (6.82,7.13) | 0.08 | 0.004 | 7.53 | (7.36,7.70) | 0.09 | < .001 | 7.70 | (7.55,7.85) | 0.08 | < .001 |
|  | Separated | 6.84 | (6.56,7.13) | 0.15 |  | 7.08 | (6.77,7.39) | 0.16 |  | 7.25 | (6.97,7.53) | 0.14 |  |
|  | Divorced | 6.56 | (6.21,6.92) | 0.18 |  | 7.15 | (6.81,7.48) | 0.17 |  | 7.28 | (6.95,7.62) | 0.17 |  |
|  | Widowed | 6.67 | (6.29,7.04) | 0.19 |  | 7.52 | (7.20,7.83) | 0.16 |  | 7.20 | (6.86,7.55) | 0.17 |  |
|  | Never | 6.57 | (6.44,6.71) | 0.07 |  | 6.94 | (6.79,7.09) | 0.08 |  | 7.05 | (6.91,7.18) | 0.07 |  |
|  | Domestic Partner | 6.82 | (6.67,6.97) | 0.08 |  | 7.29 | (7.14,7.45) | 0.08 |  | 7.60 | (7.45,7.74) | 0.07 |  |
| Employment | Employed for an employer | 6.94 | (6.83,7.06) | 0.06 | < .001 | 7.31 | (7.19,7.44) | 0.06 | < .001 | 7.48 | (7.37,7.59) | 0.06 | < .001 |
|  | Self-employed | 6.73 | (6.58,6.88) | 0.08 |  | 7.35 | (7.19,7.50) | 0.08 |  | 7.49 | (7.34,7.63) | 0.07 |  |
|  | Retired | 6.71 | (6.44,6.97) | 0.13 |  | 7.28 | (7.00,7.56) | 0.14 |  | 7.15 | (6.89,7.41) | 0.13 |  |
|  | Student | 6.78 | (6.52,7.03) | 0.13 |  | 6.90 | (6.61,7.20) | 0.15 |  | 7.07 | (6.79,7.35) | 0.14 |  |
|  | Homemaker | 6.82 | (6.55,7.09) | 0.14 |  | 7.41 | (7.11,7.70) | 0.15 |  | 7.59 | (7.34,7.84) | 0.13 |  |
|  | Unemployed and looking for a job | 6.11 | (5.80,6.42) | 0.16 |  | 6.50 | (6.17,6.84) | 0.17 |  | 6.88 | (6.57,7.19) | 0.16 |  |
|  | None of these/Other | 6.15 | (5.53,6.77) | 0.31 |  | 6.48 | (5.87,7.09) | 0.31 |  | 6.77 | (6.16,7.37) | 0.31 |  |
| Religious service attendance | More than 1/week | 7.38 | (7.06,7.69) | 0.16 | < .001 | 8.45 | (8.17,8.73) | 0.14 | < .001 | 8.52 | (8.30,8.74) | 0.11 | < .001 |
|  | 1/week | 7.21 | (7.00,7.42) | 0.11 |  | 7.66 | (7.43,7.90) | 0.12 |  | 7.64 | (7.41,7.88) | 0.12 |  |
|  | 1-3/month | 6.72 | (6.39,7.06) | 0.17 |  | 7.18 | (6.85,7.50) | 0.17 |  | 7.42 | (7.16,7.68) | 0.13 |  |
|  | A few times a year | 6.76 | (6.63,6.90) | 0.07 |  | 7.22 | (7.07,7.37) | 0.08 |  | 7.44 | (7.30,7.57) | 0.07 |  |
|  | Never | 6.51 | (6.39,6.63) | 0.06 |  | 6.88 | (6.75,7.01) | 0.06 |  | 7.03 | (6.91,7.14) | 0.06 |  |
| Education | Up to 8 years | 6.69 | (6.51,6.88) | 0.09 | < .001 | 7.44 | (7.25,7.63) | 0.10 | 0.004 | 7.49 | (7.31,7.67) | 0.09 | 0.134 |
|  | 9-15 years | 6.73 | (6.65,6.81) | 0.04 |  | 7.08 | (6.99,7.17) | 0.05 |  | 7.29 | (7.21,7.37) | 0.04 |  |
|  | 16+ years | 7.05 | (6.90,7.19) | 0.08 |  | 7.21 | (7.03,7.39) | 0.09 |  | 7.33 | (7.16,7.49) | 0.08 |  |
| Immigration status | Born in this country | 6.75 | (6.67,6.83) | 0.04 | 0.754 | 7.21 | (7.12,7.29) | 0.04 | 0.427 | 7.36 | (7.28,7.44) | 0.04 | 0.703 |
|  | Born in another country | 6.68 | (6.27,7.10) | 0.21 |  | 7.37 | (6.97,7.77) | 0.20 |  | 7.42 | (7.10,7.74) | 0.16 |  |
| Religious affiliation | Christianity | 6.81 | (6.71,6.90) | 0.05 | < .001 | 7.36 | (7.26,7.46) | 0.05 | < .001 | 7.47 | (7.38,7.55) | 0.04 | < .001 |
|  | Islam | 7.81 | (4.65,10.0***ǂ***) | 1.19 |  | 8.39 | (5.83,10.0***ǂ***) | 1.11 |  | 8.97 | (7.67,10.0***ǂ***) | 0.54 |  |
|  | Hinduism | 7.83 | * | * |  | 5.39 | * | * |  | 6.96 | * | * |  |
|  | Buddhism | 6.94 | (6.34,7.54) | 0.29 |  | 7.11 | (6.38,7.84) | 0.34 |  | 7.45 | (6.87,8.04) | 0.28 |  |
|  | Judaism | 7.57 | (6.75,8.39) | 0.40 |  | 7.30 | (6.54,8.06) | 0.37 |  | 6.62 | (5.12,8.12) | 0.73 |  |
|  | Sikhism | 8.00 | * | * |  | 8.00 | * | * |  | 9.00 | * | * |  |
|  | Taoism | 7.19 | * | * |  | 7.42 | * | * |  | 7.35 | * | * |  |
|  | Confucianism | 0.00 | * | * |  | 6.00 | * | * |  | 6.00 | * | * |  |
|  | Primal, Animist, or Folk religion | 7.22 | (5.32,9.13) | 0.78 |  | 7.13 | (4.86,9.41) | 0.91 |  | 8.24 | (6.48,10.00) | 0.71 |  |
|  | Some other religion | 6.35 | (5.70,7.00) | 0.33 |  | 7.16 | (6.52,7.80) | 0.32 |  | 7.83 | (7.38,8.28) | 0.23 |  |
|  | No religion/Atheist/Agnostic | 6.54 | (6.38,6.69) | 0.08 |  | 6.70 | (6.52,6.87) | 0.09 |  | 6.92 | (6.76,7.08) | 0.08 |  |
| Race/Ethnicity | Asian | 7.09 | (5.67,8.51) | 0.69 | 0.012 | 7.58 | (6.12,9.04) | 0.71 | < .001 | 7.61 | (6.35,8.87) | 0.61 | 0.015 |
|  | Black | 7.60 | (6.89,8.30) | 0.35 |  | 8.55 | (7.71,9.39) | 0.41 |  | 8.46 | (7.77,9.16) | 0.35 |  |
|  | Indigenous | 6.77 | (5.99,7.55) | 0.38 |  | 7.29 | (6.53,8.05) | 0.37 |  | 7.14 | (6.47,7.81) | 0.34 |  |
|  | Mestizo(a) | 6.71 | (6.56,6.86) | 0.07 |  | 7.27 | (7.11,7.43) | 0.08 |  | 7.38 | (7.24,7.51) | 0.07 |  |
|  | Mullato(a) | 7.36 | (6.72,8.01) | 0.32 |  | 7.57 | (6.88,8.27) | 0.35 |  | 7.67 | (7.03,8.32) | 0.32 |  |
|  | White | 6.74 | (6.64,6.84) | 0.05 |  | 7.16 | (7.05,7.27) | 0.06 |  | 7.32 | (7.22,7.42) | 0.05 |  |
|  | Other | 6.24 | (5.49,6.98) | 0.37 |  | 6.33 | (5.55,7.10) | 0.39 |  | 7.18 | (6.56,7.80) | 0.31 |  |

Table S2c. Childhood predictors regression analysis results for Argentina

|  | | Life Evaluation | | | | Life Satisfaction | | | | Happiness | | | |
| --- | --- | --- | --- | --- | --- | --- | --- | --- | --- | --- | --- | --- | --- |
| Variable | Category | Est | 95% CI | SE | Global p-value | Est | 95% CI | SE | Global p-value | Est | 95% CI | SE | Global p-value |
| Relationship with mother | (Ref: Very bad/somewhat bad) |  |  |  | 0.100 |  |  |  | <.001 |  |  |  | <.001 |
|  | Very good/somewhat good | 0.26 | (-0.05, 0.58) | 0.16 |  | 0.61 | (0.24, 0.97) | 0.19 |  | 0.58 | (0.27, 0.89) | 0.16 |  |
| Relationship with father | (Ref: Very bad/somewhat bad) |  |  |  | 0.242 |  |  |  | 0.206 |  |  |  | 0.301 |
|  | Very good/somewhat good | 0.14 | (-0.11, 0.39) | 0.13 |  | 0.16 | (-0.09, 0.41) | 0.13 |  | 0.13 | (-0.12, 0.38) | 0.13 |  |
| Parent marital status | (Ref: Parents married) |  |  |  | 0.351 |  |  |  | 0.528 |  |  |  | 0.760 |
|  | Divorced | -0.08 | (-0.33, 0.18) | 0.13 |  | 0.01 | (-0.27, 0.28) | 0.14 |  | -0.11 | (-0.36, 0.15) | 0.13 |  |
|  | Parents were never married | 0.04 | (-0.18, 0.27) | 0.12 |  | 0.16 | (-0.09, 0.41) | 0.13 |  | 0.00 | (-0.23, 0.23) | 0.12 |  |
|  | One or both parents had died | -0.39 | (-0.91, 0.13) | 0.27 |  | 0.11 | (-0.40, 0.62) | 0.26 |  | -0.15 | (-0.69, 0.38) | 0.27 |  |
| Subjective financial status of family growing up | (Ref: Got by) |  |  |  | <.001 |  |  |  | <.001 |  |  |  | <.001 |
|  | Lived comfortably | 0.39 | (0.21, 0.56) | 0.09 |  | 0.42 | (0.24, 0.61) | 0.09 |  | 0.27 | (0.10, 0.44) | 0.09 |  |
|  | Found it difficult | -0.14 | (-0.34, 0.06) | 0.10 |  | -0.11 | (-0.31, 0.10) | 0.11 |  | -0.11 | (-0.30, 0.08) | 0.10 |  |
|  | Found it very difficult | -0.45 | (-0.79, -0.10) | 0.18 |  | 0.18 | (-0.20, 0.56) | 0.20 |  | 0.02 | (-0.34, 0.39) | 0.19 |  |
| Abuse | (Ref: No) |  |  |  | 0.260 |  |  |  | <.001 |  |  |  | 0.021 |
|  | Yes | -0.12 | (-0.32, 0.09) | 0.11 |  | -0.51 | (-0.74, -0.28) | 0.12 |  | -0.24 | (-0.44, -0.04) | 0.10 |  |
| Outsider growing up | (Ref: No) |  |  |  | 0.015 |  |  |  | 0.011 |  |  |  | 0.014 |
|  | Yes | -0.30 | (-0.55, -0.06) | 0.13 |  | -0.34 | (-0.61, -0.08) | 0.14 |  | -0.30 | (-0.55, -0.05) | 0.13 |  |
| Self-rated health growing up | (Ref: Good) |  |  |  | 0.001 |  |  |  | <.001 |  |  |  | <.001 |
|  | Excellent | 0.35 | (0.16, 0.55) | 0.10 |  | 0.34 | (0.13, 0.55) | 0.11 |  | 0.39 | (0.19, 0.59) | 0.10 |  |
|  | Very good | 0.16 | (-0.04, 0.35) | 0.10 |  | 0.09 | (-0.12, 0.30) | 0.11 |  | 0.04 | (-0.15, 0.24) | 0.10 |  |
|  | Fair | -0.05 | (-0.39, 0.28) | 0.17 |  | -0.21 | (-0.61, 0.20) | 0.21 |  | -0.12 | (-0.48, 0.23) | 0.18 |  |
|  | Poor | -0.56 | (-1.34, 0.22) | 0.40 |  | -0.90 | (-1.74, -0.06) | 0.43 |  | -0.74 | (-1.54, 0.07) | 0.41 |  |
| Immigration status | (Ref: Born in this country) |  |  |  | 0.764 |  |  |  | 0.443 |  |  |  | 0.654 |
|  | Born in another country | -0.06 | (-0.47, 0.35) | 0.21 |  | 0.15 | (-0.23, 0.53) | 0.20 |  | 0.07 | (-0.24, 0.38) | 0.16 |  |
| Age 12 religious service attendance | (Ref: Never) |  |  |  | 0.802 |  |  |  | 0.052 |  |  |  | 0.058 |
|  | At least 1/week | 0.10 | (-0.12, 0.31) | 0.11 |  | 0.16 | (-0.06, 0.39) | 0.11 |  | 0.20 | (-0.00, 0.41) | 0.11 |  |
|  | 1-3/month | 0.02 | (-0.22, 0.26) | 0.12 |  | -0.14 | (-0.40, 0.11) | 0.13 |  | 0.07 | (-0.16, 0.30) | 0.12 |  |
|  | < 1/month | 0.05 | (-0.17, 0.27) | 0.11 |  | -0.02 | (-0.26, 0.22) | 0.12 |  | -0.06 | (-0.29, 0.17) | 0.12 |  |
| Year of birth | (Ref: 1998-2005; current age: 18-24) |  |  |  | 0.973 |  |  |  | <.001 |  |  |  | 0.043 |
|  | 1993-1998; age 25-29 | 0.03 | (-0.26, 0.33) | 0.15 |  | 0.05 | (-0.28, 0.39) | 0.17 |  | 0.13 | (-0.15, 0.40) | 0.14 |  |
|  | 1983-1993; age 30-39 | -0.03 | (-0.26, 0.20) | 0.12 |  | 0.05 | (-0.23, 0.32) | 0.14 |  | 0.11 | (-0.13, 0.35) | 0.12 |  |
|  | 1973-1983; age 40-49 | 0.04 | (-0.20, 0.29) | 0.13 |  | 0.50 | (0.23, 0.78) | 0.14 |  | 0.37 | (0.13, 0.61) | 0.12 |  |
|  | 1963-1973; age 50-59 | -0.06 | (-0.32, 0.21) | 0.14 |  | 0.51 | (0.22, 0.80) | 0.15 |  | 0.21 | (-0.05, 0.47) | 0.13 |  |
|  | 1953-1963; age 60-69 | -0.10 | (-0.41, 0.20) | 0.16 |  | 0.26 | (-0.07, 0.60) | 0.17 |  | 0.06 | (-0.23, 0.36) | 0.15 |  |
|  | 1943-1953; age 70-79 | -0.12 | (-0.56, 0.33) | 0.23 |  | 0.32 | (-0.11, 0.75) | 0.22 |  | -0.15 | (-0.59, 0.29) | 0.23 |  |
|  | 1943 or earlier; age 80+ | 0.11 | (-0.67, 0.89) | 0.40 |  | 0.45 | (-0.37, 1.27) | 0.42 |  | -0.24 | (-0.91, 0.42) | 0.34 |  |
| Gender | (Ref: Male) |  |  |  | 0.157 |  |  |  | 0.589 |  |  |  | 0.461 |
|  | Female | 0.09 | (-0.06, 0.24) | 0.08 |  | 0.05 | (-0.12, 0.21) | 0.08 |  | 0.09 | (-0.06, 0.24) | 0.08 |  |
|  | Other | -0.81 | (-1.91, 0.29) | 0.56 |  | -0.46 | (-1.60, 0.68) | 0.58 |  | -0.17 | (-1.47, 1.14) | 0.67 |  |
| Religious affiliation | (Ref: No religion/Atheist/Agnostic) |  |  |  | 0.217 |  |  |  | 0.843 |  |  |  | 0.772 |
|  | Christianity | 0.01 | (-0.26, 0.27) | 0.13 |  | 0.01 | (-0.28, 0.31) | 0.15 |  | 0.07 | (-0.18, 0.33) | 0.13 |  |
|  | Collapsed affiliations with prevalence<3% | 0.44 | (-0.11, 0.99) | 0.28 |  | 0.14 | (-0.45, 0.73) | 0.30 |  | -0.09 | (-0.91, 0.73) | 0.42 |  |
| Race/ethnicity | (Ref: Plurality group) |  |  |  | 0.065 |  |  |  | 0.002 |  |  |  | 0.021 |
|  | Non-plurality groups | 0.14 | (-0.09, 0.36) | 0.11 |  | 0.27 | (0.08, 0.45) | 0.09 |  | 0.18 | (0.02, 0.34) | 0.08 |  |

Table S2d. Sensitivity to unmeasured confounding of childhood predictors in Argentina

|  | | Life Evaluation | | Life Satisfaction | | Happiness | |
| --- | --- | --- | --- | --- | --- | --- | --- |
| Variable | Category | E-value for Estimate | E-value for 95% CI | E-value for Estimate | E-value for 95% CI | E-value for Estimate | E-value for 95% CI |
| Relationship with mother | (Ref: Very bad/somewhat bad) |  |  |  |  |  |  |
|  | Very good/somewhat good | 1.47 | 1.00 | 1.84 | 1.42 | 1.88 | 1.49 |
| Relationship with father | (Ref: Very bad/somewhat bad) |  |  |  |  |  |  |
|  | Very good/somewhat good | 1.31 | 1.00 | 1.32 | 1.00 | 1.31 | 1.00 |
| Parent marital status | (Ref: Parents married) |  |  |  |  |  |  |
|  | Divorced | 1.21 | 1.00 | 1.06 | 1.00 | 1.27 | 1.00 |
|  | Parents were never married | 1.15 | 1.00 | 1.32 | 1.00 | 1.01 | 1.00 |
|  | One or both parents had died | 1.63 | 1.00 | 1.26 | 1.00 | 1.33 | 1.00 |
| Subjective financial status of family growing up | (Ref: Got by) |  |  |  |  |  |  |
|  | Lived comfortably | 1.63 | 1.41 | 1.63 | 1.42 | 1.49 | 1.26 |
|  | Found it difficult | 1.31 | 1.00 | 1.25 | 1.00 | 1.27 | 1.00 |
|  | Found it very difficult | 1.70 | 1.26 | 1.35 | 1.00 | 1.11 | 1.00 |
| Abuse | (Ref: No) |  |  |  |  |  |  |
|  | Yes | 1.28 | 1.00 | 1.73 | 1.46 | 1.45 | 1.14 |
| Outsider growing up | (Ref: No) |  |  |  |  |  |  |
|  | Yes | 1.53 | 1.18 | 1.54 | 1.21 | 1.53 | 1.17 |
| Self-rated health growing up | (Ref: Good) |  |  |  |  |  |  |
|  | Excellent | 1.59 | 1.34 | 1.54 | 1.28 | 1.64 | 1.39 |
|  | Very good | 1.34 | 1.00 | 1.22 | 1.00 | 1.16 | 1.00 |
|  | Fair | 1.17 | 1.00 | 1.38 | 1.00 | 1.29 | 1.00 |
|  | Poor | 1.84 | 1.00 | 2.17 | 1.18 | 2.08 | 1.00 |
| Immigration status | (Ref: Born in this country) |  |  |  |  |  |  |
|  | Born in another country | 1.19 | 1.00 | 1.31 | 1.00 | 1.20 | 1.00 |
| Age 12 religious service attendance | (Ref: Never) |  |  |  |  |  |  |
|  | At least 1/week | 1.25 | 1.00 | 1.33 | 1.00 | 1.40 | 1.00 |
|  | 1-3/month | 1.10 | 1.00 | 1.30 | 1.00 | 1.21 | 1.00 |
|  | < 1/month | 1.16 | 1.00 | 1.10 | 1.00 | 1.19 | 1.00 |
| Year of birth | (Ref: 1998-2005; current age: 18-24) |  |  |  |  |  |  |
|  | 1993-1998; age 25-29 | 1.14 | 1.00 | 1.17 | 1.00 | 1.30 | 1.00 |
|  | 1983-1993; age 30-39 | 1.13 | 1.00 | 1.15 | 1.00 | 1.27 | 1.00 |
|  | 1973-1983; age 40-49 | 1.15 | 1.00 | 1.72 | 1.41 | 1.62 | 1.30 |
|  | 1963-1973; age 50-59 | 1.18 | 1.00 | 1.73 | 1.40 | 1.41 | 1.00 |
|  | 1953-1963; age 60-69 | 1.26 | 1.00 | 1.45 | 1.00 | 1.19 | 1.00 |
|  | 1943-1953; age 70-79 | 1.28 | 1.00 | 1.51 | 1.00 | 1.33 | 1.00 |
|  | 1943 or earlier; age 80+ | 1.26 | 1.00 | 1.66 | 1.00 | 1.46 | 1.00 |
| Gender | (Ref: Male) |  |  |  |  |  |  |
|  | Female | 1.24 | 1.00 | 1.15 | 1.00 | 1.24 | 1.00 |
|  | Other | 2.15 | 1.00 | 1.67 | 1.00 | 1.35 | 1.00 |
| Religious affiliation | (Ref: No religion/Atheist/Agnostic) |  |  |  |  |  |  |
|  | Christianity | 1.05 | 1.00 | 1.08 | 1.00 | 1.21 | 1.00 |
|  | Collapsed affiliations with prevalence<3% | 1.69 | 1.00 | 1.30 | 1.00 | 1.24 | 1.00 |
| Race/ethnicity | (Ref: Plurality group) |  |  |  |  |  |  |
|  | Non-plurality groups | 1.31 | 1.00 | 1.45 | 1.22 | 1.37 | 1.11 |

Table S2e. Complete-case supplemental analysis of means by demographic category for Argentina

|  | | Life Evaluation | | | | Life Satisfaction | | | | Happiness | | | |
| --- | --- | --- | --- | --- | --- | --- | --- | --- | --- | --- | --- | --- | --- |
| Variable | Category | Mean | 95% CI | SE | Global p-value | Mean | 95% CI | SE | Global p-value | Mean | 95% CI | SE | Global p-value |
| Age group | 18-24 | 6.88 | (6.71,7.05) | 0.09 | 0.619 | 7.12 | (6.92,7.33) | 0.10 | < .001 | 7.31 | (7.14,7.48) | 0.09 | 0.039 |
|  | 25-29 | 7.00 | (6.77,7.23) | 0.12 |  | 7.40 | (7.17,7.62) | 0.11 |  | 7.51 | (7.29,7.72) | 0.11 |  |
|  | 30-39 | 6.85 | (6.70,6.99) | 0.07 |  | 7.24 | (7.08,7.39) | 0.08 |  | 7.46 | (7.31,7.60) | 0.07 |  |
|  | 40-49 | 6.95 | (6.80,7.10) | 0.08 |  | 7.58 | (7.42,7.75) | 0.08 |  | 7.70 | (7.55,7.85) | 0.08 |  |
|  | 50-59 | 6.76 | (6.58,6.94) | 0.09 |  | 7.59 | (7.43,7.76) | 0.08 |  | 7.55 | (7.40,7.71) | 0.08 |  |
|  | 60-69 | 6.83 | (6.61,7.05) | 0.11 |  | 7.44 | (7.21,7.67) | 0.12 |  | 7.38 | (7.15,7.60) | 0.11 |  |
|  | 70-79 | 6.78 | (6.43,7.14) | 0.18 |  | 7.41 | (7.05,7.77) | 0.18 |  | 7.39 | (7.05,7.74) | 0.17 |  |
|  | 80 or older | 7.22 | (6.58,7.86) | 0.32 |  | 8.17 | (7.70,8.64) | 0.24 |  | 7.32 | (6.73,7.91) | 0.30 |  |
| Gender | Female | 6.90 | (6.80,7.00) | 0.05 | 0.106 | 7.40 | (7.30,7.50) | 0.05 | 0.253 | 7.48 | (7.38,7.57) | 0.05 | 0.689 |
|  | Male | 6.86 | (6.76,6.96) | 0.05 |  | 7.41 | (7.30,7.52) | 0.06 |  | 7.50 | (7.39,7.60) | 0.05 |  |
|  | Other | 5.79 | (4.65,6.93) | 0.54 |  | 6.32 | (4.92,7.71) | 0.66 |  | 6.79 | (5.01,8.58) | 0.84 |  |
| Marital status | Divorced | 6.77 | (6.48,7.06) | 0.15 | 0.010 | 7.28 | (6.97,7.58) | 0.15 | < .001 | 7.51 | (7.26,7.75) | 0.12 | < .001 |
|  | Domestic partner | 6.92 | (6.78,7.05) | 0.07 |  | 7.42 | (7.28,7.56) | 0.07 |  | 7.67 | (7.54,7.80) | 0.07 |  |
|  | Married | 7.08 | (6.94,7.22) | 0.07 |  | 7.71 | (7.56,7.86) | 0.08 |  | 7.82 | (7.68,7.95) | 0.07 |  |
|  | Separated | 6.90 | (6.62,7.19) | 0.15 |  | 7.19 | (6.90,7.49) | 0.15 |  | 7.28 | (7.00,7.56) | 0.14 |  |
|  | Single/Never been married | 6.73 | (6.61,6.85) | 0.06 |  | 7.20 | (7.07,7.33) | 0.07 |  | 7.21 | (7.09,7.32) | 0.06 |  |
|  | Widowed | 6.84 | (6.51,7.17) | 0.17 |  | 7.60 | (7.29,7.91) | 0.16 |  | 7.32 | (7.00,7.64) | 0.16 |  |
| Employment | Employed for an employer | 7.00 | (6.89,7.11) | 0.06 | 0.009 | 7.41 | (7.29,7.53) | 0.06 | < .001 | 7.55 | (7.44,7.66) | 0.05 | 0.002 |
|  | Homemaker | 6.93 | (6.68,7.19) | 0.13 |  | 7.65 | (7.39,7.92) | 0.13 |  | 7.72 | (7.49,7.95) | 0.12 |  |
|  | None of these/Other | 6.57 | (6.04,7.11) | 0.27 |  | 7.10 | (6.64,7.56) | 0.23 |  | 7.34 | (6.94,7.74) | 0.20 |  |
|  | Retired | 6.90 | (6.67,7.13) | 0.12 |  | 7.53 | (7.30,7.76) | 0.12 |  | 7.32 | (7.09,7.55) | 0.12 |  |
|  | Self-employed | 6.84 | (6.71,6.98) | 0.07 |  | 7.48 | (7.33,7.62) | 0.07 |  | 7.55 | (7.41,7.68) | 0.07 |  |
|  | Student | 6.81 | (6.56,7.06) | 0.13 |  | 7.06 | (6.80,7.32) | 0.13 |  | 7.10 | (6.82,7.37) | 0.14 |  |
|  | Unemployed and looking for a job | 6.44 | (6.18,6.71) | 0.13 |  | 6.94 | (6.66,7.23) | 0.15 |  | 7.22 | (6.97,7.46) | 0.13 |  |
| Religious service attendance | A few times a year | 6.88 | (6.76,7.00) | 0.06 | < .001 | 7.40 | (7.27,7.53) | 0.07 | < .001 | 7.53 | (7.41,7.65) | 0.06 | < .001 |
|  | More than once a week | 7.51 | (7.22,7.79) | 0.14 |  | 8.60 | (8.39,8.81) | 0.11 |  | 8.55 | (8.33,8.76) | 0.11 |  |
|  | Never | 6.63 | (6.53,6.74) | 0.05 |  | 7.09 | (6.98,7.20) | 0.06 |  | 7.18 | (7.08,7.28) | 0.05 |  |
|  | Once a week | 7.28 | (7.07,7.49) | 0.11 |  | 7.73 | (7.49,7.96) | 0.12 |  | 7.80 | (7.59,8.02) | 0.11 |  |
|  | One to three times a month | 7.00 | (6.75,7.26) | 0.13 |  | 7.42 | (7.14,7.70) | 0.14 |  | 7.47 | (7.22,7.72) | 0.13 |  |
| Education | Up to 8 years | 6.94 | (6.78,7.10) | 0.08 | 0.005 | 7.73 | (7.56,7.89) | 0.08 | < .001 | 7.71 | (7.55,7.87) | 0.08 | < .001 |
|  | 16+ years | 7.06 | (6.92,7.21) | 0.07 |  | 7.30 | (7.13,7.47) | 0.09 |  | 7.35 | (7.19,7.51) | 0.08 |  |
|  | 9 to 15 years | 6.81 | (6.73,6.88) | 0.04 |  | 7.23 | (7.15,7.31) | 0.04 |  | 7.37 | (7.30,7.44) | 0.04 |  |
| Immigration status | Born in another country | 6.91 | (6.54,7.27) | 0.19 | 0.866 | 7.53 | (7.16,7.90) | 0.19 | 0.461 | 7.45 | (7.12,7.77) | 0.16 | 0.819 |
|  | Born in this country | 6.87 | (6.80,6.94) | 0.04 |  | 7.39 | (7.32,7.47) | 0.04 |  | 7.48 | (7.41,7.56) | 0.04 |  |
| Religious affiliation | Buddhism | 6.93 | (6.31,7.54) | 0.29 | < .001 | 7.18 | (6.61,7.74) | 0.27 | < .001 | 7.44 | (6.89,8.00) | 0.27 | < .001 |
|  | Christianity | 6.93 | (6.85,7.02) | 0.04 |  | 7.53 | (7.44,7.62) | 0.04 |  | 7.60 | (7.52,7.68) | 0.04 |  |
|  | Confucianism | 0.00 | * | * |  | 6.00 | * | * |  | 6.00 | * | * |  |
|  | Hinduism | 7.83 | * | * |  | 5.35 | * | * |  | 6.94 | * | * |  |
|  | Islam | 7.80 | (4.99,10.62) | 1.23 |  | 8.39 | (5.83,10.95) | 1.11 |  | 8.98 | (7.73,10.23) | 0.54 |  |
|  | Judaism | 7.48 | (6.72,8.23) | 0.37 |  | 7.43 | (6.67,8.18) | 0.37 |  | 7.28 | (6.47,8.10) | 0.40 |  |
|  | No religion/Atheist/Agnostic | 6.64 | (6.50,6.79) | 0.07 |  | 6.93 | (6.78,7.08) | 0.08 |  | 7.01 | (6.85,7.16) | 0.08 |  |
|  | Primal, Animist, or Folk religion | 7.10 | (5.14,9.07) | 0.78 |  | 7.13 | (4.86,9.41) | 0.91 |  | 8.25 | (6.45,10.05) | 0.72 |  |
|  | Sikhism | 8.00 | * | * |  | 8.00 | * | * |  | 9.00 | * | * |  |
|  | Some other religion | 6.72 | (6.23,7.20) | 0.25 |  | 7.42 | (6.84,7.99) | 0.29 |  | 7.90 | (7.44,8.35) | 0.23 |  |
|  | Taoism | 7.21 | * | * |  | 7.42 | * | * |  | 7.33 | * | * |  |

Table S2f. Complete-case supplemental analysis of childhood predictors regression analysis results for Argentina

|  | | Life Evaluation | | | | Life Satisfaction | | | | Happiness | | | |
| --- | --- | --- | --- | --- | --- | --- | --- | --- | --- | --- | --- | --- | --- |
| Variable | Category | Est | 95% CI | SE | Global p-value | Est | 95% CI | SE | Global p-value | Est | 95% CI | SE | Global p-value |
| Relationship with mother | (Ref: Very bad/somewhat bad) |  |  |  | 0.268 |  |  |  | 0.011 |  |  |  | <.001 |
|  | Very good/somewhat good | 0.17 | (-0.13,0.46) | 0.15 |  | 0.40 | (0.09,0.71) | 0.16 |  | 0.52 | (0.25,0.80) | 0.14 |  |
| Relationship with father | (Ref: Very bad/somewhat bad) |  |  |  | 0.387 |  |  |  | 0.198 |  |  |  | 0.626 |
|  | Very good/somewhat good | 0.10 | (-0.12,0.31) | 0.11 |  | 0.15 | (-0.08,0.38) | 0.12 |  | 0.06 | (-0.17,0.28) | 0.12 |  |
| Parent marital status | (Ref: Parents married) |  |  |  | 0.250 |  |  |  | 0.208 |  |  |  | 0.188 |
|  | No, one or both of them had died | -0.08 | (-0.48,0.32) | 0.20 |  | 0.31 | (-0.09,0.71) | 0.20 |  | 0.13 | (-0.28,0.55) | 0.21 |  |
|  | No, they were never married | 0.22 | (-0.04,0.48) | 0.13 |  | 0.29 | (0.00,0.58) | 0.15 |  | 0.28 | (0.03,0.53) | 0.13 |  |
|  | Yes, married | 0.10 | (-0.13,0.34) | 0.12 |  | 0.18 | (-0.08,0.45) | 0.13 |  | 0.20 | (-0.03,0.44) | 0.12 |  |
| Subjective financial status of family growing up | (Ref: Got by) |  |  |  | <.001 |  |  |  | <.001 |  |  |  | <.001 |
|  | Found it difficult | -0.09 | (-0.26,0.09) | 0.09 |  | -0.19 | (-0.37,0.00) | 0.10 |  | -0.12 | (-0.29,0.05) | 0.09 |  |
|  | Found it very difficult | -0.40 | (-0.70,-0.09) | 0.16 |  | 0.29 | (-0.04,0.61) | 0.17 |  | 0.10 | (-0.23,0.43) | 0.17 |  |
|  | Lived comfortably | 0.37 | (0.21,0.53) | 0.08 |  | 0.32 | (0.15,0.48) | 0.09 |  | 0.26 | (0.11,0.41) | 0.08 |  |
| Abuse | (Ref: No) |  |  |  | 0.009 |  |  |  | <.001 |  |  |  | <.001 |
|  | Yes | -0.25 | (-0.44,-0.06) | 0.09 |  | -0.47 | (-0.67,-0.26) | 0.10 |  | -0.34 | (-0.52,-0.15) | 0.10 |  |
| Outsider growing up | (Ref: No) |  |  |  | 0.047 |  |  |  | 0.069 |  |  |  | 0.025 |
|  | Yes | -0.23 | (-0.45,-0.00) | 0.11 |  | -0.22 | (-0.46,0.02) | 0.12 |  | -0.26 | (-0.48,-0.03) | 0.11 |  |
| Self-rated health growing up | (Ref: Good) |  |  |  | <.001 |  |  |  | <.001 |  |  |  | <.001 |
|  | Excellent | 0.35 | (0.17,0.53) | 0.09 |  | 0.34 | (0.15,0.54) | 0.10 |  | 0.45 | (0.26,0.63) | 0.09 |  |
|  | Fair | -0.02 | (-0.31,0.26) | 0.14 |  | 0.01 | (-0.34,0.35) | 0.18 |  | 0.00 | (-0.31,0.32) | 0.16 |  |
|  | Poor | 0.01 | (-0.62,0.65) | 0.32 |  | -0.45 | (-1.17,0.28) | 0.37 |  | -0.14 | (-0.80,0.53) | 0.34 |  |
|  | Very good | 0.09 | (-0.09,0.28) | 0.09 |  | -0.01 | (-0.20,0.19) | 0.10 |  | 0.04 | (-0.14,0.22) | 0.09 |  |
| Immigration status | (Ref: Born in this country) |  |  |  | 0.849 |  |  |  | 0.479 |  |  |  | 0.932 |
|  | Born in another country | 0.04 | (-0.33,0.40) | 0.19 |  | 0.13 | (-0.23,0.49) | 0.18 |  | -0.01 | (-0.32,0.29) | 0.16 |  |
| Age 12 religious service attendance | (Ref: Never) |  |  |  | 0.373 |  |  |  | 0.035 |  |  |  | 0.011 |
|  | At least once a week | 0.12 | (-0.07,0.31) | 0.10 |  | 0.12 | (-0.08,0.32) | 0.10 |  | 0.21 | (0.02,0.39) | 0.09 |  |
|  | Less than once a month | -0.02 | (-0.23,0.19) | 0.11 |  | -0.11 | (-0.34,0.11) | 0.12 |  | -0.08 | (-0.29,0.13) | 0.11 |  |
|  | One to three times a month | -0.01 | (-0.23,0.22) | 0.11 |  | -0.14 | (-0.37,0.09) | 0.12 |  | 0.02 | (-0.19,0.23) | 0.11 |  |
| Year of birth | (Ref: 1998-2005; current age: 18-24) |  |  |  | 0.748 |  |  |  | <.001 |  |  |  | 0.019 |
|  | 1993-1998; age 25-29 | 0.12 | (-0.15,0.39) | 0.14 |  | 0.23 | (-0.06,0.53) | 0.15 |  | 0.16 | (-0.09,0.42) | 0.13 |  |
|  | 1983-1993; age 30-39 | 0.01 | (-0.21,0.23) | 0.11 |  | 0.11 | (-0.14,0.37) | 0.13 |  | 0.15 | (-0.07,0.38) | 0.11 |  |
|  | 1973-1983; age 40-49 | 0.13 | (-0.10,0.35) | 0.11 |  | 0.46 | (0.20,0.73) | 0.14 |  | 0.39 | (0.17,0.61) | 0.11 |  |
|  | 1963-1973; age 50-59 | -0.05 | (-0.30,0.20) | 0.13 |  | 0.48 | (0.21,0.75) | 0.14 |  | 0.25 | (0.02,0.48) | 0.12 |  |
|  | 1953-1963; age 60-69 | 0.00 | (-0.28,0.28) | 0.14 |  | 0.29 | (-0.02,0.61) | 0.16 |  | 0.05 | (-0.23,0.33) | 0.14 |  |
|  | 1943-1953; age 70-79 | -0.06 | (-0.45,0.34) | 0.20 |  | 0.27 | (-0.14,0.69) | 0.21 |  | 0.08 | (-0.29,0.44) | 0.19 |  |
|  | 1943 or earlier; age 80+ | 0.30 | (-0.33,0.93) | 0.32 |  | 0.82 | (0.28,1.36) | 0.27 |  | -0.15 | (-0.71,0.42) | 0.29 |  |
| Gender | (Ref: Male) |  |  |  | 0.062 |  |  |  | 0.210 |  |  |  | 0.371 |
|  | Male | -0.12 | (-0.26,0.01) | 0.07 |  | -0.10 | (-0.25,0.05) | 0.08 |  | -0.09 | (-0.23,0.05) | 0.07 |  |
|  | Other | -0.95 | (-2.07,0.17) | 0.57 |  | -0.67 | (-1.80,0.45) | 0.57 |  | -0.37 | (-1.71,0.97) | 0.68 |  |
| Religious affiliation | (Ref: No religion/Atheist/Agnostic) |  |  |  | 0.543 |  |  |  | 0.987 |  |  |  | 0.814 |
|  | Christianity | -0.02 | (-0.26,0.21) | 0.12 |  | -0.01 | (-0.27,0.25) | 0.13 |  | 0.05 | (-0.18,0.29) | 0.12 |  |
|  | Christianity | -0.02 | (-0.26,0.21) | 0.12 |  | -0.01 | (-0.27,0.25) | 0.13 |  | 0.05 | (-0.18,0.29) | 0.12 |  |
|  | Collapsed affiliations with prevalence<3% | 0.26 | (-0.29,0.81) | 0.28 |  | -0.04 | (-0.59,0.50) | 0.28 |  | 0.17 | (-0.37,0.70) | 0.27 |  |
| Race/ethnicity | (Ref: Plurality group) |  |  |  | 0.148 |  |  |  | <.001 |  |  |  | 0.059 |
|  | Non-plurality groups | 0.11 | (-0.04,0.25) | 0.07 |  | 0.25 | (0.10,0.40) | 0.08 |  | 0.13 | (-0.00,0.27) | 0.07 |  |

Table S2g. Complete-case supplemental analysis of sensitivity to unmeasured confounding of childhood predictors in Argentina

|  | | Life Evaluation | | Life Satisfaction | | Happiness | |
| --- | --- | --- | --- | --- | --- | --- | --- |
| Variable | Category | E-value for Estimate | E-value for 95% CI | E-value for Estimate | E-value for 95% CI | E-value for Estimate | E-value for 95% CI |
| Relationship with mother | (Ref: Very bad/somewhat bad) |  |  |  |  |  |  |
|  | Very good/somewhat good | 1.37 | 1.00 | 1.67 | 1.25 | 1.88 | 1.49 |
| Relationship with father | (Ref: Very bad/somewhat bad) |  |  |  |  |  |  |
|  | Very good/somewhat good | 1.26 | 1.00 | 1.33 | 1.00 | 1.19 | 1.00 |
| Parent marital status | (Ref: Parents married) |  |  |  |  |  |  |
|  | No, one or both of them had died | 1.23 | 1.00 | 1.55 | 1.00 | 1.33 | 1.00 |
|  | No, they were never married | 1.44 | 1.00 | 1.53 | 1.05 | 1.54 | 1.12 |
|  | Yes, married | 1.27 | 1.00 | 1.38 | 1.00 | 1.43 | 1.00 |
| Subjective financial status of family growing up | (Ref: Got by) |  |  |  |  |  |  |
|  | Found it difficult | 1.24 | 1.00 | 1.38 | 1.00 | 1.31 | 1.00 |
|  | Found it very difficult | 1.69 | 1.25 | 1.52 | 1.00 | 1.27 | 1.00 |
|  | Lived comfortably | 1.65 | 1.43 | 1.56 | 1.33 | 1.51 | 1.29 |
| Abuse | (Ref: No) |  |  |  |  |  |  |
|  | Yes | 1.49 | 1.20 | 1.75 | 1.49 | 1.62 | 1.35 |
| Outsider growing up | (Ref: No) |  |  |  |  |  |  |
|  | Yes | 1.45 | 1.04 | 1.43 | 1.00 | 1.51 | 1.14 |
| Self-rated health growing up | (Ref: Good) |  |  |  |  |  |  |
|  | Excellent | 1.63 | 1.38 | 1.59 | 1.34 | 1.77 | 1.52 |
|  | Fair | 1.11 | 1.00 | 1.05 | 1.00 | 1.04 | 1.00 |
|  | Poor | 1.08 | 1.00 | 1.72 | 1.00 | 1.33 | 1.00 |
|  | Very good | 1.25 | 1.00 | 1.05 | 1.00 | 1.15 | 1.00 |
| Immigration status | (Ref: Born in this country) |  |  |  |  |  |  |
|  | Born in another country | 1.15 | 1.00 | 1.31 | 1.00 | 1.09 | 1.00 |
| Age 12 religious service attendance | (Ref: Never) |  |  |  |  |  |  |
|  | At least once a week | 1.30 | 1.00 | 1.29 | 1.00 | 1.44 | 1.12 |
|  | Less than once a month | 1.11 | 1.00 | 1.28 | 1.00 | 1.24 | 1.00 |
|  | One to three times a month | 1.05 | 1.00 | 1.32 | 1.00 | 1.11 | 1.00 |
| Year of birth | (Ref: 1998-2005; current age: 18-24) |  |  |  |  |  |  |
|  | 1993-1998; age 25-29 | 1.30 | 1.00 | 1.45 | 1.00 | 1.37 | 1.00 |
|  | 1983-1993; age 30-39 | 1.07 | 1.00 | 1.28 | 1.00 | 1.36 | 1.00 |
|  | 1973-1983; age 40-49 | 1.31 | 1.00 | 1.74 | 1.40 | 1.70 | 1.38 |
|  | 1963-1973; age 50-59 | 1.18 | 1.00 | 1.76 | 1.42 | 1.50 | 1.10 |
|  | 1953-1963; age 60-69 | 1.01 | 1.00 | 1.53 | 1.00 | 1.17 | 1.00 |
|  | 1943-1953; age 70-79 | 1.19 | 1.00 | 1.50 | 1.00 | 1.23 | 1.00 |
|  | 1943 or earlier; age 80+ | 1.55 | 1.00 | 2.20 | 1.51 | 1.35 | 1.00 |
| Gender | (Ref: Male) |  |  |  |  |  |  |
|  | Male | 1.31 | 1.00 | 1.26 | 1.00 | 1.26 | 1.00 |
|  | Other | 2.46 | 1.00 | 2.01 | 1.00 | 1.67 | 1.00 |
| Religious affiliation | (Ref: No religion/Atheist/Agnostic) |  |  |  |  |  |  |
|  | Christianity | 1.12 | 1.00 | 1.08 | 1.00 | 1.18 | 1.00 |
|  | Christianity | 1.12 | 1.00 | 1.08 | 1.00 | 1.18 | 1.00 |
|  | Collapsed affiliations with prevalence<3% | 1.50 | 1.00 | 1.16 | 1.00 | 1.38 | 1.00 |
| Race/ethnicity | (Ref: Plurality group) |  |  |  |  |  |  |
|  | Non-plurality groups | 1.28 | 1.00 | 1.47 | 1.26 | 1.33 | 1.00 |

# Tables S3a-g: Australia

Table S3a. Nationally representative descriptive statistics for Australia

| **Characteristic** | **N = 3,844**1 |
| --- | --- |
| **Age group** |  |
| 1998-2005; age 18-24 | 345 (9.0%) |
| 1993-1998; age 25-29 | 282 (7.3%) |
| 1983-1993; age 30-39 | 641 (17%) |
| 1973-1983; age 40-49 | 618 (16%) |
| 1963-1973; age 50-59 | 691 (18%) |
| 1953-1963; age 60-69 | 589 (15%) |
| 1943-1953; age 70-79 | 498 (13%) |
| 1943 or earlier; age 80+ | 178 (4.6%) |
| (Missing) | 2 (<0.1%) |
| **Gender** |  |
| Male | 1,861 (48%) |
| Female | 1,941 (50%) |
| Other | 36 (0.9%) |
| (Missing) | 6 (0.2%) |
| **Race/Ethnicity** |  |
| Aboriginal | 53 (1.4%) |
| Australian | 1,946 (51%) |
| Australian British/European | 1,047 (27%) |
| Chinese | 75 (1.9%) |
| Indian | 58 (1.5%) |
| Japanese | 1 (<0.1%) |
| Malay | 11 (0.3%) |
| New Zealander | 91 (2.4%) |
| Other | 163 (4.2%) |
| Other European | 357 (9.3%) |
| Russian | 7 (0.2%) |
| Samoan | 4 (0.1%) |
| Sinhalese | 1 (<0.1%) |
| Spanish | 2 (<0.1%) |
| Sri Lankan Moor | 1 (<0.1%) |
| Sri Lankan Tamil | 7 (0.2%) |
| Vietnamese | 7 (0.2%) |
| (Missing) | 14 (0.4%) |
| **Respondent Marital status** |  |
| Married | 1,797 (47%) |
| Separated | 158 (4.1%) |
| Divorced | 332 (8.6%) |
| Widowed | 215 (5.6%) |
| Single, never married | 855 (22%) |
| Domestic Partner | 450 (12%) |
| (Missing) | 38 (1.0%) |
| **Employment** |  |
| Employed for an employer | 1,881 (49%) |
| Self-employed | 380 (9.9%) |
| Retired | 912 (24%) |
| Student | 190 (5.0%) |
| Homemaker | 137 (3.6%) |
| Unemployed and looking for a job | 134 (3.5%) |
| None of these/Other | 206 (5.4%) |
| (Missing) | 4 (0.1%) |
| **Religious service attendance as an adult (now)** |  |
| More than 1/week | 162 (4.2%) |
| 1/week | 299 (7.8%) |
| 1-3/month | 135 (3.5%) |
| A few times a year | 656 (17%) |
| Never | 2,584 (67%) |
| (Missing) | 7 (0.2%) |
| **Education (years)** |  |
| Up to 8 years | 70 (1.8%) |
| 9-15 years | 2,434 (63%) |
| 16+ years | 1,330 (35%) |
| (Missing) | 10 (0.3%) |
| **Immigration status** |  |
| Born in this country | 2,953 (77%) |
| Born in another country | 885 (23%) |
| (Missing) | 6 (0.2%) |
| **Religious affiliation as an adult (now)** |  |
| Christianity | 1,592 (41%) |
| Islam | 45 (1.2%) |
| Hinduism | 31 (0.8%) |
| Buddhism | 36 (0.9%) |
| Judaism | 26 (0.7%) |
| Sikhism | 8 (0.2%) |
| Baha'i | 7 (0.2%) |
| Jainism | 0 (0%) |
| Shinto | 0 (0%) |
| Taoism | 5 (0.1%) |
| Confucianism | 0 (0%) |
| Primal, Animist, or Folk religion | 23 (0.6%) |
| Spiritism | 0 (0%) |
| Umbanda, Candomble, and other African-derived religions | 0 (0%) |
| Chinese folk/traditional religion | 0 (0%) |
| Some other religion | 39 (1.0%) |
| No religion/Atheist/Agnostic | 2,020 (53%) |
| (Missing) | 15 (0.4%) |
| **Relationship with mother growing up** |  |
| Very good | 2,554 (66%) |
| Somewhat good | 925 (24%) |
| Somewhat bad | 218 (5.7%) |
| Very bad | 107 (2.8%) |
| Does not apply | 32 (0.8%) |
| (Missing) | 7 (0.2%) |
| **Relationship with father growing up** |  |
| Very good | 2,032 (53%) |
| Somewhat good | 1,144 (30%) |
| Somewhat bad | 315 (8.2%) |
| Very bad | 196 (5.1%) |
| Does not apply | 148 (3.9%) |
| (Missing) | 9 (0.2%) |
| **Parent marital status at age 12** |  |
| Parents married | 3,048 (79%) |
| Divorced | 462 (12%) |
| Parents were never married | 187 (4.9%) |
| One or both parents had died | 96 (2.5%) |
| (Missing) | 52 (1.4%) |
| **Subjective financial status of family growing up** |  |
| Lived comfortably | 1,756 (46%) |
| Got by | 1,496 (39%) |
| Found it difficult | 422 (11%) |
| Found it very difficult | 154 (4.0%) |
| (Missing) | 16 (0.4%) |
| **Abuse** |  |
| Yes | 995 (26%) |
| No | 2,790 (73%) |
| (Missing) | 59 (1.5%) |
| **Outsider growing up** |  |
| Yes | 756 (20%) |
| No | 3,062 (80%) |
| (Missing) | 26 (0.7%) |
| **Self-rated health growing up** |  |
| Excellent | 1,736 (45%) |
| Very good | 1,087 (28%) |
| Good | 603 (16%) |
| Fair | 308 (8.0%) |
| Poor | 106 (2.8%) |
| (Missing) | 4 (<0.1%) |
| **Age 12 religious service attendance** |  |
| At least 1/week | 1,362 (35%) |
| 1-3/month | 486 (13%) |
| <1/month | 600 (16%) |
| Never | 1,307 (34%) |
| (Missing) | 90 (2.3%) |
| **Religious affiliation at age 12** |  |
| Christianity | 2,678 (70%) |
| Islam | 48 (1.2%) |
| Hinduism | 39 (1.0%) |
| Buddhism | 16 (0.4%) |
| Judaism | 29 (0.8%) |
| Sikhism | 6 (0.2%) |
| Baha'i | 5 (0.1%) |
| Jainism | 0 (0%) |
| Shinto | 0 (0%) |
| Taoism | 1 (<0.1%) |
| Confucianism | 0 (0%) |
| Primal, Animist, or Folk religion | 4 (<0.1%) |
| Spiritism | 0 (0%) |
| Umbanda, Candomble, and other African-derived religions | 0 (0%) |
| Chinese folk/traditional religion | 0 (0%) |
| Some other religion | 8 (0.2%) |
| No religion/Atheist/Agnostic | 990 (26%) |
| (Missing) | 21 (0.5%) |
| 1n (%) | |

Table S3b. Means by demographic category for Australia

|  | | Life Evaluation | | | | Life Satisfaction | | | | Happiness | | | |
| --- | --- | --- | --- | --- | --- | --- | --- | --- | --- | --- | --- | --- | --- |
| Variable | Category | Mean | 95% CI | SE | Global p-value | Mean | 95% CI | SE | Global p-value | Mean | 95% CI | SE | Global p-value |
| Age group | 18-24 | 6.09 | (5.82,6.35) | 0.14 | < .001 | 5.88 | (5.53,6.23) | 0.18 | < .001 | 6.13 | (5.84,6.42) | 0.15 | < .001 |
|  | 25-29 | 6.32 | (6.04,6.61) | 0.15 |  | 6.05 | (5.69,6.40) | 0.18 |  | 6.30 | (6.00,6.61) | 0.15 |  |
|  | 30-39 | 6.65 | (6.47,6.84) | 0.09 |  | 6.39 | (6.14,6.63) | 0.12 |  | 6.56 | (6.35,6.76) | 0.11 |  |
|  | 40-49 | 6.65 | (6.47,6.84) | 0.09 |  | 6.63 | (6.41,6.84) | 0.11 |  | 6.78 | (6.61,6.95) | 0.09 |  |
|  | 50-59 | 6.58 | (6.41,6.75) | 0.09 |  | 6.52 | (6.33,6.72) | 0.10 |  | 6.64 | (6.46,6.82) | 0.09 |  |
|  | 60-69 | 7.04 | (6.90,7.19) | 0.07 |  | 7.08 | (6.91,7.25) | 0.09 |  | 7.25 | (7.11,7.39) | 0.07 |  |
|  | 70-79 | 7.52 | (7.36,7.69) | 0.09 |  | 7.66 | (7.47,7.85) | 0.10 |  | 7.74 | (7.57,7.91) | 0.09 |  |
|  | 80 or older | 7.67 | (7.36,7.98) | 0.16 |  | 7.91 | (7.68,8.15) | 0.12 |  | 8.07 | (7.86,8.28) | 0.11 |  |
| Gender | Male | 6.81 | (6.71,6.91) | 0.05 | 0.142 | 6.68 | (6.55,6.81) | 0.06 | 0.009 | 6.86 | (6.75,6.97) | 0.05 | 0.004 |
|  | Female | 6.77 | (6.67,6.88) | 0.05 |  | 6.78 | (6.66,6.91) | 0.06 |  | 6.92 | (6.82,7.03) | 0.05 |  |
|  | Other | 6.19 | (5.55,6.83) | 0.31 |  | 5.29 | (4.25,6.32) | 0.51 |  | 5.66 | (4.87,6.45) | 0.39 |  |
| Marital status | Married | 7.29 | (7.21,7.38) | 0.04 | < .001 | 7.35 | (7.25,7.44) | 0.05 | < .001 | 7.37 | (7.29,7.46) | 0.04 | < .001 |
|  | Separated | 5.75 | (5.30,6.21) | 0.23 |  | 5.53 | (5.03,6.03) | 0.25 |  | 6.01 | (5.55,6.47) | 0.23 |  |
|  | Divorced | 6.44 | (6.19,6.68) | 0.12 |  | 6.45 | (6.17,6.73) | 0.14 |  | 6.68 | (6.44,6.91) | 0.12 |  |
|  | Widowed | 7.31 | (7.04,7.58) | 0.14 |  | 7.43 | (7.14,7.72) | 0.15 |  | 7.57 | (7.32,7.82) | 0.13 |  |
|  | Never | 6.04 | (5.86,6.21) | 0.09 |  | 5.66 | (5.45,5.88) | 0.11 |  | 6.05 | (5.87,6.24) | 0.09 |  |
|  | Domestic Partner | 6.54 | (6.32,6.76) | 0.11 |  | 6.51 | (6.23,6.78) | 0.14 |  | 6.63 | (6.39,6.86) | 0.12 |  |
| Employment | Employed for an employer | 6.74 | (6.65,6.83) | 0.05 | < .001 | 6.66 | (6.55,6.77) | 0.06 | < .001 | 6.80 | (6.70,6.89) | 0.05 | < .001 |
|  | Self-employed | 6.99 | (6.76,7.22) | 0.12 |  | 6.98 | (6.72,7.23) | 0.13 |  | 7.11 | (6.90,7.32) | 0.11 |  |
|  | Retired | 7.36 | (7.23,7.50) | 0.07 |  | 7.49 | (7.34,7.64) | 0.08 |  | 7.61 | (7.48,7.74) | 0.07 |  |
|  | Student | 6.26 | (5.92,6.61) | 0.17 |  | 6.06 | (5.60,6.52) | 0.23 |  | 6.17 | (5.80,6.54) | 0.19 |  |
|  | Homemaker | 6.59 | (6.13,7.04) | 0.23 |  | 6.62 | (6.14,7.11) | 0.24 |  | 6.71 | (6.27,7.16) | 0.22 |  |
|  | Unemployed and looking for a job | 5.54 | (4.99,6.08) | 0.28 |  | 5.02 | (4.38,5.65) | 0.32 |  | 5.71 | (5.16,6.26) | 0.28 |  |
|  | None of these/Other | 5.67 | (5.26,6.07) | 0.21 |  | 5.14 | (4.61,5.68) | 0.27 |  | 5.54 | (5.06,6.01) | 0.24 |  |
| Religious service attendance | More than 1/week | 7.72 | (7.41,8.03) | 0.16 | < .001 | 7.77 | (7.40,8.15) | 0.19 | < .001 | 7.78 | (7.45,8.12) | 0.17 | < .001 |
|  | 1/week | 7.17 | (6.94,7.41) | 0.12 |  | 7.21 | (6.91,7.51) | 0.15 |  | 7.24 | (6.99,7.49) | 0.13 |  |
|  | 1-3/month | 6.98 | (6.67,7.28) | 0.15 |  | 6.77 | (6.36,7.18) | 0.21 |  | 6.92 | (6.58,7.25) | 0.17 |  |
|  | A few times a year | 6.79 | (6.62,6.96) | 0.09 |  | 6.77 | (6.57,6.97) | 0.10 |  | 7.04 | (6.88,7.20) | 0.08 |  |
|  | Never | 6.67 | (6.58,6.76) | 0.05 |  | 6.58 | (6.47,6.69) | 0.06 |  | 6.74 | (6.65,6.84) | 0.05 |  |
| Education | Up to 8 years | 7.40 | (6.50,8.30) | 0.45 | < .001 | 7.46 | (6.64,8.28) | 0.41 | < .001 | 7.98 | (7.31,8.64) | 0.33 | < .001 |
|  | 9-15 years | 6.64 | (6.54,6.75) | 0.05 |  | 6.58 | (6.45,6.70) | 0.06 |  | 6.79 | (6.69,6.90) | 0.05 |  |
|  | 16+ years | 7.01 | (6.93,7.09) | 0.04 |  | 6.94 | (6.84,7.04) | 0.05 |  | 6.99 | (6.90,7.08) | 0.05 |  |
| Immigration status | Born in this country | 6.73 | (6.65,6.82) | 0.04 | 0.009 | 6.66 | (6.55,6.76) | 0.05 | 0.006 | 6.83 | (6.74,6.92) | 0.05 | 0.008 |
|  | Born in another country | 6.95 | (6.81,7.09) | 0.07 |  | 6.93 | (6.76,7.10) | 0.09 |  | 7.06 | (6.91,7.20) | 0.07 |  |
| Religious affiliation | Christianity | 7.05 | (6.95,7.15) | 0.05 | < .001 | 7.02 | (6.90,7.15) | 0.07 | < .001 | 7.17 | (7.06,7.28) | 0.06 | < .001 |
|  | Islam | 6.34 | (5.35,7.33) | 0.49 |  | 6.39 | (5.13,7.65) | 0.62 |  | 6.38 | (5.39,7.37) | 0.49 |  |
|  | Hinduism | 6.29 | (5.18,7.41) | 0.53 |  | 6.45 | (5.42,7.49) | 0.50 |  | 6.85 | (6.08,7.62) | 0.37 |  |
|  | Buddhism | 6.80 | (6.25,7.34) | 0.26 |  | 7.18 | (6.50,7.85) | 0.33 |  | 7.22 | (6.66,7.77) | 0.27 |  |
|  | Judaism | 6.79 | (6.25,7.34) | 0.25 |  | 7.08 | (6.51,7.65) | 0.26 |  | 6.83 | (6.27,7.38) | 0.25 |  |
|  | Sikhism | 5.76 | * | * |  | 6.09 | * | * |  | 5.80 | * | * |  |
|  | Baha'i | 8.53 | * | * |  | 8.55 | * | * |  | 8.77 | * | * |  |
|  | Taoism | 7.02 | * | * |  | 6.97 | * | * |  | 7.20 | * | * |  |
|  | Primal, Animist, or Folk religion | 6.20 | (5.34,7.06) | 0.38 |  | 6.34 | (5.35,7.34) | 0.44 |  | 5.95 | (4.65,7.25) | 0.58 |  |
|  | Some other religion | 6.86 | (5.76,7.95) | 0.53 |  | 6.95 | (5.83,8.06) | 0.54 |  | 6.96 | (5.95,7.97) | 0.49 |  |
|  | No religion/Atheist/Agnostic | 6.59 | (6.49,6.70) | 0.05 |  | 6.48 | (6.35,6.60) | 0.06 |  | 6.66 | (6.56,6.77) | 0.05 |  |
| Race/Ethnicity | Aboriginal | 5.92 | (4.83,7.00) | 0.53 | < .001 | 5.96 | (4.68,7.25) | 0.63 | < .001 | 5.95 | (4.73,7.17) | 0.60 | < .001 |
|  | Australian | 6.77 | (6.67,6.88) | 0.05 |  | 6.80 | (6.68,6.92) | 0.06 |  | 6.94 | (6.83,7.05) | 0.05 |  |
|  | Australian British/European | 6.84 | (6.71,6.97) | 0.07 |  | 6.60 | (6.43,6.77) | 0.09 |  | 6.82 | (6.68,6.96) | 0.07 |  |
|  | Chinese | 6.66 | (6.29,7.02) | 0.18 |  | 6.46 | (5.89,7.03) | 0.29 |  | 6.83 | (6.41,7.26) | 0.21 |  |
|  | Indian | 6.71 | (5.97,7.44) | 0.36 |  | 6.76 | (5.97,7.55) | 0.39 |  | 6.75 | (6.21,7.30) | 0.27 |  |
|  | Japanese | 7.91 | * | * |  | 7.54 | * | * |  | 8.00 | * | * |  |
|  | Malay | 7.28 | * | * |  | 7.42 | * | * |  | 7.56 | * | * |  |
|  | Sinhalese | 8.00 | * | * |  | 6.39 | * | * |  | 7.00 | * | * |  |
|  | Spanish | 6.80 | * | * |  | 7.19 | * | * |  | 7.54 | * | * |  |
|  | Sri Lankan Moor | 7.33 | * | * |  | 8.39 | * | * |  | 7.65 | * | * |  |
|  | Sri Lankan Tamil | 7.31 | * | * |  | 6.56 | * | * |  | 6.10 | * | * |  |
|  | Vietnamese | 7.56 | * | * |  | 7.59 | * | * |  | 6.77 | * | * |  |
|  | Russian | 7.05 | * | * |  | 7.41 | * | * |  | 7.54 | * | * |  |
|  | Samoan | 5.00 | * | * |  | 2.44 | * | * |  | 5.22 | * | * |  |
|  | New Zealander | 6.67 | (6.11,7.23) | 0.28 |  | 6.91 | (6.22,7.60) | 0.35 |  | 6.76 | (6.14,7.39) | 0.31 |  |
|  | Other European | 7.01 | (6.82,7.21) | 0.10 |  | 6.87 | (6.62,7.12) | 0.13 |  | 7.09 | (6.87,7.31) | 0.11 |  |
|  | Other | 6.43 | (6.03,6.83) | 0.20 |  | 6.45 | (6.02,6.87) | 0.22 |  | 6.56 | (6.19,6.93) | 0.19 |  |

Table S3c. Childhood predictors regression analysis results for Australia

|  | | Life Evaluation | | | | Life Satisfaction | | | | Happiness | | | |
| --- | --- | --- | --- | --- | --- | --- | --- | --- | --- | --- | --- | --- | --- |
| Variable | Category | Est | 95% CI | SE | Global p-value | Est | 95% CI | SE | Global p-value | Est | 95% CI | SE | Global p-value |
| Relationship with mother | (Ref: Very bad/somewhat bad) |  |  |  | 0.465 |  |  |  | 0.694 |  |  |  | 0.507 |
|  | Very good/somewhat good | 0.11 | (-0.19, 0.42) | 0.16 |  | -0.07 | (-0.44, 0.29) | 0.19 |  | 0.11 | (-0.22, 0.44) | 0.17 |  |
| Relationship with father | (Ref: Very bad/somewhat bad) |  |  |  | 0.519 |  |  |  | 0.629 |  |  |  | 0.322 |
|  | Very good/somewhat good | 0.09 | (-0.18, 0.35) | 0.13 |  | 0.06 | (-0.25, 0.38) | 0.16 |  | 0.13 | (-0.13, 0.40) | 0.13 |  |
| Parent marital status | (Ref: Parents married) |  |  |  | 0.551 |  |  |  | 0.188 |  |  |  | 0.515 |
|  | Divorced | 0.06 | (-0.19, 0.32) | 0.13 |  | -0.12 | (-0.42, 0.18) | 0.15 |  | 0.02 | (-0.25, 0.29) | 0.14 |  |
|  | Parents were never married | 0.22 | (-0.21, 0.64) | 0.22 |  | 0.39 | (-0.07, 0.86) | 0.23 |  | 0.20 | (-0.20, 0.60) | 0.20 |  |
|  | One or both parents had died | 0.23 | (-0.21, 0.66) | 0.22 |  | 0.20 | (-0.32, 0.71) | 0.26 |  | 0.25 | (-0.18, 0.67) | 0.22 |  |
| Subjective financial status of family growing up | (Ref: Got by) |  |  |  | 0.002 |  |  |  | 0.110 |  |  |  | 0.096 |
|  | Lived comfortably | 0.18 | (0.04, 0.33) | 0.07 |  | 0.13 | (-0.04, 0.31) | 0.09 |  | 0.15 | (-0.00, 0.29) | 0.08 |  |
|  | Found it difficult | 0.11 | (-0.13, 0.35) | 0.12 |  | 0.10 | (-0.18, 0.39) | 0.15 |  | 0.03 | (-0.22, 0.29) | 0.13 |  |
|  | Found it very difficult | -0.49 | (-0.89, -0.10) | 0.20 |  | -0.40 | (-0.90, 0.11) | 0.26 |  | -0.26 | (-0.69, 0.16) | 0.22 |  |
| Abuse | (Ref: No) |  |  |  | <.001 |  |  |  | <.001 |  |  |  | <.001 |
|  | Yes | -0.33 | (-0.52, -0.15) | 0.09 |  | -0.45 | (-0.67, -0.24) | 0.11 |  | -0.38 | (-0.57, -0.19) | 0.10 |  |
| Outsider growing up | (Ref: No) |  |  |  | <.001 |  |  |  | <.001 |  |  |  | <.001 |
|  | Yes | -0.72 | (-0.94, -0.50) | 0.11 |  | -0.88 | (-1.14, -0.62) | 0.13 |  | -0.61 | (-0.84, -0.39) | 0.11 |  |
| Self-rated health growing up | (Ref: Good) |  |  |  | <.001 |  |  |  | <.001 |  |  |  | <.001 |
|  | Excellent | 0.45 | (0.25, 0.65) | 0.10 |  | 0.67 | (0.42, 0.92) | 0.13 |  | 0.57 | (0.35, 0.78) | 0.11 |  |
|  | Very good | 0.08 | (-0.13, 0.30) | 0.11 |  | 0.21 | (-0.05, 0.47) | 0.13 |  | 0.16 | (-0.06, 0.39) | 0.11 |  |
|  | Fair | -0.27 | (-0.60, 0.06) | 0.17 |  | -0.34 | (-0.78, 0.09) | 0.22 |  | -0.17 | (-0.53, 0.19) | 0.18 |  |
|  | Poor | -0.43 | (-1.10, 0.23) | 0.34 |  | -0.33 | (-1.02, 0.35) | 0.35 |  | -0.41 | (-0.93, 0.11) | 0.27 |  |
| Immigration status | (Ref: Born in this country) |  |  |  | 0.422 |  |  |  | 0.068 |  |  |  | 0.090 |
|  | Born in another country | 0.07 | (-0.10, 0.25) | 0.09 |  | 0.19 | (-0.02, 0.40) | 0.11 |  | 0.16 | (-0.03, 0.34) | 0.09 |  |
| Age 12 religious service attendance | (Ref: Never) |  |  |  | 0.373 |  |  |  | 0.325 |  |  |  | 0.483 |
|  | At least 1/week | 0.16 | (-0.03, 0.35) | 0.10 |  | 0.16 | (-0.07, 0.40) | 0.12 |  | 0.14 | (-0.08, 0.35) | 0.11 |  |
|  | 1-3/month | 0.08 | (-0.14, 0.31) | 0.11 |  | -0.04 | (-0.33, 0.25) | 0.15 |  | 0.09 | (-0.16, 0.33) | 0.12 |  |
|  | < 1/month | 0.12 | (-0.11, 0.34) | 0.11 |  | 0.08 | (-0.19, 0.35) | 0.14 |  | 0.01 | (-0.22, 0.24) | 0.12 |  |
| Year of birth | (Ref: 1998-2005; current age: 18-24) |  |  |  | <.001 |  |  |  | <.001 |  |  |  | <.001 |
|  | 1993-1998; age 25-29 | 0.27 | (-0.10, 0.64) | 0.19 |  | 0.20 | (-0.26, 0.66) | 0.23 |  | 0.17 | (-0.23, 0.57) | 0.20 |  |
|  | 1983-1993; age 30-39 | 0.54 | (0.24, 0.85) | 0.15 |  | 0.47 | (0.07, 0.86) | 0.20 |  | 0.36 | (0.03, 0.69) | 0.17 |  |
|  | 1973-1983; age 40-49 | 0.50 | (0.19, 0.81) | 0.16 |  | 0.67 | (0.28, 1.06) | 0.20 |  | 0.54 | (0.22, 0.87) | 0.16 |  |
|  | 1963-1973; age 50-59 | 0.37 | (0.06, 0.68) | 0.16 |  | 0.46 | (0.08, 0.84) | 0.20 |  | 0.33 | (0.00, 0.66) | 0.17 |  |
|  | 1953-1963; age 60-69 | 0.80 | (0.50, 1.10) | 0.15 |  | 0.97 | (0.59, 1.35) | 0.19 |  | 0.91 | (0.59, 1.23) | 0.16 |  |
|  | 1943-1953; age 70-79 | 1.20 | (0.88, 1.51) | 0.16 |  | 1.44 | (1.04, 1.83) | 0.20 |  | 1.31 | (0.98, 1.65) | 0.17 |  |
|  | 1943 or earlier; age 80+ | 1.29 | (0.91, 1.67) | 0.19 |  | 1.67 | (1.27, 2.06) | 0.20 |  | 1.61 | (1.27, 1.94) | 0.17 |  |
| Gender | (Ref: Male) |  |  |  | 0.563 |  |  |  | 0.060 |  |  |  | 0.161 |
|  | Female | 0.03 | (-0.11, 0.17) | 0.07 |  | 0.19 | (0.02, 0.35) | 0.08 |  | 0.13 | (-0.02, 0.27) | 0.07 |  |
|  | Other | 0.30 | (-0.27, 0.88) | 0.29 |  | -0.28 | (-1.29, 0.74) | 0.52 |  | -0.19 | (-0.91, 0.53) | 0.37 |  |
| Religious affiliation | (Ref: No religion/Atheist/Agnostic) |  |  |  | 0.112 |  |  |  | 0.653 |  |  |  | 0.371 |
|  | Christianity | 0.15 | (-0.05, 0.34) | 0.10 |  | 0.09 | (-0.15, 0.32) | 0.12 |  | 0.07 | (-0.13, 0.28) | 0.10 |  |
|  | Collapsed affiliations with prevalence<3% | -0.17 | (-0.60, 0.25) | 0.22 |  | -0.07 | (-0.57, 0.43) | 0.25 |  | -0.19 | (-0.62, 0.24) | 0.22 |  |
| Race/ethnicity | (Ref: Plurality group) |  |  |  | 0.145 |  |  |  | 0.410 |  |  |  | 0.586 |
|  | Non-plurality groups | 0.11 | (-0.04, 0.26) | 0.08 |  | -0.07 | (-0.26, 0.12) | 0.10 |  | -0.04 | (-0.20, 0.13) | 0.08 |  |

Table S3d. Sensitivity to unmeasured confounding of childhood predictors in Australia

|  | | Life Evaluation | | Life Satisfaction | | Happiness | |
| --- | --- | --- | --- | --- | --- | --- | --- |
| Variable | Category | E-value for Estimate | E-value for 95% CI | E-value for Estimate | E-value for 95% CI | E-value for Estimate | E-value for 95% CI |
| Relationship with mother | (Ref: Very bad/somewhat bad) |  |  |  |  |  |  |
|  | Very good/somewhat good | 1.31 | 1.00 | 1.21 | 1.00 | 1.30 | 1.00 |
| Relationship with father | (Ref: Very bad/somewhat bad) |  |  |  |  |  |  |
|  | Very good/somewhat good | 1.26 | 1.00 | 1.20 | 1.00 | 1.34 | 1.00 |
| Parent marital status | (Ref: Parents married) |  |  |  |  |  |  |
|  | Divorced | 1.22 | 1.00 | 1.29 | 1.00 | 1.12 | 1.00 |
|  | Parents were never married | 1.48 | 1.00 | 1.66 | 1.00 | 1.45 | 1.00 |
|  | One or both parents had died | 1.49 | 1.00 | 1.40 | 1.00 | 1.52 | 1.00 |
| Subjective financial status of family growing up | (Ref: Got by) |  |  |  |  |  |  |
|  | Lived comfortably | 1.43 | 1.16 | 1.31 | 1.00 | 1.36 | 1.00 |
|  | Found it difficult | 1.31 | 1.00 | 1.26 | 1.00 | 1.15 | 1.00 |
|  | Found it very difficult | 1.90 | 1.28 | 1.66 | 1.00 | 1.54 | 1.00 |
| Abuse | (Ref: No) |  |  |  |  |  |  |
|  | Yes | 1.66 | 1.38 | 1.73 | 1.45 | 1.71 | 1.43 |
| Outsider growing up | (Ref: No) |  |  |  |  |  |  |
|  | Yes | 2.25 | 1.91 | 2.29 | 1.95 | 2.05 | 1.72 |
| Self-rated health growing up | (Ref: Good) |  |  |  |  |  |  |
|  | Excellent | 1.83 | 1.53 | 2.01 | 1.69 | 1.99 | 1.67 |
|  | Very good | 1.26 | 1.00 | 1.41 | 1.00 | 1.39 | 1.00 |
|  | Fair | 1.56 | 1.00 | 1.59 | 1.00 | 1.40 | 1.00 |
|  | Poor | 1.80 | 1.00 | 1.58 | 1.00 | 1.75 | 1.00 |
| Immigration status | (Ref: Born in this country) |  |  |  |  |  |  |
|  | Born in another country | 1.23 | 1.00 | 1.39 | 1.00 | 1.38 | 1.00 |
| Age 12 religious service attendance | (Ref: Never) |  |  |  |  |  |  |
|  | At least 1/week | 1.39 | 1.00 | 1.35 | 1.00 | 1.34 | 1.00 |
|  | 1-3/month | 1.26 | 1.00 | 1.15 | 1.00 | 1.26 | 1.00 |
|  | < 1/month | 1.32 | 1.00 | 1.23 | 1.00 | 1.08 | 1.00 |
| Year of birth | (Ref: 1998-2005; current age: 18-24) |  |  |  |  |  |  |
|  | 1993-1998; age 25-29 | 1.56 | 1.00 | 1.40 | 1.00 | 1.40 | 1.00 |
|  | 1983-1993; age 30-39 | 1.97 | 1.52 | 1.75 | 1.21 | 1.69 | 1.15 |
|  | 1973-1983; age 40-49 | 1.91 | 1.44 | 2.00 | 1.51 | 1.95 | 1.48 |
|  | 1963-1973; age 50-59 | 1.71 | 1.22 | 1.74 | 1.22 | 1.65 | 1.06 |
|  | 1953-1963; age 60-69 | 2.38 | 1.90 | 2.42 | 1.91 | 2.53 | 2.03 |
|  | 1943-1953; age 70-79 | 3.10 | 2.52 | 3.13 | 2.51 | 3.27 | 2.65 |
|  | 1943 or earlier; age 80+ | 3.28 | 2.56 | 3.53 | 2.86 | 3.90 | 3.19 |
| Gender | (Ref: Male) |  |  |  |  |  |  |
|  | Female | 1.14 | 1.00 | 1.39 | 1.11 | 1.33 | 1.00 |
|  | Other | 1.61 | 1.00 | 1.50 | 1.00 | 1.43 | 1.00 |
| Religious affiliation | (Ref: No religion/Atheist/Agnostic) |  |  |  |  |  |  |
|  | Christianity | 1.37 | 1.00 | 1.24 | 1.00 | 1.23 | 1.00 |
|  | Collapsed affiliations with prevalence<3% | 1.41 | 1.00 | 1.21 | 1.00 | 1.43 | 1.00 |
| Race/ethnicity | (Ref: Plurality group) |  |  |  |  |  |  |
|  | Non-plurality groups | 1.31 | 1.00 | 1.21 | 1.00 | 1.16 | 1.00 |

Table S3e. Complete-case supplemental analysis of means by demographic category for Australia

|  | | Life Evaluation | | | | Life Satisfaction | | | | Happiness | | | |
| --- | --- | --- | --- | --- | --- | --- | --- | --- | --- | --- | --- | --- | --- |
| Variable | Category | Mean | 95% CI | SE | Global p-value | Mean | 95% CI | SE | Global p-value | Mean | 95% CI | SE | Global p-value |
| Age group | 18-24 | 6.09 | (5.82,6.35) | 0.14 | < .001 | 5.91 | (5.57,6.25) | 0.17 | < .001 | 6.13 | (5.84,6.42) | 0.15 | < .001 |
|  | 25-29 | 6.32 | (6.04,6.61) | 0.15 |  | 6.21 | (5.90,6.52) | 0.16 |  | 6.34 | (6.04,6.64) | 0.15 |  |
|  | 30-39 | 6.68 | (6.50,6.86) | 0.09 |  | 6.50 | (6.28,6.73) | 0.11 |  | 6.60 | (6.41,6.80) | 0.10 |  |
|  | 40-49 | 6.70 | (6.53,6.88) | 0.09 |  | 6.71 | (6.50,6.91) | 0.10 |  | 6.81 | (6.64,6.97) | 0.08 |  |
|  | 50-59 | 6.63 | (6.46,6.79) | 0.08 |  | 6.70 | (6.55,6.86) | 0.08 |  | 6.74 | (6.57,6.90) | 0.08 |  |
|  | 60-69 | 7.06 | (6.91,7.20) | 0.07 |  | 7.16 | (7.01,7.32) | 0.08 |  | 7.26 | (7.12,7.40) | 0.07 |  |
|  | 70-79 | 7.55 | (7.39,7.72) | 0.08 |  | 7.67 | (7.48,7.86) | 0.10 |  | 7.75 | (7.58,7.92) | 0.09 |  |
|  | 80 or older | 7.67 | (7.36,7.99) | 0.16 |  | 7.93 | (7.70,8.16) | 0.12 |  | 8.07 | (7.86,8.29) | 0.11 |  |
| Gender | Female | 6.81 | (6.71,6.91) | 0.05 | 0.148 | 6.88 | (6.77,6.99) | 0.06 | 0.007 | 6.97 | (6.87,7.08) | 0.05 | 0.003 |
|  | Male | 6.83 | (6.72,6.93) | 0.05 |  | 6.79 | (6.67,6.90) | 0.06 |  | 6.88 | (6.78,6.99) | 0.05 |  |
|  | Other | 6.23 | (5.62,6.84) | 0.30 |  | 5.38 | (4.38,6.38) | 0.49 |  | 5.71 | (4.95,6.48) | 0.37 |  |
| Marital status | Divorced | 6.48 | (6.24,6.71) | 0.12 | < .001 | 6.59 | (6.33,6.84) | 0.13 | < .001 | 6.69 | (6.46,6.92) | 0.12 | < .001 |
|  | Domestic partner | 6.60 | (6.40,6.81) | 0.10 |  | 6.61 | (6.36,6.86) | 0.13 |  | 6.63 | (6.39,6.86) | 0.12 |  |
|  | Married | 7.30 | (7.22,7.39) | 0.04 |  | 7.35 | (7.25,7.44) | 0.05 |  | 7.38 | (7.29,7.46) | 0.04 |  |
|  | Separated | 5.90 | (5.47,6.32) | 0.21 |  | 5.94 | (5.52,6.36) | 0.21 |  | 6.28 | (5.89,6.66) | 0.19 |  |
|  | Single/Never been married | 6.05 | (5.88,6.22) | 0.09 |  | 5.87 | (5.68,6.06) | 0.10 |  | 6.14 | (5.96,6.31) | 0.09 |  |
|  | Widowed | 7.31 | (7.04,7.57) | 0.14 |  | 7.44 | (7.16,7.73) | 0.14 |  | 7.55 | (7.31,7.80) | 0.12 |  |
| Employment | Employed for an employer | 6.76 | (6.67,6.85) | 0.05 | < .001 | 6.71 | (6.60,6.81) | 0.05 | < .001 | 6.81 | (6.72,6.91) | 0.05 | < .001 |
|  | Homemaker | 6.58 | (6.12,7.03) | 0.23 |  | 6.62 | (6.14,7.11) | 0.24 |  | 6.71 | (6.27,7.16) | 0.22 |  |
|  | None of these/Other | 5.72 | (5.31,6.12) | 0.21 |  | 5.65 | (5.18,6.11) | 0.24 |  | 5.86 | (5.44,6.28) | 0.21 |  |
|  | Retired | 7.37 | (7.24,7.51) | 0.07 |  | 7.57 | (7.43,7.71) | 0.07 |  | 7.62 | (7.50,7.75) | 0.06 |  |
|  | Self-employed | 7.07 | (6.87,7.28) | 0.10 |  | 7.04 | (6.79,7.29) | 0.13 |  | 7.15 | (6.94,7.35) | 0.11 |  |
|  | Student | 6.27 | (5.92,6.61) | 0.17 |  | 6.24 | (5.84,6.64) | 0.20 |  | 6.22 | (5.86,6.58) | 0.18 |  |
|  | Unemployed and looking for a job | 5.65 | (5.15,6.16) | 0.26 |  | 5.29 | (4.70,5.89) | 0.30 |  | 5.71 | (5.16,6.26) | 0.28 |  |
| Religious service attendance | A few times a year | 6.83 | (6.67,6.99) | 0.08 | < .001 | 6.87 | (6.68,7.05) | 0.09 | < .001 | 7.08 | (6.92,7.23) | 0.08 | < .001 |
|  | More than once a week | 7.72 | (7.40,8.03) | 0.16 |  | 7.77 | (7.39,8.15) | 0.19 |  | 7.77 | (7.44,8.11) | 0.17 |  |
|  | Never | 6.70 | (6.61,6.78) | 0.05 |  | 6.69 | (6.59,6.79) | 0.05 |  | 6.78 | (6.69,6.87) | 0.05 |  |
|  | Once a week | 7.20 | (6.97,7.43) | 0.12 |  | 7.34 | (7.08,7.60) | 0.13 |  | 7.31 | (7.09,7.53) | 0.11 |  |
|  | One to three times a month | 7.00 | (6.70,7.30) | 0.15 |  | 6.81 | (6.40,7.22) | 0.21 |  | 6.92 | (6.59,7.26) | 0.17 |  |
| Education | Up to 8 years | 7.40 | (6.50,8.30) | 0.45 | < .001 | 7.47 | (6.64,8.30) | 0.42 | 0.002 | 7.98 | (7.31,8.65) | 0.33 | < .001 |
|  | 16+ years | 7.01 | (6.93,7.10) | 0.04 |  | 6.97 | (6.87,7.07) | 0.05 |  | 7.00 | (6.91,7.09) | 0.05 |  |
|  | 9 to 15 years | 6.68 | (6.58,6.78) | 0.05 |  | 6.72 | (6.60,6.83) | 0.06 |  | 6.84 | (6.74,6.95) | 0.05 |  |
| Immigration status | Born in another country | 6.96 | (6.82,7.10) | 0.07 | 0.017 | 7.05 | (6.91,7.19) | 0.07 | < .001 | 7.08 | (6.94,7.22) | 0.07 | 0.010 |
|  | Born in this country | 6.77 | (6.68,6.85) | 0.04 |  | 6.75 | (6.65,6.85) | 0.05 |  | 6.87 | (6.78,6.95) | 0.04 |  |
| Religious affiliation | Buddhism | 6.80 | (6.25,7.35) | 0.26 | < .001 | 7.18 | (6.50,7.85) | 0.33 | < .001 | 7.21 | (6.65,7.77) | 0.27 | < .001 |
|  | Christianity | 7.06 | (6.96,7.16) | 0.05 |  | 7.10 | (6.98,7.22) | 0.06 |  | 7.20 | (7.10,7.31) | 0.05 |  |
|  | Hinduism | 6.27 | (5.23,7.31) | 0.50 |  | 6.51 | (5.51,7.50) | 0.48 |  | 6.93 | (6.21,7.65) | 0.35 |  |
|  | Islam | 6.71 | (5.96,7.45) | 0.36 |  | 6.76 | (5.65,7.87) | 0.54 |  | 6.74 | (5.99,7.49) | 0.37 |  |
|  | Judaism | 6.79 | (6.24,7.34) | 0.25 |  | 7.07 | (6.49,7.64) | 0.26 |  | 6.81 | (6.25,7.37) | 0.26 |  |
|  | No religion/Atheist/Agnostic | 6.63 | (6.53,6.73) | 0.05 |  | 6.59 | (6.48,6.71) | 0.06 |  | 6.70 | (6.60,6.80) | 0.05 |  |
|  | Primal, Animist, or Folk religion | 6.20 | (5.34,7.06) | 0.38 |  | 6.34 | (5.35,7.34) | 0.44 |  | 5.94 | (4.64,7.25) | 0.58 |  |
|  | Sikhism | 5.76 | * | * |  | 6.09 | * | * |  | 5.80 | * | * |  |
|  | Some other religion | 6.91 | (5.81,8.02) | 0.54 |  | 7.01 | (5.89,8.13) | 0.54 |  | 6.96 | (5.95,7.97) | 0.49 |  |
|  | Taoism | 7.02 | * | * |  | 6.97 | * | * |  | 7.20 | * | * |  |
|  | Baha’i | 8.53 | * | * |  | 8.56 | * | * |  | 8.77 | * | * |  |

Table S3f. Complete-case supplemental analysis of childhood predictors regression analysis results for Australia

|  | | Life Evaluation | | | | Life Satisfaction | | | | Happiness | | | |
| --- | --- | --- | --- | --- | --- | --- | --- | --- | --- | --- | --- | --- | --- |
| Variable | Category | Est | 95% CI | SE | Global p-value | Est | 95% CI | SE | Global p-value | Est | 95% CI | SE | Global p-value |
| Relationship with mother | (Ref: Very bad/somewhat bad) |  |  |  | 0.348 |  |  |  | 0.464 |  |  |  | 0.782 |
|  | Very good/somewhat good | 0.14 | (-0.15,0.43) | 0.15 |  | -0.12 | (-0.46,0.21) | 0.17 |  | 0.04 | (-0.26,0.35) | 0.16 |  |
| Relationship with father | (Ref: Very bad/somewhat bad) |  |  |  | 0.893 |  |  |  | 0.671 |  |  |  | 0.529 |
|  | Very good/somewhat good | 0.02 | (-0.23,0.27) | 0.13 |  | 0.06 | (-0.22,0.34) | 0.14 |  | 0.08 | (-0.17,0.32) | 0.12 |  |
| Parent marital status | (Ref: Parents married) |  |  |  | 0.469 |  |  |  | 0.213 |  |  |  | 0.635 |
|  | No, one or both of them had died | 0.14 | (-0.30,0.58) | 0.22 |  | 0.15 | (-0.39,0.69) | 0.27 |  | 0.16 | (-0.27,0.60) | 0.22 |  |
|  | No, they were never married | 0.20 | (-0.23,0.63) | 0.22 |  | 0.50 | (0.04,0.96) | 0.24 |  | 0.13 | (-0.29,0.56) | 0.22 |  |
|  | Yes, married | -0.07 | (-0.31,0.17) | 0.12 |  | 0.14 | (-0.13,0.42) | 0.14 |  | -0.04 | (-0.29,0.21) | 0.13 |  |
| Subjective financial status of family growing up | (Ref: Got by) |  |  |  | 0.003 |  |  |  | 0.070 |  |  |  | 0.132 |
|  | Found it difficult | 0.08 | (-0.15,0.32) | 0.12 |  | 0.14 | (-0.10,0.39) | 0.13 |  | 0.00 | (-0.24,0.24) | 0.12 |  |
|  | Found it very difficult | -0.55 | (-0.95,-0.16) | 0.20 |  | -0.48 | (-0.97,0.00) | 0.25 |  | -0.34 | (-0.75,0.07) | 0.21 |  |
|  | Lived comfortably | 0.15 | (0.01,0.29) | 0.07 |  | 0.09 | (-0.07,0.25) | 0.08 |  | 0.11 | (-0.04,0.25) | 0.07 |  |
| Abuse | (Ref: No) |  |  |  | <.001 |  |  |  | <.001 |  |  |  | <.001 |
|  | Yes | -0.36 | (-0.54,-0.18) | 0.09 |  | -0.43 | (-0.64,-0.23) | 0.10 |  | -0.39 | (-0.57,-0.21) | 0.09 |  |
| Outsider growing up | (Ref: No) |  |  |  | <.001 |  |  |  | <.001 |  |  |  | <.001 |
|  | Yes | -0.62 | (-0.83,-0.42) | 0.10 |  | -0.70 | (-0.93,-0.46) | 0.12 |  | -0.51 | (-0.72,-0.29) | 0.11 |  |
| Self-rated health growing up | (Ref: Good) |  |  |  | <.001 |  |  |  | <.001 |  |  |  | <.001 |
|  | Excellent | 0.47 | (0.27,0.67) | 0.10 |  | 0.60 | (0.38,0.82) | 0.11 |  | 0.55 | (0.35,0.75) | 0.10 |  |
|  | Fair | -0.27 | (-0.60,0.05) | 0.17 |  | -0.31 | (-0.69,0.07) | 0.19 |  | -0.19 | (-0.53,0.15) | 0.17 |  |
|  | Poor | -0.39 | (-1.05,0.28) | 0.34 |  | -0.41 | (-1.08,0.26) | 0.34 |  | -0.42 | (-0.93,0.10) | 0.26 |  |
|  | Very good | 0.12 | (-0.09,0.33) | 0.11 |  | 0.15 | (-0.08,0.38) | 0.12 |  | 0.16 | (-0.05,0.36) | 0.11 |  |
| Immigration status | (Ref: Born in this country) |  |  |  | 0.272 |  |  |  | 0.198 |  |  |  | 0.501 |
|  | Born in another country | 0.11 | (-0.08,0.30) | 0.10 |  | 0.13 | (-0.07,0.33) | 0.10 |  | 0.07 | (-0.13,0.26) | 0.10 |  |
| Age 12 religious service attendance | (Ref: Never) |  |  |  | 0.212 |  |  |  | 0.162 |  |  |  | 0.490 |
|  | At least once a week | 0.20 | (0.01,0.39) | 0.10 |  | 0.17 | (-0.04,0.37) | 0.10 |  | 0.12 | (-0.06,0.31) | 0.10 |  |
|  | Less than once a month | 0.15 | (-0.07,0.36) | 0.11 |  | 0.07 | (-0.17,0.31) | 0.12 |  | -0.01 | (-0.22,0.21) | 0.11 |  |
|  | One to three times a month | 0.14 | (-0.08,0.35) | 0.11 |  | -0.08 | (-0.34,0.18) | 0.13 |  | 0.05 | (-0.18,0.28) | 0.12 |  |
| Year of birth | (Ref: 1998-2005; current age: 18-24) |  |  |  | <.001 |  |  |  | <.001 |  |  |  | <.001 |
|  | 1993-1998; age 25-29 | 0.26 | (-0.11,0.63) | 0.19 |  | 0.30 | (-0.13,0.73) | 0.22 |  | 0.20 | (-0.19,0.59) | 0.20 |  |
|  | 1983-1993; age 30-39 | 0.56 | (0.26,0.86) | 0.15 |  | 0.55 | (0.17,0.93) | 0.19 |  | 0.40 | (0.08,0.73) | 0.16 |  |
|  | 1973-1983; age 40-49 | 0.55 | (0.25,0.85) | 0.15 |  | 0.73 | (0.36,1.11) | 0.19 |  | 0.58 | (0.26,0.89) | 0.16 |  |
|  | 1963-1973; age 50-59 | 0.41 | (0.11,0.71) | 0.15 |  | 0.61 | (0.25,0.98) | 0.19 |  | 0.43 | (0.11,0.75) | 0.16 |  |
|  | 1953-1963; age 60-69 | 0.82 | (0.52,1.11) | 0.15 |  | 1.05 | (0.68,1.43) | 0.19 |  | 0.95 | (0.63,1.26) | 0.16 |  |
|  | 1943-1953; age 70-79 | 1.22 | (0.91,1.53) | 0.16 |  | 1.47 | (1.08,1.87) | 0.20 |  | 1.36 | (1.03,1.69) | 0.17 |  |
|  | 1943 or earlier; age 80+ | 1.29 | (0.91,1.67) | 0.19 |  | 1.71 | (1.31,2.10) | 0.20 |  | 1.65 | (1.31,1.98) | 0.17 |  |
| Gender | (Ref: Male) |  |  |  | 0.505 |  |  |  | 0.080 |  |  |  | 0.091 |
|  | Male | -0.04 | (-0.17,0.09) | 0.07 |  | -0.16 | (-0.31,-0.00) | 0.08 |  | -0.14 | (-0.28,-0.01) | 0.07 |  |
|  | Other | 0.28 | (-0.29,0.84) | 0.29 |  | -0.55 | (-1.52,0.42) | 0.49 |  | -0.32 | (-1.01,0.37) | 0.35 |  |
| Religious affiliation | (Ref: No religion/Atheist/Agnostic) |  |  |  | 0.282 |  |  |  | 0.608 |  |  |  | 0.423 |
|  | Christianity | 0.12 | (-0.07,0.30) | 0.10 |  | 0.07 | (-0.13,0.28) | 0.11 |  | 0.09 | (-0.10,0.28) | 0.10 |  |
|  | Christianity | 0.12 | (-0.07,0.30) | 0.10 |  | 0.07 | (-0.13,0.28) | 0.11 |  | 0.09 | (-0.10,0.28) | 0.10 |  |
|  | Collapsed affiliations with prevalence<3% | -0.11 | (-0.50,0.29) | 0.20 |  | -0.10 | (-0.56,0.36) | 0.24 |  | -0.11 | (-0.50,0.29) | 0.20 |  |
| Race/ethnicity | (Ref: Plurality group) |  |  |  | 0.952 |  |  |  | 0.332 |  |  |  | 0.284 |
|  | Non-plurality groups | -0.01 | (-0.21,0.20) | 0.11 |  | 0.11 | (-0.11,0.33) | 0.11 |  | 0.11 | (-0.09,0.31) | 0.10 |  |

Table S3g. Complete-case supplemental analysis of sensitivity to unmeasured confounding of childhood predictors in Australia

|  | | Life Evaluation | | Life Satisfaction | | Happiness | |
| --- | --- | --- | --- | --- | --- | --- | --- |
| Variable | Category | E-value for Estimate | E-value for 95% CI | E-value for Estimate | E-value for 95% CI | E-value for Estimate | E-value for 95% CI |
| Relationship with mother | (Ref: Very bad/somewhat bad) |  |  |  |  |  |  |
|  | Very good/somewhat good | 1.36 | 1.00 | 1.31 | 1.00 | 1.18 | 1.00 |
| Relationship with father | (Ref: Very bad/somewhat bad) |  |  |  |  |  |  |
|  | Very good/somewhat good | 1.10 | 1.00 | 1.20 | 1.00 | 1.25 | 1.00 |
| Parent marital status | (Ref: Parents married) |  |  |  |  |  |  |
|  | No, one or both of them had died | 1.36 | 1.00 | 1.35 | 1.00 | 1.40 | 1.00 |
|  | No, they were never married | 1.47 | 1.00 | 1.84 | 1.15 | 1.35 | 1.00 |
|  | Yes, married | 1.23 | 1.00 | 1.34 | 1.00 | 1.17 | 1.00 |
| Subjective financial status of family growing up | (Ref: Got by) |  |  |  |  |  |  |
|  | Found it difficult | 1.26 | 1.00 | 1.34 | 1.00 | 1.05 | 1.00 |
|  | Found it very difficult | 2.01 | 1.39 | 1.82 | 1.00 | 1.67 | 1.00 |
|  | Lived comfortably | 1.38 | 1.08 | 1.26 | 1.00 | 1.30 | 1.00 |
| Abuse | (Ref: No) |  |  |  |  |  |  |
|  | Yes | 1.71 | 1.44 | 1.75 | 1.47 | 1.75 | 1.47 |
| Outsider growing up | (Ref: No) |  |  |  |  |  |  |
|  | Yes | 2.12 | 1.80 | 2.12 | 1.79 | 1.93 | 1.60 |
| Self-rated health growing up | (Ref: Good) |  |  |  |  |  |  |
|  | Excellent | 1.89 | 1.58 | 1.97 | 1.68 | 2.00 | 1.69 |
|  | Fair | 1.58 | 1.00 | 1.58 | 1.00 | 1.44 | 1.00 |
|  | Poor | 1.75 | 1.00 | 1.72 | 1.00 | 1.79 | 1.00 |
|  | Very good | 1.33 | 1.00 | 1.35 | 1.00 | 1.39 | 1.00 |
| Immigration status | (Ref: Born in this country) |  |  |  |  |  |  |
|  | Born in another country | 1.31 | 1.00 | 1.32 | 1.00 | 1.22 | 1.00 |
| Age 12 religious service attendance | (Ref: Never) |  |  |  |  |  |  |
|  | At least once a week | 1.47 | 1.09 | 1.38 | 1.00 | 1.33 | 1.00 |
|  | Less than once a month | 1.38 | 1.00 | 1.22 | 1.00 | 1.06 | 1.00 |
|  | One to three times a month | 1.36 | 1.00 | 1.23 | 1.00 | 1.18 | 1.00 |
| Year of birth | (Ref: 1998-2005; current age: 18-24) |  |  |  |  |  |  |
|  | 1993-1998; age 25-29 | 1.56 | 1.00 | 1.57 | 1.00 | 1.45 | 1.00 |
|  | 1983-1993; age 30-39 | 2.03 | 1.56 | 1.90 | 1.38 | 1.77 | 1.26 |
|  | 1973-1983; age 40-49 | 2.00 | 1.54 | 2.17 | 1.65 | 2.04 | 1.56 |
|  | 1963-1973; age 50-59 | 1.79 | 1.31 | 1.99 | 1.49 | 1.81 | 1.30 |
|  | 1953-1963; age 60-69 | 2.45 | 1.96 | 2.65 | 2.09 | 2.65 | 2.13 |
|  | 1943-1953; age 70-79 | 3.21 | 2.61 | 3.39 | 2.69 | 3.46 | 2.80 |
|  | 1943 or earlier; age 80+ | 3.35 | 2.61 | 3.86 | 3.09 | 4.13 | 3.37 |
| Gender | (Ref: Male) |  |  |  |  |  |  |
|  | Male | 1.17 | 1.00 | 1.36 | 1.05 | 1.36 | 1.06 |
|  | Other | 1.58 | 1.00 | 1.91 | 1.00 | 1.64 | 1.00 |
| Religious affiliation | (Ref: No religion/Atheist/Agnostic) |  |  |  |  |  |  |
|  | Christianity | 1.32 | 1.00 | 1.23 | 1.00 | 1.27 | 1.00 |
|  | Christianity | 1.32 | 1.00 | 1.23 | 1.00 | 1.27 | 1.00 |
|  | Collapsed affiliations with prevalence<3% | 1.30 | 1.00 | 1.27 | 1.00 | 1.30 | 1.00 |
| Race/ethnicity | (Ref: Plurality group) |  |  |  |  |  |  |
|  | Non-plurality groups | 1.06 | 1.00 | 1.29 | 1.00 | 1.31 | 1.00 |

# Tables S4a-g: Brazil

Table S4a. Nationally representative descriptive statistics for Brazil

| **Characteristic** | **N = 13,204**1 |
| --- | --- |
| **Age group** |  |
| 1998-2005; age 18-24 | 1,986 (15%) |
| 1993-1998; age 25-29 | 1,468 (11%) |
| 1983-1993; age 30-39 | 2,908 (22%) |
| 1973-1983; age 40-49 | 2,638 (20%) |
| 1963-1973; age 50-59 | 2,131 (16%) |
| 1953-1963; age 60-69 | 1,435 (11%) |
| 1943-1953; age 70-79 | 510 (3.9%) |
| 1943 or earlier; age 80+ | 126 (1.0%) |
| (Missing) | 0 (0%) |
| **Gender** |  |
| Male | 6,320 (48%) |
| Female | 6,820 (52%) |
| Other | 35 (0.3%) |
| (Missing) | 30 (0.2%) |
| **Race/Ethnicity** |  |
| Amarela | 238 (1.8%) |
| Branca | 5,169 (39%) |
| Indígena | 131 (1.0%) |
| Other | 61 (0.5%) |
| Parda | 5,125 (39%) |
| Preta | 1,615 (12%) |
| (Missing) | 865 (6.6%) |
| **Respondent Marital status** |  |
| Married | 4,646 (35%) |
| Separated | 594 (4.5%) |
| Divorced | 865 (6.5%) |
| Widowed | 408 (3.1%) |
| Single, never married | 4,347 (33%) |
| Domestic Partner | 2,081 (16%) |
| (Missing) | 263 (2.0%) |
| **Employment** |  |
| Employed for an employer | 3,756 (28%) |
| Self-employed | 2,918 (22%) |
| Retired | 1,536 (12%) |
| Student | 624 (4.7%) |
| Homemaker | 1,305 (9.9%) |
| Unemployed and looking for a job | 2,419 (18%) |
| None of these/Other | 448 (3.4%) |
| (Missing) | 199 (1.5%) |
| **Religious service attendance as an adult (now)** |  |
| More than 1/week | 2,386 (18%) |
| 1/week | 2,272 (17%) |
| 1-3/month | 1,398 (11%) |
| A few times a year | 3,978 (30%) |
| Never | 3,110 (24%) |
| (Missing) | 61 (0.5%) |
| **Education (years)** |  |
| Up to 8 years | 3,139 (24%) |
| 9-15 years | 7,665 (58%) |
| 16+ years | 2,390 (18%) |
| (Missing) | 10 (<0.1%) |
| **Immigration status** |  |
| Born in this country | 12,688 (96%) |
| Born in another country | 153 (1.2%) |
| (Missing) | 363 (2.7%) |
| **Religious affiliation as an adult (now)** |  |
| Christianity | 9,911 (75%) |
| Islam | 6 (<0.1%) |
| Hinduism | 1 (<0.1%) |
| Buddhism | 37 (0.3%) |
| Judaism | 31 (0.2%) |
| Sikhism | 0 (0%) |
| Baha'i | 2 (<0.1%) |
| Jainism | 2 (<0.1%) |
| Shinto | 1 (<0.1%) |
| Taoism | 1 (<0.1%) |
| Confucianism | 6 (<0.1%) |
| Primal, Animist, or Folk religion | 15 (0.1%) |
| Spiritism | 696 (5.3%) |
| Umbanda, Candomble, and other African-derived religions | 525 (4.0%) |
| Chinese folk/traditional religion | 0 (0%) |
| Some other religion | 144 (1.1%) |
| No religion/Atheist/Agnostic | 1,712 (13%) |
| (Missing) | 113 (0.9%) |
| **Relationship with mother growing up** |  |
| Very good | 8,369 (63%) |
| Somewhat good | 3,559 (27%) |
| Somewhat bad | 483 (3.7%) |
| Very bad | 214 (1.6%) |
| Does not apply | 507 (3.8%) |
| (Missing) | 73 (0.6%) |
| **Relationship with father growing up** |  |
| Very good | 6,364 (48%) |
| Somewhat good | 3,654 (28%) |
| Somewhat bad | 1,035 (7.8%) |
| Very bad | 756 (5.7%) |
| Does not apply | 1,303 (9.9%) |
| (Missing) | 93 (0.7%) |
| **Parent marital status at age 12** |  |
| Parents married | 8,546 (65%) |
| Divorced | 1,384 (10%) |
| Parents were never married | 1,985 (15%) |
| One or both parents had died | 508 (3.8%) |
| (Missing) | 781 (5.9%) |
| **Subjective financial status of family growing up** |  |
| Lived comfortably | 4,998 (38%) |
| Got by | 4,616 (35%) |
| Found it difficult | 2,484 (19%) |
| Found it very difficult | 1,027 (7.8%) |
| (Missing) | 79 (0.6%) |
| **Abuse** |  |
| Yes | 2,606 (20%) |
| No | 10,147 (77%) |
| (Missing) | 451 (3.4%) |
| **Outsider growing up** |  |
| Yes | 1,659 (13%) |
| No | 11,234 (85%) |
| (Missing) | 311 (2.4%) |
| **Self-rated health growing up** |  |
| Excellent | 5,312 (40%) |
| Very good | 3,392 (26%) |
| Good | 2,873 (22%) |
| Fair | 1,368 (10%) |
| Poor | 228 (1.7%) |
| (Missing) | 30 (0.2%) |
| **Age 12 religious service attendance** |  |
| At least 1/week | 6,306 (48%) |
| 1-3/month | 2,491 (19%) |
| <1/month | 2,629 (20%) |
| Never | 1,707 (13%) |
| (Missing) | 71 (0.5%) |
| **Religious affiliation at age 12** |  |
| Christianity | 11,403 (86%) |
| Islam | 15 (0.1%) |
| Hinduism | 1 (<0.1%) |
| Buddhism | 27 (0.2%) |
| Judaism | 40 (0.3%) |
| Sikhism | 0 (0%) |
| Baha'i | 1 (<0.1%) |
| Jainism | 4 (<0.1%) |
| Shinto | 4 (<0.1%) |
| Taoism | 1 (<0.1%) |
| Confucianism | 7 (<0.1%) |
| Primal, Animist, or Folk religion | 17 (0.1%) |
| Spiritism | 336 (2.5%) |
| Umbanda, Candomble, and other African-derived religions | 262 (2.0%) |
| Chinese folk/traditional religion | 0 (0%) |
| Some other religion | 87 (0.7%) |
| No religion/Atheist/Agnostic | 908 (6.9%) |
| (Missing) | 94 (0.7%) |
| 1n (%) | |

Table S4b. Means by demographic category for Brazil

|  | | Life Evaluation | | | | Life Satisfaction | | | | Happiness | | | |
| --- | --- | --- | --- | --- | --- | --- | --- | --- | --- | --- | --- | --- | --- |
| Variable | Category | Mean | 95% CI | SE | Global p-value | Mean | 95% CI | SE | Global p-value | Mean | 95% CI | SE | Global p-value |
| Age group | 18-24 | 6.28 | (6.17,6.40) | 0.06 | < .001 | 6.64 | (6.50,6.77) | 0.07 | < .001 | 7.03 | (6.91,7.15) | 0.06 | < .001 |
|  | 25-29 | 6.31 | (6.16,6.47) | 0.08 |  | 6.87 | (6.70,7.03) | 0.08 |  | 7.11 | (6.95,7.27) | 0.08 |  |
|  | 30-39 | 6.56 | (6.47,6.66) | 0.05 |  | 7.14 | (7.04,7.25) | 0.05 |  | 7.33 | (7.23,7.43) | 0.05 |  |
|  | 40-49 | 6.64 | (6.53,6.75) | 0.06 |  | 7.20 | (7.07,7.32) | 0.06 |  | 7.32 | (7.21,7.44) | 0.06 |  |
|  | 50-59 | 6.56 | (6.42,6.71) | 0.07 |  | 7.28 | (7.13,7.42) | 0.08 |  | 7.37 | (7.23,7.52) | 0.08 |  |
|  | 60-69 | 7.05 | (6.87,7.24) | 0.09 |  | 7.47 | (7.26,7.68) | 0.11 |  | 7.68 | (7.51,7.85) | 0.09 |  |
|  | 70-79 | 7.17 | (6.80,7.54) | 0.19 |  | 8.22 | (7.90,8.53) | 0.16 |  | 7.99 | (7.69,8.28) | 0.15 |  |
|  | 80 or older | 7.12 | (6.30,7.93) | 0.41 |  | 7.94 | (7.23,8.65) | 0.36 |  | 7.87 | (7.17,8.57) | 0.35 |  |
| Gender | Male | 6.62 | (6.54,6.70) | 0.04 | 0.261 | 7.27 | (7.19,7.36) | 0.04 | < .001 | 7.42 | (7.34,7.49) | 0.04 | 0.011 |
|  | Female | 6.57 | (6.49,6.64) | 0.04 |  | 7.04 | (6.96,7.12) | 0.04 |  | 7.26 | (7.19,7.33) | 0.04 |  |
|  | Other | 6.01 | (5.07,6.95) | 0.46 |  | 6.70 | (5.51,7.89) | 0.58 |  | 6.94 | (5.85,8.02) | 0.53 |  |
| Marital status | Married | 7.06 | (6.97,7.15) | 0.04 | < .001 | 7.71 | (7.63,7.80) | 0.04 | < .001 | 7.83 | (7.75,7.91) | 0.04 | < .001 |
|  | Separated | 5.80 | (5.51,6.09) | 0.15 |  | 6.47 | (6.18,6.77) | 0.15 |  | 6.74 | (6.45,7.03) | 0.15 |  |
|  | Divorced | 6.50 | (6.29,6.71) | 0.11 |  | 6.93 | (6.69,7.17) | 0.12 |  | 7.26 | (7.06,7.46) | 0.10 |  |
|  | Widowed | 7.06 | (6.67,7.45) | 0.20 |  | 7.51 | (7.09,7.93) | 0.21 |  | 7.66 | (7.31,8.01) | 0.18 |  |
|  | Never | 6.24 | (6.15,6.33) | 0.05 |  | 6.71 | (6.61,6.81) | 0.05 |  | 6.92 | (6.82,7.02) | 0.05 |  |
|  | Domestic Partner | 6.44 | (6.33,6.56) | 0.06 |  | 7.06 | (6.92,7.19) | 0.07 |  | 7.24 | (7.12,7.36) | 0.06 |  |
| Employment | Employed for an employer | 6.83 | (6.76,6.91) | 0.04 | < .001 | 7.38 | (7.29,7.47) | 0.04 | < .001 | 7.51 | (7.43,7.59) | 0.04 | < .001 |
|  | Self-employed | 6.66 | (6.56,6.76) | 0.05 |  | 7.25 | (7.14,7.36) | 0.05 |  | 7.44 | (7.33,7.54) | 0.05 |  |
|  | Retired | 7.18 | (6.99,7.37) | 0.10 |  | 7.79 | (7.60,7.98) | 0.10 |  | 7.82 | (7.66,7.99) | 0.09 |  |
|  | Student | 6.59 | (6.41,6.78) | 0.09 |  | 6.98 | (6.75,7.20) | 0.11 |  | 7.23 | (7.03,7.44) | 0.10 |  |
|  | Homemaker | 6.60 | (6.41,6.78) | 0.10 |  | 7.18 | (6.97,7.38) | 0.10 |  | 7.40 | (7.22,7.58) | 0.09 |  |
|  | Unemployed and looking for a job | 5.78 | (5.64,5.92) | 0.07 |  | 6.34 | (6.19,6.49) | 0.08 |  | 6.65 | (6.51,6.79) | 0.07 |  |
|  | None of these/Other | 6.44 | (6.12,6.77) | 0.17 |  | 7.01 | (6.68,7.35) | 0.17 |  | 7.19 | (6.87,7.51) | 0.16 |  |
| Religious service attendance | More than 1/week | 7.12 | (6.99,7.26) | 0.07 | < .001 | 7.79 | (7.65,7.92) | 0.07 | < .001 | 7.96 | (7.84,8.09) | 0.06 | < .001 |
|  | 1/week | 6.77 | (6.64,6.90) | 0.07 |  | 7.38 | (7.25,7.52) | 0.07 |  | 7.56 | (7.44,7.68) | 0.06 |  |
|  | 1-3/month | 6.51 | (6.35,6.67) | 0.08 |  | 7.17 | (7.00,7.34) | 0.09 |  | 7.34 | (7.18,7.49) | 0.08 |  |
|  | A few times a year | 6.50 | (6.42,6.58) | 0.04 |  | 7.10 | (7.01,7.19) | 0.05 |  | 7.25 | (7.17,7.34) | 0.04 |  |
|  | Never | 6.21 | (6.10,6.32) | 0.06 |  | 6.56 | (6.43,6.68) | 0.06 |  | 6.79 | (6.67,6.91) | 0.06 |  |
| Education | Up to 8 years | 6.53 | (6.40,6.67) | 0.07 | < .001 | 7.34 | (7.20,7.48) | 0.07 | < .001 | 7.48 | (7.35,7.61) | 0.07 | < .001 |
|  | 9-15 years | 6.48 | (6.42,6.55) | 0.03 |  | 7.02 | (6.95,7.09) | 0.04 |  | 7.24 | (7.17,7.31) | 0.03 |  |
|  | 16+ years | 7.02 | (6.93,7.11) | 0.05 |  | 7.33 | (7.23,7.43) | 0.05 |  | 7.44 | (7.34,7.54) | 0.05 |  |
| Immigration status | Born in this country | 6.58 | (6.53,6.64) | 0.03 | 0.018 | 7.15 | (7.09,7.21) | 0.03 | 0.508 | 7.33 | (7.28,7.38) | 0.03 | 0.466 |
|  | Born in another country | 7.09 | (6.66,7.51) | 0.22 |  | 7.29 | (6.74,7.83) | 0.27 |  | 7.50 | (7.04,7.97) | 0.24 |  |
| Religious affiliation | Christianity | 6.68 | (6.62,6.74) | 0.03 | < .001 | 7.31 | (7.25,7.38) | 0.03 | < .001 | 7.48 | (7.42,7.54) | 0.03 | < .001 |
|  | Islam | 7.80 | * | * |  | 6.77 | * | * |  | 7.19 | * | * |  |
|  | Hinduism | 6.23 | * | * |  | 4.24 | * | * |  | 4.93 | * | * |  |
|  | Buddhism | 6.92 | (6.13,7.71) | 0.38 |  | 6.79 | (5.90,7.68) | 0.43 |  | 7.24 | (6.42,8.06) | 0.39 |  |
|  | Judaism | 6.42 | (5.56,7.28) | 0.40 |  | 5.28 | (3.26,7.31) | 0.94 |  | 6.01 | (3.93,8.09) | 0.96 |  |
|  | Baha'i | 10.00 | * | * |  | 10.00 | * | * |  | 9.65 | * | * |  |
|  | Jainism | 5.89 | * | * |  | 3.83 | * | * |  | 6.89 | * | * |  |
|  | Shinto | 7.33 | * | * |  | 6.34 | * | * |  | 6.33 | * | * |  |
|  | Taoism | 7.08 | * | * |  | 7.50 | * | * |  | 7.55 | * | * |  |
|  | Confucianism | 7.83 | * | * |  | 7.31 | * | * |  | 7.48 | * | * |  |
|  | Primal, Animist, or Folk religion | 7.58 | * | * |  | 7.14 | * | * |  | 8.01 | * | * |  |
|  | Spiritism | 6.56 | (6.33,6.79) | 0.12 |  | 7.01 | (6.76,7.26) | 0.13 |  | 7.14 | (6.90,7.37) | 0.12 |  |
|  | Umbanda, Candomble, and other African-derived religions | 6.31 | (6.07,6.54) | 0.12 |  | 6.70 | (6.43,6.98) | 0.14 |  | 6.95 | (6.67,7.23) | 0.14 |  |
|  | Some other religion | 6.56 | (6.08,7.04) | 0.24 |  | 7.10 | (6.51,7.68) | 0.30 |  | 6.90 | (6.37,7.42) | 0.27 |  |
|  | No religion/Atheist/Agnostic | 6.14 | (6.00,6.28) | 0.07 |  | 6.46 | (6.30,6.62) | 0.08 |  | 6.76 | (6.62,6.90) | 0.07 |  |
| Race/Ethnicity | Branca | 6.70 | (6.62,6.78) | 0.04 | 0.003 | 7.17 | (7.08,7.26) | 0.05 | 0.070 | 7.33 | (7.25,7.42) | 0.04 | 0.049 |
|  | Preta | 6.50 | (6.36,6.65) | 0.07 |  | 7.05 | (6.90,7.21) | 0.08 |  | 7.41 | (7.26,7.56) | 0.07 |  |
|  | Parda | 6.54 | (6.46,6.62) | 0.04 |  | 7.20 | (7.11,7.29) | 0.04 |  | 7.35 | (7.27,7.43) | 0.04 |  |
|  | Amarela | 6.11 | (5.68,6.53) | 0.21 |  | 6.69 | (6.24,7.15) | 0.23 |  | 6.73 | (6.26,7.20) | 0.24 |  |
|  | Indígena | 6.26 | (5.66,6.87) | 0.30 |  | 6.70 | (6.07,7.32) | 0.31 |  | 6.97 | (6.30,7.64) | 0.33 |  |
|  | Other | 6.84 | (5.97,7.72) | 0.44 |  | 7.35 | (6.60,8.09) | 0.37 |  | 6.96 | (5.81,8.12) | 0.58 |  |

Table S4c. Childhood predictors regression analysis results for Brazil

|  | | Life Evaluation | | | | Life Satisfaction | | | | Happiness | | | |
| --- | --- | --- | --- | --- | --- | --- | --- | --- | --- | --- | --- | --- | --- |
| Variable | Category | Est | 95% CI | SE | Global p-value | Est | 95% CI | SE | Global p-value | Est | 95% CI | SE | Global p-value |
| Relationship with mother | (Ref: Very bad/somewhat bad) |  |  |  | 0.058 |  |  |  | 0.088 |  |  |  | 0.019 |
|  | Very good/somewhat good | 0.22 | (-0.01, 0.45) | 0.12 |  | 0.21 | (-0.05, 0.48) | 0.14 |  | 0.28 | (0.04, 0.52) | 0.12 |  |
| Relationship with father | (Ref: Very bad/somewhat bad) |  |  |  | <.001 |  |  |  | <.001 |  |  |  | <.001 |
|  | Very good/somewhat good | 0.37 | (0.22, 0.51) | 0.07 |  | 0.57 | (0.40, 0.73) | 0.08 |  | 0.46 | (0.31, 0.62) | 0.08 |  |
| Parent marital status | (Ref: Parents married) |  |  |  | 0.025 |  |  |  | 0.478 |  |  |  | 0.269 |
|  | Divorced | -0.14 | (-0.30, 0.02) | 0.08 |  | -0.04 | (-0.20, 0.12) | 0.08 |  | -0.11 | (-0.27, 0.06) | 0.08 |  |
|  | Parents were never married | -0.23 | (-0.39, -0.06) | 0.08 |  | -0.10 | (-0.27, 0.08) | 0.09 |  | 0.03 | (-0.14, 0.20) | 0.09 |  |
|  | One or both parents had died | -0.14 | (-0.46, 0.18) | 0.16 |  | -0.21 | (-0.56, 0.13) | 0.18 |  | -0.18 | (-0.49, 0.13) | 0.16 |  |
| Subjective financial status of family growing up | (Ref: Got by) |  |  |  | <.001 |  |  |  | <.001 |  |  |  | <.001 |
|  | Lived comfortably | 0.44 | (0.32, 0.55) | 0.06 |  | 0.30 | (0.18, 0.43) | 0.06 |  | 0.28 | (0.17, 0.40) | 0.06 |  |
|  | Found it difficult | -0.19 | (-0.35, -0.04) | 0.08 |  | -0.06 | (-0.23, 0.11) | 0.09 |  | -0.09 | (-0.24, 0.06) | 0.08 |  |
|  | Found it very difficult | -0.31 | (-0.57, -0.06) | 0.13 |  | -0.02 | (-0.29, 0.25) | 0.14 |  | -0.24 | (-0.50, 0.02) | 0.13 |  |
| Abuse | (Ref: No) |  |  |  | <.001 |  |  |  | <.001 |  |  |  | <.001 |
|  | Yes | -0.23 | (-0.36, -0.09) | 0.07 |  | -0.48 | (-0.63, -0.33) | 0.08 |  | -0.38 | (-0.52, -0.24) | 0.07 |  |
| Outsider growing up | (Ref: No) |  |  |  | 0.064 |  |  |  | <.001 |  |  |  | <.001 |
|  | Yes | -0.15 | (-0.30, 0.01) | 0.08 |  | -0.57 | (-0.76, -0.39) | 0.09 |  | -0.55 | (-0.71, -0.39) | 0.08 |  |
| Self-rated health growing up | (Ref: Good) |  |  |  | <.001 |  |  |  | <.001 |  |  |  | <.001 |
|  | Excellent | 0.26 | (0.12, 0.40) | 0.07 |  | 0.31 | (0.17, 0.45) | 0.07 |  | 0.41 | (0.27, 0.54) | 0.07 |  |
|  | Very good | 0.07 | (-0.07, 0.21) | 0.07 |  | 0.00 | (-0.15, 0.15) | 0.08 |  | 0.07 | (-0.07, 0.22) | 0.07 |  |
|  | Fair | -0.42 | (-0.63, -0.20) | 0.11 |  | -0.47 | (-0.70, -0.24) | 0.12 |  | -0.33 | (-0.54, -0.11) | 0.11 |  |
|  | Poor | -0.57 | (-1.08, -0.07) | 0.26 |  | -0.75 | (-1.33, -0.17) | 0.30 |  | -0.18 | (-0.67, 0.30) | 0.25 |  |
| Immigration status | (Ref: Born in this country) |  |  |  | 0.067 |  |  |  | 0.806 |  |  |  | 0.627 |
|  | Born in another country | 0.37 | (-0.04, 0.78) | 0.21 |  | 0.02 | (-0.47, 0.52) | 0.25 |  | 0.10 | (-0.33, 0.54) | 0.22 |  |
| Age 12 religious service attendance | (Ref: Never) |  |  |  | 0.164 |  |  |  | 0.139 |  |  |  | 0.036 |
|  | At least 1/week | 0.19 | (0.01, 0.38) | 0.10 |  | 0.24 | (0.03, 0.44) | 0.11 |  | 0.26 | (0.07, 0.46) | 0.10 |  |
|  | 1-3/month | 0.13 | (-0.08, 0.34) | 0.11 |  | 0.23 | (-0.00, 0.45) | 0.12 |  | 0.19 | (-0.02, 0.40) | 0.11 |  |
|  | < 1/month | 0.10 | (-0.10, 0.30) | 0.10 |  | 0.17 | (-0.05, 0.39) | 0.11 |  | 0.15 | (-0.05, 0.36) | 0.10 |  |
| Year of birth | (Ref: 1998-2005; current age: 18-24) |  |  |  | <.001 |  |  |  | <.001 |  |  |  | <.001 |
|  | 1993-1998; age 25-29 | 0.03 | (-0.15, 0.22) | 0.09 |  | 0.18 | (-0.03, 0.38) | 0.10 |  | 0.03 | (-0.16, 0.22) | 0.10 |  |
|  | 1983-1993; age 30-39 | 0.29 | (0.14, 0.44) | 0.08 |  | 0.43 | (0.27, 0.60) | 0.08 |  | 0.24 | (0.09, 0.39) | 0.08 |  |
|  | 1973-1983; age 40-49 | 0.34 | (0.18, 0.50) | 0.08 |  | 0.45 | (0.28, 0.63) | 0.09 |  | 0.23 | (0.06, 0.39) | 0.08 |  |
|  | 1963-1973; age 50-59 | 0.22 | (0.04, 0.41) | 0.09 |  | 0.48 | (0.28, 0.68) | 0.10 |  | 0.24 | (0.04, 0.43) | 0.10 |  |
|  | 1953-1963; age 60-69 | 0.69 | (0.47, 0.91) | 0.11 |  | 0.65 | (0.40, 0.90) | 0.13 |  | 0.53 | (0.31, 0.74) | 0.11 |  |
|  | 1943-1953; age 70-79 | 0.75 | (0.36, 1.14) | 0.20 |  | 1.40 | (1.06, 1.74) | 0.17 |  | 0.84 | (0.53, 1.15) | 0.16 |  |
|  | 1943 or earlier; age 80+ | 0.78 | (-0.02, 1.58) | 0.41 |  | 1.13 | (0.40, 1.86) | 0.37 |  | 0.77 | (0.04, 1.50) | 0.37 |  |
| Gender | (Ref: Male) |  |  |  | 0.013 |  |  |  | 0.810 |  |  |  | 0.331 |
|  | Female | 0.15 | (0.04, 0.25) | 0.05 |  | 0.03 | (-0.08, 0.15) | 0.06 |  | 0.08 | (-0.03, 0.18) | 0.05 |  |
|  | Other | -0.37 | (-1.37, 0.64) | 0.51 |  | -0.11 | (-1.21, 0.99) | 0.56 |  | -0.10 | (-1.22, 1.03) | 0.57 |  |
| Religious affiliation | (Ref: No religion/Atheist/Agnostic) |  |  |  | 0.482 |  |  |  | 0.339 |  |  |  | 0.768 |
|  | Christianity | 0.06 | (-0.18, 0.30) | 0.12 |  | 0.11 | (-0.13, 0.34) | 0.12 |  | -0.05 | (-0.27, 0.17) | 0.11 |  |
|  | Collapsed affiliations with prevalence<3% | 0.17 | (-0.14, 0.47) | 0.15 |  | -0.03 | (-0.35, 0.28) | 0.16 |  | -0.11 | (-0.40, 0.19) | 0.15 |  |
| Race/ethnicity | (Ref: Plurality group) |  |  |  | 0.424 |  |  |  | <.001 |  |  |  | <.001 |
|  | Non-plurality groups | 0.04 | (-0.07, 0.15) | 0.06 |  | 0.21 | (0.09, 0.33) | 0.06 |  | 0.19 | (0.08, 0.30) | 0.06 |  |

Table S4d. Sensitivity to unmeasured confounding of childhood predictors in Brazil

|  | | Life Evaluation | | Life Satisfaction | | Happiness | |
| --- | --- | --- | --- | --- | --- | --- | --- |
| Variable | Category | E-value for Estimate | E-value for 95% CI | E-value for Estimate | E-value for 95% CI | E-value for Estimate | E-value for 95% CI |
| Relationship with mother | (Ref: Very bad/somewhat bad) |  |  |  |  |  |  |
|  | Very good/somewhat good | 1.40 | 1.00 | 1.38 | 1.00 | 1.48 | 1.15 |
| Relationship with father | (Ref: Very bad/somewhat bad) |  |  |  |  |  |  |
|  | Very good/somewhat good | 1.58 | 1.41 | 1.77 | 1.59 | 1.69 | 1.51 |
| Parent marital status | (Ref: Parents married) |  |  |  |  |  |  |
|  | Divorced | 1.31 | 1.00 | 1.14 | 1.00 | 1.25 | 1.00 |
|  | Parents were never married | 1.42 | 1.19 | 1.23 | 1.00 | 1.12 | 1.00 |
|  | One or both parents had died | 1.31 | 1.00 | 1.38 | 1.00 | 1.36 | 1.00 |
| Subjective financial status of family growing up | (Ref: Got by) |  |  |  |  |  |  |
|  | Lived comfortably | 1.67 | 1.53 | 1.48 | 1.34 | 1.48 | 1.34 |
|  | Found it difficult | 1.38 | 1.14 | 1.17 | 1.00 | 1.23 | 1.00 |
|  | Found it very difficult | 1.52 | 1.18 | 1.09 | 1.00 | 1.43 | 1.00 |
| Abuse | (Ref: No) |  |  |  |  |  |  |
|  | Yes | 1.42 | 1.23 | 1.67 | 1.51 | 1.60 | 1.43 |
| Outsider growing up | (Ref: No) |  |  |  |  |  |  |
|  | Yes | 1.31 | 1.00 | 1.77 | 1.58 | 1.79 | 1.61 |
| Self-rated health growing up | (Ref: Good) |  |  |  |  |  |  |
|  | Excellent | 1.46 | 1.28 | 1.49 | 1.33 | 1.63 | 1.47 |
|  | Very good | 1.19 | 1.00 | 1.01 | 1.00 | 1.20 | 1.00 |
|  | Fair | 1.64 | 1.38 | 1.67 | 1.41 | 1.53 | 1.26 |
|  | Poor | 1.82 | 1.19 | 1.96 | 1.32 | 1.36 | 1.00 |
| Immigration status | (Ref: Born in this country) |  |  |  |  |  |  |
|  | Born in another country | 1.59 | 1.00 | 1.10 | 1.00 | 1.25 | 1.00 |
| Age 12 religious service attendance | (Ref: Never) |  |  |  |  |  |  |
|  | At least 1/week | 1.37 | 1.05 | 1.41 | 1.12 | 1.46 | 1.20 |
|  | 1-3/month | 1.29 | 1.00 | 1.39 | 1.00 | 1.37 | 1.00 |
|  | < 1/month | 1.25 | 1.00 | 1.33 | 1.00 | 1.32 | 1.00 |
| Year of birth | (Ref: 1998-2005; current age: 18-24) |  |  |  |  |  |  |
|  | 1993-1998; age 25-29 | 1.13 | 1.00 | 1.33 | 1.00 | 1.11 | 1.00 |
|  | 1983-1993; age 30-39 | 1.49 | 1.31 | 1.62 | 1.44 | 1.43 | 1.23 |
|  | 1973-1983; age 40-49 | 1.55 | 1.35 | 1.64 | 1.45 | 1.42 | 1.19 |
|  | 1963-1973; age 50-59 | 1.41 | 1.14 | 1.67 | 1.45 | 1.43 | 1.15 |
|  | 1953-1963; age 60-69 | 1.96 | 1.70 | 1.85 | 1.59 | 1.76 | 1.52 |
|  | 1943-1953; age 70-79 | 2.03 | 1.58 | 2.74 | 2.32 | 2.14 | 1.77 |
|  | 1943 or earlier; age 80+ | 2.07 | 1.00 | 2.40 | 1.59 | 2.05 | 1.14 |
| Gender | (Ref: Male) |  |  |  |  |  |  |
|  | Female | 1.31 | 1.15 | 1.12 | 1.00 | 1.21 | 1.00 |
|  | Other | 1.59 | 1.00 | 1.25 | 1.00 | 1.24 | 1.00 |
| Religious affiliation | (Ref: No religion/Atheist/Agnostic) |  |  |  |  |  |  |
|  | Christianity | 1.18 | 1.00 | 1.24 | 1.00 | 1.16 | 1.00 |
|  | Collapsed affiliations with prevalence<3% | 1.34 | 1.00 | 1.12 | 1.00 | 1.25 | 1.00 |
| Race/ethnicity | (Ref: Plurality group) |  |  |  |  |  |  |
|  | Non-plurality groups | 1.14 | 1.00 | 1.37 | 1.21 | 1.36 | 1.21 |

Table S4e. Complete-case supplemental analysis of means by demographic category for Brazil

|  | | Life Evaluation | | | | Life Satisfaction | | | | Happiness | | | |
| --- | --- | --- | --- | --- | --- | --- | --- | --- | --- | --- | --- | --- | --- |
| Variable | Category | Mean | 95% CI | SE | Global p-value | Mean | 95% CI | SE | Global p-value | Mean | 95% CI | SE | Global p-value |
| Age group | 18-24 | 6.39 | (6.28,6.50) | 0.05 | < .001 | 6.86 | (6.74,6.99) | 0.06 | < .001 | 7.14 | (7.03,7.26) | 0.06 | < .001 |
|  | 25-29 | 6.43 | (6.28,6.58) | 0.08 |  | 7.12 | (6.97,7.26) | 0.07 |  | 7.30 | (7.17,7.44) | 0.07 |  |
|  | 30-39 | 6.66 | (6.57,6.75) | 0.05 |  | 7.34 | (7.25,7.43) | 0.05 |  | 7.46 | (7.37,7.55) | 0.05 |  |
|  | 40-49 | 6.76 | (6.65,6.86) | 0.05 |  | 7.42 | (7.31,7.52) | 0.05 |  | 7.47 | (7.37,7.57) | 0.05 |  |
|  | 50-59 | 6.75 | (6.62,6.87) | 0.07 |  | 7.55 | (7.43,7.67) | 0.06 |  | 7.59 | (7.47,7.72) | 0.07 |  |
|  | 60-69 | 7.18 | (7.01,7.35) | 0.09 |  | 7.76 | (7.59,7.93) | 0.09 |  | 7.78 | (7.62,7.93) | 0.08 |  |
|  | 70-79 | 7.33 | (7.00,7.66) | 0.17 |  | 8.35 | (8.08,8.62) | 0.14 |  | 8.05 | (7.78,8.32) | 0.14 |  |
|  | 80 or older | 7.35 | (6.66,8.05) | 0.35 |  | 8.21 | (7.72,8.70) | 0.25 |  | 8.42 | (7.94,8.90) | 0.24 |  |
| Gender | Female | 6.71 | (6.64,6.77) | 0.03 | 0.846 | 7.33 | (7.26,7.40) | 0.03 | 0.074 | 7.42 | (7.36,7.48) | 0.03 | 0.020 |
|  | Male | 6.72 | (6.65,6.79) | 0.04 |  | 7.45 | (7.37,7.52) | 0.04 |  | 7.55 | (7.48,7.62) | 0.04 |  |
|  | Other | 6.55 | (5.90,7.20) | 0.32 |  | 7.31 | (6.47,8.15) | 0.41 |  | 7.56 | (6.90,8.22) | 0.32 |  |
| Marital status | Divorced | 6.63 | (6.44,6.82) | 0.10 | < .001 | 7.26 | (7.07,7.45) | 0.10 | < .001 | 7.45 | (7.28,7.61) | 0.08 | < .001 |
|  | Domestic partner | 6.56 | (6.45,6.66) | 0.05 |  | 7.30 | (7.19,7.41) | 0.06 |  | 7.36 | (7.26,7.46) | 0.05 |  |
|  | Married | 7.13 | (7.05,7.21) | 0.04 |  | 7.82 | (7.74,7.90) | 0.04 |  | 7.87 | (7.80,7.94) | 0.04 |  |
|  | Separated | 5.98 | (5.71,6.25) | 0.14 |  | 6.83 | (6.57,7.08) | 0.13 |  | 6.97 | (6.73,7.22) | 0.12 |  |
|  | Single/Never been married | 6.40 | (6.32,6.48) | 0.04 |  | 6.99 | (6.90,7.08) | 0.05 |  | 7.16 | (7.07,7.24) | 0.04 |  |
|  | Widowed | 7.32 | (7.00,7.65) | 0.17 |  | 8.02 | (7.73,8.30) | 0.15 |  | 7.90 | (7.60,8.21) | 0.16 |  |
| Employment | Employed for an employer | 6.86 | (6.78,6.94) | 0.04 | < .001 | 7.50 | (7.42,7.58) | 0.04 | < .001 | 7.58 | (7.50,7.65) | 0.04 | < .001 |
|  | Homemaker | 6.76 | (6.59,6.94) | 0.09 |  | 7.56 | (7.40,7.72) | 0.08 |  | 7.61 | (7.45,7.76) | 0.08 |  |
|  | None of these/Other | 6.71 | (6.45,6.97) | 0.13 |  | 7.32 | (7.05,7.58) | 0.13 |  | 7.45 | (7.18,7.71) | 0.13 |  |
|  | Retired | 7.32 | (7.16,7.49) | 0.09 |  | 8.01 | (7.85,8.16) | 0.08 |  | 7.97 | (7.82,8.11) | 0.07 |  |
|  | Self-employed | 6.74 | (6.65,6.84) | 0.05 |  | 7.41 | (7.32,7.51) | 0.05 |  | 7.56 | (7.47,7.65) | 0.05 |  |
|  | Student | 6.64 | (6.46,6.83) | 0.09 |  | 7.04 | (6.83,7.26) | 0.11 |  | 7.27 | (7.07,7.46) | 0.10 |  |
|  | Unemployed and looking for a job | 6.04 | (5.92,6.17) | 0.06 |  | 6.77 | (6.64,6.90) | 0.07 |  | 6.93 | (6.81,7.06) | 0.06 |  |
| Religious service attendance | A few times a year | 6.58 | (6.50,6.66) | 0.04 | < .001 | 7.28 | (7.20,7.36) | 0.04 | < .001 | 7.36 | (7.28,7.44) | 0.04 | < .001 |
|  | More than once a week | 7.29 | (7.17,7.41) | 0.06 |  | 8.01 | (7.89,8.12) | 0.06 |  | 8.12 | (8.01,8.22) | 0.05 |  |
|  | Never | 6.35 | (6.25,6.45) | 0.05 |  | 6.86 | (6.75,6.97) | 0.06 |  | 6.99 | (6.89,7.10) | 0.05 |  |
|  | Once a week | 6.90 | (6.78,7.01) | 0.06 |  | 7.60 | (7.48,7.71) | 0.06 |  | 7.71 | (7.60,7.82) | 0.06 |  |
|  | One to three times a month | 6.65 | (6.49,6.80) | 0.08 |  | 7.43 | (7.29,7.57) | 0.07 |  | 7.48 | (7.34,7.62) | 0.07 |  |
| Education | Up to 8 years | 6.80 | (6.67,6.92) | 0.06 | < .001 | 7.72 | (7.61,7.84) | 0.06 | < .001 | 7.76 | (7.65,7.87) | 0.06 | < .001 |
|  | 16+ years | 7.04 | (6.95,7.14) | 0.05 |  | 7.41 | (7.32,7.51) | 0.05 |  | 7.50 | (7.41,7.60) | 0.05 |  |
|  | 9 to 15 years | 6.58 | (6.52,6.64) | 0.03 |  | 7.24 | (7.18,7.31) | 0.03 |  | 7.37 | (7.31,7.43) | 0.03 |  |
| Immigration status | Born in another country | 7.14 | (6.79,7.49) | 0.18 | 0.016 | 7.51 | (7.10,7.92) | 0.21 | 0.533 | 7.48 | (7.08,7.87) | 0.20 | 0.975 |
|  | Born in this country | 6.71 | (6.66,6.76) | 0.03 |  | 7.38 | (7.33,7.43) | 0.03 |  | 7.48 | (7.44,7.53) | 0.02 |  |
| Religious affiliation | Buddhism | 6.92 | (6.14,7.71) | 0.38 | < .001 | 6.79 | (5.90,7.68) | 0.43 | < .001 | 7.24 | (6.42,8.07) | 0.39 | < .001 |
|  | Christianity | 6.81 | (6.75,6.86) | 0.03 |  | 7.53 | (7.48,7.59) | 0.03 |  | 7.62 | (7.57,7.67) | 0.03 |  |
|  | Confucianism | 8.43 | * | * |  | 7.99 | * | * |  | 8.05 | * | * |  |
|  | Hinduism | 6.23 | * | * |  | 3.23 | * | * |  | 4.93 | * | * |  |
|  | Islam | 7.80 | * | * |  | 8.25 | * | * |  | 8.77 | * | * |  |
|  | Judaism | 6.42 | (5.55,7.29) | 0.40 |  | 6.18 | (4.63,7.74) | 0.72 |  | 6.90 | (5.59,8.21) | 0.61 |  |
|  | No religion/Atheist/Agnostic | 6.27 | (6.14,6.40) | 0.07 |  | 6.75 | (6.61,6.89) | 0.07 |  | 6.92 | (6.79,7.05) | 0.07 |  |
|  | Primal, Animist, or Folk religion | 7.58 | (0.00,662663905793892526444559466496.00) | 0.66 |  | 7.14 | (0.00,870137853411920474970584514560.00) | 0.87 |  | 8.01 | (0.00,559925846069562741118560370688.00) | 0.56 |  |
|  | Some other religion | 6.62 | (6.14,7.10) | 0.24 |  | 7.21 | (6.61,7.80) | 0.30 |  | 6.95 | (6.42,7.48) | 0.27 |  |
|  | Taoism | 7.08 | * | * |  | 7.64 | * | * |  | 7.53 | * | * |  |
|  | Baha’i | 10.00 | * | * |  | 10.00 | * | * |  | 9.65 | * | * |  |
|  | Jainism | 5.89 | * | * |  | 3.83 | * | * |  | 6.89 | * | * |  |
|  | Shinto | 7.33 | * | * |  | 6.34 | * | * |  | 6.33 | * | * |  |
|  | Spiritism | 6.70 | (6.49,6.91) | 0.11 |  | 7.24 | (7.03,7.44) | 0.10 |  | 7.28 | (7.06,7.49) | 0.11 |  |
|  | Umbanda, Candomblé, and other African-derived religions | 6.42 | (6.19,6.65) | 0.12 |  | 7.00 | (6.77,7.24) | 0.12 |  | 7.20 | (6.98,7.42) | 0.11 |  |

Table S4f. Complete-case supplemental analysis of childhood predictors regression analysis results for Brazil

|  | | Life Evaluation | | | | Life Satisfaction | | | | Happiness | | | |
| --- | --- | --- | --- | --- | --- | --- | --- | --- | --- | --- | --- | --- | --- |
| Variable | Category | Est | 95% CI | SE | Global p-value | Est | 95% CI | SE | Global p-value | Est | 95% CI | SE | Global p-value |
| Relationship with mother | (Ref: Very bad/somewhat bad) |  |  |  | 0.365 |  |  |  | 0.720 |  |  |  | 0.098 |
|  | Very good/somewhat good | 0.09 | (-0.11,0.29) | 0.10 |  | 0.04 | (-0.17,0.25) | 0.11 |  | 0.17 | (-0.03,0.38) | 0.10 |  |
| Relationship with father | (Ref: Very bad/somewhat bad) |  |  |  | <.001 |  |  |  | <.001 |  |  |  | <.001 |
|  | Very good/somewhat good | 0.33 | (0.19,0.46) | 0.07 |  | 0.44 | (0.30,0.57) | 0.07 |  | 0.37 | (0.24,0.51) | 0.07 |  |
| Parent marital status | (Ref: Parents married) |  |  |  | 0.007 |  |  |  | 0.418 |  |  |  | 0.522 |
|  | No, one or both of them had died | 0.00 | (-0.28,0.28) | 0.14 |  | -0.06 | (-0.34,0.22) | 0.14 |  | -0.02 | (-0.27,0.23) | 0.13 |  |
|  | No, they were never married | -0.06 | (-0.23,0.12) | 0.09 |  | -0.01 | (-0.19,0.16) | 0.09 |  | 0.08 | (-0.09,0.25) | 0.09 |  |
|  | Yes, married | 0.18 | (0.04,0.32) | 0.07 |  | 0.08 | (-0.06,0.23) | 0.07 |  | 0.09 | (-0.05,0.23) | 0.07 |  |
| Subjective financial status of family growing up | (Ref: Got by) |  |  |  | <.001 |  |  |  | <.001 |  |  |  | <.001 |
|  | Found it difficult | -0.19 | (-0.33,-0.05) | 0.07 |  | -0.06 | (-0.20,0.09) | 0.07 |  | -0.04 | (-0.17,0.10) | 0.07 |  |
|  | Found it very difficult | -0.07 | (-0.28,0.15) | 0.11 |  | 0.21 | (-0.00,0.42) | 0.11 |  | 0.07 | (-0.14,0.28) | 0.11 |  |
|  | Lived comfortably | 0.42 | (0.31,0.53) | 0.06 |  | 0.21 | (0.10,0.32) | 0.06 |  | 0.28 | (0.18,0.39) | 0.05 |  |
| Abuse | (Ref: No) |  |  |  | <.001 |  |  |  | <.001 |  |  |  | <.001 |
|  | Yes | -0.24 | (-0.36,-0.11) | 0.06 |  | -0.45 | (-0.57,-0.32) | 0.07 |  | -0.43 | (-0.56,-0.31) | 0.06 |  |
| Outsider growing up | (Ref: No) |  |  |  | 0.363 |  |  |  | <.001 |  |  |  | <.001 |
|  | Yes | -0.07 | (-0.21,0.08) | 0.07 |  | -0.44 | (-0.59,-0.29) | 0.08 |  | -0.49 | (-0.64,-0.35) | 0.07 |  |
| Self-rated health growing up | (Ref: Good) |  |  |  | <.001 |  |  |  | <.001 |  |  |  | <.001 |
|  | Excellent | 0.26 | (0.13,0.39) | 0.07 |  | 0.38 | (0.25,0.50) | 0.06 |  | 0.41 | (0.29,0.53) | 0.06 |  |
|  | Fair | -0.37 | (-0.56,-0.17) | 0.10 |  | -0.30 | (-0.50,-0.11) | 0.10 |  | -0.26 | (-0.45,-0.07) | 0.10 |  |
|  | Poor | -0.40 | (-0.86,0.07) | 0.24 |  | -0.29 | (-0.80,0.22) | 0.26 |  | 0.05 | (-0.37,0.47) | 0.21 |  |
|  | Very good | 0.03 | (-0.10,0.16) | 0.07 |  | 0.04 | (-0.09,0.17) | 0.07 |  | 0.07 | (-0.06,0.20) | 0.07 |  |
| Immigration status | (Ref: Born in this country) |  |  |  | 0.040 |  |  |  | 0.692 |  |  |  | 0.746 |
|  | Born in another country | 0.35 | (0.02,0.69) | 0.17 |  | 0.08 | (-0.31,0.47) | 0.20 |  | -0.06 | (-0.44,0.31) | 0.19 |  |
| Age 12 religious service attendance | (Ref: Never) |  |  |  | 0.096 |  |  |  | 0.143 |  |  |  | 0.018 |
|  | At least once a week | 0.17 | (0.00,0.34) | 0.09 |  | 0.08 | (-0.09,0.26) | 0.09 |  | 0.16 | (-0.00,0.33) | 0.08 |  |
|  | Less than once a month | 0.05 | (-0.13,0.24) | 0.09 |  | -0.05 | (-0.24,0.13) | 0.09 |  | -0.01 | (-0.19,0.17) | 0.09 |  |
|  | One to three times a month | 0.11 | (-0.08,0.29) | 0.10 |  | 0.02 | (-0.17,0.22) | 0.10 |  | 0.07 | (-0.11,0.26) | 0.09 |  |
| Year of birth | (Ref: 1998-2005; current age: 18-24) |  |  |  | <.001 |  |  |  | <.001 |  |  |  | <.001 |
|  | 1993-1998; age 25-29 | 0.05 | (-0.12,0.23) | 0.09 |  | 0.21 | (0.03,0.40) | 0.09 |  | 0.13 | (-0.04,0.29) | 0.09 |  |
|  | 1983-1993; age 30-39 | 0.28 | (0.14,0.42) | 0.07 |  | 0.41 | (0.26,0.56) | 0.08 |  | 0.26 | (0.12,0.40) | 0.07 |  |
|  | 1973-1983; age 40-49 | 0.36 | (0.21,0.51) | 0.08 |  | 0.46 | (0.30,0.62) | 0.08 |  | 0.25 | (0.10,0.40) | 0.08 |  |
|  | 1963-1973; age 50-59 | 0.31 | (0.14,0.48) | 0.09 |  | 0.54 | (0.37,0.72) | 0.09 |  | 0.34 | (0.16,0.51) | 0.09 |  |
|  | 1953-1963; age 60-69 | 0.73 | (0.53,0.94) | 0.10 |  | 0.74 | (0.52,0.96) | 0.11 |  | 0.50 | (0.31,0.70) | 0.10 |  |
|  | 1943-1953; age 70-79 | 0.85 | (0.49,1.20) | 0.18 |  | 1.32 | (1.02,1.62) | 0.15 |  | 0.78 | (0.49,1.07) | 0.15 |  |
|  | 1943 or earlier; age 80+ | 0.92 | (0.21,1.62) | 0.36 |  | 1.19 | (0.64,1.74) | 0.28 |  | 1.19 | (0.65,1.73) | 0.27 |  |
| Gender | (Ref: Male) |  |  |  | 0.006 |  |  |  | 0.182 |  |  |  | 0.215 |
|  | Male | -0.16 | (-0.26,-0.06) | 0.05 |  | -0.09 | (-0.19,0.01) | 0.05 |  | -0.07 | (-0.17,0.02) | 0.05 |  |
|  | Other | -0.14 | (-0.95,0.67) | 0.41 |  | 0.15 | (-0.58,0.88) | 0.37 |  | 0.32 | (-0.46,1.10) | 0.40 |  |
| Religious affiliation | (Ref: No religion/Atheist/Agnostic) |  |  |  | 0.692 |  |  |  | 0.514 |  |  |  | 0.932 |
|  | Christianity | -0.02 | (-0.24,0.19) | 0.11 |  | 0.09 | (-0.12,0.29) | 0.10 |  | -0.03 | (-0.22,0.17) | 0.10 |  |
|  | Christianity | -0.02 | (-0.24,0.19) | 0.11 |  | 0.09 | (-0.12,0.29) | 0.10 |  | -0.03 | (-0.22,0.17) | 0.10 |  |
|  | Collapsed affiliations with prevalence<3% | 0.06 | (-0.22,0.34) | 0.14 |  | -0.00 | (-0.28,0.28) | 0.14 |  | -0.00 | (-0.26,0.26) | 0.13 |  |
| Race/ethnicity | (Ref: Plurality group) |  |  |  | 0.111 |  |  |  | <.001 |  |  |  | <.001 |
|  | Non-plurality groups | 0.08 | (-0.02,0.18) | 0.05 |  | 0.22 | (0.12,0.31) | 0.05 |  | 0.22 | (0.12,0.31) | 0.05 |  |

Table S4g. Complete-case supplemental analysis of sensitivity to unmeasured confounding of childhood predictors in Brazil

|  | | Life Evaluation | | Life Satisfaction | | Happiness | |
| --- | --- | --- | --- | --- | --- | --- | --- |
| Variable | Category | E-value for Estimate | E-value for 95% CI | E-value for Estimate | E-value for 95% CI | E-value for Estimate | E-value for 95% CI |
| Relationship with mother | (Ref: Very bad/somewhat bad) |  |  |  |  |  |  |
|  | Very good/somewhat good | 1.24 | 1.00 | 1.15 | 1.00 | 1.37 | 1.00 |
| Relationship with father | (Ref: Very bad/somewhat bad) |  |  |  |  |  |  |
|  | Very good/somewhat good | 1.57 | 1.39 | 1.70 | 1.53 | 1.64 | 1.47 |
| Parent marital status | (Ref: Parents married) |  |  |  |  |  |  |
|  | No, one or both of them had died | 1.02 | 1.00 | 1.19 | 1.00 | 1.10 | 1.00 |
|  | No, they were never married | 1.18 | 1.00 | 1.07 | 1.00 | 1.23 | 1.00 |
|  | Yes, married | 1.38 | 1.14 | 1.23 | 1.00 | 1.25 | 1.00 |
| Subjective financial status of family growing up | (Ref: Got by) |  |  |  |  |  |  |
|  | Found it difficult | 1.39 | 1.17 | 1.18 | 1.00 | 1.15 | 1.00 |
|  | Found it very difficult | 1.20 | 1.00 | 1.41 | 1.00 | 1.20 | 1.00 |
|  | Lived comfortably | 1.69 | 1.55 | 1.41 | 1.25 | 1.52 | 1.38 |
| Abuse | (Ref: No) |  |  |  |  |  |  |
|  | Yes | 1.45 | 1.28 | 1.71 | 1.55 | 1.71 | 1.55 |
| Outsider growing up | (Ref: No) |  |  |  |  |  |  |
|  | Yes | 1.20 | 1.00 | 1.70 | 1.51 | 1.79 | 1.61 |
| Self-rated health growing up | (Ref: Good) |  |  |  |  |  |  |
|  | Excellent | 1.48 | 1.31 | 1.62 | 1.47 | 1.69 | 1.53 |
|  | Fair | 1.62 | 1.36 | 1.53 | 1.27 | 1.49 | 1.22 |
|  | Poor | 1.66 | 1.00 | 1.52 | 1.00 | 1.18 | 1.00 |
|  | Very good | 1.13 | 1.00 | 1.15 | 1.00 | 1.21 | 1.00 |
| Immigration status | (Ref: Born in this country) |  |  |  |  |  |  |
|  | Born in another country | 1.60 | 1.09 | 1.22 | 1.00 | 1.20 | 1.00 |
| Age 12 religious service attendance | (Ref: Never) |  |  |  |  |  |  |
|  | At least once a week | 1.37 | 1.04 | 1.23 | 1.00 | 1.36 | 1.00 |
|  | Less than once a month | 1.17 | 1.00 | 1.18 | 1.00 | 1.06 | 1.00 |
|  | One to three times a month | 1.27 | 1.00 | 1.11 | 1.00 | 1.22 | 1.00 |
| Year of birth | (Ref: 1998-2005; current age: 18-24) |  |  |  |  |  |  |
|  | 1993-1998; age 25-29 | 1.18 | 1.00 | 1.42 | 1.13 | 1.30 | 1.00 |
|  | 1983-1993; age 30-39 | 1.51 | 1.32 | 1.66 | 1.47 | 1.49 | 1.30 |
|  | 1973-1983; age 40-49 | 1.61 | 1.41 | 1.72 | 1.53 | 1.47 | 1.26 |
|  | 1963-1973; age 50-59 | 1.54 | 1.32 | 1.83 | 1.61 | 1.59 | 1.36 |
|  | 1953-1963; age 60-69 | 2.08 | 1.82 | 2.08 | 1.80 | 1.80 | 1.55 |
|  | 1943-1953; age 70-79 | 2.23 | 1.77 | 2.89 | 2.45 | 2.17 | 1.79 |
|  | 1943 or earlier; age 80+ | 2.33 | 1.42 | 2.69 | 1.95 | 2.77 | 2.00 |
| Gender | (Ref: Male) |  |  |  |  |  |  |
|  | Male | 1.35 | 1.19 | 1.24 | 1.00 | 1.22 | 1.00 |
|  | Other | 1.32 | 1.00 | 1.33 | 1.00 | 1.56 | 1.00 |
| Religious affiliation | (Ref: No religion/Atheist/Agnostic) |  |  |  |  |  |  |
|  | Christianity | 1.11 | 1.00 | 1.23 | 1.00 | 1.12 | 1.00 |
|  | Christianity | 1.11 | 1.00 | 1.23 | 1.00 | 1.12 | 1.00 |
|  | Collapsed affiliations with prevalence<3% | 1.19 | 1.00 | 1.03 | 1.00 | 1.00 | 1.00 |
| Race/ethnicity | (Ref: Plurality group) |  |  |  |  |  |  |
|  | Non-plurality groups | 1.22 | 1.00 | 1.42 | 1.28 | 1.44 | 1.30 |

# Tables S5a-g: Egypt

Table S5a. Nationally representative descriptive statistics for Egypt

| **Characteristic** | **N = 4,729**1 |
| --- | --- |
| **Age group** |  |
| 1998-2005; age 18-24 | 960 (20%) |
| 1993-1998; age 25-29 | 607 (13%) |
| 1983-1993; age 30-39 | 1,204 (25%) |
| 1973-1983; age 40-49 | 897 (19%) |
| 1963-1973; age 50-59 | 613 (13%) |
| 1953-1963; age 60-69 | 387 (8.2%) |
| 1943-1953; age 70-79 | 54 (1.1%) |
| 1943 or earlier; age 80+ | 7 (0.2%) |
| (Missing) | 0 (0%) |
| **Gender** |  |
| Male | 2,394 (51%) |
| Female | 2,334 (49%) |
| Other | 0 (0%) |
| (Missing) | 0 (<0.1%) |
| **Race/Ethnicity** |  |
| Arab | 4,585 (97%) |
| Bedouin Arab | 4 (<0.1%) |
| Greek | 1 (<0.1%) |
| Nubian | 27 (0.6%) |
| Turkish | 9 (0.2%) |
| (Missing) | 102 (2.2%) |
| **Respondent Marital status** |  |
| Married | 3,387 (72%) |
| Separated | 39 (0.8%) |
| Divorced | 101 (2.1%) |
| Widowed | 238 (5.0%) |
| Single, never married | 947 (20%) |
| Domestic Partner | 0 (0%) |
| (Missing) | 17 (0.4%) |
| **Employment** |  |
| Employed for an employer | 1,267 (27%) |
| Self-employed | 892 (19%) |
| Retired | 253 (5.4%) |
| Student | 297 (6.3%) |
| Homemaker | 1,772 (37%) |
| Unemployed and looking for a job | 224 (4.7%) |
| None of these/Other | 21 (0.4%) |
| (Missing) | 3 (<0.1%) |
| **Religious service attendance as an adult (now)** |  |
| More than 1/week | 839 (18%) |
| 1/week | 960 (20%) |
| 1-3/month | 368 (7.8%) |
| A few times a year | 458 (9.7%) |
| Never | 2,091 (44%) |
| (Missing) | 12 (0.3%) |
| **Education (years)** |  |
| Up to 8 years | 2,486 (53%) |
| 9-15 years | 1,599 (34%) |
| 16+ years | 643 (14%) |
| (Missing) | 1 (<0.1%) |
| **Immigration status** |  |
| Born in this country | 4,713 (100%) |
| Born in another country | 16 (0.3%) |
| (Missing) | 1 (<0.1%) |
| **Religious affiliation as an adult (now)** |  |
| Christianity | 120 (2.5%) |
| Islam | 4,607 (97%) |
| Hinduism | 0 (0%) |
| Buddhism | 0 (0%) |
| Judaism | 0 (0%) |
| Sikhism | 0 (0%) |
| Baha'i | 0 (0%) |
| Jainism | 0 (0%) |
| Shinto | 0 (0%) |
| Taoism | 0 (<0.1%) |
| Confucianism | 0 (0%) |
| Primal, Animist, or Folk religion | 0 (0%) |
| Spiritism | 0 (0%) |
| Umbanda, Candomble, and other African-derived religions | 0 (0%) |
| Chinese folk/traditional religion | 0 (0%) |
| Some other religion | 0 (0%) |
| No religion/Atheist/Agnostic | 0 (0%) |
| (Missing) | 1 (<0.1%) |
| **Relationship with mother growing up** |  |
| Very good | 4,110 (87%) |
| Somewhat good | 505 (11%) |
| Somewhat bad | 21 (0.4%) |
| Very bad | 10 (0.2%) |
| Does not apply | 83 (1.8%) |
| (Missing) | 0 (0%) |
| **Relationship with father growing up** |  |
| Very good | 3,713 (79%) |
| Somewhat good | 683 (14%) |
| Somewhat bad | 56 (1.2%) |
| Very bad | 30 (0.6%) |
| Does not apply | 233 (4.9%) |
| (Missing) | 14 (0.3%) |
| **Parent marital status at age 12** |  |
| Parents married | 4,049 (86%) |
| Divorced | 131 (2.8%) |
| Parents were never married | 9 (0.2%) |
| One or both parents had died | 485 (10%) |
| (Missing) | 55 (1.2%) |
| **Subjective financial status of family growing up** |  |
| Lived comfortably | 1,251 (26%) |
| Got by | 2,352 (50%) |
| Found it difficult | 857 (18%) |
| Found it very difficult | 268 (5.7%) |
| (Missing) | 1 (<0.1%) |
| **Abuse** |  |
| Yes | 405 (8.6%) |
| No | 4,293 (91%) |
| (Missing) | 30 (0.6%) |
| **Outsider growing up** |  |
| Yes | 260 (5.5%) |
| No | 4,456 (94%) |
| (Missing) | 13 (0.3%) |
| **Self-rated health growing up** |  |
| Excellent | 2,687 (57%) |
| Very good | 1,174 (25%) |
| Good | 497 (11%) |
| Fair | 265 (5.6%) |
| Poor | 106 (2.2%) |
| (Missing) | 1 (<0.1%) |
| **Age 12 religious service attendance** |  |
| At least 1/week | 2,307 (49%) |
| 1-3/month | 570 (12%) |
| <1/month | 629 (13%) |
| Never | 1,165 (25%) |
| (Missing) | 57 (1.2%) |
| **Religious affiliation at age 12** |  |
| Christianity | 123 (2.6%) |
| Islam | 4,602 (97%) |
| Hinduism | 0 (0%) |
| Buddhism | 0 (0%) |
| Judaism | 0 (0%) |
| Sikhism | 0 (0%) |
| Baha'i | 0 (0%) |
| Jainism | 1 (<0.1%) |
| Shinto | 0 (0%) |
| Taoism | 0 (<0.1%) |
| Confucianism | 0 (0%) |
| Primal, Animist, or Folk religion | 0 (0%) |
| Spiritism | 0 (0%) |
| Umbanda, Candomble, and other African-derived religions | 0 (0%) |
| Chinese folk/traditional religion | 0 (0%) |
| Some other religion | 0 (0%) |
| No religion/Atheist/Agnostic | 0 (0%) |
| (Missing) | 3 (<0.1%) |
| 1n (%) | |

Table S5b. Means by demographic category for Egypt

|  | | Life Evaluation | | | | Life Satisfaction | | | | Happiness | | | |
| --- | --- | --- | --- | --- | --- | --- | --- | --- | --- | --- | --- | --- | --- |
| Variable | Category | Mean | 95% CI | SE | Global p-value | Mean | 95% CI | SE | Global p-value | Mean | 95% CI | SE | Global p-value |
| Age group | 18-24 | 5.43 | (5.21,5.65) | 0.11 | < .001 | 7.87 | (7.64,8.10) | 0.12 | 0.038 | 6.32 | (6.07,6.57) | 0.13 | 0.013 |
|  | 25-29 | 5.14 | (4.83,5.46) | 0.16 |  | 7.75 | (7.50,8.01) | 0.13 |  | 6.28 | (6.03,6.54) | 0.13 |  |
|  | 30-39 | 4.75 | (4.58,4.92) | 0.09 |  | 7.61 | (7.44,7.78) | 0.09 |  | 5.89 | (5.68,6.10) | 0.11 |  |
|  | 40-49 | 4.75 | (4.53,4.98) | 0.12 |  | 7.60 | (7.38,7.82) | 0.11 |  | 6.21 | (5.99,6.43) | 0.11 |  |
|  | 50-59 | 5.12 | (4.87,5.36) | 0.13 |  | 7.60 | (7.33,7.86) | 0.14 |  | 6.23 | (5.93,6.52) | 0.15 |  |
|  | 60-69 | 5.30 | (4.87,5.74) | 0.22 |  | 7.82 | (7.46,8.18) | 0.18 |  | 6.27 | (5.86,6.67) | 0.21 |  |
|  | 70-79 | 5.65 | (4.38,6.91) | 0.63 |  | 7.15 | (5.79,8.50) | 0.67 |  | 6.96 | (5.81,8.12) | 0.57 |  |
|  | 80 or older | 5.24 | * | * |  | 8.89 | * | * |  | 7.12 | * | * |  |
| Gender | Male | 4.79 | (4.63,4.96) | 0.08 | < .001 | 7.48 | (7.32,7.63) | 0.08 | < .001 | 6.04 | (5.86,6.21) | 0.09 | 0.006 |
|  | Female | 5.30 | (5.18,5.42) | 0.06 |  | 7.91 | (7.77,8.04) | 0.07 |  | 6.32 | (6.18,6.47) | 0.07 |  |
| Marital status | Married | 5.00 | (4.87,5.12) | 0.06 | 0.004 | 7.67 | (7.55,7.80) | 0.06 | 0.450 | 6.28 | (6.13,6.43) | 0.08 | < .001 |
|  | Separated | 4.26 | (3.18,5.34) | 0.53 |  | 7.45 | (6.07,8.83) | 0.68 |  | 4.91 | (3.70,6.12) | 0.59 |  |
|  | Divorced | 4.59 | (3.95,5.24) | 0.33 |  | 7.69 | (6.91,8.47) | 0.39 |  | 4.88 | (4.12,5.64) | 0.38 |  |
|  | Widowed | 4.65 | (4.23,5.06) | 0.21 |  | 8.00 | (7.63,8.37) | 0.19 |  | 5.71 | (5.28,6.14) | 0.22 |  |
|  | Never | 5.39 | (5.15,5.63) | 0.12 |  | 7.69 | (7.48,7.90) | 0.11 |  | 6.12 | (5.88,6.35) | 0.12 |  |
| Employment | Employed for an employer | 4.96 | (4.74,5.18) | 0.11 | < .001 | 7.56 | (7.34,7.77) | 0.11 | 0.024 | 6.06 | (5.82,6.30) | 0.12 | 0.148 |
|  | Self-employed | 4.70 | (4.46,4.94) | 0.12 |  | 7.72 | (7.48,7.96) | 0.12 |  | 6.03 | (5.77,6.29) | 0.13 |  |
|  | Retired | 4.92 | (4.35,5.49) | 0.29 |  | 7.43 | (6.95,7.91) | 0.24 |  | 6.30 | (5.79,6.80) | 0.26 |  |
|  | Student | 5.60 | (5.27,5.94) | 0.17 |  | 7.90 | (7.52,8.28) | 0.19 |  | 6.40 | (6.10,6.70) | 0.15 |  |
|  | Homemaker | 5.23 | (5.08,5.38) | 0.08 |  | 7.83 | (7.67,7.98) | 0.08 |  | 6.29 | (6.13,6.46) | 0.08 |  |
|  | Unemployed and looking for a job | 4.78 | (4.33,5.22) | 0.23 |  | 7.19 | (6.72,7.67) | 0.24 |  | 6.04 | (5.58,6.50) | 0.23 |  |
|  | None of these/Other | 5.21 | (3.50,6.93) | 0.78 |  | 8.59 | (7.19,9.98) | 0.61 |  | 6.95 | (5.63,8.27) | 0.60 |  |
| Religious service attendance | More than 1/week | 5.37 | (5.10,5.63) | 0.13 | 0.052 | 7.62 | (7.36,7.88) | 0.13 | 0.230 | 6.28 | (6.01,6.56) | 0.14 | 0.917 |
|  | 1/week | 4.89 | (4.62,5.16) | 0.14 |  | 7.59 | (7.37,7.81) | 0.11 |  | 6.11 | (5.83,6.39) | 0.14 |  |
|  | 1-3/month | 4.83 | (4.50,5.16) | 0.17 |  | 7.42 | (6.98,7.86) | 0.22 |  | 6.14 | (5.75,6.53) | 0.20 |  |
|  | A few times a year | 5.14 | (4.85,5.43) | 0.15 |  | 7.86 | (7.56,8.17) | 0.15 |  | 6.16 | (5.87,6.45) | 0.15 |  |
|  | Never | 5.00 | (4.85,5.15) | 0.08 |  | 7.77 | (7.63,7.91) | 0.07 |  | 6.18 | (6.01,6.34) | 0.08 |  |
| Education | Up to 8 years | 4.76 | (4.60,4.91) | 0.08 | < .001 | 7.53 | (7.36,7.70) | 0.09 | 0.004 | 6.00 | (5.80,6.20) | 0.10 | < .001 |
|  | 9-15 years | 5.21 | (5.07,5.34) | 0.07 |  | 7.85 | (7.73,7.97) | 0.06 |  | 6.21 | (6.09,6.34) | 0.06 |  |
|  | 16+ years | 5.75 | (5.55,5.95) | 0.10 |  | 7.91 | (7.67,8.16) | 0.12 |  | 6.78 | (6.54,7.02) | 0.12 |  |
| Immigration status | Born in this country | 5.04 | (4.94,5.15) | 0.06 | 0.635 | 7.69 | (7.58,7.80) | 0.05 | 0.635 | 6.18 | (6.05,6.31) | 0.07 | 0.275 |
|  | Born in another country | 4.96 | (3.34,6.59) | 0.69 |  | 7.35 | (5.81,8.90) | 0.70 |  | 5.27 | (3.44,7.10) | 0.83 |  |
| Religious affiliation | Christianity | 5.49 | (4.86,6.11) | 0.32 | < .001 | 7.14 | (6.29,7.99) | 0.43 | < .001 | 6.29 | (5.60,6.99) | 0.35 | < .001 |
|  | Islam | 5.03 | (4.92,5.14) | 0.06 |  | 7.71 | (7.60,7.81) | 0.06 |  | 6.18 | (6.05,6.31) | 0.07 |  |
|  | Taoism | 2.00 | * | * |  | 2.00 | * | * |  | 0.00 | * | * |  |
| Race/Ethnicity | Arab | 5.04 | (4.94,5.15) | 0.05 | 0.011 | 7.69 | (7.58,7.80) | 0.05 | < .001 | 6.18 | (6.05,6.31) | 0.07 | < .001 |
|  | Turkish | 5.63 | (0.81,10.0***ǂ***) | 1.40 |  | 7.56 | (2.02,10.0***ǂ***) | 1.68 |  | 5.39 | (1.39,9.39) | 1.16 |  |
|  | Greek | 5.00 | * | * |  | 8.26 | * | * |  | 5.00 | * | * |  |
|  | Bedouin Arab | 4.97 | * | * |  | 4.34 | * | * |  | 3.71 | * | * |  |
|  | Nubian | 4.97 | (4.33,5.60) | 0.30 |  | 8.15 | (7.76,8.55) | 0.19 |  | 6.93 | (6.51,7.36) | 0.20 |  |

Table S5c. Childhood predictors regression analysis results for Egypt

|  | | Life Evaluation | | | | Life Satisfaction | | | | Happiness | | | |
| --- | --- | --- | --- | --- | --- | --- | --- | --- | --- | --- | --- | --- | --- |
| Variable | Category | Est | 95% CI | SE | Global p-value | Est | 95% CI | SE | Global p-value | Est | 95% CI | SE | Global p-value |
| Relationship with mother | (Ref: Very bad/somewhat bad) |  |  |  | 0.387 |  |  |  | 0.884 |  |  |  | 0.207 |
|  | Very good/somewhat good | 0.49 | (-0.62, 1.60) | 0.56 |  | -0.07 | (-1.22, 1.07) | 0.58 |  | 0.75 | (-0.41, 1.91) | 0.59 |  |
| Relationship with father | (Ref: Very bad/somewhat bad) |  |  |  | 0.430 |  |  |  | 0.326 |  |  |  | 0.054 |
|  | Very good/somewhat good | -0.25 | (-0.91, 0.40) | 0.33 |  | -0.34 | (-1.04, 0.37) | 0.36 |  | -0.56 | (-1.12, 0.01) | 0.29 |  |
| Parent marital status | (Ref: Parents married) |  |  |  | 0.097 |  |  |  | 0.919 |  |  |  | 0.852 |
|  | Divorced | -0.28 | (-0.94, 0.39) | 0.34 |  | 0.07 | (-0.59, 0.73) | 0.34 |  | -0.24 | (-0.95, 0.47) | 0.36 |  |
|  | Parents were never married | 1.21 | (-0.06, 2.48) | 0.64 |  | 0.20 | (-0.79, 1.20) | 0.51 |  | -0.06 | (-1.05, 0.93) | 0.50 |  |
|  | One or both parents had died | -0.29 | (-0.67, 0.09) | 0.19 |  | 0.11 | (-0.31, 0.54) | 0.22 |  | -0.08 | (-0.50, 0.35) | 0.22 |  |
| Subjective financial status of family growing up | (Ref: Got by) |  |  |  | 0.009 |  |  |  | 0.127 |  |  |  | 0.004 |
|  | Lived comfortably | 0.15 | (-0.08, 0.38) | 0.12 |  | 0.03 | (-0.22, 0.28) | 0.13 |  | 0.25 | (0.01, 0.49) | 0.12 |  |
|  | Found it difficult | -0.38 | (-0.64, -0.12) | 0.13 |  | -0.32 | (-0.64, 0.00) | 0.17 |  | -0.32 | (-0.62, -0.02) | 0.15 |  |
|  | Found it very difficult | -0.15 | (-0.53, 0.24) | 0.20 |  | 0.06 | (-0.34, 0.46) | 0.20 |  | -0.25 | (-0.68, 0.17) | 0.22 |  |
| Abuse | (Ref: No) |  |  |  | 0.656 |  |  |  | 0.045 |  |  |  | 0.019 |
|  | Yes | -0.08 | (-0.43, 0.27) | 0.18 |  | -0.40 | (-0.78, -0.01) | 0.20 |  | -0.43 | (-0.78, -0.08) | 0.18 |  |
| Outsider growing up | (Ref: No) |  |  |  | 0.944 |  |  |  | 0.767 |  |  |  | 0.310 |
|  | Yes | 0.01 | (-0.38, 0.40) | 0.20 |  | 0.06 | (-0.32, 0.44) | 0.19 |  | 0.21 | (-0.19, 0.61) | 0.20 |  |
| Self-rated health growing up | (Ref: Good) |  |  |  | 0.590 |  |  |  | 0.517 |  |  |  | 0.263 |
|  | Excellent | 0.10 | (-0.21, 0.42) | 0.16 |  | -0.07 | (-0.34, 0.19) | 0.14 |  | 0.05 | (-0.26, 0.37) | 0.16 |  |
|  | Very good | -0.04 | (-0.35, 0.28) | 0.16 |  | -0.27 | (-0.60, 0.06) | 0.17 |  | -0.02 | (-0.34, 0.30) | 0.16 |  |
|  | Fair | -0.15 | (-0.62, 0.31) | 0.24 |  | -0.07 | (-0.50, 0.37) | 0.22 |  | -0.41 | (-0.87, 0.05) | 0.23 |  |
|  | Poor | -0.27 | (-0.93, 0.40) | 0.34 |  | -0.07 | (-0.77, 0.63) | 0.36 |  | -0.20 | (-0.94, 0.55) | 0.38 |  |
| Immigration status | (Ref: Born in this country) |  |  |  | 0.523 |  |  |  | 0.592 |  |  |  | 0.240 |
|  | Born in another country | -0.29 | (-1.65, 1.08) | 0.69 |  | -0.40 | (-1.88, 1.07) | 0.75 |  | -0.97 | (-2.58, 0.64) | 0.82 |  |
| Age 12 religious service attendance | (Ref: Never) |  |  |  | <.001 |  |  |  | 0.029 |  |  |  | 0.032 |
|  | At least 1/week | 0.47 | (0.25, 0.69) | 0.11 |  | 0.42 | (0.15, 0.70) | 0.14 |  | 0.39 | (0.13, 0.65) | 0.13 |  |
|  | 1-3/month | 0.20 | (-0.11, 0.52) | 0.16 |  | 0.11 | (-0.21, 0.44) | 0.16 |  | 0.16 | (-0.19, 0.51) | 0.18 |  |
|  | < 1/month | 0.05 | (-0.26, 0.36) | 0.16 |  | 0.21 | (-0.11, 0.53) | 0.16 |  | 0.08 | (-0.23, 0.39) | 0.16 |  |
| Year of birth | (Ref: 1998-2005; current age: 18-24) |  |  |  | <.001 |  |  |  | 0.114 |  |  |  | 0.021 |
|  | 1993-1998; age 25-29 | -0.30 | (-0.66, 0.06) | 0.19 |  | -0.09 | (-0.42, 0.24) | 0.17 |  | -0.03 | (-0.38, 0.32) | 0.18 |  |
|  | 1983-1993; age 30-39 | -0.65 | (-0.91, -0.38) | 0.14 |  | -0.24 | (-0.51, 0.03) | 0.14 |  | -0.40 | (-0.69, -0.10) | 0.15 |  |
|  | 1973-1983; age 40-49 | -0.62 | (-0.95, -0.29) | 0.17 |  | -0.23 | (-0.53, 0.07) | 0.15 |  | -0.07 | (-0.37, 0.23) | 0.15 |  |
|  | 1963-1973; age 50-59 | -0.21 | (-0.55, 0.13) | 0.18 |  | -0.20 | (-0.53, 0.13) | 0.17 |  | -0.04 | (-0.42, 0.34) | 0.19 |  |
|  | 1953-1963; age 60-69 | 0.03 | (-0.48, 0.54) | 0.26 |  | 0.04 | (-0.38, 0.46) | 0.21 |  | 0.03 | (-0.43, 0.49) | 0.23 |  |
|  | 1943-1953; age 70-79 | 0.24 | (-1.01, 1.50) | 0.64 |  | -0.64 | (-1.90, 0.63) | 0.65 |  | 0.61 | (-0.50, 1.73) | 0.57 |  |
|  | 1943 or earlier; age 80+ | -0.15 | (-3.06, 2.75) | 1.48 |  | 1.02 | (0.01, 2.03) | 0.52 |  | 0.87 | (-0.31, 2.04) | 0.60 |  |
| Gender | (Ref: Male) |  |  |  | <.001 |  |  |  | <.001 |  |  |  | <.001 |
|  | Female | 0.71 | (0.48, 0.94) | 0.12 |  | 0.55 | (0.32, 0.77) | 0.11 |  | 0.44 | (0.21, 0.67) | 0.12 |  |
| Religious affiliation | (Ref: Islam) |  |  |  | 0.234 |  |  |  | 0.130 |  |  |  | 0.827 |
|  | Collapsed affiliations with prevalence<3% | 0.34 | (-0.22, 0.90) | 0.29 |  | -0.64 | (-1.46, 0.18) | 0.42 |  | -0.05 | (-0.77, 0.67) | 0.37 |  |
| Race/ethnicity | (Ref: Plurality group) |  |  |  | 0.656 |  |  |  | 0.903 |  |  |  | 0.858 |
|  | Non-plurality groups | 0.16 | (-0.55, 0.88) | 0.37 |  | 0.07 | (-1.10, 1.24) | 0.60 |  | 0.10 | (-1.11, 1.31) | 0.62 |  |

Table S5d. Sensitivity to unmeasured confounding of childhood predictors in Egypt

|  | | Life Evaluation | | Life Satisfaction | | Happiness | |
| --- | --- | --- | --- | --- | --- | --- | --- |
| Variable | Category | E-value for Estimate | E-value for 95% CI | E-value for Estimate | E-value for 95% CI | E-value for Estimate | E-value for 95% CI |
| Relationship with mother | (Ref: Very bad/somewhat bad) |  |  |  |  |  |  |
|  | Very good/somewhat good | 1.61 | 1.00 | 1.18 | 1.00 | 1.84 | 1.00 |
| Relationship with father | (Ref: Very bad/somewhat bad) |  |  |  |  |  |  |
|  | Very good/somewhat good | 1.38 | 1.00 | 1.47 | 1.00 | 1.66 | 1.00 |
| Parent marital status | (Ref: Parents married) |  |  |  |  |  |  |
|  | Divorced | 1.41 | 1.00 | 1.17 | 1.00 | 1.37 | 1.00 |
|  | Parents were never married | 2.30 | 1.00 | 1.33 | 1.00 | 1.16 | 1.00 |
|  | One or both parents had died | 1.42 | 1.00 | 1.23 | 1.00 | 1.18 | 1.00 |
| Subjective financial status of family growing up | (Ref: Got by) |  |  |  |  |  |  |
|  | Lived comfortably | 1.28 | 1.00 | 1.12 | 1.00 | 1.37 | 1.06 |
|  | Found it difficult | 1.51 | 1.24 | 1.45 | 1.00 | 1.44 | 1.09 |
|  | Found it very difficult | 1.27 | 1.00 | 1.16 | 1.00 | 1.38 | 1.00 |
| Abuse | (Ref: No) |  |  |  |  |  |  |
|  | Yes | 1.19 | 1.00 | 1.53 | 1.06 | 1.54 | 1.18 |
| Outsider growing up | (Ref: No) |  |  |  |  |  |  |
|  | Yes | 1.07 | 1.00 | 1.15 | 1.00 | 1.33 | 1.00 |
| Self-rated health growing up | (Ref: Good) |  |  |  |  |  |  |
|  | Excellent | 1.22 | 1.00 | 1.18 | 1.00 | 1.15 | 1.00 |
|  | Very good | 1.12 | 1.00 | 1.41 | 1.00 | 1.09 | 1.00 |
|  | Fair | 1.28 | 1.00 | 1.17 | 1.00 | 1.53 | 1.00 |
|  | Poor | 1.40 | 1.00 | 1.17 | 1.00 | 1.32 | 1.00 |
| Immigration status | (Ref: Born in this country) |  |  |  |  |  |  |
|  | Born in another country | 1.42 | 1.00 | 1.54 | 1.00 | 2.04 | 1.00 |
| Age 12 religious service attendance | (Ref: Never) |  |  |  |  |  |  |
|  | At least 1/week | 1.59 | 1.38 | 1.55 | 1.27 | 1.51 | 1.25 |
|  | 1-3/month | 1.33 | 1.00 | 1.23 | 1.00 | 1.28 | 1.00 |
|  | < 1/month | 1.15 | 1.00 | 1.34 | 1.00 | 1.18 | 1.00 |
| Year of birth | (Ref: 1998-2005; current age: 18-24) |  |  |  |  |  |  |
|  | 1993-1998; age 25-29 | 1.43 | 1.00 | 1.20 | 1.00 | 1.10 | 1.00 |
|  | 1983-1993; age 30-39 | 1.76 | 1.51 | 1.37 | 1.00 | 1.52 | 1.22 |
|  | 1973-1983; age 40-49 | 1.73 | 1.43 | 1.36 | 1.00 | 1.17 | 1.00 |
|  | 1963-1973; age 50-59 | 1.34 | 1.00 | 1.33 | 1.00 | 1.13 | 1.00 |
|  | 1953-1963; age 60-69 | 1.11 | 1.00 | 1.13 | 1.00 | 1.11 | 1.00 |
|  | 1943-1953; age 70-79 | 1.37 | 1.00 | 1.75 | 1.00 | 1.71 | 1.00 |
|  | 1943 or earlier; age 80+ | 1.28 | 1.00 | 2.12 | 1.07 | 1.94 | 1.00 |
| Gender | (Ref: Male) |  |  |  |  |  |  |
|  | Female | 1.81 | 1.60 | 1.67 | 1.46 | 1.55 | 1.33 |
| Religious affiliation | (Ref: Islam) |  |  |  |  |  |  |
|  | Collapsed affiliations with prevalence<3% | 1.47 | 1.00 | 1.76 | 1.00 | 1.14 | 1.00 |
| Race/ethnicity | (Ref: Plurality group) |  |  |  |  |  |  |
|  | Non-plurality groups | 1.29 | 1.00 | 1.17 | 1.00 | 1.21 | 1.00 |

Table S5e. Complete-case supplemental analysis of means by demographic category for Egypt

|  | | Life Evaluation | | | | Life Satisfaction | | | | Happiness | | | |
| --- | --- | --- | --- | --- | --- | --- | --- | --- | --- | --- | --- | --- | --- |
| Variable | Category | Mean | 95% CI | SE | Global p-value | Mean | 95% CI | SE | Global p-value | Mean | 95% CI | SE | Global p-value |
| Age group | 18-24 | 5.76 | (5.55,5.97) | 0.11 | < .001 | 8.14 | (7.92,8.35) | 0.11 | 0.072 | 6.67 | (6.44,6.91) | 0.12 | 0.039 |
|  | 25-29 | 5.64 | (5.37,5.91) | 0.14 |  | 7.91 | (7.65,8.17) | 0.13 |  | 6.57 | (6.34,6.80) | 0.12 |  |
|  | 30-39 | 5.32 | (5.17,5.48) | 0.08 |  | 7.94 | (7.78,8.10) | 0.08 |  | 6.46 | (6.29,6.63) | 0.09 |  |
|  | 40-49 | 5.30 | (5.12,5.48) | 0.09 |  | 7.81 | (7.62,8.01) | 0.10 |  | 6.57 | (6.36,6.77) | 0.11 |  |
|  | 50-59 | 5.73 | (5.51,5.95) | 0.11 |  | 7.80 | (7.57,8.03) | 0.12 |  | 6.66 | (6.43,6.89) | 0.12 |  |
|  | 60-69 | 6.09 | (5.72,6.46) | 0.19 |  | 8.01 | (7.69,8.33) | 0.16 |  | 6.79 | (6.42,7.16) | 0.19 |  |
|  | 70-79 | 6.66 | (5.44,7.88) | 0.61 |  | 7.79 | (6.74,8.83) | 0.52 |  | 7.64 | (6.81,8.47) | 0.41 |  |
|  | 80 or older | 5.24 | (0.00,189811130036.61) | 1.53 |  | 8.89 | (0.00,50451306891.75) | 0.41 |  | 7.12 | (0.00,77406322003.55) | 0.63 |  |
| Gender | Female | 5.81 | (5.71,5.92) | 0.05 | < .001 | 8.09 | (7.97,8.21) | 0.06 | 0.001 | 6.73 | (6.62,6.85) | 0.06 | 0.002 |
|  | Male | 5.35 | (5.19,5.50) | 0.08 |  | 7.79 | (7.65,7.93) | 0.07 |  | 6.48 | (6.33,6.62) | 0.07 |  |
| Marital status | Divorced | 5.49 | (5.00,5.99) | 0.25 | 0.299 | 7.94 | (7.15,8.72) | 0.40 | 0.402 | 5.85 | (5.21,6.49) | 0.32 | 0.046 |
|  | Married | 5.54 | (5.43,5.65) | 0.06 |  | 7.91 | (7.80,8.02) | 0.06 |  | 6.65 | (6.53,6.77) | 0.06 |  |
|  | Separated | 5.01 | (4.02,6.01) | 0.49 |  | 8.13 | (6.99,9.28) | 0.56 |  | 5.65 | (4.59,6.70) | 0.52 |  |
|  | Single/Never been married | 5.75 | (5.54,5.97) | 0.11 |  | 7.95 | (7.76,8.14) | 0.10 |  | 6.55 | (6.34,6.77) | 0.11 |  |
|  | Widowed | 5.51 | (5.10,5.92) | 0.21 |  | 8.25 | (7.93,8.57) | 0.16 |  | 6.55 | (6.21,6.89) | 0.17 |  |
| Employment | Employed for an employer | 5.44 | (5.25,5.64) | 0.10 | 0.006 | 7.85 | (7.65,8.05) | 0.10 | 0.055 | 6.51 | (6.29,6.73) | 0.11 | 0.332 |
|  | Homemaker | 5.76 | (5.62,5.89) | 0.07 |  | 8.06 | (7.93,8.19) | 0.07 |  | 6.71 | (6.57,6.85) | 0.07 |  |
|  | None of these/Other | 5.69 | (4.16,7.21) | 0.70 |  | 8.75 | (7.59,9.91) | 0.53 |  | 6.95 | (5.63,8.27) | 0.60 |  |
|  | Retired | 5.78 | (5.27,6.28) | 0.26 |  | 7.69 | (7.24,8.14) | 0.23 |  | 6.75 | (6.31,7.19) | 0.22 |  |
|  | Self-employed | 5.29 | (5.07,5.51) | 0.11 |  | 7.97 | (7.75,8.18) | 0.11 |  | 6.49 | (6.28,6.70) | 0.11 |  |
|  | Student | 5.82 | (5.52,6.12) | 0.15 |  | 8.10 | (7.78,8.43) | 0.16 |  | 6.66 | (6.40,6.93) | 0.14 |  |
|  | Unemployed and looking for a job | 5.46 | (5.06,5.86) | 0.20 |  | 7.40 | (6.93,7.86) | 0.24 |  | 6.51 | (6.10,6.92) | 0.21 |  |
| Religious service attendance | A few times a year | 5.47 | (5.22,5.73) | 0.13 | 0.061 | 7.94 | (7.65,8.23) | 0.15 | 0.448 | 6.49 | (6.24,6.75) | 0.13 | 0.598 |
|  | More than once a week | 5.90 | (5.66,6.13) | 0.12 |  | 7.94 | (7.69,8.18) | 0.12 |  | 6.73 | (6.51,6.96) | 0.11 |  |
|  | Never | 5.57 | (5.44,5.71) | 0.07 |  | 8.01 | (7.89,8.13) | 0.06 |  | 6.62 | (6.47,6.76) | 0.07 |  |
|  | Once a week | 5.44 | (5.19,5.69) | 0.13 |  | 7.86 | (7.65,8.06) | 0.10 |  | 6.54 | (6.30,6.77) | 0.12 |  |
|  | One to three times a month | 5.39 | (5.07,5.70) | 0.16 |  | 7.76 | (7.39,8.13) | 0.19 |  | 6.55 | (6.20,6.91) | 0.18 |  |
| Education | Up to 8 years | 5.45 | (5.30,5.59) | 0.07 | < .001 | 7.80 | (7.65,7.95) | 0.08 | 0.003 | 6.56 | (6.40,6.72) | 0.08 | 0.021 |
|  | 16+ years | 5.99 | (5.82,6.16) | 0.09 |  | 8.04 | (7.82,8.27) | 0.11 |  | 6.89 | (6.67,7.11) | 0.11 |  |
|  | 9 to 15 years | 5.60 | (5.48,5.72) | 0.06 |  | 8.12 | (8.01,8.23) | 0.06 |  | 6.56 | (6.44,6.67) | 0.06 |  |
| Immigration status | Born in another country | 4.88 | (3.62,6.15) | 0.58 | 0.237 | 7.35 | (5.81,8.90) | 0.70 | 0.409 | 6.08 | (4.57,7.59) | 0.69 | 0.447 |
|  | Born in this country | 5.58 | (5.48,5.68) | 0.05 |  | 7.94 | (7.85,8.04) | 0.05 |  | 6.61 | (6.50,6.71) | 0.05 |  |
| Religious affiliation | Christianity | 6.03 | (5.41,6.65) | 0.31 | < .001 | 7.41 | (6.59,8.22) | 0.41 | < .001 | 6.65 | (6.00,7.30) | 0.33 | 0.893 |
|  | Islam | 5.57 | (5.47,5.67) | 0.05 |  | 7.96 | (7.86,8.05) | 0.05 |  | 6.60 | (6.50,6.71) | 0.05 |  |
|  | Taoism | 2.00 | (2.00,2.00) | 0.00 |  | 2.00 | (2.00,2.00) | 0.00 |  | 0.00 | (0.00,0.00) | 0.00 |  |

Table S5f. Complete-case supplemental analysis of childhood predictors regression analysis results for Egypt

|  | | Life Evaluation | | | | Life Satisfaction | | | | Happiness | | | |
| --- | --- | --- | --- | --- | --- | --- | --- | --- | --- | --- | --- | --- | --- |
| Variable | Category | Est | 95% CI | SE | Global p-value | Est | 95% CI | SE | Global p-value | Est | 95% CI | SE | Global p-value |
| Relationship with mother | (Ref: Very bad/somewhat bad) |  |  |  | 0.439 |  |  |  | 0.973 |  |  |  | 0.761 |
|  | Very good/somewhat good | 0.42 | (-0.63,1.47) | 0.54 |  | -0.02 | (-1.13,1.09) | 0.57 |  | 0.17 | (-0.93,1.27) | 0.56 |  |
| Relationship with father | (Ref: Very bad/somewhat bad) |  |  |  | 0.614 |  |  |  | 0.167 |  |  |  | 0.191 |
|  | Very good/somewhat good | -0.15 | (-0.75,0.44) | 0.30 |  | -0.45 | (-1.07,0.18) | 0.32 |  | -0.36 | (-0.90,0.17) | 0.27 |  |
| Parent marital status | (Ref: Parents married) |  |  |  | 0.394 |  |  |  | 0.908 |  |  |  | 0.822 |
|  | No, one or both of them had died | 0.18 | (-0.42,0.78) | 0.31 |  | 0.10 | (-0.51,0.72) | 0.31 |  | 0.00 | (-0.55,0.56) | 0.28 |  |
|  | No, they were never married | 1.06 | (-0.16,2.27) | 0.62 |  | -0.01 | (-1.11,1.09) | 0.56 |  | 0.09 | (-0.74,0.92) | 0.42 |  |
|  | Yes, married | 0.29 | (-0.30,0.88) | 0.30 |  | -0.03 | (-0.60,0.54) | 0.29 |  | 0.16 | (-0.38,0.70) | 0.28 |  |
| Subjective financial status of family growing up | (Ref: Got by) |  |  |  | 0.009 |  |  |  | 0.130 |  |  |  | 0.104 |
|  | Found it difficult | -0.27 | (-0.49,-0.05) | 0.11 |  | -0.25 | (-0.55,0.04) | 0.15 |  | -0.15 | (-0.43,0.13) | 0.14 |  |
|  | Found it very difficult | -0.27 | (-0.68,0.13) | 0.21 |  | -0.04 | (-0.43,0.35) | 0.20 |  | -0.32 | (-0.73,0.10) | 0.21 |  |
|  | Lived comfortably | 0.14 | (-0.06,0.34) | 0.10 |  | 0.10 | (-0.11,0.32) | 0.11 |  | 0.17 | (-0.05,0.40) | 0.11 |  |
| Abuse | (Ref: No) |  |  |  | 0.881 |  |  |  | 0.359 |  |  |  | 0.074 |
|  | Yes | -0.03 | (-0.35,0.30) | 0.17 |  | -0.16 | (-0.51,0.18) | 0.18 |  | -0.34 | (-0.71,0.03) | 0.19 |  |
| Outsider growing up | (Ref: No) |  |  |  | 0.954 |  |  |  | 0.928 |  |  |  | 0.298 |
|  | Yes | -0.01 | (-0.40,0.37) | 0.20 |  | 0.02 | (-0.36,0.40) | 0.19 |  | 0.20 | (-0.17,0.57) | 0.19 |  |
| Self-rated health growing up | (Ref: Good) |  |  |  | 0.687 |  |  |  | 0.527 |  |  |  | 0.156 |
|  | Excellent | 0.12 | (-0.14,0.39) | 0.14 |  | -0.08 | (-0.33,0.18) | 0.13 |  | 0.06 | (-0.21,0.34) | 0.14 |  |
|  | Fair | -0.03 | (-0.47,0.40) | 0.22 |  | -0.11 | (-0.51,0.29) | 0.20 |  | -0.43 | (-0.84,-0.02) | 0.21 |  |
|  | Poor | -0.12 | (-0.71,0.47) | 0.30 |  | -0.01 | (-0.66,0.63) | 0.33 |  | 0.04 | (-0.58,0.65) | 0.31 |  |
|  | Very good | 0.03 | (-0.25,0.31) | 0.14 |  | -0.25 | (-0.57,0.07) | 0.16 |  | 0.01 | (-0.29,0.31) | 0.15 |  |
| Immigration status | (Ref: Born in this country) |  |  |  | 0.192 |  |  |  | 0.390 |  |  |  | 0.425 |
|  | Born in another country | -0.76 | (-1.89,0.37) | 0.58 |  | -0.65 | (-2.12,0.82) | 0.75 |  | -0.57 | (-1.95,0.82) | 0.70 |  |
| Age 12 religious service attendance | (Ref: Never) |  |  |  | 0.002 |  |  |  | 0.039 |  |  |  | 0.168 |
|  | At least once a week | 0.40 | (0.20,0.61) | 0.10 |  | 0.39 | (0.13,0.65) | 0.13 |  | 0.25 | (0.03,0.47) | 0.11 |  |
|  | Less than once a month | -0.00 | (-0.28,0.28) | 0.14 |  | 0.22 | (-0.06,0.50) | 0.14 |  | 0.09 | (-0.16,0.34) | 0.13 |  |
|  | One to three times a month | 0.20 | (-0.08,0.49) | 0.14 |  | 0.22 | (-0.08,0.53) | 0.16 |  | 0.07 | (-0.22,0.36) | 0.15 |  |
| Year of birth | (Ref: 1998-2005; current age: 18-24) |  |  |  | <.001 |  |  |  | 0.129 |  |  |  | 0.056 |
|  | 1993-1998; age 25-29 | -0.12 | (-0.45,0.21) | 0.17 |  | -0.22 | (-0.55,0.12) | 0.17 |  | -0.10 | (-0.43,0.23) | 0.17 |  |
|  | 1983-1993; age 30-39 | -0.41 | (-0.65,-0.16) | 0.13 |  | -0.18 | (-0.43,0.08) | 0.13 |  | -0.20 | (-0.48,0.07) | 0.14 |  |
|  | 1973-1983; age 40-49 | -0.41 | (-0.71,-0.12) | 0.15 |  | -0.28 | (-0.56,0.00) | 0.14 |  | -0.08 | (-0.37,0.21) | 0.15 |  |
|  | 1963-1973; age 50-59 | 0.07 | (-0.22,0.36) | 0.15 |  | -0.27 | (-0.57,0.03) | 0.15 |  | 0.02 | (-0.29,0.33) | 0.16 |  |
|  | 1953-1963; age 60-69 | 0.44 | (-0.00,0.88) | 0.23 |  | -0.05 | (-0.42,0.32) | 0.19 |  | 0.16 | (-0.25,0.57) | 0.21 |  |
|  | 1943-1953; age 70-79 | 0.89 | (-0.41,2.19) | 0.66 |  | -0.28 | (-1.26,0.69) | 0.50 |  | 0.91 | (0.02,1.79) | 0.45 |  |
|  | 1943 or earlier; age 80+ | -0.35 | (-3.19,2.49) | 1.45 |  | 0.83 | (-0.12,1.79) | 0.49 |  | 0.56 | (-0.60,1.73) | 0.60 |  |
| Gender | (Ref: Male) |  |  |  | <.001 |  |  |  | <.001 |  |  |  | <.001 |
|  | Male | -0.66 | (-0.85,-0.46) | 0.10 |  | -0.43 | (-0.63,-0.23) | 0.10 |  | -0.34 | (-0.53,-0.15) | 0.10 |  |
| Religious affiliation | (Ref: Islam) |  |  |  | 0.273 |  |  |  | 0.133 |  |  |  | 0.961 |
|  | Collapsed affiliations with prevalence<3% | 0.34 | (-0.27,0.95) | 0.31 |  | -0.62 | (-1.41,0.18) | 0.41 |  | -0.02 | (-0.62,0.59) | 0.31 |  |
| Race/ethnicity | (Ref: Plurality group) |  |  |  | 0.630 |  |  |  | 0.679 |  |  |  | 0.937 |
|  | Non-plurality groups | -0.20 | (-1.00,0.60) | 0.41 |  | 0.19 | (-0.69,1.06) | 0.45 |  | 0.04 | (-1.01,1.09) | 0.53 |  |

Table S5g. Complete-case supplemental analysis of sensitivity to unmeasured confounding of childhood predictors in Egypt

|  | | Life Evaluation | | Life Satisfaction | | Happiness | |
| --- | --- | --- | --- | --- | --- | --- | --- |
| Variable | Category | E-value for Estimate | E-value for 95% CI | E-value for Estimate | E-value for 95% CI | E-value for Estimate | E-value for 95% CI |
| Relationship with mother | (Ref: Very bad/somewhat bad) |  |  |  |  |  |  |
|  | Very good/somewhat good | 1.61 | 1.00 | 1.09 | 1.00 | 1.32 | 1.00 |
| Relationship with father | (Ref: Very bad/somewhat bad) |  |  |  |  |  |  |
|  | Very good/somewhat good | 1.31 | 1.00 | 1.63 | 1.00 | 1.53 | 1.00 |
| Parent marital status | (Ref: Parents married) |  |  |  |  |  |  |
|  | No, one or both of them had died | 1.34 | 1.00 | 1.24 | 1.00 | 1.02 | 1.00 |
|  | No, they were never married | 2.31 | 1.00 | 1.07 | 1.00 | 1.21 | 1.00 |
|  | Yes, married | 1.46 | 1.00 | 1.12 | 1.00 | 1.31 | 1.00 |
| Subjective financial status of family growing up | (Ref: Got by) |  |  |  |  |  |  |
|  | Found it difficult | 1.45 | 1.16 | 1.42 | 1.00 | 1.30 | 1.00 |
|  | Found it very difficult | 1.45 | 1.00 | 1.13 | 1.00 | 1.49 | 1.00 |
|  | Lived comfortably | 1.29 | 1.00 | 1.24 | 1.00 | 1.33 | 1.00 |
| Abuse | (Ref: No) |  |  |  |  |  |  |
|  | Yes | 1.11 | 1.00 | 1.31 | 1.00 | 1.51 | 1.00 |
| Outsider growing up | (Ref: No) |  |  |  |  |  |  |
|  | Yes | 1.07 | 1.00 | 1.09 | 1.00 | 1.36 | 1.00 |
| Self-rated health growing up | (Ref: Good) |  |  |  |  |  |  |
|  | Excellent | 1.27 | 1.00 | 1.20 | 1.00 | 1.18 | 1.00 |
|  | Fair | 1.12 | 1.00 | 1.25 | 1.00 | 1.61 | 1.09 |
|  | Poor | 1.26 | 1.00 | 1.07 | 1.00 | 1.13 | 1.00 |
|  | Very good | 1.12 | 1.00 | 1.42 | 1.00 | 1.06 | 1.00 |
| Immigration status | (Ref: Born in this country) |  |  |  |  |  |  |
|  | Born in another country | 1.98 | 1.00 | 1.85 | 1.00 | 1.75 | 1.00 |
| Age 12 religious service attendance | (Ref: Never) |  |  |  |  |  |  |
|  | At least once a week | 1.59 | 1.37 | 1.57 | 1.28 | 1.41 | 1.11 |
|  | Less than once a month | 1.04 | 1.00 | 1.38 | 1.00 | 1.22 | 1.00 |
|  | One to three times a month | 1.37 | 1.00 | 1.39 | 1.00 | 1.18 | 1.00 |
| Year of birth | (Ref: 1998-2005; current age: 18-24) |  |  |  |  |  |  |
|  | 1993-1998; age 25-29 | 1.27 | 1.00 | 1.38 | 1.00 | 1.23 | 1.00 |
|  | 1983-1993; age 30-39 | 1.60 | 1.32 | 1.33 | 1.00 | 1.36 | 1.00 |
|  | 1973-1983; age 40-49 | 1.60 | 1.26 | 1.45 | 1.00 | 1.20 | 1.00 |
|  | 1963-1973; age 50-59 | 1.19 | 1.00 | 1.44 | 1.00 | 1.10 | 1.00 |
|  | 1953-1963; age 60-69 | 1.63 | 1.00 | 1.15 | 1.00 | 1.31 | 1.00 |
|  | 1943-1953; age 70-79 | 2.12 | 1.00 | 1.46 | 1.00 | 2.11 | 1.10 |
|  | 1943 or earlier; age 80+ | 1.54 | 1.00 | 2.05 | 1.00 | 1.75 | 1.00 |
| Gender | (Ref: Male) |  |  |  |  |  |  |
|  | Male | 1.87 | 1.66 | 1.61 | 1.39 | 1.51 | 1.30 |
| Religious affiliation | (Ref: Islam) |  |  |  |  |  |  |
|  | Collapsed affiliations with prevalence<3% | 1.53 | 1.00 | 1.81 | 1.00 | 1.08 | 1.00 |
| Race/ethnicity | (Ref: Plurality group) |  |  |  |  |  |  |
|  | Non-plurality groups | 1.36 | 1.00 | 1.34 | 1.00 | 1.14 | 1.00 |

# Tables S6a-g: Germany

Table S6a. Nationally representative descriptive statistics for Germany

| **Characteristic** | **N = 9,506**1 |
| --- | --- |
| **Age group** |  |
| 1998-2005; age 18-24 | 829 (8.7%) |
| 1993-1998; age 25-29 | 774 (8.1%) |
| 1983-1993; age 30-39 | 1,438 (15%) |
| 1973-1983; age 40-49 | 1,494 (16%) |
| 1963-1973; age 50-59 | 1,729 (18%) |
| 1953-1963; age 60-69 | 1,915 (20%) |
| 1943-1953; age 70-79 | 1,137 (12%) |
| 1943 or earlier; age 80+ | 190 (2.0%) |
| (Missing) | 0 (0%) |
| **Gender** |  |
| Male | 4,641 (49%) |
| Female | 4,843 (51%) |
| Other | 11 (0.1%) |
| (Missing) | 11 (0.1%) |
| **Respondent Marital status** |  |
| Married | 4,784 (50%) |
| Separated | 219 (2.3%) |
| Divorced | 767 (8.1%) |
| Widowed | 409 (4.3%) |
| Single, never married | 2,627 (28%) |
| Domestic Partner | 619 (6.5%) |
| (Missing) | 81 (0.9%) |
| **Employment** |  |
| Employed for an employer | 4,950 (52%) |
| Self-employed | 712 (7.5%) |
| Retired | 2,480 (26%) |
| Student | 605 (6.4%) |
| Homemaker | 251 (2.6%) |
| Unemployed and looking for a job | 288 (3.0%) |
| None of these/Other | 204 (2.1%) |
| (Missing) | 14 (0.2%) |
| **Religious service attendance as an adult (now)** |  |
| More than 1/week | 285 (3.0%) |
| 1/week | 424 (4.5%) |
| 1-3/month | 550 (5.8%) |
| A few times a year | 2,362 (25%) |
| Never | 5,876 (62%) |
| (Missing) | 9 (<0.1%) |
| **Education (years)** |  |
| Up to 8 years | 235 (2.5%) |
| 9-15 years | 6,094 (64%) |
| 16+ years | 3,164 (33%) |
| (Missing) | 13 (0.1%) |
| **Immigration status** |  |
| Born in this country | 8,722 (92%) |
| Born in another country | 744 (7.8%) |
| (Missing) | 40 (0.4%) |
| **Religious affiliation as an adult (now)** |  |
| Christianity | 5,052 (53%) |
| Islam | 351 (3.7%) |
| Hinduism | 12 (0.1%) |
| Buddhism | 51 (0.5%) |
| Judaism | 19 (0.2%) |
| Sikhism | 5 (<0.1%) |
| Baha'i | 3 (<0.1%) |
| Jainism | 0 (0%) |
| Shinto | 2 (<0.1%) |
| Taoism | 0 (<0.1%) |
| Confucianism | 4 (<0.1%) |
| Primal, Animist, or Folk religion | 34 (0.4%) |
| Spiritism | 0 (0%) |
| Umbanda, Candomble, and other African-derived religions | 0 (0%) |
| Chinese folk/traditional religion | 0 (0%) |
| Some other religion | 60 (0.6%) |
| No religion/Atheist/Agnostic | 3,815 (40%) |
| (Missing) | 99 (1.0%) |
| **Relationship with mother growing up** |  |
| Very good | 5,497 (58%) |
| Somewhat good | 3,031 (32%) |
| Somewhat bad | 496 (5.2%) |
| Very bad | 187 (2.0%) |
| Does not apply | 241 (2.5%) |
| (Missing) | 54 (0.6%) |
| **Relationship with father growing up** |  |
| Very good | 4,652 (49%) |
| Somewhat good | 3,012 (32%) |
| Somewhat bad | 846 (8.9%) |
| Very bad | 385 (4.0%) |
| Does not apply | 538 (5.7%) |
| (Missing) | 73 (0.8%) |
| **Parent marital status at age 12** |  |
| Parents married | 7,620 (80%) |
| Divorced | 927 (9.8%) |
| Parents were never married | 578 (6.1%) |
| One or both parents had died | 245 (2.6%) |
| (Missing) | 136 (1.4%) |
| **Subjective financial status of family growing up** |  |
| Lived comfortably | 3,177 (33%) |
| Got by | 4,508 (47%) |
| Found it difficult | 1,481 (16%) |
| Found it very difficult | 314 (3.3%) |
| (Missing) | 26 (0.3%) |
| **Abuse** |  |
| Yes | 1,086 (11%) |
| No | 8,321 (88%) |
| (Missing) | 99 (1.0%) |
| **Outsider growing up** |  |
| Yes | 1,105 (12%) |
| No | 8,262 (87%) |
| (Missing) | 139 (1.5%) |
| **Self-rated health growing up** |  |
| Excellent | 2,633 (28%) |
| Very good | 3,518 (37%) |
| Good | 2,582 (27%) |
| Fair | 612 (6.4%) |
| Poor | 134 (1.4%) |
| (Missing) | 26 (0.3%) |
| **Age 12 religious service attendance** |  |
| At least 1/week | 1,943 (20%) |
| 1-3/month | 1,899 (20%) |
| <1/month | 2,887 (30%) |
| Never | 2,749 (29%) |
| (Missing) | 27 (0.3%) |
| **Religious affiliation at age 12** |  |
| Christianity | 5,751 (61%) |
| Islam | 350 (3.7%) |
| Hinduism | 15 (0.2%) |
| Buddhism | 25 (0.3%) |
| Judaism | 18 (0.2%) |
| Sikhism | 5 (<0.1%) |
| Baha'i | 2 (<0.1%) |
| Jainism | 1 (<0.1%) |
| Shinto | 0 (0%) |
| Taoism | 0 (0%) |
| Confucianism | 4 (<0.1%) |
| Primal, Animist, or Folk religion | 19 (0.2%) |
| Spiritism | 0 (0%) |
| Umbanda, Candomble, and other African-derived religions | 0 (0%) |
| Chinese folk/traditional religion | 0 (0%) |
| Some other religion | 67 (0.7%) |
| No religion/Atheist/Agnostic | 3,163 (33%) |
| (Missing) | 85 (0.9%) |
| 1n (%) | |

Table S6b. Means by demographic category for Germany

|  | | Life Evaluation | | | | Life Satisfaction | | | | Happiness | | | |
| --- | --- | --- | --- | --- | --- | --- | --- | --- | --- | --- | --- | --- | --- |
| Variable | Category | Mean | 95% CI | SE | Global p-value | Mean | 95% CI | SE | Global p-value | Mean | 95% CI | SE | Global p-value |
| Age group | 18-24 | 6.56 | (6.39,6.72) | 0.08 | 0.001 | 6.54 | (6.34,6.74) | 0.10 | < .001 | 6.59 | (6.40,6.78) | 0.10 | < .001 |
|  | 25-29 | 6.79 | (6.66,6.93) | 0.07 |  | 6.80 | (6.63,6.98) | 0.09 |  | 6.83 | (6.66,6.99) | 0.08 |  |
|  | 30-39 | 6.85 | (6.75,6.95) | 0.05 |  | 6.93 | (6.81,7.05) | 0.06 |  | 6.93 | (6.82,7.05) | 0.06 |  |
|  | 40-49 | 6.68 | (6.57,6.80) | 0.06 |  | 6.79 | (6.65,6.92) | 0.07 |  | 6.74 | (6.62,6.86) | 0.06 |  |
|  | 50-59 | 6.64 | (6.52,6.75) | 0.06 |  | 6.86 | (6.74,6.99) | 0.06 |  | 6.87 | (6.76,6.99) | 0.06 |  |
|  | 60-69 | 6.76 | (6.66,6.87) | 0.05 |  | 7.07 | (6.95,7.19) | 0.06 |  | 7.01 | (6.90,7.11) | 0.05 |  |
|  | 70-79 | 6.79 | (6.64,6.95) | 0.08 |  | 7.23 | (7.07,7.39) | 0.08 |  | 7.11 | (6.95,7.26) | 0.08 |  |
|  | 80 or older | 7.22 | (6.92,7.53) | 0.15 |  | 7.69 | (7.34,8.04) | 0.18 |  | 7.59 | (7.33,7.84) | 0.13 |  |
| Gender | Male | 6.77 | (6.70,6.83) | 0.03 | 0.038 | 6.98 | (6.90,7.05) | 0.04 | 0.028 | 6.93 | (6.86,6.99) | 0.04 | 0.022 |
|  | Female | 6.71 | (6.65,6.78) | 0.03 |  | 6.89 | (6.81,6.96) | 0.04 |  | 6.88 | (6.81,6.95) | 0.04 |  |
|  | Other | 5.53 | (4.19,6.87) | 0.54 |  | 5.95 | (4.79,7.11) | 0.47 |  | 5.39 | (3.95,6.82) | 0.58 |  |
| Marital status | Married | 6.98 | (6.91,7.04) | 0.03 | < .001 | 7.25 | (7.18,7.32) | 0.04 | < .001 | 7.20 | (7.13,7.26) | 0.03 | < .001 |
|  | Separated | 6.51 | (6.27,6.75) | 0.12 |  | 6.54 | (6.22,6.86) | 0.16 |  | 6.56 | (6.27,6.85) | 0.15 |  |
|  | Divorced | 6.20 | (6.01,6.39) | 0.10 |  | 6.54 | (6.34,6.75) | 0.10 |  | 6.51 | (6.31,6.71) | 0.10 |  |
|  | Widowed | 6.85 | (6.63,7.06) | 0.11 |  | 6.97 | (6.72,7.22) | 0.13 |  | 6.96 | (6.75,7.17) | 0.11 |  |
|  | Never | 6.45 | (6.36,6.54) | 0.04 |  | 6.48 | (6.37,6.58) | 0.05 |  | 6.49 | (6.39,6.59) | 0.05 |  |
|  | Domestic Partner | 6.81 | (6.65,6.97) | 0.08 |  | 6.98 | (6.80,7.16) | 0.09 |  | 6.95 | (6.78,7.11) | 0.08 |  |
| Employment | Employed for an employer | 6.84 | (6.78,6.90) | 0.03 | < .001 | 7.01 | (6.94,7.08) | 0.04 | < .001 | 6.97 | (6.91,7.04) | 0.03 | < .001 |
|  | Self-employed | 6.96 | (6.81,7.10) | 0.07 |  | 7.10 | (6.92,7.28) | 0.09 |  | 7.09 | (6.92,7.25) | 0.08 |  |
|  | Retired | 6.71 | (6.61,6.81) | 0.05 |  | 7.06 | (6.95,7.16) | 0.06 |  | 6.98 | (6.88,7.08) | 0.05 |  |
|  | Student | 6.73 | (6.55,6.91) | 0.09 |  | 6.69 | (6.47,6.92) | 0.11 |  | 6.68 | (6.48,6.89) | 0.10 |  |
|  | Homemaker | 6.14 | (5.81,6.46) | 0.17 |  | 6.46 | (6.11,6.81) | 0.18 |  | 6.46 | (6.10,6.81) | 0.18 |  |
|  | Unemployed and looking for a job | 5.46 | (5.14,5.77) | 0.16 |  | 5.43 | (5.09,5.77) | 0.17 |  | 5.81 | (5.48,6.14) | 0.17 |  |
|  | None of these/Other | 6.38 | (5.99,6.77) | 0.20 |  | 6.15 | (5.73,6.58) | 0.22 |  | 6.29 | (5.88,6.69) | 0.21 |  |
| Religious service attendance | More than 1/week | 7.16 | (6.91,7.41) | 0.13 | < .001 | 7.47 | (7.17,7.76) | 0.15 | < .001 | 7.43 | (7.14,7.72) | 0.15 | < .001 |
|  | 1/week | 7.18 | (6.98,7.39) | 0.11 |  | 7.29 | (7.05,7.54) | 0.13 |  | 7.28 | (7.06,7.49) | 0.11 |  |
|  | 1-3/month | 7.01 | (6.83,7.19) | 0.09 |  | 7.27 | (7.06,7.47) | 0.10 |  | 7.15 | (6.96,7.34) | 0.10 |  |
|  | A few times a year | 7.00 | (6.91,7.09) | 0.04 |  | 7.21 | (7.11,7.31) | 0.05 |  | 7.12 | (7.03,7.21) | 0.05 |  |
|  | Never | 6.56 | (6.50,6.62) | 0.03 |  | 6.73 | (6.66,6.80) | 0.04 |  | 6.74 | (6.68,6.80) | 0.03 |  |
| Education | Up to 8 years | 6.18 | (5.83,6.54) | 0.18 | < .001 | 6.34 | (5.97,6.71) | 0.19 | < .001 | 6.34 | (6.00,6.69) | 0.17 | < .001 |
|  | 9-15 years | 6.55 | (6.49,6.61) | 0.03 |  | 6.78 | (6.71,6.84) | 0.03 |  | 6.77 | (6.71,6.83) | 0.03 |  |
|  | 16+ years | 7.14 | (7.07,7.21) | 0.04 |  | 7.27 | (7.18,7.35) | 0.04 |  | 7.20 | (7.12,7.28) | 0.04 |  |
| Immigration status | Born in this country | 6.75 | (6.70,6.80) | 0.02 | 0.134 | 6.95 | (6.89,7.00) | 0.03 | 0.032 | 6.90 | (6.85,6.96) | 0.03 | 0.712 |
|  | Born in another country | 6.61 | (6.44,6.79) | 0.09 |  | 6.72 | (6.53,6.92) | 0.10 |  | 6.87 | (6.69,7.05) | 0.09 |  |
| Religious affiliation | Christianity | 6.82 | (6.75,6.88) | 0.03 | < .001 | 7.05 | (6.98,7.12) | 0.03 | < .001 | 7.00 | (6.94,7.06) | 0.03 | < .001 |
|  | Islam | 6.55 | (6.29,6.81) | 0.13 |  | 6.63 | (6.31,6.95) | 0.16 |  | 6.63 | (6.32,6.94) | 0.16 |  |
|  | Hinduism | 6.07 | * | * |  | 6.84 | * | * |  | 6.67 | * | * |  |
|  | Buddhism | 6.57 | (5.99,7.14) | 0.28 |  | 7.20 | (6.68,7.73) | 0.26 |  | 7.34 | (6.84,7.84) | 0.25 |  |
|  | Judaism | 6.65 | (5.52,7.78) | 0.44 |  | 7.09 | (5.96,8.22) | 0.42 |  | 7.56 | (6.30,8.82) | 0.47 |  |
|  | Sikhism | 8.30 | * | * |  | 8.21 | * | * |  | 8.28 | * | * |  |
|  | Baha'i | 8.71 | * | * |  | 8.71 | * | * |  | 8.71 | * | * |  |
|  | Shinto | 6.00 | * | * |  | 5.00 | * | * |  | 4.00 | * | * |  |
|  | Taoism | 8.00 | * | * |  | 9.00 | * | * |  | 8.61 | * | * |  |
|  | Confucianism | 7.39 | * | * |  | 8.46 | * | * |  | 8.00 | * | * |  |
|  | Primal, Animist, or Folk religion | 5.95 | (5.06,6.83) | 0.42 |  | 5.54 | (4.26,6.82) | 0.61 |  | 6.27 | (5.22,7.33) | 0.50 |  |
|  | Some other religion | 5.53 | (4.32,6.73) | 0.60 |  | 5.75 | (4.50,7.00) | 0.62 |  | 5.87 | (4.59,7.15) | 0.64 |  |
|  | No religion/Atheist/Agnostic | 6.68 | (6.61,6.75) | 0.04 |  | 6.82 | (6.74,6.91) | 0.04 |  | 6.81 | (6.73,6.88) | 0.04 |  |

Table S6c. Childhood predictors regression analysis results for Germany

|  | | Life Evaluation | | | | Life Satisfaction | | | | Happiness | | | |
| --- | --- | --- | --- | --- | --- | --- | --- | --- | --- | --- | --- | --- | --- |
| Variable | Category | Est | 95% CI | SE | Global p-value | Est | 95% CI | SE | Global p-value | Est | 95% CI | SE | Global p-value |
| Relationship with mother | (Ref: Very bad/somewhat bad) |  |  |  | 0.375 |  |  |  | 0.014 |  |  |  | 0.029 |
|  | Very good/somewhat good | 0.09 | (-0.11, 0.30) | 0.10 |  | 0.27 | (0.05, 0.49) | 0.11 |  | 0.23 | (0.02, 0.44) | 0.11 |  |
| Relationship with father | (Ref: Very bad/somewhat bad) |  |  |  | 0.368 |  |  |  | 0.596 |  |  |  | 0.494 |
|  | Very good/somewhat good | 0.07 | (-0.09, 0.23) | 0.08 |  | 0.05 | (-0.13, 0.23) | 0.09 |  | -0.06 | (-0.22, 0.11) | 0.08 |  |
| Parent marital status | (Ref: Parents married) |  |  |  | 0.018 |  |  |  | 0.027 |  |  |  | 0.015 |
|  | Divorced | -0.13 | (-0.28, 0.03) | 0.08 |  | -0.19 | (-0.37, -0.01) | 0.09 |  | -0.17 | (-0.34, 0.00) | 0.09 |  |
|  | Parents were never married | -0.31 | (-0.53, -0.09) | 0.11 |  | -0.28 | (-0.52, -0.05) | 0.12 |  | -0.28 | (-0.51, -0.06) | 0.12 |  |
|  | One or both parents had died | -0.12 | (-0.41, 0.16) | 0.14 |  | -0.11 | (-0.43, 0.20) | 0.16 |  | -0.21 | (-0.50, 0.08) | 0.15 |  |
| Subjective financial status of family growing up | (Ref: Got by) |  |  |  | <.001 |  |  |  | <.001 |  |  |  | 0.004 |
|  | Lived comfortably | 0.24 | (0.13, 0.35) | 0.06 |  | 0.22 | (0.09, 0.34) | 0.06 |  | 0.15 | (0.03, 0.27) | 0.06 |  |
|  | Found it difficult | -0.16 | (-0.30, -0.01) | 0.07 |  | -0.15 | (-0.32, 0.02) | 0.09 |  | -0.10 | (-0.25, 0.05) | 0.08 |  |
|  | Found it very difficult | -0.38 | (-0.71, -0.05) | 0.17 |  | -0.33 | (-0.68, 0.01) | 0.18 |  | -0.31 | (-0.62, 0.01) | 0.16 |  |
| Abuse | (Ref: No) |  |  |  | <.001 |  |  |  | <.001 |  |  |  | <.001 |
|  | Yes | -0.30 | (-0.46, -0.15) | 0.08 |  | -0.34 | (-0.52, -0.17) | 0.09 |  | -0.28 | (-0.45, -0.12) | 0.08 |  |
| Outsider growing up | (Ref: No) |  |  |  | <.001 |  |  |  | <.001 |  |  |  | <.001 |
|  | Yes | -0.45 | (-0.60, -0.30) | 0.08 |  | -0.48 | (-0.64, -0.32) | 0.08 |  | -0.47 | (-0.63, -0.31) | 0.08 |  |
| Self-rated health growing up | (Ref: Good) |  |  |  | <.001 |  |  |  | <.001 |  |  |  | <.001 |
|  | Excellent | 0.40 | (0.26, 0.54) | 0.07 |  | 0.60 | (0.44, 0.76) | 0.08 |  | 0.68 | (0.53, 0.82) | 0.07 |  |
|  | Very good | 0.17 | (0.05, 0.29) | 0.06 |  | 0.32 | (0.19, 0.45) | 0.07 |  | 0.35 | (0.23, 0.48) | 0.06 |  |
|  | Fair | -0.30 | (-0.52, -0.08) | 0.11 |  | -0.44 | (-0.69, -0.20) | 0.13 |  | -0.35 | (-0.58, -0.12) | 0.12 |  |
|  | Poor | 0.45 | (-0.08, 0.97) | 0.27 |  | 0.43 | (-0.07, 0.93) | 0.26 |  | 0.37 | (-0.15, 0.88) | 0.26 |  |
| Immigration status | (Ref: Born in this country) |  |  |  | 0.102 |  |  |  | 0.147 |  |  |  | 0.006 |
|  | Born in another country | 0.16 | (-0.03, 0.35) | 0.10 |  | 0.16 | (-0.06, 0.37) | 0.11 |  | 0.27 | (0.08, 0.47) | 0.10 |  |
| Age 12 religious service attendance | (Ref: Never) |  |  |  | <.001 |  |  |  | <.001 |  |  |  | <.001 |
|  | At least 1/week | 0.41 | (0.27, 0.55) | 0.07 |  | 0.47 | (0.30, 0.63) | 0.08 |  | 0.39 | (0.24, 0.54) | 0.08 |  |
|  | 1-3/month | 0.33 | (0.20, 0.47) | 0.07 |  | 0.30 | (0.14, 0.46) | 0.08 |  | 0.24 | (0.09, 0.38) | 0.07 |  |
|  | < 1/month | 0.27 | (0.15, 0.39) | 0.06 |  | 0.27 | (0.12, 0.41) | 0.07 |  | 0.20 | (0.07, 0.32) | 0.07 |  |
| Year of birth | (Ref: 1998-2005; current age: 18-24) |  |  |  | <.001 |  |  |  | <.001 |  |  |  | <.001 |
|  | 1993-1998; age 25-29 | 0.22 | (0.01, 0.43) | 0.11 |  | 0.24 | (-0.02, 0.50) | 0.13 |  | 0.21 | (-0.03, 0.45) | 0.12 |  |
|  | 1983-1993; age 30-39 | 0.25 | (0.06, 0.44) | 0.10 |  | 0.33 | (0.10, 0.55) | 0.11 |  | 0.28 | (0.07, 0.49) | 0.11 |  |
|  | 1973-1983; age 40-49 | 0.11 | (-0.09, 0.31) | 0.10 |  | 0.22 | (-0.01, 0.46) | 0.12 |  | 0.12 | (-0.09, 0.34) | 0.11 |  |
|  | 1963-1973; age 50-59 | 0.07 | (-0.13, 0.27) | 0.10 |  | 0.31 | (0.08, 0.54) | 0.12 |  | 0.27 | (0.06, 0.48) | 0.11 |  |
|  | 1953-1963; age 60-69 | 0.24 | (0.04, 0.44) | 0.10 |  | 0.57 | (0.34, 0.80) | 0.12 |  | 0.45 | (0.24, 0.66) | 0.11 |  |
|  | 1943-1953; age 70-79 | 0.24 | (0.01, 0.47) | 0.12 |  | 0.69 | (0.44, 0.94) | 0.13 |  | 0.53 | (0.30, 0.77) | 0.12 |  |
|  | 1943 or earlier; age 80+ | 0.71 | (0.37, 1.05) | 0.17 |  | 1.16 | (0.76, 1.56) | 0.20 |  | 1.04 | (0.72, 1.36) | 0.16 |  |
| Gender | (Ref: Male) |  |  |  | 0.762 |  |  |  | 0.834 |  |  |  | 0.545 |
|  | Female | -0.01 | (-0.10, 0.08) | 0.05 |  | -0.03 | (-0.13, 0.08) | 0.05 |  | 0.01 | (-0.09, 0.11) | 0.05 |  |
|  | Other | -0.38 | (-1.46, 0.70) | 0.55 |  | 0.15 | (-0.83, 1.12) | 0.50 |  | -0.52 | (-1.48, 0.45) | 0.49 |  |
| Religious affiliation | (Ref: No religion/Atheist/Agnostic) |  |  |  | 0.038 |  |  |  | 0.085 |  |  |  | 0.267 |
|  | Islam | -0.36 | (-0.64, -0.08) | 0.14 |  | -0.38 | (-0.73, -0.03) | 0.18 |  | -0.32 | (-0.64, 0.00) | 0.16 |  |
|  | Christianity | -0.08 | (-0.18, 0.03) | 0.05 |  | 0.02 | (-0.11, 0.14) | 0.06 |  | -0.02 | (-0.13, 0.09) | 0.06 |  |
|  | Collapsed affiliations with prevalence<3% | -0.45 | (-1.03, 0.13) | 0.30 |  | -0.34 | (-0.93, 0.26) | 0.30 |  | -0.12 | (-0.73, 0.49) | 0.31 |  |
| Race/ethnicity | (Ref: Plurality group) |  |  |  |  |  |  |  |  |  |  |  |  |

Table S6d. Sensitivity to unmeasured confounding of childhood predictors in Germany

|  | | Life Evaluation | | Life Satisfaction | | Happiness | |
| --- | --- | --- | --- | --- | --- | --- | --- |
| Variable | Category | E-value for Estimate | E-value for 95% CI | E-value for Estimate | E-value for 95% CI | E-value for Estimate | E-value for 95% CI |
| Relationship with mother | (Ref: Very bad/somewhat bad) |  |  |  |  |  |  |
|  | Very good/somewhat good | 1.27 | 1.00 | 1.50 | 1.17 | 1.48 | 1.11 |
| Relationship with father | (Ref: Very bad/somewhat bad) |  |  |  |  |  |  |
|  | Very good/somewhat good | 1.23 | 1.00 | 1.16 | 1.00 | 1.19 | 1.00 |
| Parent marital status | (Ref: Parents married) |  |  |  |  |  |  |
|  | Divorced | 1.33 | 1.00 | 1.40 | 1.07 | 1.38 | 1.00 |
|  | Parents were never married | 1.61 | 1.27 | 1.52 | 1.17 | 1.55 | 1.20 |
|  | One or both parents had died | 1.32 | 1.00 | 1.28 | 1.00 | 1.45 | 1.00 |
| Subjective financial status of family growing up | (Ref: Got by) |  |  |  |  |  |  |
|  | Lived comfortably | 1.51 | 1.33 | 1.43 | 1.25 | 1.36 | 1.15 |
|  | Found it difficult | 1.38 | 1.08 | 1.34 | 1.00 | 1.27 | 1.00 |
|  | Found it very difficult | 1.72 | 1.19 | 1.58 | 1.00 | 1.58 | 1.00 |
| Abuse | (Ref: No) |  |  |  |  |  |  |
|  | Yes | 1.60 | 1.37 | 1.60 | 1.37 | 1.55 | 1.31 |
| Outsider growing up | (Ref: No) |  |  |  |  |  |  |
|  | Yes | 1.81 | 1.60 | 1.77 | 1.56 | 1.81 | 1.59 |
| Self-rated health growing up | (Ref: Good) |  |  |  |  |  |  |
|  | Excellent | 1.74 | 1.53 | 1.92 | 1.72 | 2.10 | 1.89 |
|  | Very good | 1.41 | 1.20 | 1.57 | 1.39 | 1.65 | 1.48 |
|  | Fair | 1.60 | 1.25 | 1.72 | 1.40 | 1.64 | 1.31 |
|  | Poor | 1.81 | 1.00 | 1.71 | 1.00 | 1.67 | 1.00 |
| Immigration status | (Ref: Born in this country) |  |  |  |  |  |  |
|  | Born in another country | 1.38 | 1.00 | 1.35 | 1.00 | 1.54 | 1.23 |
| Age 12 religious service attendance | (Ref: Never) |  |  |  |  |  |  |
|  | At least 1/week | 1.76 | 1.55 | 1.75 | 1.55 | 1.70 | 1.49 |
|  | 1-3/month | 1.64 | 1.44 | 1.53 | 1.32 | 1.49 | 1.26 |
|  | < 1/month | 1.55 | 1.37 | 1.49 | 1.30 | 1.42 | 1.22 |
| Year of birth | (Ref: 1998-2005; current age: 18-24) |  |  |  |  |  |  |
|  | 1993-1998; age 25-29 | 1.48 | 1.08 | 1.46 | 1.00 | 1.45 | 1.00 |
|  | 1983-1993; age 30-39 | 1.53 | 1.21 | 1.58 | 1.27 | 1.55 | 1.23 |
|  | 1973-1983; age 40-49 | 1.30 | 1.00 | 1.44 | 1.00 | 1.31 | 1.00 |
|  | 1963-1973; age 50-59 | 1.23 | 1.00 | 1.55 | 1.23 | 1.53 | 1.19 |
|  | 1953-1963; age 60-69 | 1.51 | 1.17 | 1.89 | 1.59 | 1.78 | 1.49 |
|  | 1943-1953; age 70-79 | 1.51 | 1.08 | 2.04 | 1.72 | 1.90 | 1.57 |
|  | 1943 or earlier; age 80+ | 2.20 | 1.70 | 2.71 | 2.14 | 2.66 | 2.17 |
| Gender | (Ref: Male) |  |  |  |  |  |  |
|  | Female | 1.09 | 1.00 | 1.12 | 1.00 | 1.08 | 1.00 |
|  | Other | 1.71 | 1.00 | 1.33 | 1.00 | 1.88 | 1.00 |
| Religious affiliation | (Ref: No religion/Atheist/Agnostic) |  |  |  |  |  |  |
|  | Islam | 1.68 | 1.24 | 1.64 | 1.14 | 1.60 | 1.00 |
|  | Christianity | 1.24 | 1.00 | 1.10 | 1.00 | 1.10 | 1.00 |
|  | Collapsed affiliations with prevalence<3% | 1.81 | 1.00 | 1.59 | 1.00 | 1.31 | 1.00 |
| Race/ethnicity | (Ref: Plurality group) |  |  |  |  |  |  |

Table S6e. Complete-case supplemental analysis of means by demographic category for Germany

|  | | Life Evaluation | | | | Life Satisfaction | | | | Happiness | | | |
| --- | --- | --- | --- | --- | --- | --- | --- | --- | --- | --- | --- | --- | --- |
| Variable | Category | Mean | 95% CI | SE | Global p-value | Mean | 95% CI | SE | Global p-value | Mean | 95% CI | SE | Global p-value |
| Age group | 18-24 | 6.57 | (6.40,6.73) | 0.08 | < .001 | 6.63 | (6.44,6.83) | 0.10 | < .001 | 6.67 | (6.50,6.85) | 0.09 | < .001 |
|  | 25-29 | 6.80 | (6.66,6.93) | 0.07 |  | 6.88 | (6.71,7.05) | 0.09 |  | 6.90 | (6.74,7.05) | 0.08 |  |
|  | 30-39 | 6.88 | (6.79,6.98) | 0.05 |  | 6.96 | (6.85,7.08) | 0.06 |  | 6.97 | (6.86,7.08) | 0.06 |  |
|  | 40-49 | 6.72 | (6.61,6.83) | 0.06 |  | 6.85 | (6.72,6.98) | 0.07 |  | 6.79 | (6.68,6.91) | 0.06 |  |
|  | 50-59 | 6.67 | (6.56,6.78) | 0.06 |  | 6.94 | (6.82,7.06) | 0.06 |  | 6.94 | (6.82,7.05) | 0.06 |  |
|  | 60-69 | 6.79 | (6.69,6.89) | 0.05 |  | 7.13 | (7.01,7.24) | 0.06 |  | 7.04 | (6.94,7.14) | 0.05 |  |
|  | 70-79 | 6.86 | (6.71,7.01) | 0.08 |  | 7.31 | (7.16,7.46) | 0.08 |  | 7.17 | (7.03,7.31) | 0.07 |  |
|  | 80 or older | 7.22 | (6.92,7.53) | 0.15 |  | 7.79 | (7.49,8.09) | 0.15 |  | 7.59 | (7.33,7.84) | 0.13 |  |
| Gender | Female | 6.75 | (6.69,6.82) | 0.03 | 0.052 | 6.95 | (6.88,7.02) | 0.04 | 0.024 | 6.94 | (6.87,7.00) | 0.03 | 0.047 |
|  | Male | 6.79 | (6.73,6.85) | 0.03 |  | 7.04 | (6.97,7.12) | 0.04 |  | 6.98 | (6.91,7.04) | 0.03 |  |
|  | Other | 5.53 | (4.19,6.87) | 0.54 |  | 6.08 | (4.97,7.19) | 0.45 |  | 5.69 | (4.34,7.05) | 0.55 |  |
| Marital status | Divorced | 6.33 | (6.16,6.51) | 0.09 | < .001 | 6.73 | (6.55,6.91) | 0.09 | < .001 | 6.68 | (6.51,6.86) | 0.09 | < .001 |
|  | Domestic partner | 6.81 | (6.65,6.97) | 0.08 |  | 7.02 | (6.84,7.19) | 0.09 |  | 6.97 | (6.81,7.13) | 0.08 |  |
|  | Married | 6.99 | (6.93,7.05) | 0.03 |  | 7.28 | (7.21,7.34) | 0.04 |  | 7.21 | (7.15,7.28) | 0.03 |  |
|  | Separated | 6.52 | (6.28,6.76) | 0.12 |  | 6.60 | (6.29,6.92) | 0.16 |  | 6.60 | (6.31,6.89) | 0.15 |  |
|  | Single/Never been married | 6.48 | (6.40,6.57) | 0.04 |  | 6.57 | (6.48,6.67) | 0.05 |  | 6.57 | (6.48,6.66) | 0.05 |  |
|  | Widowed | 6.93 | (6.72,7.13) | 0.10 |  | 7.07 | (6.83,7.30) | 0.12 |  | 7.02 | (6.81,7.23) | 0.11 |  |
| Employment | Employed for an employer | 6.85 | (6.79,6.91) | 0.03 | < .001 | 7.04 | (6.97,7.11) | 0.03 | < .001 | 7.00 | (6.94,7.07) | 0.03 | < .001 |
|  | Homemaker | 6.24 | (5.92,6.55) | 0.16 |  | 6.63 | (6.30,6.96) | 0.17 |  | 6.68 | (6.35,7.00) | 0.16 |  |
|  | None of these/Other | 6.58 | (6.27,6.89) | 0.16 |  | 6.53 | (6.20,6.87) | 0.17 |  | 6.57 | (6.24,6.90) | 0.17 |  |
|  | Retired | 6.76 | (6.66,6.86) | 0.05 |  | 7.15 | (7.04,7.25) | 0.05 |  | 7.03 | (6.94,7.12) | 0.05 |  |
|  | Self-employed | 6.97 | (6.82,7.11) | 0.07 |  | 7.12 | (6.93,7.30) | 0.09 |  | 7.10 | (6.93,7.26) | 0.08 |  |
|  | Student | 6.73 | (6.55,6.91) | 0.09 |  | 6.71 | (6.49,6.93) | 0.11 |  | 6.70 | (6.50,6.91) | 0.10 |  |
|  | Unemployed and looking for a job | 5.61 | (5.32,5.89) | 0.15 |  | 5.82 | (5.52,6.11) | 0.15 |  | 6.08 | (5.80,6.36) | 0.14 |  |
| Religious service attendance | A few times a year | 7.00 | (6.91,7.09) | 0.04 | < .001 | 7.22 | (7.12,7.31) | 0.05 | < .001 | 7.13 | (7.04,7.22) | 0.05 | < .001 |
|  | More than once a week | 7.17 | (6.93,7.42) | 0.12 |  | 7.48 | (7.19,7.77) | 0.15 |  | 7.43 | (7.15,7.72) | 0.15 |  |
|  | Never | 6.60 | (6.55,6.66) | 0.03 |  | 6.83 | (6.77,6.90) | 0.03 |  | 6.82 | (6.76,6.87) | 0.03 |  |
|  | Once a week | 7.18 | (6.98,7.39) | 0.11 |  | 7.32 | (7.07,7.57) | 0.13 |  | 7.30 | (7.08,7.51) | 0.11 |  |
|  | One to three times a month | 7.02 | (6.84,7.20) | 0.09 |  | 7.29 | (7.09,7.49) | 0.10 |  | 7.16 | (6.97,7.36) | 0.10 |  |
| Education | Up to 8 years | 6.31 | (6.00,6.63) | 0.16 | < .001 | 6.51 | (6.19,6.83) | 0.16 | < .001 | 6.50 | (6.20,6.79) | 0.15 | < .001 |
|  | 16+ years | 7.15 | (7.08,7.22) | 0.03 |  | 7.30 | (7.22,7.38) | 0.04 |  | 7.21 | (7.14,7.29) | 0.04 |  |
|  | 9 to 15 years | 6.59 | (6.53,6.65) | 0.03 |  | 6.85 | (6.79,6.92) | 0.03 |  | 6.84 | (6.78,6.90) | 0.03 |  |
| Immigration status | Born in another country | 6.64 | (6.47,6.81) | 0.09 | 0.109 | 6.78 | (6.59,6.98) | 0.10 | 0.023 | 6.91 | (6.73,7.09) | 0.09 | 0.616 |
|  | Born in this country | 6.78 | (6.74,6.83) | 0.02 |  | 7.01 | (6.96,7.07) | 0.03 |  | 6.96 | (6.91,7.01) | 0.02 |  |
| Religious affiliation | Buddhism | 6.57 | (5.99,7.14) | 0.28 | < .001 | 7.25 | (6.73,7.77) | 0.26 | < .001 | 7.39 | (6.90,7.89) | 0.24 | < .001 |
|  | Christianity | 6.84 | (6.78,6.90) | 0.03 |  | 7.10 | (7.03,7.17) | 0.03 |  | 7.05 | (6.98,7.11) | 0.03 |  |
|  | Confucianism | 7.59 | * | * |  | 8.59 | * | * |  | 8.00 | * | * |  |
|  | Hinduism | 6.13 | (0.00,31.32) | 0.78 |  | 6.84 | (0.00,28.65) | 0.67 |  | 6.67 | (0.00,20.12) | 0.41 |  |
|  | Islam | 6.59 | (6.35,6.83) | 0.12 |  | 6.66 | (6.36,6.96) | 0.15 |  | 6.70 | (6.41,6.99) | 0.15 |  |
|  | Judaism | 6.75 | (5.60,7.90) | 0.42 |  | 7.09 | (5.96,8.22) | 0.42 |  | 7.56 | (6.30,8.82) | 0.47 |  |
|  | No religion/Atheist/Agnostic | 6.71 | (6.64,6.78) | 0.04 |  | 6.90 | (6.82,6.98) | 0.04 |  | 6.86 | (6.78,6.93) | 0.04 |  |
|  | Primal, Animist, or Folk religion | 5.94 | (5.05,6.83) | 0.43 |  | 5.54 | (4.25,6.82) | 0.61 |  | 6.27 | (5.22,7.33) | 0.50 |  |
|  | Sikhism | 8.30 | * | * |  | 8.21 | * | * |  | 8.28 | * | * |  |
|  | Some other religion | 6.24 | (5.37,7.10) | 0.43 |  | 6.56 | (5.70,7.42) | 0.43 |  | 6.62 | (5.72,7.52) | 0.45 |  |
|  | Taoism | 8.00 | * | * |  | 9.00 | * | * |  | 9.00 | * | * |  |
|  | Baha’i | 8.71 | * | * |  | 8.71 | * | * |  | 8.71 | * | * |  |
|  | Shinto | 6.00 | * | * |  | 5.00 | * | * |  | 4.00 | * | * |  |

Table S6f. Complete-case supplemental analysis of childhood predictors regression analysis results for Germany

|  | | Life Evaluation | | | | Life Satisfaction | | | | Happiness | | | |
| --- | --- | --- | --- | --- | --- | --- | --- | --- | --- | --- | --- | --- | --- |
| Variable | Category | Est | 95% CI | SE | Global p-value | Est | 95% CI | SE | Global p-value | Est | 95% CI | SE | Global p-value |
| Relationship with mother | (Ref: Very bad/somewhat bad) |  |  |  | 0.480 |  |  |  | 0.022 |  |  |  | 0.141 |
|  | Very good/somewhat good | 0.07 | (-0.12,0.26) | 0.10 |  | 0.24 | (0.03,0.44) | 0.10 |  | 0.15 | (-0.05,0.35) | 0.10 |  |
| Relationship with father | (Ref: Very bad/somewhat bad) |  |  |  | 0.517 |  |  |  | 0.766 |  |  |  | 0.499 |
|  | Very good/somewhat good | 0.05 | (-0.10,0.20) | 0.08 |  | 0.02 | (-0.14,0.19) | 0.08 |  | -0.05 | (-0.20,0.10) | 0.07 |  |
| Parent marital status | (Ref: Parents married) |  |  |  | 0.123 |  |  |  | 0.051 |  |  |  | 0.093 |
|  | No, one or both of them had died | 0.09 | (-0.21,0.38) | 0.15 |  | 0.00 | (-0.33,0.34) | 0.17 |  | 0.02 | (-0.29,0.33) | 0.16 |  |
|  | No, they were never married | -0.02 | (-0.25,0.21) | 0.12 |  | -0.03 | (-0.29,0.22) | 0.13 |  | 0.01 | (-0.22,0.24) | 0.12 |  |
|  | Yes, married | 0.15 | (-0.01,0.30) | 0.08 |  | 0.18 | (0.01,0.35) | 0.09 |  | 0.16 | (0.00,0.32) | 0.08 |  |
| Subjective financial status of family growing up | (Ref: Got by) |  |  |  | <.001 |  |  |  | <.001 |  |  |  | 0.005 |
|  | Found it difficult | -0.16 | (-0.30,-0.02) | 0.07 |  | -0.14 | (-0.29,0.02) | 0.08 |  | -0.08 | (-0.23,0.06) | 0.07 |  |
|  | Found it very difficult | -0.27 | (-0.58,0.04) | 0.16 |  | -0.16 | (-0.48,0.16) | 0.16 |  | -0.18 | (-0.48,0.11) | 0.15 |  |
|  | Lived comfortably | 0.26 | (0.16,0.37) | 0.05 |  | 0.23 | (0.11,0.35) | 0.06 |  | 0.16 | (0.05,0.27) | 0.06 |  |
| Abuse | (Ref: No) |  |  |  | <.001 |  |  |  | <.001 |  |  |  | 0.001 |
|  | Yes | -0.28 | (-0.43,-0.13) | 0.08 |  | -0.29 | (-0.46,-0.13) | 0.09 |  | -0.26 | (-0.42,-0.11) | 0.08 |  |
| Outsider growing up | (Ref: No) |  |  |  | <.001 |  |  |  | <.001 |  |  |  | <.001 |
|  | Yes | -0.44 | (-0.58,-0.30) | 0.07 |  | -0.46 | (-0.61,-0.31) | 0.08 |  | -0.45 | (-0.61,-0.30) | 0.08 |  |
| Self-rated health growing up | (Ref: Good) |  |  |  | <.001 |  |  |  | <.001 |  |  |  | <.001 |
|  | Excellent | 0.42 | (0.29,0.56) | 0.07 |  | 0.61 | (0.47,0.76) | 0.08 |  | 0.70 | (0.57,0.84) | 0.07 |  |
|  | Fair | -0.21 | (-0.42,-0.01) | 0.10 |  | -0.35 | (-0.58,-0.12) | 0.12 |  | -0.29 | (-0.50,-0.08) | 0.11 |  |
|  | Poor | 0.66 | (0.17,1.15) | 0.25 |  | 0.54 | (0.07,1.01) | 0.24 |  | 0.44 | (-0.05,0.94) | 0.25 |  |
|  | Very good | 0.17 | (0.06,0.29) | 0.06 |  | 0.29 | (0.16,0.42) | 0.07 |  | 0.35 | (0.23,0.47) | 0.06 |  |
| Immigration status | (Ref: Born in this country) |  |  |  | 0.368 |  |  |  | 0.479 |  |  |  | 0.043 |
|  | Born in another country | 0.08 | (-0.10,0.27) | 0.09 |  | 0.07 | (-0.13,0.28) | 0.10 |  | 0.20 | (0.01,0.39) | 0.10 |  |
| Age 12 religious service attendance | (Ref: Never) |  |  |  | <.001 |  |  |  | <.001 |  |  |  | <.001 |
|  | At least once a week | 0.35 | (0.21,0.49) | 0.07 |  | 0.37 | (0.22,0.52) | 0.08 |  | 0.32 | (0.18,0.46) | 0.07 |  |
|  | Less than once a month | 0.21 | (0.09,0.33) | 0.06 |  | 0.17 | (0.04,0.30) | 0.07 |  | 0.11 | (-0.01,0.23) | 0.06 |  |
|  | One to three times a month | 0.27 | (0.14,0.40) | 0.07 |  | 0.20 | (0.05,0.36) | 0.08 |  | 0.18 | (0.04,0.32) | 0.07 |  |
| Year of birth | (Ref: 1998-2005; current age: 18-24) |  |  |  | <.001 |  |  |  | <.001 |  |  |  | <.001 |
|  | 1993-1998; age 25-29 | 0.22 | (0.01,0.42) | 0.11 |  | 0.23 | (-0.01,0.47) | 0.12 |  | 0.21 | (-0.01,0.44) | 0.11 |  |
|  | 1983-1993; age 30-39 | 0.28 | (0.10,0.47) | 0.09 |  | 0.29 | (0.08,0.50) | 0.11 |  | 0.25 | (0.05,0.45) | 0.10 |  |
|  | 1973-1983; age 40-49 | 0.15 | (-0.05,0.34) | 0.10 |  | 0.21 | (-0.01,0.43) | 0.11 |  | 0.11 | (-0.09,0.31) | 0.10 |  |
|  | 1963-1973; age 50-59 | 0.11 | (-0.08,0.31) | 0.10 |  | 0.30 | (0.08,0.52) | 0.11 |  | 0.26 | (0.06,0.46) | 0.10 |  |
|  | 1953-1963; age 60-69 | 0.29 | (0.09,0.48) | 0.10 |  | 0.56 | (0.34,0.77) | 0.11 |  | 0.43 | (0.23,0.63) | 0.10 |  |
|  | 1943-1953; age 70-79 | 0.32 | (0.09,0.54) | 0.11 |  | 0.70 | (0.46,0.94) | 0.12 |  | 0.54 | (0.31,0.76) | 0.11 |  |
|  | 1943 or earlier; age 80+ | 0.72 | (0.39,1.06) | 0.17 |  | 1.19 | (0.84,1.54) | 0.18 |  | 0.98 | (0.66,1.29) | 0.16 |  |
| Gender | (Ref: Male) |  |  |  | 0.600 |  |  |  | 0.751 |  |  |  | 0.601 |
|  | Male | -0.00 | (-0.09,0.08) | 0.05 |  | 0.04 | (-0.06,0.14) | 0.05 |  | -0.01 | (-0.10,0.08) | 0.05 |  |
|  | Other | -0.53 | (-1.56,0.50) | 0.53 |  | 0.06 | (-0.78,0.90) | 0.43 |  | -0.46 | (-1.36,0.44) | 0.46 |  |
| Religious affiliation | (Ref: No religion/Atheist/Agnostic) |  |  |  | 0.244 |  |  |  | 0.199 |  |  |  | 0.286 |
|  | Christianity | -0.04 | (-0.15,0.06) | 0.05 |  | 0.03 | (-0.08,0.15) | 0.06 |  | -0.00 | (-0.11,0.10) | 0.05 |  |
|  | Christianity | -0.04 | (-0.15,0.06) | 0.05 |  | 0.03 | (-0.08,0.15) | 0.06 |  | -0.00 | (-0.11,0.10) | 0.05 |  |
|  | Islam | -0.26 | (-0.51,-0.01) | 0.13 |  | -0.31 | (-0.64,0.01) | 0.17 |  | -0.24 | (-0.54,0.06) | 0.15 |  |
|  | Collapsed affiliations with prevalence<3% | -0.09 | (-0.52,0.34) | 0.22 |  | 0.02 | (-0.42,0.45) | 0.22 |  | 0.23 | (-0.21,0.66) | 0.22 |  |
| Race/ethnicity | (Ref: Plurality group) |  |  |  |  |  |  |  |  |  |  |  |  |

Table S6g. Complete-case supplemental analysis of sensitivity to unmeasured confounding of childhood predictors in Germany

|  | | Life Evaluation | | Life Satisfaction | | Happiness | |
| --- | --- | --- | --- | --- | --- | --- | --- |
| Variable | Category | E-value for Estimate | E-value for 95% CI | E-value for Estimate | E-value for 95% CI | E-value for Estimate | E-value for 95% CI |
| Relationship with mother | (Ref: Very bad/somewhat bad) |  |  |  |  |  |  |
|  | Very good/somewhat good | 1.23 | 1.00 | 1.48 | 1.14 | 1.37 | 1.00 |
| Relationship with father | (Ref: Very bad/somewhat bad) |  |  |  |  |  |  |
|  | Very good/somewhat good | 1.19 | 1.00 | 1.12 | 1.00 | 1.19 | 1.00 |
| Parent marital status | (Ref: Parents married) |  |  |  |  |  |  |
|  | No, one or both of them had died | 1.26 | 1.00 | 1.05 | 1.00 | 1.11 | 1.00 |
|  | No, they were never married | 1.11 | 1.00 | 1.14 | 1.00 | 1.07 | 1.00 |
|  | Yes, married | 1.37 | 1.00 | 1.39 | 1.06 | 1.39 | 1.04 |
| Subjective financial status of family growing up | (Ref: Got by) |  |  |  |  |  |  |
|  | Found it difficult | 1.39 | 1.11 | 1.33 | 1.00 | 1.25 | 1.00 |
|  | Found it very difficult | 1.56 | 1.00 | 1.36 | 1.00 | 1.42 | 1.00 |
|  | Lived comfortably | 1.55 | 1.39 | 1.46 | 1.28 | 1.38 | 1.19 |
| Abuse | (Ref: No) |  |  |  |  |  |  |
|  | Yes | 1.58 | 1.34 | 1.55 | 1.31 | 1.54 | 1.29 |
| Outsider growing up | (Ref: No) |  |  |  |  |  |  |
|  | Yes | 1.83 | 1.62 | 1.78 | 1.57 | 1.82 | 1.60 |
| Self-rated health growing up | (Ref: Good) |  |  |  |  |  |  |
|  | Excellent | 1.80 | 1.59 | 1.98 | 1.78 | 2.19 | 1.98 |
|  | Fair | 1.48 | 1.07 | 1.63 | 1.30 | 1.58 | 1.24 |
|  | Poor | 2.16 | 1.41 | 1.88 | 1.22 | 1.80 | 1.00 |
|  | Very good | 1.41 | 1.20 | 1.55 | 1.36 | 1.67 | 1.49 |
| Immigration status | (Ref: Born in this country) |  |  |  |  |  |  |
|  | Born in another country | 1.26 | 1.00 | 1.22 | 1.00 | 1.44 | 1.06 |
| Age 12 religious service attendance | (Ref: Never) |  |  |  |  |  |  |
|  | At least once a week | 1.68 | 1.47 | 1.66 | 1.45 | 1.62 | 1.42 |
|  | Less than once a month | 1.47 | 1.27 | 1.38 | 1.15 | 1.30 | 1.00 |
|  | One to three times a month | 1.57 | 1.37 | 1.43 | 1.18 | 1.41 | 1.16 |
| Year of birth | (Ref: 1998-2005; current age: 18-24) |  |  |  |  |  |  |
|  | 1993-1998; age 25-29 | 1.48 | 1.08 | 1.46 | 1.00 | 1.46 | 1.00 |
|  | 1983-1993; age 30-39 | 1.58 | 1.28 | 1.55 | 1.24 | 1.52 | 1.19 |
|  | 1973-1983; age 40-49 | 1.37 | 1.00 | 1.43 | 1.00 | 1.30 | 1.00 |
|  | 1963-1973; age 50-59 | 1.31 | 1.00 | 1.56 | 1.24 | 1.54 | 1.21 |
|  | 1953-1963; age 60-69 | 1.59 | 1.27 | 1.90 | 1.61 | 1.78 | 1.49 |
|  | 1943-1953; age 70-79 | 1.64 | 1.28 | 2.10 | 1.78 | 1.94 | 1.62 |
|  | 1943 or earlier; age 80+ | 2.26 | 1.74 | 2.85 | 2.31 | 2.64 | 2.13 |
| Gender | (Ref: Male) |  |  |  |  |  |  |
|  | Male | 1.05 | 1.00 | 1.15 | 1.00 | 1.07 | 1.00 |
|  | Other | 1.96 | 1.00 | 1.20 | 1.00 | 1.83 | 1.00 |
| Religious affiliation | (Ref: No religion/Atheist/Agnostic) |  |  |  |  |  |  |
|  | Christianity | 1.17 | 1.00 | 1.14 | 1.00 | 1.05 | 1.00 |
|  | Christianity | 1.17 | 1.00 | 1.14 | 1.00 | 1.05 | 1.00 |
|  | Islam | 1.55 | 1.06 | 1.58 | 1.00 | 1.51 | 1.00 |
|  | Collapsed affiliations with prevalence<3% | 1.27 | 1.00 | 1.10 | 1.00 | 1.48 | 1.00 |
| Race/ethnicity | (Ref: Plurality group) |  |  |  |  |  |  |

# Tables S7a-g: Hong Kong

Table S7a. Nationally representative descriptive statistics for Hong Kong

| **Characteristic** | **N = 3,012**1 |
| --- | --- |
| **Age group** |  |
| 1998-2005; age 18-24 | 217 (7.2%) |
| 1993-1998; age 25-29 | 198 (6.6%) |
| 1983-1993; age 30-39 | 507 (17%) |
| 1973-1983; age 40-49 | 580 (19%) |
| 1963-1973; age 50-59 | 711 (24%) |
| 1953-1963; age 60-69 | 620 (21%) |
| 1943-1953; age 70-79 | 164 (5.5%) |
| 1943 or earlier; age 80+ | 15 (0.5%) |
| (Missing) | 0 (0%) |
| **Gender** |  |
| Male | 1,390 (46%) |
| Female | 1,620 (54%) |
| Other | 2 (<0.1%) |
| (Missing) | 0 (0%) |
| **Race/Ethnicity** |  |
| Chinese (Cantonese) | 1,930 (64%) |
| Chinese (Chaoshan) | 201 (6.7%) |
| Chinese (Fujianese) | 117 (3.9%) |
| Chinese (Hakka) | 121 (4.0%) |
| Chinese (Other ethnicity) | 264 (8.8%) |
| Chinese (Shanghainese) | 89 (2.9%) |
| East Asian (Korean, Japanese) | 10 (0.3%) |
| Other | 4 (0.1%) |
| South Asian (Indian, Nepalese, Pakistani) | 17 (0.6%) |
| Southeast Asian (Filipino, Indonesian, Thailand) | 46 (1.5%) |
| Taiwanese | 14 (0.4%) |
| White | 15 (0.5%) |
| (Missing) | 184 (6.1%) |
| **Respondent Marital status** |  |
| Married | 2,080 (69%) |
| Separated | 21 (0.7%) |
| Divorced | 105 (3.5%) |
| Widowed | 45 (1.5%) |
| Single, never married | 723 (24%) |
| Domestic Partner | 37 (1.2%) |
| (Missing) | 1 (<0.1%) |
| **Employment** |  |
| Employed for an employer | 2,056 (68%) |
| Self-employed | 245 (8.1%) |
| Retired | 423 (14%) |
| Student | 55 (1.8%) |
| Homemaker | 114 (3.8%) |
| Unemployed and looking for a job | 62 (2.0%) |
| None of these/Other | 39 (1.3%) |
| (Missing) | 18 (0.6%) |
| **Religious service attendance as an adult (now)** |  |
| More than 1/week | 237 (7.9%) |
| 1/week | 567 (19%) |
| 1-3/month | 332 (11%) |
| A few times a year | 543 (18%) |
| Never | 1,332 (44%) |
| (Missing) | 1 (<0.1%) |
| **Education (years)** |  |
| Up to 8 years | 433 (14%) |
| 9-15 years | 2,031 (67%) |
| 16+ years | 547 (18%) |
| (Missing) | 0 (0%) |
| **Immigration status** |  |
| Born in this country | 2,637 (88%) |
| Born in another country | 321 (11%) |
| (Missing) | 53 (1.8%) |
| **Religious affiliation as an adult (now)** |  |
| Christianity | 757 (25%) |
| Islam | 86 (2.8%) |
| Hinduism | 20 (0.7%) |
| Buddhism | 349 (12%) |
| Judaism | 10 (0.3%) |
| Sikhism | 2 (<0.1%) |
| Baha'i | 3 (<0.1%) |
| Jainism | 1 (<0.1%) |
| Shinto | 19 (0.6%) |
| Taoism | 97 (3.2%) |
| Confucianism | 11 (0.4%) |
| Primal, Animist, or Folk religion | 27 (0.9%) |
| Spiritism | 0 (0%) |
| Umbanda, Candomble, and other African-derived religions | 0 (0%) |
| Chinese folk/traditional religion | 106 (3.5%) |
| Some other religion | 4 (0.1%) |
| No religion/Atheist/Agnostic | 1,518 (50%) |
| (Missing) | 5 (0.2%) |
| **Relationship with mother growing up** |  |
| Very good | 1,077 (36%) |
| Somewhat good | 1,164 (39%) |
| Somewhat bad | 293 (9.7%) |
| Very bad | 49 (1.6%) |
| Does not apply | 426 (14%) |
| (Missing) | 3 (<0.1%) |
| **Relationship with father growing up** |  |
| Very good | 868 (29%) |
| Somewhat good | 1,089 (36%) |
| Somewhat bad | 393 (13%) |
| Very bad | 102 (3.4%) |
| Does not apply | 557 (19%) |
| (Missing) | 3 (0.1%) |
| **Parent marital status at age 12** |  |
| Parents married | 2,752 (91%) |
| Divorced | 114 (3.8%) |
| Parents were never married | 40 (1.3%) |
| One or both parents had died | 50 (1.7%) |
| (Missing) | 56 (1.8%) |
| **Subjective financial status of family growing up** |  |
| Lived comfortably | 906 (30%) |
| Got by | 1,527 (51%) |
| Found it difficult | 473 (16%) |
| Found it very difficult | 84 (2.8%) |
| (Missing) | 22 (0.7%) |
| **Abuse** |  |
| Yes | 318 (11%) |
| No | 2,688 (89%) |
| (Missing) | 5 (0.2%) |
| **Outsider growing up** |  |
| Yes | 664 (22%) |
| No | 2,224 (74%) |
| (Missing) | 124 (4.1%) |
| **Self-rated health growing up** |  |
| Excellent | 545 (18%) |
| Very good | 1,073 (36%) |
| Good | 863 (29%) |
| Fair | 426 (14%) |
| Poor | 91 (3.0%) |
| (Missing) | 13 (0.4%) |
| **Age 12 religious service attendance** |  |
| At least 1/week | 432 (14%) |
| 1-3/month | 528 (18%) |
| <1/month | 753 (25%) |
| Never | 1,295 (43%) |
| (Missing) | 4 (0.1%) |
| **Religious affiliation at age 12** |  |
| Christianity | 715 (24%) |
| Islam | 86 (2.9%) |
| Hinduism | 27 (0.9%) |
| Buddhism | 323 (11%) |
| Judaism | 16 (0.5%) |
| Sikhism | 4 (0.1%) |
| Baha'i | 0 (0%) |
| Jainism | 1 (<0.1%) |
| Shinto | 18 (0.6%) |
| Taoism | 81 (2.7%) |
| Confucianism | 10 (0.3%) |
| Primal, Animist, or Folk religion | 15 (0.5%) |
| Spiritism | 0 (0%) |
| Umbanda, Candomble, and other African-derived religions | 0 (0%) |
| Chinese folk/traditional religion | 108 (3.6%) |
| Some other religion | 5 (0.2%) |
| No religion/Atheist/Agnostic | 1,601 (53%) |
| (Missing) | 1 (<0.1%) |
| 1n (%) | |

Table S7b. Means by demographic category for Hong Kong

|  | | Life Evaluation | | | | Life Satisfaction | | | | Happiness | | | |
| --- | --- | --- | --- | --- | --- | --- | --- | --- | --- | --- | --- | --- | --- |
| Variable | Category | Mean | 95% CI | SE | Global p-value | Mean | 95% CI | SE | Global p-value | Mean | 95% CI | SE | Global p-value |
| Age group | 18-24 | 6.94 | (6.70,7.18) | 0.12 | < .001 | 7.03 | (6.77,7.30) | 0.13 | < .001 | 7.22 | (6.99,7.46) | 0.12 | < .001 |
|  | 25-29 | 6.60 | (6.15,7.05) | 0.23 |  | 6.43 | (6.04,6.82) | 0.20 |  | 6.81 | (6.33,7.29) | 0.24 |  |
|  | 30-39 | 6.23 | (6.01,6.44) | 0.11 |  | 6.31 | (6.09,6.53) | 0.11 |  | 6.55 | (6.33,6.78) | 0.11 |  |
|  | 40-49 | 6.76 | (6.56,6.97) | 0.10 |  | 6.87 | (6.66,7.08) | 0.11 |  | 7.03 | (6.82,7.23) | 0.10 |  |
|  | 50-59 | 7.26 | (7.11,7.41) | 0.08 |  | 7.38 | (7.21,7.56) | 0.09 |  | 7.49 | (7.34,7.64) | 0.08 |  |
|  | 60-69 | 7.07 | (6.81,7.33) | 0.13 |  | 7.52 | (7.25,7.79) | 0.14 |  | 7.46 | (7.23,7.69) | 0.12 |  |
|  | 70-79 | 6.76 | (6.20,7.31) | 0.28 |  | 7.32 | (6.86,7.78) | 0.23 |  | 7.50 | (7.07,7.94) | 0.22 |  |
|  | 80 or older | 5.00 | * | * |  | 4.65 | (3.92,5.38) | 0.28 |  | 5.65 | (4.92,6.38) | 0.28 |  |
| Gender | Male | 6.90 | (6.76,7.04) | 0.07 | < .001 | 7.06 | (6.91,7.20) | 0.07 | 0.245 | 7.24 | (7.11,7.36) | 0.07 | < .001 |
|  | Female | 6.80 | (6.67,6.93) | 0.07 |  | 7.01 | (6.87,7.14) | 0.07 |  | 7.10 | (6.97,7.24) | 0.07 |  |
|  | Other | 5.45 | * | * |  | 5.91 | * | * |  | 5.45 | * | * |  |
| Marital status | Married | 7.21 | (7.10,7.33) | 0.06 | < .001 | 7.39 | (7.27,7.51) | 0.06 | < .001 | 7.51 | (7.40,7.62) | 0.06 | < .001 |
|  | Separated | 6.57 | (4.09,9.05) | 1.14 |  | 7.06 | (6.21,7.92) | 0.39 |  | 7.72 | (6.30,9.13) | 0.65 |  |
|  | Divorced | 6.88 | (6.18,7.58) | 0.35 |  | 6.74 | (6.08,7.39) | 0.33 |  | 7.05 | (6.47,7.64) | 0.29 |  |
|  | Widowed | 6.66 | (5.69,7.63) | 0.48 |  | 7.51 | (6.76,8.26) | 0.35 |  | 6.77 | (6.12,7.43) | 0.32 |  |
|  | Never | 5.83 | (5.65,6.01) | 0.09 |  | 6.04 | (5.85,6.24) | 0.10 |  | 6.22 | (6.03,6.41) | 0.10 |  |
|  | Domestic Partner | 6.27 | (5.31,7.23) | 0.47 |  | 6.32 | (5.77,6.86) | 0.27 |  | 6.37 | (5.78,6.96) | 0.29 |  |
| Employment | Employed for an employer | 6.92 | (6.82,7.01) | 0.05 | < .001 | 7.07 | (6.96,7.17) | 0.05 | < .001 | 7.23 | (7.13,7.32) | 0.05 | < .001 |
|  | Self-employed | 7.50 | (7.06,7.94) | 0.22 |  | 7.36 | (6.90,7.83) | 0.24 |  | 7.70 | (7.37,8.03) | 0.17 |  |
|  | Retired | 6.60 | (6.26,6.94) | 0.17 |  | 7.20 | (6.88,7.52) | 0.16 |  | 7.12 | (6.84,7.41) | 0.15 |  |
|  | Student | 6.23 | (5.72,6.74) | 0.25 |  | 6.65 | (6.11,7.20) | 0.27 |  | 6.64 | (6.10,7.17) | 0.26 |  |
|  | Homemaker | 6.51 | (5.99,7.03) | 0.26 |  | 6.70 | (6.11,7.29) | 0.30 |  | 6.94 | (6.40,7.48) | 0.27 |  |
|  | Unemployed and looking for a job | 5.63 | (4.74,6.53) | 0.45 |  | 5.54 | (4.77,6.31) | 0.39 |  | 5.68 | (4.84,6.53) | 0.42 |  |
|  | None of these/Other | 5.39 | (3.71,7.07) | 0.82 |  | 4.89 | (3.47,6.32) | 0.70 |  | 4.66 | (2.79,6.52) | 0.91 |  |
| Religious service attendance | More than 1/week | 9.03 | (8.82,9.25) | 0.11 | < .001 | 8.85 | (8.63,9.07) | 0.11 | < .001 | 9.23 | (9.07,9.40) | 0.09 | < .001 |
|  | 1/week | 7.35 | (7.12,7.57) | 0.12 |  | 7.49 | (7.25,7.74) | 0.12 |  | 7.56 | (7.31,7.81) | 0.13 |  |
|  | 1-3/month | 7.28 | (7.02,7.54) | 0.13 |  | 7.18 | (6.89,7.47) | 0.15 |  | 7.61 | (7.40,7.82) | 0.10 |  |
|  | A few times a year | 6.59 | (6.33,6.85) | 0.13 |  | 6.68 | (6.43,6.94) | 0.13 |  | 6.83 | (6.61,7.05) | 0.11 |  |
|  | Never | 6.24 | (6.11,6.37) | 0.07 |  | 6.61 | (6.47,6.75) | 0.07 |  | 6.65 | (6.52,6.79) | 0.07 |  |
| Education | Up to 8 years | 7.19 | (6.84,7.54) | 0.18 | < .001 | 7.35 | (6.99,7.71) | 0.18 | < .001 | 7.49 | (7.15,7.83) | 0.17 | < .001 |
|  | 9-15 years | 6.86 | (6.75,6.98) | 0.06 |  | 7.05 | (6.93,7.17) | 0.06 |  | 7.20 | (7.10,7.31) | 0.05 |  |
|  | 16+ years | 6.51 | (6.34,6.67) | 0.08 |  | 6.69 | (6.51,6.87) | 0.09 |  | 6.77 | (6.59,6.95) | 0.09 |  |
| Immigration status | Born in this country | 6.92 | (6.83,7.01) | 0.05 | 0.002 | 7.07 | (6.97,7.17) | 0.05 | 0.045 | 7.22 | (7.13,7.31) | 0.05 | 0.012 |
|  | Born in another country | 6.24 | (5.81,6.66) | 0.22 |  | 6.66 | (6.26,7.06) | 0.20 |  | 6.68 | (6.26,7.09) | 0.21 |  |
| Religious affiliation | Christianity | 7.04 | (6.84,7.24) | 0.10 | < .001 | 7.09 | (6.88,7.30) | 0.11 | < .001 | 7.30 | (7.12,7.47) | 0.09 | < .001 |
|  | Islam | 7.69 | (6.82,8.55) | 0.44 |  | 7.47 | (6.48,8.46) | 0.50 |  | 7.86 | (6.73,8.99) | 0.57 |  |
|  | Hinduism | 8.28 | (7.06,9.51) | 0.39 |  | 7.29 | (4.88,9.70) | 0.76 |  | 8.23 | (7.21,9.26) | 0.32 |  |
|  | Buddhism | 7.57 | (7.25,7.89) | 0.16 |  | 7.66 | (7.36,7.95) | 0.15 |  | 7.85 | (7.57,8.13) | 0.14 |  |
|  | Judaism | 8.17 | * | * |  | 7.59 | * | * |  | 8.74 | * | * |  |
|  | Sikhism | 9.08 | * | * |  | 8.82 | * | * |  | 9.26 | * | * |  |
|  | Baha'i | 8.87 | * | * |  | 8.40 | * | * |  | 8.91 | * | * |  |
|  | Jainism | 10.00 | * | * |  | 8.00 | * | * |  | 10.00 | * | * |  |
|  | Shinto | 7.71 | (6.68,8.73) | 0.24 |  | 8.44 | (7.39,9.49) | 0.24 |  | 8.44 | (7.24,9.63) | 0.28 |  |
|  | Taoism | 7.02 | (6.46,7.58) | 0.28 |  | 6.62 | (5.98,7.25) | 0.32 |  | 6.85 | (6.26,7.44) | 0.30 |  |
|  | Confucianism | 7.66 | * | * |  | 7.74 | * | * |  | 7.34 | * | * |  |
|  | Primal, Animist, or Folk religion | 5.96 | (5.03,6.89) | 0.41 |  | 6.44 | (5.42,7.45) | 0.45 |  | 6.34 | (5.31,7.37) | 0.46 |  |
|  | Chinese folk/traditional religion | 7.29 | (6.93,7.65) | 0.18 |  | 7.48 | (7.07,7.88) | 0.20 |  | 7.69 | (7.37,8.02) | 0.16 |  |
|  | Some other religion | 9.23 | * | * |  | 3.51 | * | * |  | 5.18 | * | * |  |
|  | No religion/Atheist/Agnostic | 6.45 | (6.33,6.57) | 0.06 |  | 6.81 | (6.68,6.94) | 0.06 |  | 6.85 | (6.73,6.97) | 0.06 |  |
| Race/Ethnicity | White | 7.39 | (4.41,10.0***ǂ***) | 0.51 | < .001 | 6.62 | (4.55,8.70) | 0.50 | 0.484 | 6.28 | (2.58,9.98) | 0.70 | 0.016 |
|  | Other | 6.42 | * | * |  | 6.42 | * | * |  | 6.92 | * | * |  |
|  | Chinese (Cantonese) | 6.81 | (6.70,6.92) | 0.06 |  | 7.00 | (6.89,7.12) | 0.06 |  | 7.13 | (7.02,7.24) | 0.06 |  |
|  | Chinese (Chaoshan) | 7.13 | (6.80,7.46) | 0.17 |  | 7.28 | (6.89,7.66) | 0.19 |  | 7.49 | (7.16,7.82) | 0.17 |  |
|  | Chinese (Fujianese) | 7.05 | (6.60,7.51) | 0.23 |  | 6.97 | (6.54,7.40) | 0.22 |  | 7.18 | (6.75,7.61) | 0.22 |  |
|  | Chinese (Hakka) | 6.56 | (6.10,7.02) | 0.23 |  | 6.64 | (6.18,7.10) | 0.23 |  | 6.72 | (6.20,7.23) | 0.25 |  |
|  | Chinese (Shanghainese) | 7.08 | (6.32,7.85) | 0.39 |  | 7.06 | (6.41,7.71) | 0.32 |  | 7.22 | (6.48,7.96) | 0.37 |  |
|  | Chinese (Other ethnicity) | 6.81 | (6.48,7.13) | 0.16 |  | 7.17 | (6.74,7.60) | 0.21 |  | 7.20 | (6.91,7.49) | 0.15 |  |
|  | East Asian (Korean, Japanese) | 8.39 | (4.76,10.0***ǂ***) | 0.63 |  | 7.10 | (3.39,10.0***ǂ***) | 0.68 |  | 8.87 | (4.81,10.0***ǂ***) | 0.76 |  |
|  | Southeast Asian (Filipino, Indonesian, Thailand) | 6.83 | (5.00,8.66) | 0.90 |  | 7.34 | (5.58,9.10) | 0.86 |  | 7.37 | (5.29,9.45) | 1.00 |  |
|  | South Asian (Indian, Nepalese, Pakistani) | 6.05 | (1.92,10.0***ǂ***) | 1.30 |  | 6.90 | (3.50,10.0***ǂ***) | 0.89 |  | 7.73 | (6.20,9.26) | 0.51 |  |
|  | Taiwanese | 7.84 | (6.21,9.47) | 0.17 |  | 7.75 | * | * |  | 8.08 | (2.99,10.0***ǂ***) | 0.46 |  |

Table S7c. Childhood predictors regression analysis results for Hong Kong

|  | | Life Evaluation | | | | Life Satisfaction | | | | Happiness | | | |
| --- | --- | --- | --- | --- | --- | --- | --- | --- | --- | --- | --- | --- | --- |
| Variable | Category | Est | 95% CI | SE | Global p-value | Est | 95% CI | SE | Global p-value | Est | 95% CI | SE | Global p-value |
| Relationship with mother | (Ref: Very bad/somewhat bad) |  |  |  | 0.729 |  |  |  | 0.133 |  |  |  | 0.202 |
|  | Very good/somewhat good | 0.04 | (-0.18, 0.25) | 0.11 |  | 0.20 | (-0.07, 0.46) | 0.13 |  | 0.15 | (-0.08, 0.38) | 0.12 |  |
| Relationship with father | (Ref: Very bad/somewhat bad) |  |  |  | 0.006 |  |  |  | 0.157 |  |  |  | 0.008 |
|  | Very good/somewhat good | 0.30 | (0.08, 0.52) | 0.11 |  | 0.18 | (-0.07, 0.43) | 0.13 |  | 0.32 | (0.08, 0.55) | 0.12 |  |
| Parent marital status | (Ref: Parents married) |  |  |  | 0.254 |  |  |  | 0.654 |  |  |  | 0.469 |
|  | Divorced | 0.08 | (-0.42, 0.59) | 0.26 |  | -0.13 | (-0.61, 0.35) | 0.25 |  | -0.12 | (-0.62, 0.38) | 0.25 |  |
|  | Parents were never married | 0.64 | (-0.11, 1.38) | 0.38 |  | 0.45 | (-0.40, 1.30) | 0.43 |  | 0.47 | (-0.20, 1.14) | 0.34 |  |
|  | One or both parents had died | -0.24 | (-0.82, 0.33) | 0.29 |  | -0.23 | (-1.10, 0.64) | 0.44 |  | -0.23 | (-1.02, 0.57) | 0.41 |  |
| Subjective financial status of family growing up | (Ref: Got by) |  |  |  | <.001 |  |  |  | <.001 |  |  |  | <.001 |
|  | Lived comfortably | 0.93 | (0.72, 1.13) | 0.10 |  | 0.82 | (0.60, 1.04) | 0.11 |  | 0.79 | (0.61, 0.98) | 0.10 |  |
|  | Found it difficult | -0.49 | (-0.78, -0.20) | 0.15 |  | -0.48 | (-0.79, -0.17) | 0.16 |  | -0.24 | (-0.51, 0.02) | 0.14 |  |
|  | Found it very difficult | -1.32 | (-1.90, -0.75) | 0.29 |  | -0.81 | (-1.48, -0.14) | 0.34 |  | -0.47 | (-1.21, 0.27) | 0.38 |  |
| Abuse | (Ref: No) |  |  |  | 0.303 |  |  |  | 0.689 |  |  |  | 0.858 |
|  | Yes | 0.14 | (-0.13, 0.41) | 0.14 |  | -0.05 | (-0.33, 0.22) | 0.14 |  | -0.03 | (-0.32, 0.27) | 0.15 |  |
| Outsider growing up | (Ref: No) |  |  |  | 0.065 |  |  |  | 0.069 |  |  |  | 0.808 |
|  | Yes | 0.18 | (-0.01, 0.38) | 0.10 |  | -0.21 | (-0.46, 0.03) | 0.12 |  | -0.02 | (-0.23, 0.20) | 0.11 |  |
| Self-rated health growing up | (Ref: Good) |  |  |  | <.001 |  |  |  | <.001 |  |  |  | <.001 |
|  | Excellent | 1.37 | (1.01, 1.74) | 0.18 |  | 1.50 | (1.13, 1.87) | 0.19 |  | 1.58 | (1.28, 1.88) | 0.15 |  |
|  | Very good | 0.69 | (0.51, 0.87) | 0.09 |  | 0.75 | (0.53, 0.97) | 0.11 |  | 0.81 | (0.62, 1.01) | 0.10 |  |
|  | Fair | -0.60 | (-0.86, -0.34) | 0.13 |  | -0.72 | (-1.01, -0.44) | 0.15 |  | -0.74 | (-1.00, -0.49) | 0.13 |  |
|  | Poor | -1.44 | (-2.22, -0.66) | 0.40 |  | -1.14 | (-1.92, -0.36) | 0.40 |  | -1.53 | (-2.42, -0.63) | 0.46 |  |
| Immigration status | (Ref: Born in this country) |  |  |  | 0.120 |  |  |  | 0.935 |  |  |  | 0.200 |
|  | Born in another country | -0.26 | (-0.58, 0.07) | 0.17 |  | 0.00 | (-0.33, 0.33) | 0.17 |  | -0.22 | (-0.55, 0.12) | 0.17 |  |
| Age 12 religious service attendance | (Ref: Never) |  |  |  | <.001 |  |  |  | <.001 |  |  |  | <.001 |
|  | At least 1/week | 0.61 | (0.29, 0.93) | 0.16 |  | 0.57 | (0.19, 0.95) | 0.19 |  | 0.62 | (0.30, 0.94) | 0.16 |  |
|  | 1-3/month | 0.81 | (0.57, 1.05) | 0.12 |  | 0.55 | (0.27, 0.83) | 0.14 |  | 0.73 | (0.45, 1.00) | 0.14 |  |
|  | < 1/month | 0.12 | (-0.10, 0.34) | 0.11 |  | 0.02 | (-0.21, 0.24) | 0.11 |  | 0.20 | (-0.01, 0.41) | 0.11 |  |
| Year of birth | (Ref: 1998-2005; current age: 18-24) |  |  |  | <.001 |  |  |  | <.001 |  |  |  | <.001 |
|  | 1993-1998; age 25-29 | -0.04 | (-0.37, 0.30) | 0.17 |  | -0.24 | (-0.58, 0.09) | 0.17 |  | -0.05 | (-0.39, 0.28) | 0.17 |  |
|  | 1983-1993; age 30-39 | -0.04 | (-0.29, 0.21) | 0.13 |  | -0.10 | (-0.38, 0.19) | 0.15 |  | -0.01 | (-0.27, 0.25) | 0.13 |  |
|  | 1973-1983; age 40-49 | 0.23 | (-0.02, 0.47) | 0.12 |  | 0.22 | (-0.05, 0.49) | 0.14 |  | 0.22 | (-0.01, 0.46) | 0.12 |  |
|  | 1963-1973; age 50-59 | 0.55 | (0.32, 0.78) | 0.12 |  | 0.54 | (0.27, 0.81) | 0.14 |  | 0.48 | (0.25, 0.71) | 0.12 |  |
|  | 1953-1963; age 60-69 | 0.78 | (0.47, 1.09) | 0.16 |  | 1.01 | (0.67, 1.36) | 0.18 |  | 0.81 | (0.53, 1.08) | 0.14 |  |
|  | 1943-1953; age 70-79 | 0.96 | (0.44, 1.48) | 0.27 |  | 1.13 | (0.54, 1.72) | 0.30 |  | 1.31 | (0.79, 1.83) | 0.26 |  |
|  | 1943 or earlier; age 80+ | -1.51 | (-2.01, -1.01) | 0.26 |  | -1.77 | (-2.75, -0.78) | 0.50 |  | -1.02 | (-2.01, -0.04) | 0.50 |  |
| Gender | (Ref: Male) |  |  |  | <.001 |  |  |  | <.001 |  |  |  | <.001 |
|  | Female | 0.12 | (-0.02, 0.26) | 0.07 |  | 0.21 | (0.06, 0.37) | 0.08 |  | 0.14 | (-0.00, 0.29) | 0.07 |  |
|  | Other | -1.16 | (-1.46, -0.87) | 0.15 |  | -0.86 | (-1.39, -0.33) | 0.27 |  | -1.51 | (-1.81, -1.21) | 0.15 |  |
| Religious affiliation | (Ref: No religion/Atheist/Agnostic) |  |  |  | 0.023 |  |  |  | 0.220 |  |  |  | 0.250 |
|  | Buddhism | 0.13 | (-0.15, 0.40) | 0.14 |  | -0.04 | (-0.33, 0.26) | 0.15 |  | 0.04 | (-0.23, 0.31) | 0.14 |  |
|  | Chinese folk/traditional religion | 0.08 | (-0.20, 0.37) | 0.15 |  | 0.16 | (-0.15, 0.47) | 0.16 |  | 0.07 | (-0.23, 0.37) | 0.15 |  |
|  | Christianity | -0.02 | (-0.30, 0.26) | 0.14 |  | -0.22 | (-0.53, 0.10) | 0.16 |  | -0.15 | (-0.40, 0.10) | 0.13 |  |
|  | Collapsed affiliations with prevalence<3% | 0.42 | (0.13, 0.71) | 0.15 |  | 0.10 | (-0.24, 0.44) | 0.17 |  | 0.19 | (-0.20, 0.58) | 0.20 |  |
| Race/ethnicity | (Ref: Plurality group) |  |  |  | 0.740 |  |  |  | 0.644 |  |  |  | 0.310 |
|  | Non-plurality groups | 0.01 | (-0.16, 0.19) | 0.09 |  | 0.04 | (-0.16, 0.23) | 0.10 |  | 0.08 | (-0.08, 0.25) | 0.08 |  |

Table S7d. Sensitivity to unmeasured confounding of childhood predictors in Hong Kong

|  | | Life Evaluation | | Life Satisfaction | | Happiness | |
| --- | --- | --- | --- | --- | --- | --- | --- |
| Variable | Category | E-value for Estimate | E-value for 95% CI | E-value for Estimate | E-value for 95% CI | E-value for Estimate | E-value for 95% CI |
| Relationship with mother | (Ref: Very bad/somewhat bad) |  |  |  |  |  |  |
|  | Very good/somewhat good | 1.15 | 1.00 | 1.40 | 1.00 | 1.35 | 1.00 |
| Relationship with father | (Ref: Very bad/somewhat bad) |  |  |  |  |  |  |
|  | Very good/somewhat good | 1.55 | 1.24 | 1.38 | 1.00 | 1.58 | 1.23 |
| Parent marital status | (Ref: Parents married) |  |  |  |  |  |  |
|  | Divorced | 1.24 | 1.00 | 1.31 | 1.00 | 1.30 | 1.00 |
|  | Parents were never married | 2.00 | 1.00 | 1.73 | 1.00 | 1.78 | 1.00 |
|  | One or both parents had died | 1.47 | 1.00 | 1.45 | 1.00 | 1.46 | 1.00 |
| Subjective financial status of family growing up | (Ref: Got by) |  |  |  |  |  |  |
|  | Lived comfortably | 2.41 | 2.12 | 2.22 | 1.93 | 2.23 | 1.97 |
|  | Found it difficult | 1.80 | 1.42 | 1.77 | 1.37 | 1.48 | 1.00 |
|  | Found it very difficult | 3.03 | 2.15 | 2.21 | 1.33 | 1.79 | 1.00 |
| Abuse | (Ref: No) |  |  |  |  |  |  |
|  | Yes | 1.33 | 1.00 | 1.18 | 1.00 | 1.12 | 1.00 |
| Outsider growing up | (Ref: No) |  |  |  |  |  |  |
|  | Yes | 1.39 | 1.00 | 1.43 | 1.00 | 1.10 | 1.00 |
| Self-rated health growing up | (Ref: Good) |  |  |  |  |  |  |
|  | Excellent | 3.12 | 2.53 | 3.26 | 2.66 | 3.53 | 2.99 |
|  | Very good | 2.07 | 1.82 | 2.12 | 1.84 | 2.26 | 1.98 |
|  | Fair | 1.95 | 1.60 | 2.08 | 1.72 | 2.16 | 1.81 |
|  | Poor | 3.23 | 2.03 | 2.68 | 1.62 | 3.42 | 2.01 |
| Immigration status | (Ref: Born in this country) |  |  |  |  |  |  |
|  | Born in another country | 1.49 | 1.00 | 1.04 | 1.00 | 1.45 | 1.00 |
| Age 12 religious service attendance | (Ref: Never) |  |  |  |  |  |  |
|  | At least 1/week | 1.96 | 1.54 | 1.89 | 1.40 | 1.98 | 1.55 |
|  | 1-3/month | 2.24 | 1.91 | 1.86 | 1.50 | 2.13 | 1.76 |
|  | < 1/month | 1.30 | 1.00 | 1.10 | 1.00 | 1.42 | 1.00 |
| Year of birth | (Ref: 1998-2005; current age: 18-24) |  |  |  |  |  |  |
|  | 1993-1998; age 25-29 | 1.14 | 1.00 | 1.46 | 1.00 | 1.18 | 1.00 |
|  | 1983-1993; age 30-39 | 1.16 | 1.00 | 1.25 | 1.00 | 1.07 | 1.00 |
|  | 1973-1983; age 40-49 | 1.45 | 1.00 | 1.43 | 1.00 | 1.45 | 1.00 |
|  | 1963-1973; age 50-59 | 1.89 | 1.58 | 1.85 | 1.50 | 1.79 | 1.49 |
|  | 1953-1963; age 60-69 | 2.19 | 1.78 | 2.49 | 2.01 | 2.25 | 1.87 |
|  | 1943-1953; age 70-79 | 2.45 | 1.73 | 2.66 | 1.84 | 3.03 | 2.22 |
|  | 1943 or earlier; age 80+ | 3.36 | 2.53 | 3.75 | 2.17 | 2.56 | 1.15 |
| Gender | (Ref: Male) |  |  |  |  |  |  |
|  | Female | 1.30 | 1.00 | 1.42 | 1.18 | 1.34 | 1.00 |
|  | Other | 2.77 | 2.32 | 2.27 | 1.58 | 3.39 | 2.86 |
| Religious affiliation | (Ref: No religion/Atheist/Agnostic) |  |  |  |  |  |  |
|  | Buddhism | 1.31 | 1.00 | 1.14 | 1.00 | 1.15 | 1.00 |
|  | Chinese folk/traditional religion | 1.24 | 1.00 | 1.35 | 1.00 | 1.22 | 1.00 |
|  | Christianity | 1.11 | 1.00 | 1.43 | 1.00 | 1.35 | 1.00 |
|  | Collapsed affiliations with prevalence<3% | 1.71 | 1.32 | 1.26 | 1.00 | 1.40 | 1.00 |
| Race/ethnicity | (Ref: Plurality group) |  |  |  |  |  |  |
|  | Non-plurality groups | 1.08 | 1.00 | 1.14 | 1.00 | 1.24 | 1.00 |

Table S7e. Complete-case supplemental analysis of means by demographic category for Hong Kong

|  | | Life Evaluation | | | | Life Satisfaction | | | | Happiness | | | |
| --- | --- | --- | --- | --- | --- | --- | --- | --- | --- | --- | --- | --- | --- |
| Variable | Category | Mean | 95% CI | SE | Global p-value | Mean | 95% CI | SE | Global p-value | Mean | 95% CI | SE | Global p-value |
| Age group | 18-24 | 6.94 | (6.70,7.18) | 0.12 | < .001 | 7.06 | (6.80,7.33) | 0.13 | < .001 | 7.26 | (7.03,7.49) | 0.12 | < .001 |
|  | 25-29 | 6.60 | (6.15,7.05) | 0.23 |  | 6.47 | (6.08,6.87) | 0.20 |  | 7.04 | (6.71,7.36) | 0.16 |  |
|  | 30-39 | 6.31 | (6.10,6.52) | 0.10 |  | 6.45 | (6.24,6.65) | 0.10 |  | 6.69 | (6.48,6.90) | 0.11 |  |
|  | 40-49 | 6.87 | (6.67,7.06) | 0.10 |  | 7.02 | (6.83,7.21) | 0.10 |  | 7.16 | (6.97,7.34) | 0.09 |  |
|  | 50-59 | 7.30 | (7.15,7.45) | 0.08 |  | 7.42 | (7.24,7.60) | 0.09 |  | 7.52 | (7.37,7.67) | 0.08 |  |
|  | 60-69 | 7.13 | (6.89,7.36) | 0.12 |  | 7.59 | (7.34,7.84) | 0.13 |  | 7.46 | (7.22,7.69) | 0.12 |  |
|  | 70-79 | 6.76 | (6.20,7.31) | 0.28 |  | 7.31 | (6.87,7.76) | 0.23 |  | 7.50 | (7.07,7.94) | 0.22 |  |
|  | 80 or older | 5.00 | (5.00,5.00) | 0.00 |  | 4.65 | (3.92,5.38) | 0.28 |  | 5.65 | (4.92,6.38) | 0.28 |  |
| Gender | Female | 6.83 | (6.70,6.96) | 0.07 | < .001 | 7.06 | (6.92,7.19) | 0.07 | 0.114 | 7.18 | (7.06,7.30) | 0.06 | < .001 |
|  | Male | 6.98 | (6.86,7.11) | 0.06 |  | 7.17 | (7.04,7.30) | 0.07 |  | 7.31 | (7.19,7.44) | 0.06 |  |
|  | Other | 5.45 | (0.00,1044.03) | 0.35 |  | 5.91 | (0.00,2083.06) | 0.70 |  | 5.45 | (0.00,1044.03) | 0.35 |  |
| Marital status | Divorced | 6.95 | (6.28,7.63) | 0.34 | < .001 | 6.83 | (6.20,7.46) | 0.32 | < .001 | 7.14 | (6.58,7.70) | 0.28 | < .001 |
|  | Domestic partner | 6.42 | (5.52,7.32) | 0.44 |  | 6.30 | (5.74,6.85) | 0.27 |  | 6.37 | (5.78,6.96) | 0.29 |  |
|  | Married | 7.25 | (7.15,7.36) | 0.05 |  | 7.43 | (7.31,7.54) | 0.06 |  | 7.55 | (7.45,7.65) | 0.05 |  |
|  | Separated | 6.57 | (4.09,9.05) | 1.14 |  | 7.06 | (6.21,7.92) | 0.39 |  | 7.72 | (6.30,9.13) | 0.65 |  |
|  | Single/Never been married | 5.92 | (5.75,6.09) | 0.09 |  | 6.22 | (6.05,6.40) | 0.09 |  | 6.40 | (6.23,6.57) | 0.09 |  |
|  | Widowed | 6.66 | (5.69,7.63) | 0.48 |  | 7.50 | (6.98,8.02) | 0.26 |  | 6.77 | (6.12,7.43) | 0.32 |  |
| Employment | Employed for an employer | 6.95 | (6.85,7.04) | 0.05 | < .001 | 7.12 | (7.02,7.22) | 0.05 | < .001 | 7.27 | (7.18,7.37) | 0.05 | < .001 |
|  | Homemaker | 6.62 | (6.14,7.10) | 0.24 |  | 6.74 | (6.17,7.31) | 0.29 |  | 6.97 | (6.43,7.50) | 0.27 |  |
|  | None of these/Other | 5.77 | (4.09,7.46) | 0.82 |  | 5.40 | (3.98,6.82) | 0.69 |  | 6.19 | (5.22,7.17) | 0.48 |  |
|  | Retired | 6.59 | (6.24,6.93) | 0.17 |  | 7.18 | (6.86,7.49) | 0.16 |  | 7.12 | (6.83,7.41) | 0.15 |  |
|  | Self-employed | 7.80 | (7.50,8.10) | 0.15 |  | 7.77 | (7.45,8.09) | 0.16 |  | 7.90 | (7.62,8.19) | 0.15 |  |
|  | Student | 6.33 | (5.86,6.80) | 0.23 |  | 6.64 | (6.09,7.20) | 0.28 |  | 6.64 | (6.10,7.17) | 0.26 |  |
|  | Unemployed and looking for a job | 5.77 | (4.90,6.65) | 0.44 |  | 5.69 | (4.93,6.46) | 0.38 |  | 5.90 | (5.09,6.70) | 0.40 |  |
| Religious service attendance | A few times a year | 6.68 | (6.45,6.91) | 0.12 | < .001 | 6.78 | (6.56,7.00) | 0.11 | < .001 | 6.87 | (6.65,7.09) | 0.11 | < .001 |
|  | More than once a week | 9.03 | (8.82,9.25) | 0.11 |  | 8.85 | (8.62,9.07) | 0.11 |  | 9.23 | (9.07,9.40) | 0.09 |  |
|  | Never | 6.32 | (6.19,6.44) | 0.06 |  | 6.74 | (6.60,6.87) | 0.07 |  | 6.75 | (6.63,6.88) | 0.06 |  |
|  | Once a week | 7.36 | (7.13,7.59) | 0.12 |  | 7.49 | (7.24,7.73) | 0.13 |  | 7.66 | (7.46,7.87) | 0.11 |  |
|  | One to three times a month | 7.28 | (7.02,7.54) | 0.13 |  | 7.19 | (6.90,7.48) | 0.15 |  | 7.62 | (7.42,7.83) | 0.10 |  |
| Education | Up to 8 years | 7.19 | (6.84,7.54) | 0.18 | < .001 | 7.36 | (7.00,7.72) | 0.18 | < .001 | 7.58 | (7.29,7.88) | 0.15 | < .001 |
|  | 16+ years | 6.58 | (6.43,6.73) | 0.08 |  | 6.77 | (6.60,6.94) | 0.09 |  | 6.87 | (6.71,7.04) | 0.08 |  |
|  | 9 to 15 years | 6.93 | (6.82,7.03) | 0.05 |  | 7.14 | (7.04,7.25) | 0.05 |  | 7.26 | (7.16,7.36) | 0.05 |  |
| Immigration status | Born in another country | 6.28 | (5.86,6.70) | 0.22 | 0.002 | 6.73 | (6.34,7.13) | 0.20 | 0.044 | 6.83 | (6.47,7.19) | 0.18 | 0.016 |
|  | Born in this country | 6.98 | (6.89,7.07) | 0.04 |  | 7.15 | (7.06,7.25) | 0.05 |  | 7.29 | (7.20,7.37) | 0.04 |  |
| Religious affiliation | Buddhism | 7.57 | (7.25,7.89) | 0.16 | < .001 | 7.68 | (7.39,7.98) | 0.15 | < .001 | 7.88 | (7.60,8.16) | 0.14 | < .001 |
|  | Christianity | 7.15 | (6.98,7.33) | 0.09 |  | 7.21 | (7.03,7.40) | 0.10 |  | 7.40 | (7.24,7.57) | 0.08 |  |
|  | Confucianism | 7.63 | * | * |  | 7.74 | * | * |  | 7.34 | * | * |  |
|  | Hinduism | 8.28 | (7.06,9.51) | 0.39 |  | 7.29 | (4.88,9.70) | 0.76 |  | 8.23 | (7.21,9.26) | 0.32 |  |
|  | Islam | 7.69 | (6.82,8.55) | 0.44 |  | 7.47 | (6.44,8.50) | 0.52 |  | 8.36 | (7.79,8.93) | 0.29 |  |
|  | Judaism | 8.17 | * | * |  | 7.59 | * | * |  | 8.74 | * | * |  |
|  | No religion/Atheist/Agnostic | 6.50 | (6.38,6.62) | 0.06 |  | 6.88 | (6.75,7.00) | 0.06 |  | 6.90 | (6.78,7.02) | 0.06 |  |
|  | Primal, Animist, or Folk religion | 6.31 | (5.73,6.89) | 0.26 |  | 6.81 | (6.16,7.46) | 0.29 |  | 6.71 | (6.02,7.39) | 0.30 |  |
|  | Sikhism | 9.08 | * | * |  | 8.82 | * | * |  | 9.26 | * | * |  |
|  | Some other religion | 9.23 | * | * |  | 6.00 | * | * |  | 8.84 | * | * |  |
|  | Taoism | 7.08 | (6.53,7.64) | 0.28 |  | 6.65 | (6.01,7.29) | 0.32 |  | 6.89 | (6.30,7.48) | 0.30 |  |
|  | Baha’i | 8.86 | * | * |  | 8.36 | * | * |  | 8.91 | * | * |  |
|  | Jainism | 10.00 | * | * |  | 8.00 | * | * |  | 10.00 | * | * |  |
|  | Shinto | 7.71 | (6.68,8.73) | 0.24 |  | 8.44 | (7.39,9.49) | 0.24 |  | 8.44 | (7.24,9.63) | 0.28 |  |
|  | Chinese folk/traditional religion | 7.29 | (6.92,7.65) | 0.18 |  | 7.48 | (7.08,7.88) | 0.20 |  | 7.69 | (7.37,8.02) | 0.16 |  |

Table S7f. Complete-case supplemental analysis of childhood predictors regression analysis results for Hong Kong

|  | | Life Evaluation | | | | Life Satisfaction | | | | Happiness | | | |
| --- | --- | --- | --- | --- | --- | --- | --- | --- | --- | --- | --- | --- | --- |
| Variable | Category | Est | 95% CI | SE | Global p-value | Est | 95% CI | SE | Global p-value | Est | 95% CI | SE | Global p-value |
| Relationship with mother | (Ref: Very bad/somewhat bad) |  |  |  | 0.541 |  |  |  | 0.138 |  |  |  | 0.123 |
|  | Very good/somewhat good | 0.07 | (-0.15,0.28) | 0.11 |  | 0.19 | (-0.06,0.44) | 0.13 |  | 0.17 | (-0.05,0.40) | 0.11 |  |
| Relationship with father | (Ref: Very bad/somewhat bad) |  |  |  | 0.005 |  |  |  | 0.147 |  |  |  | 0.003 |
|  | Very good/somewhat good | 0.30 | (0.09,0.51) | 0.11 |  | 0.18 | (-0.06,0.43) | 0.13 |  | 0.33 | (0.11,0.55) | 0.11 |  |
| Parent marital status | (Ref: Parents married) |  |  |  | 0.164 |  |  |  | 0.686 |  |  |  | 0.529 |
|  | No, one or both of them had died | -0.18 | (-0.79,0.43) | 0.31 |  | -0.13 | (-1.04,0.77) | 0.46 |  | -0.14 | (-0.98,0.71) | 0.43 |  |
|  | No, they were never married | 0.41 | (-0.39,1.20) | 0.40 |  | 0.39 | (-0.50,1.28) | 0.45 |  | 0.34 | (-0.36,1.04) | 0.36 |  |
|  | Yes, married | -0.26 | (-0.71,0.19) | 0.23 |  | -0.08 | (-0.49,0.34) | 0.21 |  | -0.07 | (-0.51,0.36) | 0.22 |  |
| Subjective financial status of family growing up | (Ref: Got by) |  |  |  | <.001 |  |  |  | <.001 |  |  |  | <.001 |
|  | Found it difficult | -0.52 | (-0.80,-0.24) | 0.14 |  | -0.55 | (-0.84,-0.26) | 0.15 |  | -0.23 | (-0.47,0.02) | 0.12 |  |
|  | Found it very difficult | -1.33 | (-1.86,-0.81) | 0.27 |  | -0.68 | (-1.27,-0.09) | 0.30 |  | -0.36 | (-0.98,0.27) | 0.32 |  |
|  | Lived comfortably | 0.92 | (0.75,1.08) | 0.09 |  | 0.82 | (0.64,1.00) | 0.09 |  | 0.87 | (0.69,1.04) | 0.09 |  |
| Abuse | (Ref: No) |  |  |  | 0.094 |  |  |  | 0.425 |  |  |  | 0.128 |
|  | Yes | 0.22 | (-0.04,0.48) | 0.13 |  | 0.10 | (-0.15,0.34) | 0.12 |  | 0.19 | (-0.05,0.43) | 0.12 |  |
| Outsider growing up | (Ref: No) |  |  |  | 0.049 |  |  |  | 0.090 |  |  |  | 0.822 |
|  | Yes | 0.18 | (0.00,0.36) | 0.09 |  | -0.19 | (-0.41,0.03) | 0.11 |  | -0.02 | (-0.21,0.17) | 0.10 |  |
| Self-rated health growing up | (Ref: Good) |  |  |  | <.001 |  |  |  | <.001 |  |  |  | <.001 |
|  | Excellent | 1.51 | (1.25,1.77) | 0.13 |  | 1.59 | (1.33,1.85) | 0.13 |  | 1.60 | (1.31,1.89) | 0.15 |  |
|  | Fair | -0.51 | (-0.77,-0.26) | 0.13 |  | -0.63 | (-0.90,-0.36) | 0.14 |  | -0.65 | (-0.89,-0.40) | 0.12 |  |
|  | Poor | -1.12 | (-1.84,-0.39) | 0.37 |  | -0.73 | (-1.46,0.00) | 0.37 |  | -0.73 | (-1.34,-0.11) | 0.32 |  |
|  | Very good | 0.68 | (0.50,0.85) | 0.09 |  | 0.74 | (0.53,0.95) | 0.11 |  | 0.80 | (0.61,0.99) | 0.10 |  |
| Immigration status | (Ref: Born in this country) |  |  |  | 0.056 |  |  |  | 0.718 |  |  |  | 0.160 |
|  | Born in another country | -0.31 | (-0.63,0.01) | 0.16 |  | -0.06 | (-0.38,0.26) | 0.16 |  | -0.22 | (-0.52,0.09) | 0.16 |  |
| Age 12 religious service attendance | (Ref: Never) |  |  |  | <.001 |  |  |  | 0.003 |  |  |  | <.001 |
|  | At least once a week | 0.48 | (0.21,0.76) | 0.14 |  | 0.42 | (0.10,0.74) | 0.16 |  | 0.48 | (0.19,0.77) | 0.15 |  |
|  | Less than once a month | 0.14 | (-0.07,0.34) | 0.11 |  | 0.00 | (-0.20,0.21) | 0.10 |  | 0.13 | (-0.06,0.32) | 0.10 |  |
|  | One to three times a month | 0.72 | (0.49,0.96) | 0.12 |  | 0.40 | (0.14,0.66) | 0.13 |  | 0.54 | (0.31,0.77) | 0.12 |  |
| Year of birth | (Ref: 1998-2005; current age: 18-24) |  |  |  | <.001 |  |  |  | <.001 |  |  |  | <.001 |
|  | 1993-1998; age 25-29 | -0.05 | (-0.39,0.29) | 0.17 |  | -0.25 | (-0.60,0.09) | 0.17 |  | 0.05 | (-0.23,0.33) | 0.14 |  |
|  | 1983-1993; age 30-39 | 0.03 | (-0.21,0.27) | 0.12 |  | -0.02 | (-0.30,0.25) | 0.14 |  | 0.05 | (-0.20,0.29) | 0.12 |  |
|  | 1973-1983; age 40-49 | 0.33 | (0.09,0.57) | 0.12 |  | 0.32 | (0.06,0.58) | 0.13 |  | 0.30 | (0.08,0.52) | 0.11 |  |
|  | 1963-1973; age 50-59 | 0.61 | (0.38,0.83) | 0.11 |  | 0.56 | (0.30,0.82) | 0.13 |  | 0.49 | (0.27,0.71) | 0.11 |  |
|  | 1953-1963; age 60-69 | 0.85 | (0.57,1.12) | 0.14 |  | 1.06 | (0.76,1.37) | 0.16 |  | 0.75 | (0.49,1.02) | 0.14 |  |
|  | 1943-1953; age 70-79 | 0.96 | (0.46,1.47) | 0.26 |  | 1.07 | (0.49,1.64) | 0.29 |  | 1.19 | (0.69,1.69) | 0.26 |  |
|  | 1943 or earlier; age 80+ | -1.47 | (-1.92,-1.01) | 0.23 |  | -1.66 | (-2.58,-0.75) | 0.47 |  | -0.97 | (-1.88,-0.06) | 0.47 |  |
| Gender | (Ref: Male) |  |  |  | <.001 |  |  |  | <.001 |  |  |  | <.001 |
|  | Male | -0.08 | (-0.21,0.05) | 0.07 |  | -0.14 | (-0.29,-0.00) | 0.07 |  | -0.11 | (-0.25,0.03) | 0.07 |  |
|  | Other | -1.18 | (-1.42,-0.95) | 0.12 |  | -1.02 | (-1.59,-0.45) | 0.29 |  | -1.63 | (-1.90,-1.37) | 0.14 |  |
| Religious affiliation | (Ref: No religion/Atheist/Agnostic) |  |  |  | 0.012 |  |  |  | 0.460 |  |  |  | 0.147 |
|  | Buddhism | 0.12 | (-0.16,0.40) | 0.14 |  | -0.02 | (-0.31,0.27) | 0.15 |  | 0.09 | (-0.18,0.35) | 0.13 |  |
|  | Christianity | 0.14 | (-0.08,0.35) | 0.11 |  | -0.03 | (-0.27,0.22) | 0.13 |  | 0.03 | (-0.19,0.25) | 0.11 |  |
|  | Christianity | 0.14 | (-0.08,0.35) | 0.11 |  | -0.03 | (-0.27,0.22) | 0.13 |  | 0.03 | (-0.19,0.25) | 0.11 |  |
|  | Chinese folk/traditional religion | 0.11 | (-0.17,0.39) | 0.14 |  | 0.21 | (-0.10,0.52) | 0.16 |  | 0.20 | (-0.08,0.47) | 0.14 |  |
|  | Collapsed affiliations with prevalence<3% | 0.51 | (0.23,0.79) | 0.14 |  | 0.17 | (-0.15,0.50) | 0.17 |  | 0.39 | (0.04,0.73) | 0.18 |  |
| Race/ethnicity | (Ref: Plurality group) |  |  |  |  |  |  |  |  |  |  |  |  |

Table S7g. Complete-case supplemental analysis of sensitivity to unmeasured confounding of childhood predictors in Hong Kong

|  | | Life Evaluation | | Life Satisfaction | | Happiness | |
| --- | --- | --- | --- | --- | --- | --- | --- |
| Variable | Category | E-value for Estimate | E-value for 95% CI | E-value for Estimate | E-value for 95% CI | E-value for Estimate | E-value for 95% CI |
| Relationship with mother | (Ref: Very bad/somewhat bad) |  |  |  |  |  |  |
|  | Very good/somewhat good | 1.21 | 1.00 | 1.41 | 1.00 | 1.40 | 1.00 |
| Relationship with father | (Ref: Very bad/somewhat bad) |  |  |  |  |  |  |
|  | Very good/somewhat good | 1.57 | 1.26 | 1.40 | 1.00 | 1.63 | 1.30 |
| Parent marital status | (Ref: Parents married) |  |  |  |  |  |  |
|  | No, one or both of them had died | 1.40 | 1.00 | 1.32 | 1.00 | 1.34 | 1.00 |
|  | No, they were never married | 1.71 | 1.00 | 1.69 | 1.00 | 1.64 | 1.00 |
|  | Yes, married | 1.51 | 1.00 | 1.23 | 1.00 | 1.23 | 1.00 |
| Subjective financial status of family growing up | (Ref: Got by) |  |  |  |  |  |  |
|  | Found it difficult | 1.87 | 1.49 | 1.91 | 1.51 | 1.48 | 1.00 |
|  | Found it very difficult | 3.15 | 2.29 | 2.09 | 1.26 | 1.66 | 1.00 |
|  | Lived comfortably | 2.45 | 2.20 | 2.29 | 2.03 | 2.42 | 2.15 |
| Abuse | (Ref: No) |  |  |  |  |  |  |
|  | Yes | 1.46 | 1.00 | 1.27 | 1.00 | 1.42 | 1.00 |
| Outsider growing up | (Ref: No) |  |  |  |  |  |  |
|  | Yes | 1.40 | 1.02 | 1.41 | 1.00 | 1.12 | 1.00 |
| Self-rated health growing up | (Ref: Good) |  |  |  |  |  |  |
|  | Excellent | 3.49 | 3.00 | 3.62 | 3.13 | 3.78 | 3.19 |
|  | Fair | 1.87 | 1.52 | 2.02 | 1.65 | 2.09 | 1.73 |
|  | Poor | 2.78 | 1.70 | 2.15 | 1.00 | 2.20 | 1.29 |
|  | Very good | 2.10 | 1.85 | 2.18 | 1.88 | 2.32 | 2.04 |
| Immigration status | (Ref: Born in this country) |  |  |  |  |  |  |
|  | Born in another country | 1.58 | 1.00 | 1.20 | 1.00 | 1.47 | 1.00 |
| Age 12 religious service attendance | (Ref: Never) |  |  |  |  |  |  |
|  | At least once a week | 1.82 | 1.44 | 1.73 | 1.28 | 1.84 | 1.43 |
|  | Less than once a month | 1.33 | 1.00 | 1.04 | 1.00 | 1.33 | 1.00 |
|  | One to three times a month | 2.16 | 1.84 | 1.70 | 1.34 | 1.93 | 1.61 |
| Year of birth | (Ref: 1998-2005; current age: 18-24) |  |  |  |  |  |  |
|  | 1993-1998; age 25-29 | 1.18 | 1.00 | 1.50 | 1.00 | 1.19 | 1.00 |
|  | 1983-1993; age 30-39 | 1.13 | 1.00 | 1.12 | 1.00 | 1.17 | 1.00 |
|  | 1973-1983; age 40-49 | 1.61 | 1.26 | 1.59 | 1.20 | 1.58 | 1.24 |
|  | 1963-1973; age 50-59 | 1.99 | 1.68 | 1.92 | 1.56 | 1.85 | 1.54 |
|  | 1953-1963; age 60-69 | 2.34 | 1.95 | 2.67 | 2.20 | 2.25 | 1.85 |
|  | 1943-1953; age 70-79 | 2.52 | 1.79 | 2.67 | 1.82 | 2.97 | 2.14 |
|  | 1943 or earlier; age 80+ | 3.40 | 2.60 | 3.76 | 2.19 | 2.59 | 1.20 |
| Gender | (Ref: Male) |  |  |  |  |  |  |
|  | Male | 1.24 | 1.00 | 1.34 | 1.02 | 1.29 | 1.00 |
|  | Other | 2.89 | 2.51 | 2.60 | 1.77 | 3.86 | 3.30 |
| Religious affiliation | (Ref: No religion/Atheist/Agnostic) |  |  |  |  |  |  |
|  | Buddhism | 1.30 | 1.00 | 1.11 | 1.00 | 1.25 | 1.00 |
|  | Christianity | 1.34 | 1.00 | 1.13 | 1.00 | 1.14 | 1.00 |
|  | Christianity | 1.34 | 1.00 | 1.13 | 1.00 | 1.14 | 1.00 |
|  | Chinese folk/traditional religion | 1.29 | 1.00 | 1.44 | 1.00 | 1.43 | 1.00 |
|  | Collapsed affiliations with prevalence<3% | 1.85 | 1.47 | 1.39 | 1.00 | 1.71 | 1.17 |
| Race/ethnicity | (Ref: Plurality group) |  |  |  |  |  |  |

# Tables S8a-g: India

Table S8a. Nationally representative descriptive statistics for India

| **Characteristic** | **N = 12,765**1 |
| --- | --- |
| **Age group** |  |
| 1998-2005; age 18-24 | 2,543 (20%) |
| 1993-1998; age 25-29 | 1,640 (13%) |
| 1983-1993; age 30-39 | 3,109 (24%) |
| 1973-1983; age 40-49 | 2,275 (18%) |
| 1963-1973; age 50-59 | 1,574 (12%) |
| 1953-1963; age 60-69 | 1,188 (9.3%) |
| 1943-1953; age 70-79 | 370 (2.9%) |
| 1943 or earlier; age 80+ | 67 (0.5%) |
| (Missing) | 0 (0%) |
| **Gender** |  |
| Male | 6,473 (51%) |
| Female | 6,292 (49%) |
| Other | 0 (0%) |
| (Missing) | 0 (0%) |
| **Race/Ethnicity** |  |
| General | 3,538 (28%) |
| Other backward caste | 4,177 (33%) |
| Schedule caste | 3,599 (28%) |
| Schedule tribe | 1,185 (9.3%) |
| (Missing) | 267 (2.1%) |
| **Respondent Marital status** |  |
| Married | 9,848 (77%) |
| Separated | 45 (0.4%) |
| Divorced | 25 (0.2%) |
| Widowed | 445 (3.5%) |
| Single, never married | 2,065 (16%) |
| Domestic Partner | 269 (2.1%) |
| (Missing) | 69 (0.5%) |
| **Employment** |  |
| Employed for an employer | 2,660 (21%) |
| Self-employed | 3,401 (27%) |
| Retired | 286 (2.2%) |
| Student | 532 (4.2%) |
| Homemaker | 4,221 (33%) |
| Unemployed and looking for a job | 902 (7.1%) |
| None of these/Other | 715 (5.6%) |
| (Missing) | 48 (0.4%) |
| **Religious service attendance as an adult (now)** |  |
| More than 1/week | 2,875 (23%) |
| 1/week | 3,166 (25%) |
| 1-3/month | 2,740 (21%) |
| A few times a year | 2,090 (16%) |
| Never | 1,823 (14%) |
| (Missing) | 71 (0.6%) |
| **Education (years)** |  |
| Up to 8 years | 11,422 (89%) |
| 9-15 years | 1,194 (9.4%) |
| 16+ years | 145 (1.1%) |
| (Missing) | 4 (<0.1%) |
| **Immigration status** |  |
| Born in this country | 12,629 (99%) |
| Born in another country | 110 (0.9%) |
| (Missing) | 26 (0.2%) |
| **Religious affiliation as an adult (now)** |  |
| Christianity | 306 (2.4%) |
| Islam | 1,555 (12%) |
| Hinduism | 10,362 (81%) |
| Buddhism | 230 (1.8%) |
| Judaism | 0 (0%) |
| Sikhism | 127 (1.0%) |
| Baha'i | 0 (0%) |
| Jainism | 10 (<0.1%) |
| Shinto | 1 (<0.1%) |
| Taoism | 0 (0%) |
| Confucianism | 0 (0%) |
| Primal, Animist, or Folk religion | 30 (0.2%) |
| Spiritism | 0 (0%) |
| Umbanda, Candomble, and other African-derived religions | 0 (0%) |
| Chinese folk/traditional religion | 0 (0%) |
| Some other religion | 67 (0.5%) |
| No religion/Atheist/Agnostic | 13 (0.1%) |
| (Missing) | 62 (0.5%) |
| **Relationship with mother growing up** |  |
| Very good | 11,465 (90%) |
| Somewhat good | 788 (6.2%) |
| Somewhat bad | 88 (0.7%) |
| Very bad | 73 (0.6%) |
| Does not apply | 269 (2.1%) |
| (Missing) | 82 (0.6%) |
| **Relationship with father growing up** |  |
| Very good | 10,923 (86%) |
| Somewhat good | 995 (7.8%) |
| Somewhat bad | 126 (1.0%) |
| Very bad | 100 (0.8%) |
| Does not apply | 481 (3.8%) |
| (Missing) | 141 (1.1%) |
| **Parent marital status at age 12** |  |
| Parents married | 5,578 (44%) |
| Divorced | 236 (1.8%) |
| Parents were never married | 1,055 (8.3%) |
| One or both parents had died | 940 (7.4%) |
| (Missing) | 4,956 (39%) |
| **Subjective financial status of family growing up** |  |
| Lived comfortably | 4,946 (39%) |
| Got by | 3,010 (24%) |
| Found it difficult | 2,703 (21%) |
| Found it very difficult | 2,035 (16%) |
| (Missing) | 70 (0.5%) |
| **Abuse** |  |
| Yes | 1,468 (11%) |
| No | 10,526 (82%) |
| (Missing) | 771 (6.0%) |
| **Outsider growing up** |  |
| Yes | 1,926 (15%) |
| No | 10,780 (84%) |
| (Missing) | 59 (0.5%) |
| **Self-rated health growing up** |  |
| Excellent | 2,182 (17%) |
| Very good | 3,882 (30%) |
| Good | 4,028 (32%) |
| Fair | 2,202 (17%) |
| Poor | 424 (3.3%) |
| (Missing) | 47 (0.4%) |
| **Age 12 religious service attendance** |  |
| At least 1/week | 5,288 (41%) |
| 1-3/month | 2,959 (23%) |
| <1/month | 2,719 (21%) |
| Never | 1,478 (12%) |
| (Missing) | 321 (2.5%) |
| **Religious affiliation at age 12** |  |
| Christianity | 254 (2.0%) |
| Islam | 1,550 (12%) |
| Hinduism | 10,417 (82%) |
| Buddhism | 180 (1.4%) |
| Judaism | 0 (0%) |
| Sikhism | 126 (1.0%) |
| Baha'i | 0 (0%) |
| Jainism | 9 (<0.1%) |
| Shinto | 4 (<0.1%) |
| Taoism | 0 (0%) |
| Confucianism | 0 (0%) |
| Primal, Animist, or Folk religion | 27 (0.2%) |
| Spiritism | 0 (0%) |
| Umbanda, Candomble, and other African-derived religions | 0 (0%) |
| Chinese folk/traditional religion | 0 (0%) |
| Some other religion | 59 (0.5%) |
| No religion/Atheist/Agnostic | 7 (<0.1%) |
| (Missing) | 131 (1.0%) |
| 1n (%) | |

Table S8b. Means by demographic category for India

|  | | Life Evaluation | | | | Life Satisfaction | | | | Happiness | | | |
| --- | --- | --- | --- | --- | --- | --- | --- | --- | --- | --- | --- | --- | --- |
| Variable | Category | Mean | 95% CI | SE | Global p-value | Mean | 95% CI | SE | Global p-value | Mean | 95% CI | SE | Global p-value |
| Age group | 18-24 | 6.11 | (5.91,6.32) | 0.10 | < .001 | 7.51 | (7.32,7.70) | 0.10 | < .001 | 7.18 | (6.99,7.36) | 0.09 | < .001 |
|  | 25-29 | 5.65 | (5.44,5.85) | 0.11 |  | 7.13 | (6.94,7.33) | 0.10 |  | 6.63 | (6.43,6.82) | 0.10 |  |
|  | 30-39 | 5.54 | (5.39,5.69) | 0.08 |  | 6.94 | (6.80,7.08) | 0.07 |  | 6.43 | (6.27,6.58) | 0.08 |  |
|  | 40-49 | 5.40 | (5.23,5.57) | 0.09 |  | 6.81 | (6.65,6.97) | 0.08 |  | 6.23 | (6.05,6.40) | 0.09 |  |
|  | 50-59 | 5.33 | (5.11,5.55) | 0.11 |  | 6.62 | (6.41,6.83) | 0.11 |  | 5.99 | (5.76,6.21) | 0.11 |  |
|  | 60-69 | 5.49 | (5.22,5.75) | 0.14 |  | 6.75 | (6.49,7.02) | 0.14 |  | 5.98 | (5.69,6.27) | 0.15 |  |
|  | 70-79 | 5.77 | (5.33,6.22) | 0.23 |  | 6.92 | (6.47,7.38) | 0.23 |  | 6.53 | (6.05,7.02) | 0.25 |  |
|  | 80 or older | 6.47 | (5.29,7.66) | 0.59 |  | 7.71 | (6.53,8.89) | 0.59 |  | 6.87 | (5.57,8.16) | 0.65 |  |
| Gender | Male | 5.40 | (5.27,5.52) | 0.06 | < .001 | 6.87 | (6.75,6.99) | 0.06 | < .001 | 6.38 | (6.27,6.50) | 0.06 | 0.011 |
|  | Female | 5.86 | (5.74,5.98) | 0.06 |  | 7.14 | (7.03,7.25) | 0.06 |  | 6.57 | (6.45,6.69) | 0.06 |  |
| Marital status | Married | 5.64 | (5.55,5.74) | 0.05 | < .001 | 7.04 | (6.95,7.13) | 0.05 | < .001 | 6.48 | (6.38,6.57) | 0.05 | < .001 |
|  | Separated | 4.29 | (2.95,5.64) | 0.66 |  | 5.40 | (3.90,6.90) | 0.73 |  | 5.34 | (3.92,6.76) | 0.70 |  |
|  | Divorced | 3.29 | (1.67,4.91) | 0.76 |  | 6.04 | (3.63,8.44) | 1.14 |  | 3.89 | (2.09,5.68) | 0.85 |  |
|  | Widowed | 4.82 | (4.40,5.25) | 0.22 |  | 5.59 | (5.11,6.06) | 0.24 |  | 5.06 | (4.61,5.50) | 0.23 |  |
|  | Never | 5.85 | (5.66,6.05) | 0.10 |  | 7.20 | (7.00,7.41) | 0.10 |  | 6.88 | (6.69,7.06) | 0.10 |  |
|  | Domestic Partner | 5.03 | (4.35,5.70) | 0.34 |  | 6.85 | (6.19,7.52) | 0.34 |  | 6.10 | (5.49,6.71) | 0.31 |  |
| Employment | Employed for an employer | 5.20 | (5.01,5.38) | 0.09 | < .001 | 6.71 | (6.54,6.89) | 0.09 | < .001 | 6.18 | (6.01,6.35) | 0.09 | < .001 |
|  | Self-employed | 5.70 | (5.54,5.86) | 0.08 |  | 7.14 | (6.97,7.30) | 0.08 |  | 6.70 | (6.54,6.85) | 0.08 |  |
|  | Retired | 5.87 | (5.37,6.37) | 0.25 |  | 6.97 | (6.42,7.52) | 0.28 |  | 6.68 | (6.14,7.22) | 0.27 |  |
|  | Student | 6.20 | (5.84,6.56) | 0.18 |  | 7.20 | (6.86,7.54) | 0.17 |  | 7.00 | (6.68,7.32) | 0.16 |  |
|  | Homemaker | 5.87 | (5.73,6.01) | 0.07 |  | 7.17 | (7.04,7.30) | 0.06 |  | 6.47 | (6.34,6.61) | 0.07 |  |
|  | Unemployed and looking for a job | 5.20 | (4.90,5.50) | 0.15 |  | 6.62 | (6.30,6.94) | 0.16 |  | 6.25 | (5.96,6.54) | 0.15 |  |
|  | None of these/Other | 5.43 | (5.05,5.82) | 0.20 |  | 6.78 | (6.42,7.14) | 0.18 |  | 6.35 | (5.96,6.73) | 0.19 |  |
| Religious service attendance | More than 1/week | 5.61 | (5.43,5.78) | 0.09 | 0.193 | 7.01 | (6.84,7.18) | 0.09 | < .001 | 6.41 | (6.24,6.59) | 0.09 | 0.002 |
|  | 1/week | 5.78 | (5.61,5.96) | 0.09 |  | 7.29 | (7.13,7.44) | 0.08 |  | 6.66 | (6.50,6.82) | 0.08 |  |
|  | 1-3/month | 5.62 | (5.45,5.79) | 0.09 |  | 7.05 | (6.89,7.22) | 0.08 |  | 6.59 | (6.43,6.75) | 0.08 |  |
|  | A few times a year | 5.49 | (5.33,5.65) | 0.08 |  | 6.86 | (6.68,7.04) | 0.09 |  | 6.41 | (6.24,6.58) | 0.09 |  |
|  | Never | 5.54 | (5.32,5.77) | 0.11 |  | 6.59 | (6.36,6.82) | 0.12 |  | 6.15 | (5.93,6.38) | 0.11 |  |
| Education | Up to 8 years | 5.61 | (5.51,5.70) | 0.05 | 0.022 | 6.96 | (6.87,7.06) | 0.05 | < .001 | 6.41 | (6.32,6.51) | 0.05 | < .001 |
|  | 9-15 years | 5.73 | (5.52,5.94) | 0.11 |  | 7.31 | (7.13,7.49) | 0.09 |  | 6.95 | (6.76,7.15) | 0.10 |  |
|  | 16+ years | 6.20 | (5.77,6.63) | 0.22 |  | 7.51 | (7.09,7.93) | 0.21 |  | 7.53 | (7.12,7.94) | 0.21 |  |
| Immigration status | Born in this country | 5.63 | (5.54,5.72) | 0.05 | 0.658 | 7.00 | (6.92,7.09) | 0.04 | 0.602 | 6.49 | (6.40,6.58) | 0.05 | 0.003 |
|  | Born in another country | 5.46 | (4.69,6.22) | 0.39 |  | 6.76 | (5.81,7.71) | 0.48 |  | 5.26 | (4.41,6.12) | 0.43 |  |
| Religious affiliation | Christianity | 6.25 | (5.80,6.71) | 0.23 | < .001 | 7.33 | (6.87,7.80) | 0.24 | < .001 | 7.33 | (6.94,7.71) | 0.20 | < .001 |
|  | Islam | 5.65 | (5.38,5.92) | 0.14 |  | 7.04 | (6.80,7.28) | 0.12 |  | 6.27 | (6.00,6.54) | 0.14 |  |
|  | Hinduism | 5.62 | (5.52,5.72) | 0.05 |  | 6.99 | (6.89,7.08) | 0.05 |  | 6.47 | (6.37,6.56) | 0.05 |  |
|  | Buddhism | 5.42 | (4.80,6.04) | 0.31 |  | 7.04 | (6.46,7.62) | 0.29 |  | 6.89 | (6.33,7.45) | 0.29 |  |
|  | Sikhism | 5.13 | (4.33,5.92) | 0.40 |  | 7.05 | (6.59,7.51) | 0.23 |  | 6.65 | (6.13,7.17) | 0.26 |  |
|  | Jainism | 5.95 | * | * |  | 7.15 | * | * |  | 6.38 | * | * |  |
|  | Shinto | 10.00 | * | * |  | 9.52 | * | * |  | 10.00 | * | * |  |
|  | Primal, Animist, or Folk religion | 5.22 | (4.45,5.98) | 0.36 |  | 7.24 | (5.84,8.64) | 0.67 |  | 5.86 | (4.85,6.88) | 0.48 |  |
|  | Some other religion | 5.34 | (4.40,6.28) | 0.47 |  | 7.20 | (6.03,8.36) | 0.58 |  | 7.40 | (6.23,8.57) | 0.58 |  |
|  | No religion/Atheist/Agnostic | 4.52 | (0.00,10.0***ǂ***) | 1.44 |  | 4.97 | (0.00,10.0***ǂ***) | 1.34 |  | 6.25 | (2.00,10.0***ǂ***) | 0.82 |  |
| Race/Ethnicity | General | 5.67 | (5.50,5.83) | 0.08 | 0.005 | 7.05 | (6.90,7.21) | 0.08 | 0.755 | 6.68 | (6.52,6.83) | 0.08 | 0.010 |
|  | Other backward caste | 5.54 | (5.38,5.69) | 0.08 |  | 7.00 | (6.85,7.15) | 0.08 |  | 6.34 | (6.19,6.49) | 0.08 |  |
|  | Schedule caste | 5.55 | (5.41,5.69) | 0.07 |  | 6.95 | (6.80,7.10) | 0.08 |  | 6.41 | (6.25,6.58) | 0.08 |  |
|  | Schedule tribe | 6.05 | (5.78,6.32) | 0.14 |  | 7.03 | (6.80,7.25) | 0.12 |  | 6.53 | (6.27,6.80) | 0.14 |  |

Table S8c. Childhood predictors regression analysis results for India

|  | | Life Evaluation | | | | Life Satisfaction | | | | Happiness | | | |
| --- | --- | --- | --- | --- | --- | --- | --- | --- | --- | --- | --- | --- | --- |
| Variable | Category | Est | 95% CI | SE | Global p-value | Est | 95% CI | SE | Global p-value | Est | 95% CI | SE | Global p-value |
| Relationship with mother | (Ref: Very bad/somewhat bad) |  |  |  | 0.114 |  |  |  | 0.481 |  |  |  | 0.726 |
|  | Very good/somewhat good | 0.46 | (-0.11, 1.03) | 0.29 |  | 0.20 | (-0.37, 0.77) | 0.29 |  | 0.11 | (-0.53, 0.76) | 0.33 |  |
| Relationship with father | (Ref: Very bad/somewhat bad) |  |  |  | 0.419 |  |  |  | 0.605 |  |  |  | 0.289 |
|  | Very good/somewhat good | -0.22 | (-0.76, 0.33) | 0.28 |  | -0.11 | (-0.60, 0.38) | 0.25 |  | -0.26 | (-0.74, 0.22) | 0.25 |  |
| Parent marital status | (Ref: Parents married) |  |  |  | <.001 |  |  |  | 0.001 |  |  |  | <.001 |
|  | Divorced | -0.14 | (-0.76, 0.49) | 0.31 |  | 0.23 | (-0.20, 0.65) | 0.22 |  | -0.15 | (-0.63, 0.32) | 0.24 |  |
|  | Parents were never married | -0.70 | (-0.95, -0.45) | 0.13 |  | -0.45 | (-0.72, -0.18) | 0.13 |  | -0.52 | (-0.87, -0.18) | 0.17 |  |
|  | One or both parents had died | -0.54 | (-0.81, -0.28) | 0.14 |  | -0.03 | (-0.29, 0.23) | 0.13 |  | -0.36 | (-0.68, -0.04) | 0.16 |  |
| Subjective financial status of family growing up | (Ref: Got by) |  |  |  | <.001 |  |  |  | <.001 |  |  |  | <.001 |
|  | Lived comfortably | 0.35 | (0.15, 0.55) | 0.10 |  | 0.22 | (0.02, 0.41) | 0.10 |  | 0.23 | (0.02, 0.44) | 0.11 |  |
|  | Found it difficult | -0.24 | (-0.47, -0.01) | 0.12 |  | -0.28 | (-0.50, -0.06) | 0.11 |  | -0.36 | (-0.60, -0.13) | 0.12 |  |
|  | Found it very difficult | -0.24 | (-0.50, 0.02) | 0.13 |  | -0.41 | (-0.65, -0.18) | 0.12 |  | -0.41 | (-0.66, -0.15) | 0.13 |  |
| Abuse | (Ref: No) |  |  |  | 0.102 |  |  |  | 0.011 |  |  |  | <.001 |
|  | Yes | 0.20 | (-0.04, 0.44) | 0.12 |  | -0.30 | (-0.58, -0.02) | 0.14 |  | -0.47 | (-0.73, -0.21) | 0.13 |  |
| Outsider growing up | (Ref: No) |  |  |  | 0.006 |  |  |  | 0.172 |  |  |  | 0.014 |
|  | Yes | -0.34 | (-0.58, -0.10) | 0.12 |  | -0.15 | (-0.37, 0.07) | 0.11 |  | -0.30 | (-0.55, -0.06) | 0.12 |  |
| Self-rated health growing up | (Ref: Good) |  |  |  | <.001 |  |  |  | 0.001 |  |  |  | <.001 |
|  | Excellent | -0.17 | (-0.41, 0.07) | 0.12 |  | 0.03 | (-0.21, 0.26) | 0.12 |  | 0.06 | (-0.20, 0.32) | 0.13 |  |
|  | Very good | -0.10 | (-0.30, 0.11) | 0.10 |  | 0.07 | (-0.11, 0.25) | 0.09 |  | -0.01 | (-0.19, 0.18) | 0.10 |  |
|  | Fair | -0.45 | (-0.68, -0.22) | 0.12 |  | -0.31 | (-0.53, -0.08) | 0.11 |  | -0.36 | (-0.59, -0.13) | 0.12 |  |
|  | Poor | -0.99 | (-1.46, -0.51) | 0.24 |  | -0.55 | (-0.99, -0.11) | 0.23 |  | -0.65 | (-1.09, -0.22) | 0.22 |  |
| Immigration status | (Ref: Born in this country) |  |  |  | 0.661 |  |  |  | 0.705 |  |  |  | 0.022 |
|  | Born in another country | -0.16 | (-0.89, 0.57) | 0.37 |  | -0.15 | (-1.04, 0.73) | 0.45 |  | -0.97 | (-1.82, -0.13) | 0.43 |  |
| Age 12 religious service attendance | (Ref: Never) |  |  |  | 0.649 |  |  |  | 0.437 |  |  |  | 0.339 |
|  | At least 1/week | 0.15 | (-0.11, 0.40) | 0.13 |  | 0.14 | (-0.08, 0.37) | 0.12 |  | 0.22 | (-0.04, 0.48) | 0.13 |  |
|  | 1-3/month | 0.11 | (-0.18, 0.39) | 0.14 |  | 0.17 | (-0.09, 0.43) | 0.13 |  | 0.12 | (-0.16, 0.41) | 0.15 |  |
|  | < 1/month | 0.06 | (-0.21, 0.34) | 0.14 |  | 0.05 | (-0.22, 0.31) | 0.14 |  | 0.11 | (-0.18, 0.40) | 0.15 |  |
| Year of birth | (Ref: 1998-2005; current age: 18-24) |  |  |  | <.001 |  |  |  | <.001 |  |  |  | <.001 |
|  | 1993-1998; age 25-29 | -0.42 | (-0.69, -0.16) | 0.14 |  | -0.35 | (-0.60, -0.10) | 0.13 |  | -0.52 | (-0.77, -0.27) | 0.13 |  |
|  | 1983-1993; age 30-39 | -0.51 | (-0.74, -0.29) | 0.12 |  | -0.52 | (-0.76, -0.29) | 0.12 |  | -0.69 | (-0.93, -0.46) | 0.12 |  |
|  | 1973-1983; age 40-49 | -0.60 | (-0.86, -0.34) | 0.13 |  | -0.62 | (-0.86, -0.38) | 0.12 |  | -0.86 | (-1.10, -0.61) | 0.13 |  |
|  | 1963-1973; age 50-59 | -0.61 | (-0.91, -0.31) | 0.15 |  | -0.76 | (-1.04, -0.47) | 0.15 |  | -1.04 | (-1.33, -0.74) | 0.15 |  |
|  | 1953-1963; age 60-69 | -0.45 | (-0.77, -0.13) | 0.16 |  | -0.61 | (-0.94, -0.29) | 0.17 |  | -1.06 | (-1.40, -0.71) | 0.18 |  |
|  | 1943-1953; age 70-79 | -0.15 | (-0.66, 0.36) | 0.26 |  | -0.47 | (-0.95, 0.01) | 0.24 |  | -0.54 | (-1.06, -0.03) | 0.26 |  |
|  | 1943 or earlier; age 80+ | 0.31 | (-0.85, 1.48) | 0.59 |  | 0.16 | (-0.99, 1.31) | 0.59 |  | -0.34 | (-1.60, 0.91) | 0.64 |  |
| Gender | (Ref: Male) |  |  |  | <.001 |  |  |  | 0.004 |  |  |  | 0.090 |
|  | Female | 0.43 | (0.27, 0.58) | 0.08 |  | 0.22 | (0.07, 0.37) | 0.08 |  | 0.13 | (-0.02, 0.28) | 0.08 |  |
| Religious affiliation | (Ref: Hinduism) |  |  |  | 0.834 |  |  |  | 0.308 |  |  |  | <.001 |
|  | Islam | -0.03 | (-0.30, 0.25) | 0.14 |  | -0.03 | (-0.28, 0.22) | 0.13 |  | -0.29 | (-0.57, -0.02) | 0.14 |  |
|  | Collapsed affiliations with prevalence<3% | 0.09 | (-0.25, 0.43) | 0.17 |  | 0.22 | (-0.08, 0.52) | 0.15 |  | 0.51 | (0.22, 0.80) | 0.15 |  |
| Race/ethnicity | (Ref: Plurality group) |  |  |  | 0.130 |  |  |  | 0.875 |  |  |  | 0.035 |
|  | Non-plurality groups | 0.13 | (-0.04, 0.30) | 0.09 |  | 0.01 | (-0.16, 0.18) | 0.09 |  | 0.18 | (0.01, 0.36) | 0.09 |  |

Table S8d. Sensitivity to unmeasured confounding of childhood predictors in India

|  | | Life Evaluation | | Life Satisfaction | | Happiness | |
| --- | --- | --- | --- | --- | --- | --- | --- |
| Variable | Category | E-value for Estimate | E-value for 95% CI | E-value for Estimate | E-value for 95% CI | E-value for Estimate | E-value for 95% CI |
| Relationship with mother | (Ref: Very bad/somewhat bad) |  |  |  |  |  |  |
|  | Very good/somewhat good | 1.49 | 1.00 | 1.29 | 1.00 | 1.20 | 1.00 |
| Relationship with father | (Ref: Very bad/somewhat bad) |  |  |  |  |  |  |
|  | Very good/somewhat good | 1.30 | 1.00 | 1.20 | 1.00 | 1.34 | 1.00 |
| Parent marital status | (Ref: Parents married) |  |  |  |  |  |  |
|  | Divorced | 1.23 | 1.00 | 1.32 | 1.00 | 1.24 | 1.00 |
|  | Parents were never married | 1.68 | 1.49 | 1.50 | 1.28 | 1.55 | 1.28 |
|  | One or both parents had died | 1.56 | 1.35 | 1.10 | 1.00 | 1.42 | 1.14 |
| Subjective financial status of family growing up | (Ref: Got by) |  |  |  |  |  |  |
|  | Lived comfortably | 1.41 | 1.24 | 1.31 | 1.08 | 1.31 | 1.09 |
|  | Found it difficult | 1.32 | 1.05 | 1.36 | 1.14 | 1.42 | 1.22 |
|  | Found it very difficult | 1.32 | 1.00 | 1.47 | 1.27 | 1.46 | 1.24 |
| Abuse | (Ref: No) |  |  |  |  |  |  |
|  | Yes | 1.29 | 1.00 | 1.38 | 1.10 | 1.51 | 1.30 |
| Outsider growing up | (Ref: No) |  |  |  |  |  |  |
|  | Yes | 1.40 | 1.19 | 1.25 | 1.00 | 1.38 | 1.14 |
| Self-rated health growing up | (Ref: Good) |  |  |  |  |  |  |
|  | Excellent | 1.26 | 1.00 | 1.10 | 1.00 | 1.14 | 1.00 |
|  | Very good | 1.18 | 1.00 | 1.16 | 1.00 | 1.04 | 1.00 |
|  | Fair | 1.49 | 1.30 | 1.38 | 1.17 | 1.42 | 1.22 |
|  | Poor | 1.89 | 1.54 | 1.58 | 1.20 | 1.65 | 1.31 |
| Immigration status | (Ref: Born in this country) |  |  |  |  |  |  |
|  | Born in another country | 1.25 | 1.00 | 1.25 | 1.00 | 1.88 | 1.22 |
| Age 12 religious service attendance | (Ref: Never) |  |  |  |  |  |  |
|  | At least 1/week | 1.24 | 1.00 | 1.24 | 1.00 | 1.30 | 1.00 |
|  | 1-3/month | 1.20 | 1.00 | 1.27 | 1.00 | 1.22 | 1.00 |
|  | < 1/month | 1.15 | 1.00 | 1.12 | 1.00 | 1.20 | 1.00 |
| Year of birth | (Ref: 1998-2005; current age: 18-24) |  |  |  |  |  |  |
|  | 1993-1998; age 25-29 | 1.47 | 1.25 | 1.42 | 1.20 | 1.54 | 1.35 |
|  | 1983-1993; age 30-39 | 1.54 | 1.36 | 1.56 | 1.38 | 1.68 | 1.50 |
|  | 1973-1983; age 40-49 | 1.60 | 1.41 | 1.63 | 1.44 | 1.80 | 1.61 |
|  | 1963-1973; age 50-59 | 1.61 | 1.38 | 1.74 | 1.52 | 1.93 | 1.71 |
|  | 1953-1963; age 60-69 | 1.49 | 1.23 | 1.63 | 1.37 | 1.95 | 1.69 |
|  | 1943-1953; age 70-79 | 1.24 | 1.00 | 1.51 | 1.00 | 1.56 | 1.09 |
|  | 1943 or earlier; age 80+ | 1.38 | 1.00 | 1.26 | 1.00 | 1.41 | 1.00 |
| Gender | (Ref: Male) |  |  |  |  |  |  |
|  | Female | 1.47 | 1.34 | 1.31 | 1.16 | 1.22 | 1.00 |
| Religious affiliation | (Ref: Hinduism) |  |  |  |  |  |  |
|  | Islam | 1.09 | 1.00 | 1.09 | 1.00 | 1.37 | 1.08 |
|  | Collapsed affiliations with prevalence<3% | 1.18 | 1.00 | 1.31 | 1.00 | 1.54 | 1.31 |
| Race/ethnicity | (Ref: Plurality group) |  |  |  |  |  |  |
|  | Non-plurality groups | 1.22 | 1.00 | 1.06 | 1.00 | 1.27 | 1.06 |

Table S8e. Complete-case supplemental analysis of means by demographic category for India

|  | | Life Evaluation | | | | Life Satisfaction | | | | Happiness | | | |
| --- | --- | --- | --- | --- | --- | --- | --- | --- | --- | --- | --- | --- | --- |
| Variable | Category | Mean | 95% CI | SE | Global p-value | Mean | 95% CI | SE | Global p-value | Mean | 95% CI | SE | Global p-value |
| Age group | 18-24 | 6.94 | (6.75,7.13) | 0.10 | < .001 | 8.24 | (8.10,8.38) | 0.07 | < .001 | 7.91 | (7.75,8.06) | 0.08 | < .001 |
|  | 25-29 | 6.56 | (6.37,6.74) | 0.10 |  | 7.94 | (7.79,8.10) | 0.08 |  | 7.57 | (7.41,7.72) | 0.08 |  |
|  | 30-39 | 6.51 | (6.38,6.64) | 0.07 |  | 7.72 | (7.60,7.84) | 0.06 |  | 7.35 | (7.23,7.47) | 0.06 |  |
|  | 40-49 | 6.41 | (6.25,6.56) | 0.08 |  | 7.58 | (7.45,7.72) | 0.07 |  | 7.20 | (7.06,7.34) | 0.07 |  |
|  | 50-59 | 6.41 | (6.22,6.59) | 0.09 |  | 7.44 | (7.26,7.62) | 0.09 |  | 7.02 | (6.84,7.20) | 0.09 |  |
|  | 60-69 | 6.49 | (6.24,6.74) | 0.13 |  | 7.56 | (7.32,7.80) | 0.12 |  | 7.14 | (6.91,7.38) | 0.12 |  |
|  | 70-79 | 6.71 | (6.31,7.12) | 0.21 |  | 7.85 | (7.50,8.21) | 0.18 |  | 7.53 | (7.15,7.91) | 0.19 |  |
|  | 80 or older | 7.29 | (6.28,8.30) | 0.50 |  | 8.44 | (7.56,9.33) | 0.44 |  | 7.94 | (7.00,8.88) | 0.47 |  |
| Gender | Female | 6.79 | (6.68,6.90) | 0.06 | < .001 | 7.90 | (7.81,8.00) | 0.05 | < .001 | 7.58 | (7.48,7.68) | 0.05 | < .001 |
|  | Male | 6.38 | (6.27,6.49) | 0.05 |  | 7.67 | (7.58,7.77) | 0.05 |  | 7.26 | (7.17,7.36) | 0.05 |  |
| Marital status | Divorced | 4.18 | (2.44,5.93) | 0.82 | < .001 | 7.73 | (5.94,9.52) | 0.85 | < .001 | 5.76 | (4.14,7.37) | 0.76 | < .001 |
|  | Domestic partner | 5.97 | (5.51,6.42) | 0.23 |  | 7.56 | (6.92,8.19) | 0.32 |  | 7.07 | (6.67,7.48) | 0.21 |  |
|  | Married | 6.60 | (6.51,6.69) | 0.05 |  | 7.78 | (7.70,7.85) | 0.04 |  | 7.40 | (7.32,7.48) | 0.04 |  |
|  | Separated | 5.71 | (4.21,7.21) | 0.74 |  | 6.97 | (5.62,8.32) | 0.67 |  | 7.05 | (5.90,8.20) | 0.57 |  |
|  | Single/Never been married | 6.72 | (6.55,6.89) | 0.09 |  | 8.04 | (7.89,8.19) | 0.08 |  | 7.67 | (7.51,7.82) | 0.08 |  |
|  | Widowed | 6.01 | (5.63,6.40) | 0.20 |  | 7.06 | (6.68,7.43) | 0.19 |  | 6.76 | (6.37,7.14) | 0.19 |  |
| Employment | Employed for an employer | 6.23 | (6.07,6.40) | 0.09 | < .001 | 7.55 | (7.40,7.71) | 0.08 | 0.006 | 7.19 | (7.04,7.33) | 0.08 | < .001 |
|  | Homemaker | 6.79 | (6.65,6.92) | 0.07 |  | 7.87 | (7.76,7.97) | 0.06 |  | 7.52 | (7.41,7.63) | 0.06 |  |
|  | None of these/Other | 6.63 | (6.30,6.97) | 0.17 |  | 7.78 | (7.51,8.06) | 0.14 |  | 7.44 | (7.12,7.75) | 0.16 |  |
|  | Retired | 6.46 | (5.98,6.94) | 0.24 |  | 7.63 | (7.18,8.09) | 0.23 |  | 7.39 | (6.98,7.80) | 0.21 |  |
|  | Self-employed | 6.59 | (6.45,6.72) | 0.07 |  | 7.85 | (7.72,7.98) | 0.07 |  | 7.41 | (7.27,7.55) | 0.07 |  |
|  | Student | 6.93 | (6.64,7.22) | 0.15 |  | 8.06 | (7.83,8.29) | 0.12 |  | 7.79 | (7.57,8.02) | 0.12 |  |
|  | Unemployed and looking for a job | 6.41 | (6.14,6.69) | 0.14 |  | 7.76 | (7.51,8.01) | 0.13 |  | 7.42 | (7.19,7.65) | 0.12 |  |
| Religious service attendance | A few times a year | 6.38 | (6.23,6.52) | 0.07 | 0.015 | 7.66 | (7.52,7.80) | 0.07 | 0.008 | 7.24 | (7.09,7.40) | 0.08 | 0.012 |
|  | More than once a week | 6.57 | (6.41,6.72) | 0.08 |  | 7.83 | (7.69,7.97) | 0.07 |  | 7.39 | (7.25,7.52) | 0.07 |  |
|  | Never | 6.63 | (6.43,6.84) | 0.10 |  | 7.63 | (7.45,7.81) | 0.09 |  | 7.34 | (7.17,7.51) | 0.09 |  |
|  | Once a week | 6.71 | (6.57,6.86) | 0.07 |  | 7.96 | (7.84,8.08) | 0.06 |  | 7.57 | (7.44,7.70) | 0.07 |  |
|  | One to three times a month | 6.57 | (6.42,6.73) | 0.08 |  | 7.74 | (7.61,7.88) | 0.07 |  | 7.45 | (7.31,7.59) | 0.07 |  |
| Education | Up to 8 years | 6.60 | (6.52,6.69) | 0.05 | 0.125 | 7.78 | (7.70,7.86) | 0.04 | 0.500 | 7.40 | (7.33,7.48) | 0.04 | 0.057 |
|  | 16+ years | 6.43 | (6.01,6.86) | 0.21 |  | 7.95 | (7.61,8.29) | 0.17 |  | 7.87 | (7.49,8.25) | 0.19 |  |
|  | 9 to 15 years | 6.41 | (6.23,6.59) | 0.09 |  | 7.85 | (7.69,8.01) | 0.08 |  | 7.47 | (7.29,7.65) | 0.09 |  |
| Immigration status | Born in another country | 6.19 | (5.57,6.81) | 0.31 | 0.208 | 7.00 | (6.04,7.96) | 0.49 | 0.103 | 6.26 | (5.67,6.86) | 0.30 | < .001 |
|  | Born in this country | 6.59 | (6.50,6.67) | 0.04 |  | 7.80 | (7.72,7.87) | 0.04 |  | 7.43 | (7.35,7.50) | 0.04 |  |
| Religious affiliation | Buddhism | 6.53 | (6.07,6.99) | 0.23 | < .001 | 7.93 | (7.53,8.33) | 0.20 | < .001 | 7.56 | (7.14,7.97) | 0.21 | < .001 |
|  | Christianity | 7.03 | (6.55,7.51) | 0.24 |  | 8.20 | (7.85,8.56) | 0.18 |  | 7.92 | (7.54,8.30) | 0.19 |  |
|  | Hinduism | 6.58 | (6.49,6.67) | 0.05 |  | 7.78 | (7.70,7.85) | 0.04 |  | 7.41 | (7.33,7.49) | 0.04 |  |
|  | Islam | 6.58 | (6.32,6.84) | 0.13 |  | 7.83 | (7.60,8.06) | 0.12 |  | 7.37 | (7.14,7.60) | 0.12 |  |
|  | No religion/Atheist/Agnostic | 4.78 | (0.00,12.69) | 1.53 |  | 6.60 | (1.56,11.65) | 0.97 |  | 6.91 | (2.82,11.00) | 0.79 |  |
|  | Primal, Animist, or Folk religion | 6.29 | (5.26,7.32) | 0.49 |  | 7.36 | (6.06,8.65) | 0.61 |  | 6.09 | (5.16,7.02) | 0.44 |  |
|  | Sikhism | 6.43 | (5.96,6.89) | 0.23 |  | 7.43 | (6.89,7.98) | 0.28 |  | 7.28 | (6.69,7.87) | 0.30 |  |
|  | Some other religion | 6.17 | (5.20,7.14) | 0.48 |  | 7.66 | (6.69,8.63) | 0.48 |  | 7.78 | (7.12,8.44) | 0.33 |  |
|  | Jainism | 6.29 | (0.00,5.00) | 0.97 |  | 7.23 | (0.00,4.00) | 0.84 |  | 6.90 | (0.00,5.00) | 0.99 |  |
|  | Shinto | 10.00 | * | * |  | 10.00 | * | * |  | 10.00 | * | * |  |

Table S8f. Complete-case supplemental analysis of childhood predictors regression analysis results for India

|  | | Life Evaluation | | | | Life Satisfaction | | | | Happiness | | | |
| --- | --- | --- | --- | --- | --- | --- | --- | --- | --- | --- | --- | --- | --- |
| Variable | Category | Est | 95% CI | SE | Global p-value | Est | 95% CI | SE | Global p-value | Est | 95% CI | SE | Global p-value |
| Relationship with mother | (Ref: Very bad/somewhat bad) |  |  |  | 0.541 |  |  |  | 0.297 |  |  |  | 0.741 |
|  | Very good/somewhat good | -0.15 | (-0.63,0.33) | 0.25 |  | 0.22 | (-0.19,0.63) | 0.21 |  | -0.07 | (-0.51,0.36) | 0.22 |  |
| Relationship with father | (Ref: Very bad/somewhat bad) |  |  |  | 0.873 |  |  |  | 0.509 |  |  |  | 0.716 |
|  | Very good/somewhat good | 0.04 | (-0.41,0.48) | 0.23 |  | 0.12 | (-0.24,0.49) | 0.19 |  | 0.07 | (-0.32,0.47) | 0.20 |  |
| Parent marital status | (Ref: Parents married) |  |  |  | 0.002 |  |  |  | <.001 |  |  |  | <.001 |
|  | No, one or both of them had died | 0.16 | (-0.34,0.66) | 0.26 |  | 0.21 | (-0.19,0.61) | 0.20 |  | 0.05 | (-0.33,0.44) | 0.20 |  |
|  | No, they were never married | -0.21 | (-0.69,0.27) | 0.25 |  | -0.28 | (-0.67,0.11) | 0.20 |  | -0.40 | (-0.78,-0.02) | 0.19 |  |
|  | Yes, married | -0.26 | (-0.71,0.19) | 0.23 |  | -0.36 | (-0.72,-0.00) | 0.18 |  | -0.35 | (-0.71,0.00) | 0.18 |  |
| Subjective financial status of family growing up | (Ref: Got by) |  |  |  | <.001 |  |  |  | <.001 |  |  |  | <.001 |
|  | Found it difficult | -0.17 | (-0.37,0.03) | 0.10 |  | -0.19 | (-0.37,-0.01) | 0.09 |  | -0.27 | (-0.45,-0.08) | 0.09 |  |
|  | Found it very difficult | -0.27 | (-0.52,-0.02) | 0.13 |  | -0.46 | (-0.66,-0.27) | 0.10 |  | -0.47 | (-0.67,-0.27) | 0.10 |  |
|  | Lived comfortably | 0.22 | (0.04,0.41) | 0.09 |  | 0.03 | (-0.11,0.18) | 0.08 |  | 0.04 | (-0.12,0.20) | 0.08 |  |
| Abuse | (Ref: No) |  |  |  | <.001 |  |  |  | 0.800 |  |  |  | 0.219 |
|  | Yes | 0.50 | (0.30,0.70) | 0.10 |  | 0.02 | (-0.16,0.21) | 0.09 |  | 0.12 | (-0.07,0.30) | 0.10 |  |
| Outsider growing up | (Ref: No) |  |  |  | 0.592 |  |  |  | 0.432 |  |  |  | 0.519 |
|  | Yes | 0.06 | (-0.16,0.27) | 0.11 |  | 0.07 | (-0.10,0.24) | 0.09 |  | 0.06 | (-0.12,0.24) | 0.09 |  |
| Self-rated health growing up | (Ref: Good) |  |  |  | <.001 |  |  |  | 0.016 |  |  |  | <.001 |
|  | Excellent | -0.34 | (-0.54,-0.14) | 0.10 |  | -0.10 | (-0.30,0.10) | 0.10 |  | -0.07 | (-0.27,0.13) | 0.10 |  |
|  | Fair | -0.34 | (-0.53,-0.14) | 0.10 |  | -0.21 | (-0.38,-0.03) | 0.09 |  | -0.30 | (-0.48,-0.13) | 0.09 |  |
|  | Poor | -0.61 | (-1.02,-0.21) | 0.21 |  | -0.30 | (-0.68,0.07) | 0.19 |  | -0.47 | (-0.83,-0.10) | 0.19 |  |
|  | Very good | -0.14 | (-0.32,0.04) | 0.09 |  | 0.06 | (-0.09,0.20) | 0.07 |  | 0.04 | (-0.12,0.19) | 0.08 |  |
| Immigration status | (Ref: Born in this country) |  |  |  | 0.356 |  |  |  | 0.189 |  |  |  | <.001 |
|  | Born in another country | -0.27 | (-0.83,0.30) | 0.29 |  | -0.59 | (-1.47,0.29) | 0.45 |  | -0.90 | (-1.43,-0.37) | 0.27 |  |
| Age 12 religious service attendance | (Ref: Never) |  |  |  | 0.757 |  |  |  | 0.488 |  |  |  | 0.582 |
|  | At least once a week | 0.06 | (-0.16,0.28) | 0.11 |  | 0.13 | (-0.06,0.32) | 0.10 |  | 0.05 | (-0.15,0.26) | 0.10 |  |
|  | Less than once a month | 0.08 | (-0.17,0.32) | 0.13 |  | 0.11 | (-0.11,0.33) | 0.11 |  | -0.06 | (-0.28,0.17) | 0.12 |  |
|  | One to three times a month | 0.14 | (-0.12,0.39) | 0.13 |  | 0.16 | (-0.05,0.38) | 0.11 |  | -0.03 | (-0.25,0.18) | 0.11 |  |
| Year of birth | (Ref: 1998-2005; current age: 18-24) |  |  |  | 0.003 |  |  |  | <.001 |  |  |  | <.001 |
|  | 1993-1998; age 25-29 | -0.35 | (-0.60,-0.10) | 0.13 |  | -0.29 | (-0.49,-0.10) | 0.10 |  | -0.33 | (-0.53,-0.13) | 0.10 |  |
|  | 1983-1993; age 30-39 | -0.39 | (-0.60,-0.18) | 0.11 |  | -0.51 | (-0.68,-0.33) | 0.09 |  | -0.53 | (-0.72,-0.34) | 0.10 |  |
|  | 1973-1983; age 40-49 | -0.48 | (-0.72,-0.24) | 0.12 |  | -0.63 | (-0.81,-0.45) | 0.09 |  | -0.67 | (-0.87,-0.47) | 0.10 |  |
|  | 1963-1973; age 50-59 | -0.47 | (-0.73,-0.21) | 0.13 |  | -0.76 | (-0.99,-0.53) | 0.12 |  | -0.84 | (-1.07,-0.61) | 0.12 |  |
|  | 1953-1963; age 60-69 | -0.40 | (-0.70,-0.09) | 0.15 |  | -0.64 | (-0.91,-0.37) | 0.14 |  | -0.71 | (-0.99,-0.43) | 0.14 |  |
|  | 1943-1953; age 70-79 | -0.14 | (-0.60,0.32) | 0.23 |  | -0.36 | (-0.74,0.01) | 0.19 |  | -0.35 | (-0.74,0.04) | 0.20 |  |
|  | 1943 or earlier; age 80+ | 0.25 | (-0.74,1.24) | 0.51 |  | 0.12 | (-0.74,0.98) | 0.44 |  | -0.07 | (-0.98,0.84) | 0.46 |  |
| Gender | (Ref: Male) |  |  |  | <.001 |  |  |  | <.001 |  |  |  | <.001 |
|  | Male | -0.41 | (-0.55,-0.27) | 0.07 |  | -0.21 | (-0.33,-0.10) | 0.06 |  | -0.30 | (-0.42,-0.17) | 0.06 |  |
| Religious affiliation | (Ref: Hinduism) |  |  |  | 0.875 |  |  |  | 0.714 |  |  |  | 0.220 |
|  | Islam | 0.04 | (-0.21,0.30) | 0.13 |  | 0.01 | (-0.22,0.24) | 0.12 |  | -0.11 | (-0.34,0.13) | 0.12 |  |
|  | Collapsed affiliations with prevalence<3% | 0.07 | (-0.24,0.38) | 0.16 |  | 0.10 | (-0.14,0.35) | 0.13 |  | 0.17 | (-0.08,0.41) | 0.13 |  |
| Race/ethnicity | (Ref: Plurality group) |  |  |  | 0.231 |  |  |  | 0.778 |  |  |  | 0.100 |
|  | Non-plurality groups | 0.09 | (-0.06,0.25) | 0.08 |  | 0.02 | (-0.11,0.15) | 0.07 |  | 0.11 | (-0.02,0.25) | 0.07 |  |

Table S8g. Complete-case supplemental analysis of sensitivity to unmeasured confounding of childhood predictors in India

|  | | Life Evaluation | | Life Satisfaction | | Happiness | |
| --- | --- | --- | --- | --- | --- | --- | --- |
| Variable | Category | E-value for Estimate | E-value for 95% CI | E-value for Estimate | E-value for 95% CI | E-value for Estimate | E-value for 95% CI |
| Relationship with mother | (Ref: Very bad/somewhat bad) |  |  |  |  |  |  |
|  | Very good/somewhat good | 1.27 | 1.00 | 1.36 | 1.00 | 1.18 | 1.00 |
| Relationship with father | (Ref: Very bad/somewhat bad) |  |  |  |  |  |  |
|  | Very good/somewhat good | 1.12 | 1.00 | 1.25 | 1.00 | 1.18 | 1.00 |
| Parent marital status | (Ref: Parents married) |  |  |  |  |  |  |
|  | No, one or both of them had died | 1.28 | 1.00 | 1.35 | 1.00 | 1.15 | 1.00 |
|  | No, they were never married | 1.34 | 1.00 | 1.43 | 1.00 | 1.54 | 1.10 |
|  | Yes, married | 1.38 | 1.00 | 1.51 | 1.02 | 1.50 | 1.00 |
| Subjective financial status of family growing up | (Ref: Got by) |  |  |  |  |  |  |
|  | Found it difficult | 1.29 | 1.00 | 1.33 | 1.06 | 1.41 | 1.20 |
|  | Found it very difficult | 1.39 | 1.08 | 1.61 | 1.42 | 1.61 | 1.42 |
|  | Lived comfortably | 1.35 | 1.13 | 1.12 | 1.00 | 1.13 | 1.00 |
| Abuse | (Ref: No) |  |  |  |  |  |  |
|  | Yes | 1.61 | 1.42 | 1.10 | 1.00 | 1.24 | 1.00 |
| Outsider growing up | (Ref: No) |  |  |  |  |  |  |
|  | Yes | 1.15 | 1.00 | 1.18 | 1.00 | 1.16 | 1.00 |
| Self-rated health growing up | (Ref: Good) |  |  |  |  |  |  |
|  | Excellent | 1.46 | 1.25 | 1.22 | 1.00 | 1.18 | 1.00 |
|  | Fair | 1.46 | 1.25 | 1.35 | 1.11 | 1.45 | 1.26 |
|  | Poor | 1.71 | 1.33 | 1.45 | 1.00 | 1.61 | 1.22 |
|  | Very good | 1.25 | 1.00 | 1.16 | 1.00 | 1.12 | 1.00 |
| Immigration status | (Ref: Born in this country) |  |  |  |  |  |  |
|  | Born in another country | 1.39 | 1.00 | 1.74 | 1.00 | 2.03 | 1.51 |
| Age 12 religious service attendance | (Ref: Never) |  |  |  |  |  |  |
|  | At least once a week | 1.16 | 1.00 | 1.26 | 1.00 | 1.15 | 1.00 |
|  | Less than once a month | 1.18 | 1.00 | 1.24 | 1.00 | 1.16 | 1.00 |
|  | One to three times a month | 1.25 | 1.00 | 1.30 | 1.00 | 1.12 | 1.00 |
| Year of birth | (Ref: 1998-2005; current age: 18-24) |  |  |  |  |  |  |
|  | 1993-1998; age 25-29 | 1.47 | 1.22 | 1.44 | 1.22 | 1.47 | 1.25 |
|  | 1983-1993; age 30-39 | 1.51 | 1.31 | 1.66 | 1.48 | 1.67 | 1.49 |
|  | 1973-1983; age 40-49 | 1.59 | 1.36 | 1.78 | 1.60 | 1.80 | 1.61 |
|  | 1963-1973; age 50-59 | 1.58 | 1.33 | 1.91 | 1.68 | 1.97 | 1.74 |
|  | 1953-1963; age 60-69 | 1.51 | 1.20 | 1.79 | 1.52 | 1.85 | 1.58 |
|  | 1943-1953; age 70-79 | 1.26 | 1.00 | 1.52 | 1.00 | 1.49 | 1.00 |
|  | 1943 or earlier; age 80+ | 1.38 | 1.00 | 1.25 | 1.00 | 1.17 | 1.00 |
| Gender | (Ref: Male) |  |  |  |  |  |  |
|  | Male | 1.52 | 1.39 | 1.36 | 1.22 | 1.44 | 1.31 |
| Religious affiliation | (Ref: Hinduism) |  |  |  |  |  |  |
|  | Islam | 1.13 | 1.00 | 1.05 | 1.00 | 1.23 | 1.00 |
|  | Collapsed affiliations with prevalence<3% | 1.17 | 1.00 | 1.23 | 1.00 | 1.30 | 1.00 |
| Race/ethnicity | (Ref: Plurality group) |  |  |  |  |  |  |
|  | Non-plurality groups | 1.20 | 1.00 | 1.09 | 1.00 | 1.24 | 1.00 |

# Tables S9a-g: Indonesia

Table S9a. Nationally representative descriptive statistics for Indonesia

| **Characteristic** | **N = 6,992**1 |
| --- | --- |
| **Age group** |  |
| 1998-2005; age 18-24 | 1,216 (17%) |
| 1993-1998; age 25-29 | 849 (12%) |
| 1983-1993; age 30-39 | 1,591 (23%) |
| 1973-1983; age 40-49 | 1,576 (23%) |
| 1963-1973; age 50-59 | 1,169 (17%) |
| 1953-1963; age 60-69 | 490 (7.0%) |
| 1943-1953; age 70-79 | 83 (1.2%) |
| 1943 or earlier; age 80+ | 17 (0.2%) |
| (Missing) | 0 (0%) |
| **Gender** |  |
| Male | 3,461 (50%) |
| Female | 3,513 (50%) |
| Other | 7 (<0.1%) |
| (Missing) | 11 (0.2%) |
| **Race/Ethnicity** |  |
| Bali | 69 (1.0%) |
| Banjar/Melayu Banjar | 320 (4.6%) |
| Batak | 165 (2.4%) |
| Betawi | 251 (3.6%) |
| Bugis | 243 (3.5%) |
| Jawa | 2,846 (41%) |
| Madura | 262 (3.7%) |
| Makasar | 91 (1.3%) |
| Minangkabau | 273 (3.9%) |
| Other | 1,262 (18%) |
| Sunda/Parahyangan | 1,172 (17%) |
| (Missing) | 38 (0.5%) |
| **Respondent Marital status** |  |
| Married | 4,846 (69%) |
| Separated | 81 (1.2%) |
| Divorced | 196 (2.8%) |
| Widowed | 425 (6.1%) |
| Single, never married | 1,381 (20%) |
| Domestic Partner | 18 (0.3%) |
| (Missing) | 45 (0.6%) |
| **Employment** |  |
| Employed for an employer | 1,323 (19%) |
| Self-employed | 2,187 (31%) |
| Retired | 78 (1.1%) |
| Student | 272 (3.9%) |
| Homemaker | 2,138 (31%) |
| Unemployed and looking for a job | 529 (7.6%) |
| None of these/Other | 448 (6.4%) |
| (Missing) | 18 (0.3%) |
| **Religious service attendance as an adult (now)** |  |
| More than 1/week | 2,667 (38%) |
| 1/week | 2,529 (36%) |
| 1-3/month | 786 (11%) |
| A few times a year | 659 (9.4%) |
| Never | 332 (4.8%) |
| (Missing) | 18 (0.3%) |
| **Education (years)** |  |
| Up to 8 years | 3,079 (44%) |
| 9-15 years | 3,491 (50%) |
| 16+ years | 419 (6.0%) |
| (Missing) | 2 (<0.1%) |
| **Immigration status** |  |
| Born in this country | 6,958 (100%) |
| Born in another country | 34 (0.5%) |
| (Missing) | 0 (0%) |
| **Religious affiliation as an adult (now)** |  |
| Christianity | 504 (7.2%) |
| Islam | 6,406 (92%) |
| Hinduism | 73 (1.0%) |
| Buddhism | 3 (<0.1%) |
| Judaism | 0 (0%) |
| Sikhism | 0 (0%) |
| Baha'i | 0 (0%) |
| Jainism | 0 (0%) |
| Shinto | 0 (0%) |
| Taoism | 1 (<0.1%) |
| Confucianism | 0 (0%) |
| Primal, Animist, or Folk religion | 0 (0%) |
| Spiritism | 0 (0%) |
| Umbanda, Candomble, and other African-derived religions | 0 (0%) |
| Chinese folk/traditional religion | 0 (0%) |
| Some other religion | 1 (<0.1%) |
| No religion/Atheist/Agnostic | 0 (0%) |
| (Missing) | 4 (<0.1%) |
| **Relationship with mother growing up** |  |
| Very good | 6,238 (89%) |
| Somewhat good | 583 (8.3%) |
| Somewhat bad | 50 (0.7%) |
| Very bad | 26 (0.4%) |
| Does not apply | 68 (1.0%) |
| (Missing) | 27 (0.4%) |
| **Relationship with father growing up** |  |
| Very good | 6,067 (87%) |
| Somewhat good | 628 (9.0%) |
| Somewhat bad | 68 (1.0%) |
| Very bad | 52 (0.7%) |
| Does not apply | 115 (1.6%) |
| (Missing) | 61 (0.9%) |
| **Parent marital status at age 12** |  |
| Parents married | 5,557 (79%) |
| Divorced | 448 (6.4%) |
| Parents were never married | 47 (0.7%) |
| One or both parents had died | 735 (11%) |
| (Missing) | 205 (2.9%) |
| **Subjective financial status of family growing up** |  |
| Lived comfortably | 3,408 (49%) |
| Got by | 2,955 (42%) |
| Found it difficult | 439 (6.3%) |
| Found it very difficult | 181 (2.6%) |
| (Missing) | 9 (0.1%) |
| **Abuse** |  |
| Yes | 486 (6.9%) |
| No | 6,427 (92%) |
| (Missing) | 79 (1.1%) |
| **Outsider growing up** |  |
| Yes | 343 (4.9%) |
| No | 6,639 (95%) |
| (Missing) | 10 (0.1%) |
| **Self-rated health growing up** |  |
| Excellent | 1,246 (18%) |
| Very good | 1,968 (28%) |
| Good | 2,490 (36%) |
| Fair | 1,233 (18%) |
| Poor | 55 (0.8%) |
| (Missing) | 1 (<0.1%) |
| **Age 12 religious service attendance** |  |
| At least 1/week | 5,363 (77%) |
| 1-3/month | 973 (14%) |
| <1/month | 329 (4.7%) |
| Never | 275 (3.9%) |
| (Missing) | 51 (0.7%) |
| **Religious affiliation at age 12** |  |
| Christianity | 528 (7.6%) |
| Islam | 6,373 (91%) |
| Hinduism | 75 (1.1%) |
| Buddhism | 5 (<0.1%) |
| Judaism | 0 (0%) |
| Sikhism | 0 (0%) |
| Baha'i | 0 (0%) |
| Jainism | 1 (<0.1%) |
| Shinto | 0 (0%) |
| Taoism | 0 (<0.1%) |
| Confucianism | 1 (<0.1%) |
| Primal, Animist, or Folk religion | 1 (<0.1%) |
| Spiritism | 0 (0%) |
| Umbanda, Candomble, and other African-derived religions | 0 (0%) |
| Chinese folk/traditional religion | 0 (0%) |
| Some other religion | 0 (0%) |
| No religion/Atheist/Agnostic | 2 (<0.1%) |
| (Missing) | 8 (0.1%) |
| 1n (%) | |

Table S9b. Means by demographic category for Indonesia

|  | | Life Evaluation | | | | Life Satisfaction | | | | Happiness | | | |
| --- | --- | --- | --- | --- | --- | --- | --- | --- | --- | --- | --- | --- | --- |
| Variable | Category | Mean | 95% CI | SE | Global p-value | Mean | 95% CI | SE | Global p-value | Mean | 95% CI | SE | Global p-value |
| Age group | 18-24 | 7.06 | (6.90,7.23) | 0.08 | 0.137 | 7.85 | (7.69,8.01) | 0.08 | 0.022 | 8.02 | (7.87,8.16) | 0.07 | 0.483 |
|  | 25-29 | 7.11 | (6.92,7.30) | 0.10 |  | 8.17 | (8.01,8.33) | 0.08 |  | 8.17 | (8.00,8.34) | 0.09 |  |
|  | 30-39 | 6.96 | (6.80,7.12) | 0.08 |  | 8.10 | (7.95,8.26) | 0.08 |  | 8.12 | (7.98,8.26) | 0.07 |  |
|  | 40-49 | 6.78 | (6.60,6.95) | 0.09 |  | 7.98 | (7.82,8.14) | 0.08 |  | 8.06 | (7.90,8.21) | 0.08 |  |
|  | 50-59 | 6.97 | (6.73,7.21) | 0.12 |  | 7.89 | (7.71,8.08) | 0.09 |  | 7.89 | (7.71,8.08) | 0.09 |  |
|  | 60-69 | 7.14 | (6.78,7.50) | 0.18 |  | 8.04 | (7.74,8.35) | 0.16 |  | 7.99 | (7.63,8.35) | 0.18 |  |
|  | 70-79 | 6.98 | (6.01,7.94) | 0.48 |  | 7.73 | (7.09,8.38) | 0.32 |  | 7.82 | (7.03,8.62) | 0.40 |  |
|  | 80 or older | 5.84 | (3.51,8.18) | 0.98 |  | 5.74 | (2.93,8.54) | 1.18 |  | 7.41 | (5.72,9.10) | 0.71 |  |
| Gender | Male | 6.75 | (6.61,6.88) | 0.07 | < .001 | 7.89 | (7.77,8.02) | 0.06 | < .001 | 7.93 | (7.82,8.04) | 0.06 | 0.001 |
|  | Female | 7.19 | (7.08,7.31) | 0.06 |  | 8.09 | (8.00,8.18) | 0.05 |  | 8.16 | (8.07,8.25) | 0.05 |  |
|  | Other | 3.43 | (0.00,8.03) | 1.25 |  | 6.06 | (3.58,8.53) | 0.65 |  | 4.84 | (0.00,10.0***ǂ***) | 1.88 |  |
| Marital status | Married | 7.00 | (6.89,7.11) | 0.06 | 0.500 | 8.09 | (8.00,8.18) | 0.05 | < .001 | 8.14 | (8.06,8.22) | 0.04 | < .001 |
|  | Separated | 6.24 | (5.27,7.20) | 0.48 |  | 7.35 | (6.47,8.24) | 0.45 |  | 7.20 | (6.30,8.10) | 0.45 |  |
|  | Divorced | 6.60 | (6.06,7.13) | 0.27 |  | 7.43 | (6.87,8.00) | 0.29 |  | 7.16 | (6.56,7.75) | 0.30 |  |
|  | Widowed | 7.00 | (6.67,7.32) | 0.17 |  | 7.94 | (7.65,8.23) | 0.15 |  | 8.02 | (7.75,8.28) | 0.14 |  |
|  | Never | 6.95 | (6.79,7.11) | 0.08 |  | 7.78 | (7.63,7.94) | 0.08 |  | 7.88 | (7.74,8.03) | 0.08 |  |
|  | Domestic Partner | 7.05 | (5.74,8.36) | 0.58 |  | 7.56 | (6.24,8.89) | 0.59 |  | 8.28 | (7.31,9.24) | 0.43 |  |
| Employment | Employed for an employer | 6.89 | (6.71,7.08) | 0.10 | 0.002 | 7.82 | (7.63,8.01) | 0.10 | < .001 | 7.92 | (7.75,8.09) | 0.09 | < .001 |
|  | Self-employed | 7.00 | (6.86,7.14) | 0.07 |  | 8.09 | (7.97,8.22) | 0.06 |  | 8.08 | (7.96,8.21) | 0.06 |  |
|  | Retired | 7.39 | (6.93,7.85) | 0.23 |  | 8.45 | (8.07,8.82) | 0.19 |  | 7.91 | (7.47,8.36) | 0.22 |  |
|  | Student | 6.92 | (6.56,7.28) | 0.18 |  | 7.72 | (7.45,8.00) | 0.14 |  | 7.74 | (7.46,8.02) | 0.14 |  |
|  | Homemaker | 7.13 | (6.98,7.27) | 0.07 |  | 8.17 | (8.05,8.28) | 0.06 |  | 8.28 | (8.16,8.40) | 0.06 |  |
|  | Unemployed and looking for a job | 6.41 | (6.07,6.75) | 0.17 |  | 7.46 | (7.15,7.78) | 0.16 |  | 7.51 | (7.17,7.85) | 0.17 |  |
|  | None of these/Other | 6.89 | (6.52,7.26) | 0.19 |  | 7.87 | (7.56,8.18) | 0.16 |  | 7.91 | (7.66,8.17) | 0.13 |  |
| Religious service attendance | More than 1/week | 7.05 | (6.90,7.20) | 0.07 | 0.284 | 8.10 | (7.98,8.21) | 0.06 | 0.002 | 8.13 | (8.00,8.25) | 0.06 | 0.134 |
|  | 1/week | 6.91 | (6.77,7.04) | 0.07 |  | 8.03 | (7.90,8.16) | 0.07 |  | 8.04 | (7.91,8.17) | 0.07 |  |
|  | 1-3/month | 7.05 | (6.85,7.26) | 0.11 |  | 7.82 | (7.63,8.01) | 0.10 |  | 7.96 | (7.76,8.16) | 0.10 |  |
|  | A few times a year | 6.84 | (6.64,7.04) | 0.10 |  | 7.64 | (7.42,7.86) | 0.11 |  | 7.85 | (7.68,8.03) | 0.09 |  |
|  | Never | 6.84 | (6.47,7.22) | 0.19 |  | 7.96 | (7.63,8.29) | 0.17 |  | 7.93 | (7.58,8.28) | 0.18 |  |
| Education | Up to 8 years | 6.94 | (6.77,7.11) | 0.09 | 0.762 | 8.06 | (7.92,8.20) | 0.07 | 0.289 | 8.12 | (7.98,8.25) | 0.07 | 0.168 |
|  | 9-15 years | 6.99 | (6.88,7.09) | 0.05 |  | 7.93 | (7.85,8.02) | 0.04 |  | 7.99 | (7.91,8.06) | 0.04 |  |
|  | 16+ years | 7.03 | (6.85,7.21) | 0.09 |  | 7.98 | (7.82,8.14) | 0.08 |  | 7.93 | (7.76,8.10) | 0.09 |  |
| Immigration status | Born in this country | 6.97 | (6.88,7.06) | 0.05 | 0.403 | 7.99 | (7.91,8.07) | 0.04 | 0.157 | 8.04 | (7.97,8.12) | 0.04 | 0.656 |
|  | Born in another country | 6.56 | (5.55,7.56) | 0.49 |  | 7.38 | (6.46,8.30) | 0.45 |  | 7.90 | (6.89,8.91) | 0.49 |  |
| Religious affiliation | Christianity | 7.15 | (6.73,7.58) | 0.22 | < .001 | 7.77 | (7.45,8.09) | 0.16 | < .001 | 8.06 | (7.76,8.37) | 0.16 | < .001 |
|  | Islam | 6.97 | (6.87,7.06) | 0.05 |  | 8.02 | (7.93,8.10) | 0.04 |  | 8.04 | (7.97,8.12) | 0.04 |  |
|  | Hinduism | 5.87 | (4.54,7.20) | 0.67 |  | 7.08 | (6.01,8.16) | 0.54 |  | 7.89 | (7.37,8.41) | 0.26 |  |
|  | Buddhism | 5.00 | * | * |  | 5.00 | * | * |  | 6.50 | * | * |  |
|  | Taoism | 5.00 | * | * |  | 9.00 | * | * |  | 6.00 | * | * |  |
|  | Some other religion | 7.00 | * | * |  | 7.00 | * | * |  | 7.00 | * | * |  |
| Race/Ethnicity | Banjar/Melayu Banjar | 6.90 | (6.40,7.40) | 0.25 | < .001 | 8.00 | (7.63,8.37) | 0.19 | 0.110 | 8.21 | (7.91,8.51) | 0.15 | 0.017 |
|  | Betawi | 7.35 | (6.98,7.73) | 0.19 |  | 8.21 | (7.92,8.50) | 0.15 |  | 8.16 | (7.83,8.49) | 0.17 |  |
|  | Bugis | 7.42 | (6.98,7.87) | 0.23 |  | 8.21 | (7.79,8.62) | 0.21 |  | 8.37 | (8.03,8.71) | 0.17 |  |
|  | Jawa | 6.87 | (6.72,7.01) | 0.07 |  | 7.97 | (7.84,8.09) | 0.06 |  | 7.92 | (7.80,8.03) | 0.06 |  |
|  | Madura | 7.16 | (6.72,7.59) | 0.22 |  | 8.22 | (7.79,8.64) | 0.22 |  | 8.05 | (7.72,8.39) | 0.17 |  |
|  | Minangkabau | 6.80 | (6.30,7.29) | 0.25 |  | 7.62 | (7.16,8.07) | 0.23 |  | 8.05 | (7.61,8.49) | 0.22 |  |
|  | Sunda/Parahyangan | 6.92 | (6.68,7.16) | 0.12 |  | 7.93 | (7.74,8.13) | 0.10 |  | 8.01 | (7.81,8.21) | 0.10 |  |
|  | Bali | 5.84 | (4.42,7.26) | 0.71 |  | 7.08 | (5.96,8.20) | 0.56 |  | 7.93 | (7.44,8.43) | 0.25 |  |
|  | Batak | 6.91 | (6.52,7.29) | 0.19 |  | 7.84 | (7.55,8.13) | 0.15 |  | 7.72 | (7.31,8.13) | 0.21 |  |
|  | Makasar | 7.74 | (7.40,8.08) | 0.17 |  | 8.38 | (7.93,8.83) | 0.23 |  | 8.58 | (8.14,9.02) | 0.22 |  |
|  | Other | 7.11 | (6.88,7.33) | 0.11 |  | 8.08 | (7.89,8.28) | 0.10 |  | 8.23 | (8.07,8.40) | 0.08 |  |

Table S9c. Childhood predictors regression analysis results for Indonesia

|  | | Life Evaluation | | | | Life Satisfaction | | | | Happiness | | | |
| --- | --- | --- | --- | --- | --- | --- | --- | --- | --- | --- | --- | --- | --- |
| Variable | Category | Est | 95% CI | SE | Global p-value | Est | 95% CI | SE | Global p-value | Est | 95% CI | SE | Global p-value |
| Relationship with mother | (Ref: Very bad/somewhat bad) |  |  |  | 0.163 |  |  |  | 0.060 |  |  |  | 0.023 |
|  | Very good/somewhat good | 0.42 | (-0.19, 1.03) | 0.31 |  | 0.74 | (-0.03, 1.51) | 0.39 |  | 0.87 | (0.10, 1.64) | 0.39 |  |
| Relationship with father | (Ref: Very bad/somewhat bad) |  |  |  | 0.928 |  |  |  | 0.822 |  |  |  | 0.788 |
|  | Very good/somewhat good | 0.01 | (-0.56, 0.57) | 0.29 |  | 0.05 | (-0.43, 0.54) | 0.25 |  | -0.05 | (-0.54, 0.44) | 0.25 |  |
| Parent marital status | (Ref: Parents married) |  |  |  | 0.213 |  |  |  | 0.484 |  |  |  | 0.941 |
|  | Divorced | -0.30 | (-0.64, 0.04) | 0.17 |  | -0.11 | (-0.46, 0.25) | 0.18 |  | 0.04 | (-0.28, 0.37) | 0.17 |  |
|  | Parents were never married | -0.15 | (-1.12, 0.81) | 0.49 |  | 0.50 | (-0.45, 1.46) | 0.48 |  | 0.08 | (-0.70, 0.86) | 0.40 |  |
|  | One or both parents had died | -0.22 | (-0.54, 0.10) | 0.16 |  | 0.08 | (-0.18, 0.34) | 0.13 |  | 0.07 | (-0.21, 0.34) | 0.14 |  |
| Subjective financial status of family growing up | (Ref: Got by) |  |  |  | <.001 |  |  |  | <.001 |  |  |  | <.001 |
|  | Lived comfortably | 0.50 | (0.35, 0.65) | 0.08 |  | 0.44 | (0.30, 0.58) | 0.07 |  | 0.35 | (0.21, 0.49) | 0.07 |  |
|  | Found it difficult | -0.45 | (-0.82, -0.08) | 0.19 |  | -0.19 | (-0.56, 0.18) | 0.19 |  | -0.44 | (-0.80, -0.08) | 0.18 |  |
|  | Found it very difficult | -0.60 | (-1.25, 0.04) | 0.33 |  | -0.30 | (-0.90, 0.31) | 0.31 |  | -0.58 | (-1.17, 0.01) | 0.30 |  |
| Abuse | (Ref: No) |  |  |  | <.001 |  |  |  | 0.001 |  |  |  | <.001 |
|  | Yes | -0.60 | (-0.96, -0.25) | 0.18 |  | -0.64 | (-1.02, -0.25) | 0.20 |  | -0.64 | (-1.01, -0.28) | 0.19 |  |
| Outsider growing up | (Ref: No) |  |  |  | 0.848 |  |  |  | 0.153 |  |  |  | 0.049 |
|  | Yes | -0.03 | (-0.45, 0.39) | 0.22 |  | -0.32 | (-0.75, 0.12) | 0.22 |  | -0.41 | (-0.83, -0.00) | 0.21 |  |
| Self-rated health growing up | (Ref: Good) |  |  |  | 0.095 |  |  |  | 0.002 |  |  |  | <.001 |
|  | Excellent | 0.18 | (-0.07, 0.44) | 0.13 |  | 0.27 | (0.06, 0.49) | 0.11 |  | 0.33 | (0.16, 0.51) | 0.09 |  |
|  | Very good | -0.02 | (-0.21, 0.17) | 0.10 |  | 0.06 | (-0.09, 0.22) | 0.08 |  | 0.12 | (-0.04, 0.28) | 0.08 |  |
|  | Fair | -0.18 | (-0.40, 0.04) | 0.11 |  | -0.23 | (-0.43, -0.03) | 0.10 |  | -0.15 | (-0.34, 0.05) | 0.10 |  |
|  | Poor | -0.19 | (-1.37, 1.00) | 0.60 |  | -0.49 | (-1.76, 0.78) | 0.65 |  | -0.28 | (-1.43, 0.86) | 0.58 |  |
| Immigration status | (Ref: Born in this country) |  |  |  | 0.461 |  |  |  | 0.238 |  |  |  | 0.867 |
|  | Born in another country | -0.39 | (-1.42, 0.64) | 0.53 |  | -0.55 | (-1.57, 0.48) | 0.52 |  | -0.06 | (-0.95, 0.82) | 0.45 |  |
| Age 12 religious service attendance | (Ref: Never) |  |  |  | 0.591 |  |  |  | 0.297 |  |  |  | 0.154 |
|  | At least 1/week | -0.24 | (-0.59, 0.12) | 0.18 |  | -0.19 | (-0.50, 0.12) | 0.16 |  | 0.47 | (-0.03, 0.96) | 0.25 |  |
|  | 1-3/month | -0.20 | (-0.62, 0.22) | 0.21 |  | -0.33 | (-0.68, 0.03) | 0.18 |  | 0.53 | (-0.03, 1.10) | 0.29 |  |
|  | < 1/month | -0.21 | (-0.66, 0.24) | 0.23 |  | -0.17 | (-0.65, 0.30) | 0.24 |  | 0.27 | (-0.28, 0.83) | 0.28 |  |
| Year of birth | (Ref: 1998-2005; current age: 18-24) |  |  |  | 0.231 |  |  |  | 0.014 |  |  |  | 0.701 |
|  | 1993-1998; age 25-29 | 0.05 | (-0.19, 0.30) | 0.12 |  | 0.32 | (0.12, 0.53) | 0.10 |  | 0.16 | (-0.06, 0.38) | 0.11 |  |
|  | 1983-1993; age 30-39 | -0.01 | (-0.21, 0.19) | 0.10 |  | 0.33 | (0.12, 0.54) | 0.11 |  | 0.18 | (-0.02, 0.37) | 0.10 |  |
|  | 1973-1983; age 40-49 | -0.14 | (-0.36, 0.08) | 0.11 |  | 0.24 | (0.01, 0.46) | 0.11 |  | 0.16 | (-0.05, 0.36) | 0.10 |  |
|  | 1963-1973; age 50-59 | 0.14 | (-0.14, 0.43) | 0.15 |  | 0.21 | (-0.03, 0.45) | 0.12 |  | 0.07 | (-0.17, 0.31) | 0.12 |  |
|  | 1953-1963; age 60-69 | 0.37 | (-0.03, 0.78) | 0.21 |  | 0.40 | (0.05, 0.75) | 0.18 |  | 0.21 | (-0.17, 0.60) | 0.20 |  |
|  | 1943-1953; age 70-79 | 0.06 | (-0.92, 1.04) | 0.50 |  | 0.01 | (-0.59, 0.61) | 0.30 |  | -0.03 | (-0.80, 0.74) | 0.39 |  |
|  | 1943 or earlier; age 80+ | -0.46 | (-2.42, 1.51) | 1.00 |  | -1.67 | (-3.94, 0.60) | 1.16 |  | 0.07 | (-1.33, 1.47) | 0.71 |  |
| Gender | (Ref: Male) |  |  |  | <.001 |  |  |  | 0.002 |  |  |  | 0.003 |
|  | Female | 0.40 | (0.24, 0.56) | 0.08 |  | 0.16 | (0.03, 0.30) | 0.07 |  | 0.20 | (0.06, 0.33) | 0.07 |  |
|  | Other | -3.46 | (-5.92, -1.01) | 1.25 |  | -1.78 | (-3.24, -0.32) | 0.74 |  | -3.25 | (-6.97, 0.46) | 1.90 |  |
| Religious affiliation | (Ref: Islam) |  |  |  | 0.205 |  |  |  | 0.150 |  |  |  | 0.828 |
|  | Christianity | 0.15 | (-0.25, 0.56) | 0.21 |  | -0.17 | (-0.46, 0.13) | 0.15 |  | 0.03 | (-0.24, 0.29) | 0.13 |  |
|  | Collapsed affiliations with prevalence<3% | -1.13 | (-2.42, 0.16) | 0.66 |  | -0.75 | (-1.74, 0.23) | 0.50 |  | -0.16 | (-0.71, 0.39) | 0.28 |  |
| Race/ethnicity | (Ref: Plurality group) |  |  |  | 0.155 |  |  |  | 0.574 |  |  |  | 0.025 |
|  | Non-plurality groups | 0.13 | (-0.07, 0.32) | 0.10 |  | 0.04 | (-0.12, 0.20) | 0.08 |  | 0.16 | (0.01, 0.31) | 0.07 |  |

Table S9d. Sensitivity to unmeasured confounding of childhood predictors in Indonesia

|  | | Life Evaluation | | Life Satisfaction | | Happiness | |
| --- | --- | --- | --- | --- | --- | --- | --- |
| Variable | Category | E-value for Estimate | E-value for 95% CI | E-value for Estimate | E-value for 95% CI | E-value for Estimate | E-value for 95% CI |
| Relationship with mother | (Ref: Very bad/somewhat bad) |  |  |  |  |  |  |
|  | Very good/somewhat good | 1.60 | 1.00 | 2.02 | 1.00 | 2.22 | 1.25 |
| Relationship with father | (Ref: Very bad/somewhat bad) |  |  |  |  |  |  |
|  | Very good/somewhat good | 1.04 | 1.00 | 1.17 | 1.00 | 1.17 | 1.00 |
| Parent marital status | (Ref: Parents married) |  |  |  |  |  |  |
|  | Divorced | 1.47 | 1.00 | 1.26 | 1.00 | 1.15 | 1.00 |
|  | Parents were never married | 1.30 | 1.00 | 1.74 | 1.00 | 1.21 | 1.00 |
|  | One or both parents had died | 1.38 | 1.00 | 1.22 | 1.00 | 1.20 | 1.00 |
| Subjective financial status of family growing up | (Ref: Got by) |  |  |  |  |  |  |
|  | Lived comfortably | 1.68 | 1.52 | 1.67 | 1.51 | 1.58 | 1.41 |
|  | Found it difficult | 1.63 | 1.21 | 1.38 | 1.00 | 1.69 | 1.22 |
|  | Found it very difficult | 1.79 | 1.00 | 1.50 | 1.00 | 1.86 | 1.00 |
| Abuse | (Ref: No) |  |  |  |  |  |  |
|  | Yes | 1.79 | 1.41 | 1.90 | 1.44 | 1.94 | 1.50 |
| Outsider growing up | (Ref: No) |  |  |  |  |  |  |
|  | Yes | 1.12 | 1.00 | 1.53 | 1.00 | 1.66 | 1.03 |
| Self-rated health growing up | (Ref: Good) |  |  |  |  |  |  |
|  | Excellent | 1.34 | 1.00 | 1.47 | 1.18 | 1.56 | 1.34 |
|  | Very good | 1.08 | 1.00 | 1.19 | 1.00 | 1.28 | 1.00 |
|  | Fair | 1.33 | 1.00 | 1.42 | 1.13 | 1.32 | 1.00 |
|  | Poor | 1.34 | 1.00 | 1.72 | 1.00 | 1.50 | 1.00 |
| Immigration status | (Ref: Born in this country) |  |  |  |  |  |  |
|  | Born in another country | 1.56 | 1.00 | 1.79 | 1.00 | 1.19 | 1.00 |
| Age 12 religious service attendance | (Ref: Never) |  |  |  |  |  |  |
|  | At least 1/week | 1.40 | 1.00 | 1.37 | 1.00 | 1.72 | 1.00 |
|  | 1-3/month | 1.36 | 1.00 | 1.54 | 1.00 | 1.80 | 1.00 |
|  | < 1/month | 1.37 | 1.00 | 1.34 | 1.00 | 1.49 | 1.00 |
| Year of birth | (Ref: 1998-2005; current age: 18-24) |  |  |  |  |  |  |
|  | 1993-1998; age 25-29 | 1.16 | 1.00 | 1.53 | 1.28 | 1.33 | 1.00 |
|  | 1983-1993; age 30-39 | 1.06 | 1.00 | 1.54 | 1.28 | 1.36 | 1.00 |
|  | 1973-1983; age 40-49 | 1.28 | 1.00 | 1.43 | 1.08 | 1.33 | 1.00 |
|  | 1963-1973; age 50-59 | 1.29 | 1.00 | 1.40 | 1.00 | 1.21 | 1.00 |
|  | 1953-1963; age 60-69 | 1.55 | 1.00 | 1.62 | 1.16 | 1.41 | 1.00 |
|  | 1943-1953; age 70-79 | 1.17 | 1.00 | 1.07 | 1.00 | 1.13 | 1.00 |
|  | 1943 or earlier; age 80+ | 1.64 | 1.00 | 3.30 | 1.00 | 1.21 | 1.00 |
| Gender | (Ref: Male) |  |  |  |  |  |  |
|  | Female | 1.58 | 1.40 | 1.33 | 1.11 | 1.39 | 1.19 |
|  | Other | 6.43 | 2.23 | 3.48 | 1.53 | 7.18 | 1.00 |
| Religious affiliation | (Ref: Islam) |  |  |  |  |  |  |
|  | Christianity | 1.30 | 1.00 | 1.34 | 1.00 | 1.12 | 1.00 |
|  | Collapsed affiliations with prevalence<3% | 2.37 | 1.00 | 2.04 | 1.00 | 1.34 | 1.00 |
| Race/ethnicity | (Ref: Plurality group) |  |  |  |  |  |  |
|  | Non-plurality groups | 1.27 | 1.00 | 1.15 | 1.00 | 1.34 | 1.08 |

Table S9e. Complete-case supplemental analysis of means by demographic category for Indonesia

|  | | Life Evaluation | | | | Life Satisfaction | | | | Happiness | | | |
| --- | --- | --- | --- | --- | --- | --- | --- | --- | --- | --- | --- | --- | --- |
| Variable | Category | Mean | 95% CI | SE | Global p-value | Mean | 95% CI | SE | Global p-value | Mean | 95% CI | SE | Global p-value |
| Age group | 18-24 | 7.12 | (6.95,7.28) | 0.08 | 0.181 | 8.02 | (7.87,8.16) | 0.07 | 0.010 | 8.09 | (7.95,8.24) | 0.07 | 0.201 |
|  | 25-29 | 7.23 | (7.06,7.40) | 0.09 |  | 8.28 | (8.14,8.43) | 0.07 |  | 8.28 | (8.14,8.43) | 0.08 |  |
|  | 30-39 | 7.07 | (6.92,7.22) | 0.08 |  | 8.28 | (8.16,8.40) | 0.06 |  | 8.20 | (8.08,8.33) | 0.06 |  |
|  | 40-49 | 6.96 | (6.79,7.13) | 0.09 |  | 8.15 | (8.02,8.29) | 0.07 |  | 8.27 | (8.14,8.40) | 0.07 |  |
|  | 50-59 | 7.11 | (6.89,7.34) | 0.11 |  | 8.11 | (7.95,8.27) | 0.08 |  | 8.03 | (7.86,8.19) | 0.08 |  |
|  | 60-69 | 7.39 | (7.10,7.69) | 0.15 |  | 8.30 | (8.05,8.55) | 0.13 |  | 8.20 | (7.92,8.49) | 0.15 |  |
|  | 70-79 | 7.03 | (6.09,7.96) | 0.47 |  | 7.73 | (7.09,8.38) | 0.32 |  | 7.82 | (7.03,8.62) | 0.40 |  |
|  | 80 or older | 5.84 | (3.51,8.18) | 0.98 |  | 5.74 | (2.93,8.54) | 1.18 |  | 7.41 | (5.72,9.10) | 0.71 |  |
| Gender | Female | 7.30 | (7.19,7.40) | 0.05 | < .001 | 8.23 | (8.14,8.31) | 0.04 | 0.001 | 8.28 | (8.19,8.36) | 0.04 | 0.001 |
|  | Male | 6.90 | (6.77,7.03) | 0.07 |  | 8.11 | (8.01,8.21) | 0.05 |  | 8.07 | (7.97,8.17) | 0.05 |  |
|  | Other | 3.39 | (0.00,8.28) | 1.26 |  | 6.08 | (3.53,8.64) | 0.66 |  | 4.75 | (0.00,12.01) | 1.87 |  |
| Marital status | Divorced | 6.68 | (6.16,7.21) | 0.27 | 0.377 | 7.97 | (7.55,8.40) | 0.22 | 0.026 | 7.79 | (7.33,8.25) | 0.23 | 0.006 |
|  | Domestic partner | 7.02 | (5.71,8.33) | 0.58 |  | 8.49 | (7.21,9.76) | 0.57 |  | 8.73 | (7.85,9.60) | 0.39 |  |
|  | Married | 7.14 | (7.04,7.24) | 0.05 |  | 8.24 | (8.16,8.32) | 0.04 |  | 8.24 | (8.17,8.32) | 0.04 |  |
|  | Separated | 6.37 | (5.36,7.39) | 0.51 |  | 8.00 | (7.33,8.67) | 0.34 |  | 7.88 | (7.18,8.58) | 0.35 |  |
|  | Single/Never been married | 7.04 | (6.88,7.19) | 0.08 |  | 7.99 | (7.85,8.13) | 0.07 |  | 8.00 | (7.86,8.14) | 0.07 |  |
|  | Widowed | 7.16 | (6.86,7.47) | 0.15 |  | 8.03 | (7.75,8.31) | 0.14 |  | 8.10 | (7.84,8.36) | 0.13 |  |
| Employment | Employed for an employer | 6.99 | (6.80,7.17) | 0.09 | 0.003 | 7.97 | (7.81,8.13) | 0.08 | < .001 | 8.04 | (7.89,8.18) | 0.07 | < .001 |
|  | Homemaker | 7.28 | (7.14,7.41) | 0.07 |  | 8.32 | (8.21,8.42) | 0.05 |  | 8.39 | (8.27,8.50) | 0.06 |  |
|  | None of these/Other | 7.02 | (6.68,7.36) | 0.17 |  | 8.18 | (7.93,8.43) | 0.13 |  | 8.10 | (7.88,8.32) | 0.11 |  |
|  | Retired | 7.42 | (7.02,7.82) | 0.20 |  | 8.45 | (8.10,8.81) | 0.18 |  | 7.97 | (7.54,8.41) | 0.22 |  |
|  | Self-employed | 7.11 | (6.98,7.25) | 0.07 |  | 8.24 | (8.13,8.35) | 0.06 |  | 8.19 | (8.08,8.30) | 0.06 |  |
|  | Student | 6.97 | (6.63,7.32) | 0.17 |  | 7.85 | (7.59,8.10) | 0.13 |  | 7.82 | (7.56,8.09) | 0.13 |  |
|  | Unemployed and looking for a job | 6.69 | (6.40,6.98) | 0.15 |  | 7.84 | (7.55,8.14) | 0.15 |  | 7.84 | (7.56,8.12) | 0.14 |  |
| Religious service attendance | A few times a year | 6.90 | (6.70,7.09) | 0.10 | 0.039 | 7.83 | (7.64,8.02) | 0.10 | < .001 | 7.89 | (7.71,8.07) | 0.09 | 0.006 |
|  | More than once a week | 7.22 | (7.08,7.36) | 0.07 |  | 8.27 | (8.17,8.37) | 0.05 |  | 8.28 | (8.18,8.39) | 0.05 |  |
|  | Never | 6.90 | (6.52,7.29) | 0.20 |  | 8.15 | (7.84,8.46) | 0.16 |  | 8.17 | (7.85,8.48) | 0.16 |  |
|  | Once a week | 7.03 | (6.90,7.16) | 0.07 |  | 8.20 | (8.09,8.32) | 0.06 |  | 8.16 | (8.04,8.28) | 0.06 |  |
|  | One to three times a month | 7.16 | (6.97,7.36) | 0.10 |  | 8.00 | (7.83,8.16) | 0.08 |  | 8.08 | (7.90,8.25) | 0.09 |  |
| Education | Up to 8 years | 7.13 | (6.97,7.28) | 0.08 | 0.745 | 8.27 | (8.16,8.39) | 0.06 | 0.015 | 8.32 | (8.19,8.44) | 0.06 | 0.001 |
|  | 16+ years | 7.03 | (6.85,7.21) | 0.09 |  | 8.02 | (7.86,8.17) | 0.08 |  | 7.96 | (7.80,8.12) | 0.08 |  |
|  | 9 to 15 years | 7.08 | (6.98,7.18) | 0.05 |  | 8.09 | (8.02,8.17) | 0.04 |  | 8.07 | (8.00,8.15) | 0.04 |  |
| Immigration status | Born in another country | 6.94 | (6.28,7.59) | 0.32 | 0.613 | 8.12 | (7.54,8.69) | 0.28 | 0.854 | 8.14 | (7.29,8.99) | 0.42 | 0.938 |
|  | Born in this country | 7.10 | (7.01,7.19) | 0.05 |  | 8.17 | (8.10,8.24) | 0.03 |  | 8.17 | (8.11,8.24) | 0.03 |  |
| Religious affiliation | Buddhism | 5.00 | * | * | < .001 | 5.00 | * | * | < .001 | 6.50 | * | * | < .001 |
|  | Christianity | 7.37 | (6.99,7.75) | 0.19 |  | 8.25 | (7.96,8.55) | 0.15 |  | 8.31 | (7.97,8.66) | 0.18 |  |
|  | Hinduism | 6.32 | (5.29,7.35) | 0.52 |  | 7.79 | (7.33,8.24) | 0.23 |  | 7.89 | (7.37,8.41) | 0.26 |  |
|  | Islam | 7.09 | (7.00,7.18) | 0.05 |  | 8.17 | (8.10,8.24) | 0.04 |  | 8.17 | (8.10,8.23) | 0.03 |  |
|  | Some other religion | 7.00 | * | * |  | 7.00 | * | * |  | 7.00 | * | * |  |
|  | Taoism | 5.00 | * | * |  | 9.00 | * | * |  | 6.00 | * | * |  |

Table S9f. Complete-case supplemental analysis of childhood predictors regression analysis results for Indonesia

|  | | Life Evaluation | | | | Life Satisfaction | | | | Happiness | | | |
| --- | --- | --- | --- | --- | --- | --- | --- | --- | --- | --- | --- | --- | --- |
| Variable | Category | Est | 95% CI | SE | Global p-value | Est | 95% CI | SE | Global p-value | Est | 95% CI | SE | Global p-value |
| Relationship with mother | (Ref: Very bad/somewhat bad) |  |  |  | 0.365 |  |  |  | 0.274 |  |  |  | 0.257 |
|  | Very good/somewhat good | 0.25 | (-0.30,0.81) | 0.28 |  | 0.34 | (-0.27,0.95) | 0.31 |  | 0.34 | (-0.25,0.92) | 0.30 |  |
| Relationship with father | (Ref: Very bad/somewhat bad) |  |  |  | 0.698 |  |  |  | 0.398 |  |  |  | 0.801 |
|  | Very good/somewhat good | 0.09 | (-0.38,0.56) | 0.24 |  | 0.19 | (-0.25,0.63) | 0.22 |  | 0.05 | (-0.35,0.45) | 0.20 |  |
| Parent marital status | (Ref: Parents married) |  |  |  | 0.193 |  |  |  | 0.332 |  |  |  | 0.501 |
|  | No, one or both of them had died | 0.13 | (-0.26,0.52) | 0.20 |  | 0.13 | (-0.21,0.46) | 0.17 |  | 0.17 | (-0.15,0.50) | 0.16 |  |
|  | No, they were never married | -0.32 | (-1.35,0.71) | 0.53 |  | 0.49 | (-0.17,1.14) | 0.33 |  | -0.16 | (-1.10,0.77) | 0.48 |  |
|  | Yes, married | 0.28 | (-0.04,0.59) | 0.16 |  | 0.01 | (-0.26,0.28) | 0.14 |  | 0.01 | (-0.26,0.27) | 0.13 |  |
| Subjective financial status of family growing up | (Ref: Got by) |  |  |  | <.001 |  |  |  | <.001 |  |  |  | <.001 |
|  | Found it difficult | -0.48 | (-0.80,-0.15) | 0.17 |  | -0.09 | (-0.40,0.22) | 0.16 |  | -0.35 | (-0.64,-0.05) | 0.15 |  |
|  | Found it very difficult | -0.81 | (-1.42,-0.20) | 0.31 |  | -0.22 | (-0.72,0.27) | 0.25 |  | -0.52 | (-1.04,-0.00) | 0.27 |  |
|  | Lived comfortably | 0.43 | (0.29,0.57) | 0.07 |  | 0.37 | (0.25,0.49) | 0.06 |  | 0.30 | (0.18,0.42) | 0.06 |  |
| Abuse | (Ref: No) |  |  |  | 0.003 |  |  |  | 0.004 |  |  |  | 0.063 |
|  | Yes | -0.45 | (-0.76,-0.15) | 0.15 |  | -0.42 | (-0.71,-0.14) | 0.15 |  | -0.25 | (-0.51,0.01) | 0.13 |  |
| Outsider growing up | (Ref: No) |  |  |  | 0.515 |  |  |  | 0.303 |  |  |  | 0.033 |
|  | Yes | 0.12 | (-0.25,0.49) | 0.19 |  | -0.17 | (-0.49,0.15) | 0.16 |  | -0.35 | (-0.67,-0.03) | 0.16 |  |
| Self-rated health growing up | (Ref: Good) |  |  |  | 0.165 |  |  |  | 0.003 |  |  |  | <.001 |
|  | Excellent | 0.27 | (0.03,0.51) | 0.12 |  | 0.29 | (0.10,0.48) | 0.10 |  | 0.32 | (0.15,0.48) | 0.08 |  |
|  | Fair | -0.03 | (-0.25,0.19) | 0.11 |  | -0.16 | (-0.34,0.02) | 0.09 |  | -0.11 | (-0.28,0.06) | 0.09 |  |
|  | Poor | 0.10 | (-1.03,1.23) | 0.57 |  | -0.24 | (-1.38,0.90) | 0.58 |  | 0.06 | (-0.87,0.99) | 0.47 |  |
|  | Very good | 0.09 | (-0.09,0.26) | 0.09 |  | 0.07 | (-0.07,0.21) | 0.07 |  | 0.12 | (-0.02,0.26) | 0.07 |  |
| Immigration status | (Ref: Born in this country) |  |  |  | 0.715 |  |  |  | 0.796 |  |  |  | 0.868 |
|  | Born in another country | -0.12 | (-0.79,0.54) | 0.34 |  | -0.08 | (-0.72,0.55) | 0.32 |  | -0.07 | (-0.86,0.72) | 0.40 |  |
| Age 12 religious service attendance | (Ref: Never) |  |  |  | 0.939 |  |  |  | 0.244 |  |  |  | 0.333 |
|  | At least once a week | -0.10 | (-0.45,0.26) | 0.18 |  | -0.17 | (-0.44,0.10) | 0.14 |  | 0.10 | (-0.26,0.46) | 0.18 |  |
|  | Less than once a month | -0.09 | (-0.54,0.36) | 0.23 |  | -0.12 | (-0.51,0.28) | 0.20 |  | -0.13 | (-0.56,0.31) | 0.22 |  |
|  | One to three times a month | -0.06 | (-0.47,0.34) | 0.21 |  | -0.29 | (-0.59,0.01) | 0.15 |  | 0.15 | (-0.26,0.56) | 0.21 |  |
| Year of birth | (Ref: 1998-2005; current age: 18-24) |  |  |  | 0.037 |  |  |  | <.001 |  |  |  | 0.144 |
|  | 1993-1998; age 25-29 | 0.11 | (-0.12,0.34) | 0.12 |  | 0.28 | (0.09,0.47) | 0.10 |  | 0.19 | (-0.01,0.39) | 0.10 |  |
|  | 1983-1993; age 30-39 | 0.04 | (-0.16,0.23) | 0.10 |  | 0.34 | (0.16,0.52) | 0.09 |  | 0.17 | (-0.01,0.35) | 0.09 |  |
|  | 1973-1983; age 40-49 | -0.02 | (-0.24,0.19) | 0.11 |  | 0.24 | (0.04,0.44) | 0.10 |  | 0.26 | (0.08,0.45) | 0.09 |  |
|  | 1963-1973; age 50-59 | 0.23 | (-0.03,0.50) | 0.14 |  | 0.25 | (0.03,0.47) | 0.11 |  | 0.10 | (-0.11,0.32) | 0.11 |  |
|  | 1953-1963; age 60-69 | 0.56 | (0.21,0.91) | 0.18 |  | 0.46 | (0.15,0.76) | 0.15 |  | 0.31 | (-0.02,0.64) | 0.17 |  |
|  | 1943-1953; age 70-79 | 0.03 | (-0.87,0.93) | 0.46 |  | -0.18 | (-0.79,0.43) | 0.31 |  | -0.13 | (-0.90,0.63) | 0.39 |  |
|  | 1943 or earlier; age 80+ | -0.44 | (-2.35,1.46) | 0.97 |  | -1.91 | (-4.14,0.31) | 1.13 |  | -0.04 | (-1.40,1.33) | 0.70 |  |
| Gender | (Ref: Male) |  |  |  | <.001 |  |  |  | 0.005 |  |  |  | 0.003 |
|  | Male | -0.36 | (-0.51,-0.22) | 0.08 |  | -0.09 | (-0.21,0.03) | 0.06 |  | -0.18 | (-0.31,-0.05) | 0.07 |  |
|  | Other | -3.95 | (-6.43,-1.47) | 1.27 |  | -2.08 | (-3.44,-0.71) | 0.70 |  | -3.49 | (-7.17,0.20) | 1.88 |  |
| Religious affiliation | (Ref: Islam) |  |  |  | 0.191 |  |  |  | 0.292 |  |  |  | 0.384 |
|  | Christianity | 0.18 | (-0.18,0.54) | 0.18 |  | 0.07 | (-0.22,0.35) | 0.15 |  | 0.10 | (-0.20,0.40) | 0.15 |  |
|  | Christianity | 0.18 | (-0.18,0.54) | 0.18 |  | 0.07 | (-0.22,0.35) | 0.15 |  | 0.10 | (-0.20,0.40) | 0.15 |  |
|  | Collapsed affiliations with prevalence<3% | -0.90 | (-1.99,0.18) | 0.55 |  | -0.37 | (-0.84,0.10) | 0.24 |  | -0.32 | (-0.83,0.20) | 0.26 |  |
| Race/ethnicity | (Ref: Plurality group) |  |  |  | 0.008 |  |  |  | 0.008 |  |  |  | <.001 |
|  | Non-plurality groups | 0.24 | (0.06,0.42) | 0.09 |  | 0.19 | (0.05,0.33) | 0.07 |  | 0.23 | (0.09,0.36) | 0.07 |  |

Table S9g. Complete-case supplemental analysis of sensitivity to unmeasured confounding of childhood predictors in Indonesia

|  | | Life Evaluation | | Life Satisfaction | | Happiness | |
| --- | --- | --- | --- | --- | --- | --- | --- |
| Variable | Category | E-value for Estimate | E-value for 95% CI | E-value for Estimate | E-value for 95% CI | E-value for Estimate | E-value for 95% CI |
| Relationship with mother | (Ref: Very bad/somewhat bad) |  |  |  |  |  |  |
|  | Very good/somewhat good | 1.44 | 1.00 | 1.62 | 1.00 | 1.62 | 1.00 |
| Relationship with father | (Ref: Very bad/somewhat bad) |  |  |  |  |  |  |
|  | Very good/somewhat good | 1.23 | 1.00 | 1.41 | 1.00 | 1.18 | 1.00 |
| Parent marital status | (Ref: Parents married) |  |  |  |  |  |  |
|  | No, one or both of them had died | 1.29 | 1.00 | 1.31 | 1.00 | 1.39 | 1.00 |
|  | No, they were never married | 1.52 | 1.00 | 1.81 | 1.00 | 1.37 | 1.00 |
|  | Yes, married | 1.46 | 1.00 | 1.07 | 1.00 | 1.06 | 1.00 |
| Subjective financial status of family growing up | (Ref: Got by) |  |  |  |  |  |  |
|  | Found it difficult | 1.70 | 1.32 | 1.25 | 1.00 | 1.63 | 1.18 |
|  | Found it very difficult | 2.07 | 1.37 | 1.45 | 1.00 | 1.86 | 1.03 |
|  | Lived comfortably | 1.64 | 1.48 | 1.65 | 1.49 | 1.56 | 1.39 |
| Abuse | (Ref: No) |  |  |  |  |  |  |
|  | Yes | 1.67 | 1.32 | 1.73 | 1.33 | 1.49 | 1.00 |
| Outsider growing up | (Ref: No) |  |  |  |  |  |  |
|  | Yes | 1.27 | 1.00 | 1.38 | 1.00 | 1.63 | 1.13 |
| Self-rated health growing up | (Ref: Good) |  |  |  |  |  |  |
|  | Excellent | 1.46 | 1.12 | 1.54 | 1.26 | 1.59 | 1.36 |
|  | Fair | 1.12 | 1.00 | 1.36 | 1.00 | 1.28 | 1.00 |
|  | Poor | 1.24 | 1.00 | 1.48 | 1.00 | 1.19 | 1.00 |
|  | Very good | 1.22 | 1.00 | 1.21 | 1.00 | 1.30 | 1.00 |
| Immigration status | (Ref: Born in this country) |  |  |  |  |  |  |
|  | Born in another country | 1.28 | 1.00 | 1.24 | 1.00 | 1.21 | 1.00 |
| Age 12 religious service attendance | (Ref: Never) |  |  |  |  |  |  |
|  | At least once a week | 1.24 | 1.00 | 1.38 | 1.00 | 1.27 | 1.00 |
|  | Less than once a month | 1.23 | 1.00 | 1.29 | 1.00 | 1.32 | 1.00 |
|  | One to three times a month | 1.19 | 1.00 | 1.54 | 1.00 | 1.35 | 1.00 |
| Year of birth | (Ref: 1998-2005; current age: 18-24) |  |  |  |  |  |  |
|  | 1993-1998; age 25-29 | 1.26 | 1.00 | 1.53 | 1.26 | 1.41 | 1.00 |
|  | 1983-1993; age 30-39 | 1.13 | 1.00 | 1.62 | 1.37 | 1.38 | 1.00 |
|  | 1973-1983; age 40-49 | 1.10 | 1.00 | 1.47 | 1.15 | 1.51 | 1.24 |
|  | 1963-1973; age 50-59 | 1.41 | 1.00 | 1.49 | 1.13 | 1.28 | 1.00 |
|  | 1953-1963; age 60-69 | 1.79 | 1.39 | 1.77 | 1.36 | 1.58 | 1.00 |
|  | 1943-1953; age 70-79 | 1.13 | 1.00 | 1.39 | 1.00 | 1.33 | 1.00 |
|  | 1943 or earlier; age 80+ | 1.66 | 1.00 | 4.26 | 1.00 | 1.15 | 1.00 |
| Gender | (Ref: Male) |  |  |  |  |  |  |
|  | Male | 1.57 | 1.39 | 1.26 | 1.00 | 1.40 | 1.19 |
|  | Other | 8.63 | 2.92 | 4.64 | 2.12 | 9.58 | 1.00 |
| Religious affiliation | (Ref: Islam) |  |  |  |  |  |  |
|  | Christianity | 1.35 | 1.00 | 1.21 | 1.00 | 1.27 | 1.00 |
|  | Christianity | 1.35 | 1.00 | 1.21 | 1.00 | 1.27 | 1.00 |
|  | Collapsed affiliations with prevalence<3% | 2.18 | 1.00 | 1.66 | 1.00 | 1.59 | 1.00 |
| Race/ethnicity | (Ref: Plurality group) |  |  |  |  |  |  |
|  | Non-plurality groups | 1.42 | 1.18 | 1.41 | 1.18 | 1.46 | 1.26 |

# Tables S10a-g: Israel

Table S10a. Nationally representative descriptive statistics for Israel

| **Characteristic** | **N = 3,669**1 |
| --- | --- |
| **Age group** |  |
| 1998-2005; age 18-24 | 553 (15%) |
| 1993-1998; age 25-29 | 407 (11%) |
| 1983-1993; age 30-39 | 666 (18%) |
| 1973-1983; age 40-49 | 616 (17%) |
| 1963-1973; age 50-59 | 542 (15%) |
| 1953-1963; age 60-69 | 469 (13%) |
| 1943-1953; age 70-79 | 336 (9.2%) |
| 1943 or earlier; age 80+ | 79 (2.2%) |
| (Missing) | 0 (0%) |
| **Gender** |  |
| Male | 1,791 (49%) |
| Female | 1,872 (51%) |
| Other | 0 (<0.1%) |
| (Missing) | 6 (0.2%) |
| **Race/Ethnicity** |  |
| Arab | 674 (18%) |
| Jewish | 2,926 (80%) |
| Other | 39 (1.1%) |
| (Missing) | 30 (0.8%) |
| **Respondent Marital status** |  |
| Married | 2,056 (56%) |
| Separated | 48 (1.3%) |
| Divorced | 258 (7.0%) |
| Widowed | 212 (5.8%) |
| Single, never married | 834 (23%) |
| Domestic Partner | 193 (5.3%) |
| (Missing) | 69 (1.9%) |
| **Employment** |  |
| Employed for an employer | 1,793 (49%) |
| Self-employed | 424 (12%) |
| Retired | 576 (16%) |
| Student | 388 (11%) |
| Homemaker | 211 (5.7%) |
| Unemployed and looking for a job | 148 (4.0%) |
| None of these/Other | 118 (3.2%) |
| (Missing) | 10 (0.3%) |
| **Religious service attendance as an adult (now)** |  |
| More than 1/week | 649 (18%) |
| 1/week | 495 (14%) |
| 1-3/month | 374 (10%) |
| A few times a year | 1,014 (28%) |
| Never | 1,122 (31%) |
| (Missing) | 14 (0.4%) |
| **Education (years)** |  |
| Up to 8 years | 224 (6.1%) |
| 9-15 years | 1,517 (41%) |
| 16+ years | 1,926 (52%) |
| (Missing) | 2 (<0.1%) |
| **Immigration status** |  |
| Born in this country | 2,796 (76%) |
| Born in another country | 868 (24%) |
| (Missing) | 5 (0.1%) |
| **Religious affiliation as an adult (now)** |  |
| Christianity | 39 (1.1%) |
| Islam | 656 (18%) |
| Hinduism | 0 (0%) |
| Buddhism | 0 (0%) |
| Judaism | 2,897 (79%) |
| Sikhism | 0 (0%) |
| Baha'i | 2 (<0.1%) |
| Jainism | 0 (0%) |
| Shinto | 0 (0%) |
| Taoism | 1 (<0.1%) |
| Confucianism | 0 (0%) |
| Primal, Animist, or Folk religion | 1 (<0.1%) |
| Spiritism | 0 (0%) |
| Umbanda, Candomble, and other African-derived religions | 0 (0%) |
| Chinese folk/traditional religion | 0 (0%) |
| Some other religion | 5 (0.1%) |
| No religion/Atheist/Agnostic | 64 (1.7%) |
| (Missing) | 4 (0.1%) |
| **Relationship with mother growing up** |  |
| Very good | 2,686 (73%) |
| Somewhat good | 793 (22%) |
| Somewhat bad | 110 (3.0%) |
| Very bad | 18 (0.5%) |
| Does not apply | 45 (1.2%) |
| (Missing) | 17 (0.5%) |
| **Relationship with father growing up** |  |
| Very good | 2,290 (62%) |
| Somewhat good | 912 (25%) |
| Somewhat bad | 234 (6.4%) |
| Very bad | 37 (1.0%) |
| Does not apply | 171 (4.7%) |
| (Missing) | 25 (0.7%) |
| **Parent marital status at age 12** |  |
| Parents married | 3,172 (86%) |
| Divorced | 284 (7.8%) |
| Parents were never married | 36 (1.0%) |
| One or both parents had died | 130 (3.5%) |
| (Missing) | 47 (1.3%) |
| **Subjective financial status of family growing up** |  |
| Lived comfortably | 923 (25%) |
| Got by | 1,822 (50%) |
| Found it difficult | 667 (18%) |
| Found it very difficult | 239 (6.5%) |
| (Missing) | 17 (0.5%) |
| **Abuse** |  |
| Yes | 0 (0%) |
| No | 0 (0%) |
| (Missing) | 3,669 (100%) |
| **Outsider growing up** |  |
| Yes | 371 (10%) |
| No | 3,228 (88%) |
| (Missing) | 70 (1.9%) |
| **Self-rated health growing up** |  |
| Excellent | 1,785 (49%) |
| Very good | 1,284 (35%) |
| Good | 480 (13%) |
| Fair | 105 (2.9%) |
| Poor | 6 (0.2%) |
| (Missing) | 8 (0.2%) |
| **Age 12 religious service attendance** |  |
| At least 1/week | 867 (24%) |
| 1-3/month | 435 (12%) |
| <1/month | 810 (22%) |
| Never | 1,539 (42%) |
| (Missing) | 17 (0.5%) |
| **Religious affiliation at age 12** |  |
| Christianity | 60 (1.6%) |
| Islam | 647 (18%) |
| Hinduism | 0 (0%) |
| Buddhism | 0 (0%) |
| Judaism | 2,873 (78%) |
| Sikhism | 1 (<0.1%) |
| Baha'i | 1 (<0.1%) |
| Jainism | 0 (0%) |
| Shinto | 0 (0%) |
| Taoism | 0 (0%) |
| Confucianism | 0 (0%) |
| Primal, Animist, or Folk religion | 3 (<0.1%) |
| Spiritism | 0 (0%) |
| Umbanda, Candomble, and other African-derived religions | 0 (0%) |
| Chinese folk/traditional religion | 0 (0%) |
| Some other religion | 5 (0.1%) |
| No religion/Atheist/Agnostic | 69 (1.9%) |
| (Missing) | 10 (0.3%) |
| 1n (%) | |

Table S10b. Means by demographic category for Israel

|  | | Life Evaluation | | | | Life Satisfaction | | | | Happiness | | | |
| --- | --- | --- | --- | --- | --- | --- | --- | --- | --- | --- | --- | --- | --- |
| Variable | Category | Mean | 95% CI | SE | Global p-value | Mean | 95% CI | SE | Global p-value | Mean | 95% CI | SE | Global p-value |
| Age group | 18-24 | 7.71 | (7.46,7.97) | 0.13 | < .001 | 8.01 | (7.79,8.22) | 0.11 | < .001 | 8.08 | (7.85,8.32) | 0.12 | < .001 |
|  | 25-29 | 7.56 | (7.35,7.77) | 0.11 |  | 7.92 | (7.70,8.15) | 0.11 |  | 7.94 | (7.73,8.15) | 0.11 |  |
|  | 30-39 | 7.44 | (7.23,7.65) | 0.11 |  | 7.47 | (7.24,7.70) | 0.12 |  | 7.80 | (7.61,7.98) | 0.09 |  |
|  | 40-49 | 7.31 | (7.11,7.52) | 0.11 |  | 7.37 | (7.13,7.61) | 0.12 |  | 7.81 | (7.63,7.99) | 0.09 |  |
|  | 50-59 | 7.25 | (7.03,7.47) | 0.11 |  | 7.21 | (6.94,7.47) | 0.13 |  | 7.63 | (7.44,7.82) | 0.10 |  |
|  | 60-69 | 7.33 | (7.11,7.55) | 0.11 |  | 7.53 | (7.31,7.75) | 0.11 |  | 7.76 | (7.57,7.94) | 0.09 |  |
|  | 70-79 | 6.67 | (6.35,6.98) | 0.16 |  | 6.76 | (6.38,7.14) | 0.19 |  | 7.24 | (7.01,7.48) | 0.12 |  |
|  | 80 or older | 6.09 | (5.54,6.64) | 0.28 |  | 6.76 | (6.05,7.48) | 0.36 |  | 6.97 | (6.46,7.49) | 0.26 |  |
| Gender | Male | 7.47 | (7.31,7.62) | 0.08 | < .001 | 7.56 | (7.39,7.72) | 0.08 | < .001 | 7.84 | (7.71,7.98) | 0.07 | < .001 |
|  | Female | 7.20 | (7.04,7.37) | 0.08 |  | 7.39 | (7.20,7.59) | 0.10 |  | 7.68 | (7.55,7.81) | 0.07 |  |
|  | Other | 9.00 | * | * |  | 7.00 | * | * |  | 7.00 | * | * |  |
| Marital status | Married | 7.52 | (7.36,7.67) | 0.08 | < .001 | 7.65 | (7.47,7.84) | 0.09 | < .001 | 7.98 | (7.86,8.10) | 0.06 | < .001 |
|  | Separated | 6.61 | (6.03,7.19) | 0.29 |  | 6.88 | (6.31,7.46) | 0.29 |  | 7.08 | (6.63,7.53) | 0.22 |  |
|  | Divorced | 6.63 | (6.31,6.95) | 0.16 |  | 6.43 | (6.03,6.82) | 0.20 |  | 6.97 | (6.68,7.27) | 0.15 |  |
|  | Widowed | 6.50 | (6.17,6.84) | 0.17 |  | 6.88 | (6.51,7.26) | 0.19 |  | 6.89 | (6.58,7.20) | 0.16 |  |
|  | Never | 7.46 | (7.26,7.66) | 0.10 |  | 7.69 | (7.50,7.88) | 0.10 |  | 7.74 | (7.54,7.93) | 0.10 |  |
|  | Domestic Partner | 6.85 | (6.43,7.26) | 0.21 |  | 6.81 | (6.41,7.20) | 0.20 |  | 7.71 | (7.45,7.96) | 0.13 |  |
| Employment | Employed for an employer | 7.46 | (7.31,7.60) | 0.07 | < .001 | 7.54 | (7.37,7.71) | 0.09 | < .001 | 7.84 | (7.71,7.96) | 0.06 | < .001 |
|  | Self-employed | 7.39 | (7.12,7.65) | 0.13 |  | 7.29 | (6.96,7.61) | 0.16 |  | 7.82 | (7.54,8.11) | 0.14 |  |
|  | Retired | 6.79 | (6.51,7.07) | 0.14 |  | 7.03 | (6.69,7.36) | 0.17 |  | 7.39 | (7.17,7.61) | 0.11 |  |
|  | Student | 7.89 | (7.59,8.20) | 0.15 |  | 8.19 | (7.91,8.47) | 0.14 |  | 8.24 | (7.94,8.54) | 0.15 |  |
|  | Homemaker | 6.94 | (6.68,7.20) | 0.13 |  | 7.51 | (7.10,7.92) | 0.21 |  | 7.37 | (7.07,7.66) | 0.15 |  |
|  | Unemployed and looking for a job | 6.60 | (6.17,7.04) | 0.22 |  | 6.80 | (6.39,7.22) | 0.21 |  | 6.99 | (6.52,7.45) | 0.23 |  |
|  | None of these/Other | 7.65 | (7.31,7.99) | 0.17 |  | 7.74 | (7.37,8.11) | 0.19 |  | 8.20 | (7.89,8.52) | 0.16 |  |
| Religious service attendance | More than 1/week | 8.11 | (7.90,8.32) | 0.11 | < .001 | 8.44 | (8.24,8.64) | 0.10 | < .001 | 8.55 | (8.34,8.77) | 0.11 | < .001 |
|  | 1/week | 7.52 | (7.30,7.73) | 0.11 |  | 7.78 | (7.48,8.08) | 0.15 |  | 7.97 | (7.75,8.20) | 0.11 |  |
|  | 1-3/month | 7.28 | (7.05,7.51) | 0.12 |  | 7.55 | (7.31,7.80) | 0.12 |  | 7.73 | (7.55,7.92) | 0.09 |  |
|  | A few times a year | 7.06 | (6.85,7.26) | 0.10 |  | 7.23 | (7.04,7.42) | 0.10 |  | 7.52 | (7.34,7.70) | 0.09 |  |
|  | Never | 7.06 | (6.82,7.31) | 0.13 |  | 6.97 | (6.68,7.27) | 0.15 |  | 7.43 | (7.26,7.61) | 0.09 |  |
| Education | Up to 8 years | 6.53 | (6.19,6.86) | 0.17 | < .001 | 7.11 | (6.69,7.53) | 0.21 | 0.048 | 7.04 | (6.74,7.34) | 0.15 | < .001 |
|  | 9-15 years | 7.38 | (7.21,7.54) | 0.08 |  | 7.56 | (7.39,7.74) | 0.09 |  | 7.79 | (7.64,7.94) | 0.08 |  |
|  | 16+ years | 7.39 | (7.22,7.56) | 0.09 |  | 7.44 | (7.24,7.65) | 0.10 |  | 7.82 | (7.68,7.96) | 0.07 |  |
| Immigration status | Born in this country | 7.44 | (7.29,7.59) | 0.08 | < .001 | 7.62 | (7.45,7.80) | 0.09 | < .001 | 7.89 | (7.77,8.01) | 0.06 | < .001 |
|  | Born in another country | 6.99 | (6.77,7.21) | 0.11 |  | 7.00 | (6.79,7.22) | 0.11 |  | 7.34 | (7.14,7.53) | 0.10 |  |
| Religious affiliation | Christianity | 6.64 | (6.04,7.25) | 0.30 | < .001 | 7.20 | (6.35,8.05) | 0.42 | < .001 | 7.06 | (6.63,7.50) | 0.21 | < .001 |
|  | Islam | 6.92 | (6.68,7.15) | 0.12 |  | 7.27 | (7.03,7.51) | 0.12 |  | 7.07 | (6.82,7.33) | 0.13 |  |
|  | Judaism | 7.44 | (7.26,7.61) | 0.09 |  | 7.53 | (7.33,7.73) | 0.10 |  | 7.93 | (7.80,8.06) | 0.07 |  |
|  | Baha'i | 10.00 | * | * |  | 10.00 | * | * |  | 10.00 | * | * |  |
|  | Taoism | 5.00 | * | * |  | 4.00 | * | * |  | 5.00 | * | * |  |
|  | Primal, Animist, or Folk religion | 8.00 | * | * |  | 9.00 | * | * |  | 8.00 | * | * |  |
|  | Some other religion | 6.98 | (5.89,8.08) | 0.55 |  | 7.10 | (6.18,8.01) | 0.46 |  | 7.10 | (6.18,8.01) | 0.46 |  |
|  | No religion/Atheist/Agnostic | 7.13 | (6.58,7.67) | 0.27 |  | 7.24 | (6.73,7.75) | 0.25 |  | 7.58 | (6.99,8.17) | 0.30 |  |
| Race/Ethnicity | Arab | 6.88 | (6.66,7.11) | 0.11 | < .001 | 7.27 | (7.03,7.50) | 0.12 | 0.271 | 7.06 | (6.82,7.31) | 0.12 | < .001 |
|  | Jewish | 7.43 | (7.26,7.61) | 0.09 |  | 7.52 | (7.32,7.72) | 0.10 |  | 7.92 | (7.79,8.05) | 0.07 |  |
|  | Other | 7.56 | (7.08,8.03) | 0.24 |  | 7.49 | (6.90,8.08) | 0.29 |  | 7.83 | (7.30,8.36) | 0.26 |  |

Table S10c. Childhood predictors regression analysis results for Israel

|  | | Life Evaluation | | | | Life Satisfaction | | | | Happiness | | | |
| --- | --- | --- | --- | --- | --- | --- | --- | --- | --- | --- | --- | --- | --- |
| Variable | Category | Est | 95% CI | SE | Global p-value | Est | 95% CI | SE | Global p-value | Est | 95% CI | SE | Global p-value |
| Relationship with mother | (Ref: Very bad/somewhat bad) |  |  |  | 0.203 |  |  |  | 0.160 |  |  |  | 0.919 |
|  | Very good/somewhat good | 0.27 | (-0.15, 0.69) | 0.21 |  | 0.33 | (-0.13, 0.80) | 0.24 |  | 0.01 | (-0.34, 0.35) | 0.17 |  |
| Relationship with father | (Ref: Very bad/somewhat bad) |  |  |  | 0.173 |  |  |  | 0.190 |  |  |  | 0.601 |
|  | Very good/somewhat good | 0.26 | (-0.11, 0.63) | 0.19 |  | 0.24 | (-0.12, 0.61) | 0.19 |  | 0.08 | (-0.22, 0.37) | 0.15 |  |
| Parent marital status | (Ref: Parents married) |  |  |  | 0.031 |  |  |  | <.001 |  |  |  | 0.003 |
|  | Divorced | -0.14 | (-0.43, 0.15) | 0.15 |  | -0.66 | (-1.03, -0.28) | 0.19 |  | -0.49 | (-0.80, -0.18) | 0.16 |  |
|  | Parents were never married | -0.71 | (-1.61, 0.19) | 0.44 |  | -0.03 | (-0.60, 0.55) | 0.29 |  | -0.11 | (-0.61, 0.39) | 0.25 |  |
|  | One or both parents had died | -0.44 | (-0.87, -0.01) | 0.22 |  | -0.53 | (-0.96, -0.11) | 0.22 |  | -0.41 | (-0.82, -0.01) | 0.20 |  |
| Subjective financial status of family growing up | (Ref: Got by) |  |  |  | 0.641 |  |  |  | 0.086 |  |  |  | 0.893 |
|  | Lived comfortably | 0.06 | (-0.11, 0.23) | 0.09 |  | 0.12 | (-0.07, 0.31) | 0.10 |  | 0.05 | (-0.12, 0.22) | 0.09 |  |
|  | Found it difficult | 0.02 | (-0.16, 0.19) | 0.09 |  | 0.18 | (-0.01, 0.37) | 0.10 |  | 0.03 | (-0.12, 0.19) | 0.08 |  |
|  | Found it very difficult | -0.19 | (-0.57, 0.19) | 0.19 |  | -0.21 | (-0.61, 0.20) | 0.21 |  | -0.05 | (-0.33, 0.23) | 0.14 |  |
| Outsider growing up | (Ref: No) |  |  |  | 0.360 |  |  |  | 0.479 |  |  |  | 0.172 |
|  | Yes | -0.13 | (-0.42, 0.16) | 0.15 |  | -0.10 | (-0.41, 0.21) | 0.16 |  | -0.17 | (-0.40, 0.07) | 0.12 |  |
| Self-rated health growing up | (Ref: Good) |  |  |  | 0.003 |  |  |  | 0.004 |  |  |  | 0.014 |
|  | Excellent | 0.51 | (0.23, 0.78) | 0.14 |  | 0.54 | (0.21, 0.86) | 0.17 |  | 0.44 | (0.20, 0.69) | 0.13 |  |
|  | Very good | 0.34 | (0.08, 0.60) | 0.13 |  | 0.42 | (0.14, 0.69) | 0.14 |  | 0.36 | (0.13, 0.59) | 0.12 |  |
|  | Fair | -0.00 | (-0.49, 0.49) | 0.25 |  | -0.19 | (-0.71, 0.34) | 0.27 |  | -0.07 | (-0.44, 0.31) | 0.19 |  |
|  | Poor | 0.38 | (-0.83, 1.60) | 0.62 |  | 0.15 | (-0.93, 1.23) | 0.55 |  | 0.58 | (-1.51, 2.66) | 1.06 |  |
| Immigration status | (Ref: Born in this country) |  |  |  | 0.184 |  |  |  | 0.062 |  |  |  | <.001 |
|  | Born in another country | -0.15 | (-0.37, 0.07) | 0.11 |  | -0.24 | (-0.50, 0.01) | 0.13 |  | -0.40 | (-0.62, -0.18) | 0.11 |  |
| Age 12 religious service attendance | (Ref: Never) |  |  |  | 0.056 |  |  |  | <.001 |  |  |  | 0.002 |
|  | At least 1/week | 0.28 | (0.05, 0.52) | 0.12 |  | 0.43 | (0.18, 0.68) | 0.13 |  | 0.41 | (0.19, 0.63) | 0.11 |  |
|  | 1-3/month | 0.33 | (0.06, 0.59) | 0.13 |  | 0.42 | (0.11, 0.73) | 0.16 |  | 0.30 | (0.06, 0.54) | 0.12 |  |
|  | < 1/month | 0.20 | (0.00, 0.41) | 0.10 |  | 0.50 | (0.29, 0.72) | 0.11 |  | 0.28 | (0.13, 0.43) | 0.08 |  |
| Year of birth | (Ref: 1998-2005; current age: 18-24) |  |  |  | <.001 |  |  |  | <.001 |  |  |  | <.001 |
|  | 1993-1998; age 25-29 | -0.15 | (-0.38, 0.08) | 0.12 |  | -0.08 | (-0.34, 0.18) | 0.13 |  | -0.16 | (-0.38, 0.07) | 0.12 |  |
|  | 1983-1993; age 30-39 | -0.22 | (-0.52, 0.08) | 0.15 |  | -0.42 | (-0.69, -0.15) | 0.14 |  | -0.20 | (-0.43, 0.03) | 0.12 |  |
|  | 1973-1983; age 40-49 | -0.33 | (-0.63, -0.03) | 0.15 |  | -0.51 | (-0.82, -0.21) | 0.15 |  | -0.18 | (-0.43, 0.07) | 0.13 |  |
|  | 1963-1973; age 50-59 | -0.33 | (-0.62, -0.04) | 0.15 |  | -0.63 | (-0.95, -0.31) | 0.16 |  | -0.34 | (-0.58, -0.11) | 0.12 |  |
|  | 1953-1963; age 60-69 | -0.24 | (-0.54, 0.06) | 0.15 |  | -0.28 | (-0.56, -0.01) | 0.14 |  | -0.21 | (-0.47, 0.04) | 0.13 |  |
|  | 1943-1953; age 70-79 | -0.87 | (-1.22, -0.52) | 0.18 |  | -1.00 | (-1.40, -0.61) | 0.20 |  | -0.67 | (-0.96, -0.38) | 0.15 |  |
|  | 1943 or earlier; age 80+ | -1.30 | (-1.86, -0.73) | 0.29 |  | -0.82 | (-1.56, -0.08) | 0.38 |  | -0.80 | (-1.31, -0.29) | 0.26 |  |
| Gender | (Ref: Male) |  |  |  | <.001 |  |  |  | 0.527 |  |  |  | 0.023 |
|  | Female | -0.21 | (-0.33, -0.09) | 0.06 |  | -0.07 | (-0.22, 0.08) | 0.08 |  | -0.08 | (-0.20, 0.05) | 0.06 |  |
|  | Other | 1.94 | (1.43, 2.45) | 0.26 |  | 0.15 | (-0.40, 0.69) | 0.28 |  | -0.57 | (-1.12, -0.01) | 0.28 |  |
| Religious affiliation | (Ref: Judaism) |  |  |  | 0.631 |  |  |  | 0.722 |  |  |  | 0.762 |
|  | Islam | 0.20 | (-0.48, 0.88) | 0.35 |  | -0.05 | (-0.83, 0.72) | 0.40 |  | -0.20 | (-0.91, 0.51) | 0.36 |  |
|  | Collapsed affiliations with prevalence<3% | -0.04 | (-0.39, 0.31) | 0.18 |  | 0.12 | (-0.30, 0.54) | 0.21 |  | -0.12 | (-0.50, 0.26) | 0.19 |  |
| Race/ethnicity | (Ref: Plurality group) |  |  |  | 0.004 |  |  |  | 0.247 |  |  |  | 0.006 |
|  | Non-plurality groups | -0.92 | (-1.56, -0.27) | 0.33 |  | -0.39 | (-1.09, 0.30) | 0.35 |  | -0.89 | (-1.58, -0.21) | 0.35 |  |
| Abuse | (Ref: No) |  |  |  |  |  |  |  |  |  |  |  |  |

Table S10d. Sensitivity to unmeasured confounding of childhood predictors in Israel

|  | | Life Evaluation | | Life Satisfaction | | Happiness | |
| --- | --- | --- | --- | --- | --- | --- | --- |
| Variable | Category | E-value for Estimate | E-value for 95% CI | E-value for Estimate | E-value for 95% CI | E-value for Estimate | E-value for 95% CI |
| Relationship with mother | (Ref: Very bad/somewhat bad) |  |  |  |  |  |  |
|  | Very good/somewhat good | 1.55 | 1.00 | 1.60 | 1.00 | 1.06 | 1.00 |
| Relationship with father | (Ref: Very bad/somewhat bad) |  |  |  |  |  |  |
|  | Very good/somewhat good | 1.54 | 1.00 | 1.48 | 1.00 | 1.25 | 1.00 |
| Parent marital status | (Ref: Parents married) |  |  |  |  |  |  |
|  | Divorced | 1.35 | 1.00 | 2.03 | 1.53 | 1.95 | 1.45 |
|  | Parents were never married | 2.21 | 1.00 | 1.12 | 1.00 | 1.32 | 1.00 |
|  | One or both parents had died | 1.80 | 1.09 | 1.87 | 1.29 | 1.82 | 1.09 |
| Subjective financial status of family growing up | (Ref: Got by) |  |  |  |  |  |  |
|  | Lived comfortably | 1.20 | 1.00 | 1.30 | 1.00 | 1.19 | 1.00 |
|  | Found it difficult | 1.10 | 1.00 | 1.39 | 1.00 | 1.15 | 1.00 |
|  | Found it very difficult | 1.44 | 1.00 | 1.43 | 1.00 | 1.21 | 1.00 |
| Outsider growing up | (Ref: No) |  |  |  |  |  |  |
|  | Yes | 1.34 | 1.00 | 1.26 | 1.00 | 1.42 | 1.00 |
| Self-rated health growing up | (Ref: Good) |  |  |  |  |  |  |
|  | Excellent | 1.90 | 1.50 | 1.87 | 1.44 | 1.87 | 1.47 |
|  | Very good | 1.66 | 1.26 | 1.71 | 1.33 | 1.74 | 1.35 |
|  | Fair | 1.03 | 1.00 | 1.40 | 1.00 | 1.23 | 1.00 |
|  | Poor | 1.72 | 1.00 | 1.35 | 1.00 | 2.09 | 1.00 |
| Immigration status | (Ref: Born in this country) |  |  |  |  |  |  |
|  | Born in another country | 1.37 | 1.00 | 1.48 | 1.00 | 1.81 | 1.45 |
| Age 12 religious service attendance | (Ref: Never) |  |  |  |  |  |  |
|  | At least 1/week | 1.57 | 1.19 | 1.73 | 1.39 | 1.81 | 1.45 |
|  | 1-3/month | 1.64 | 1.21 | 1.71 | 1.28 | 1.64 | 1.22 |
|  | < 1/month | 1.45 | 1.04 | 1.82 | 1.54 | 1.61 | 1.35 |
| Year of birth | (Ref: 1998-2005; current age: 18-24) |  |  |  |  |  |  |
|  | 1993-1998; age 25-29 | 1.37 | 1.00 | 1.23 | 1.00 | 1.41 | 1.00 |
|  | 1983-1993; age 30-39 | 1.48 | 1.00 | 1.72 | 1.35 | 1.47 | 1.00 |
|  | 1973-1983; age 40-49 | 1.64 | 1.14 | 1.84 | 1.44 | 1.44 | 1.00 |
|  | 1963-1973; age 50-59 | 1.64 | 1.15 | 2.00 | 1.58 | 1.71 | 1.31 |
|  | 1953-1963; age 60-69 | 1.51 | 1.00 | 1.53 | 1.07 | 1.50 | 1.00 |
|  | 1943-1953; age 70-79 | 2.47 | 1.92 | 2.53 | 1.96 | 2.25 | 1.77 |
|  | 1943 or earlier; age 80+ | 3.25 | 2.25 | 2.26 | 1.23 | 2.48 | 1.63 |
| Gender | (Ref: Male) |  |  |  |  |  |  |
|  | Female | 1.46 | 1.26 | 1.22 | 1.00 | 1.25 | 1.00 |
|  | Other | 4.74 | 3.53 | 1.34 | 1.00 | 2.07 | 1.14 |
| Religious affiliation | (Ref: Judaism) |  |  |  |  |  |  |
|  | Islam | 1.45 | 1.00 | 1.18 | 1.00 | 1.47 | 1.00 |
|  | Collapsed affiliations with prevalence<3% | 1.17 | 1.00 | 1.30 | 1.00 | 1.34 | 1.00 |
| Race/ethnicity | (Ref: Plurality group) |  |  |  |  |  |  |
|  | Non-plurality groups | 2.55 | 1.56 | 1.68 | 1.00 | 2.66 | 1.50 |
| Abuse | (Ref: No) |  |  |  |  |  |  |

Table S10e. Complete-case supplemental analysis of means by demographic category for Israel

|  | | Life Evaluation | | | | Life Satisfaction | | | | Happiness | | | |
| --- | --- | --- | --- | --- | --- | --- | --- | --- | --- | --- | --- | --- | --- |
| Variable | Category | Mean | 95% CI | SE | Global p-value | Mean | 95% CI | SE | Global p-value | Mean | 95% CI | SE | Global p-value |
| Age group | 18-24 | 7.76 | (7.52,8.00) | 0.12 | < .001 | 8.07 | (7.86,8.27) | 0.10 | < .001 | 8.12 | (7.91,8.34) | 0.11 | < .001 |
|  | 25-29 | 7.60 | (7.40,7.80) | 0.10 |  | 7.93 | (7.71,8.15) | 0.11 |  | 7.94 | (7.73,8.15) | 0.11 |  |
|  | 30-39 | 7.50 | (7.32,7.69) | 0.09 |  | 7.56 | (7.35,7.77) | 0.11 |  | 7.87 | (7.72,8.03) | 0.08 |  |
|  | 40-49 | 7.36 | (7.17,7.55) | 0.10 |  | 7.51 | (7.31,7.71) | 0.10 |  | 7.81 | (7.63,7.99) | 0.09 |  |
|  | 50-59 | 7.31 | (7.10,7.52) | 0.11 |  | 7.36 | (7.13,7.58) | 0.11 |  | 7.64 | (7.46,7.82) | 0.09 |  |
|  | 60-69 | 7.36 | (7.14,7.58) | 0.11 |  | 7.61 | (7.39,7.83) | 0.11 |  | 7.76 | (7.57,7.94) | 0.09 |  |
|  | 70-79 | 6.70 | (6.40,7.00) | 0.15 |  | 7.01 | (6.69,7.32) | 0.16 |  | 7.24 | (7.01,7.48) | 0.12 |  |
|  | 80 or older | 6.20 | (5.69,6.71) | 0.26 |  | 7.18 | (6.59,7.77) | 0.30 |  | 7.02 | (6.50,7.53) | 0.26 |  |
| Gender | Female | 7.25 | (7.10,7.40) | 0.08 | < .001 | 7.52 | (7.36,7.69) | 0.08 | < .001 | 7.69 | (7.56,7.82) | 0.07 | < .001 |
|  | Male | 7.52 | (7.37,7.67) | 0.08 |  | 7.66 | (7.51,7.81) | 0.08 |  | 7.88 | (7.75,8.01) | 0.07 |  |
|  | Other | 9.00 | (9.00,9.00) | 0.00 |  | 7.00 | (7.00,7.00) | 0.00 |  | 7.00 | (7.00,7.00) | 0.00 |  |
| Marital status | Divorced | 6.74 | (6.46,7.03) | 0.14 | < .001 | 6.65 | (6.32,6.97) | 0.17 | < .001 | 7.10 | (6.85,7.34) | 0.13 | < .001 |
|  | Domestic partner | 6.83 | (6.42,7.25) | 0.21 |  | 7.00 | (6.63,7.38) | 0.19 |  | 7.72 | (7.46,7.99) | 0.13 |  |
|  | Married | 7.56 | (7.42,7.70) | 0.07 |  | 7.76 | (7.61,7.91) | 0.08 |  | 7.97 | (7.85,8.10) | 0.06 |  |
|  | Separated | 6.69 | (6.18,7.21) | 0.26 |  | 6.90 | (6.38,7.42) | 0.26 |  | 7.07 | (6.65,7.48) | 0.21 |  |
|  | Single/Never been married | 7.52 | (7.33,7.71) | 0.10 |  | 7.75 | (7.57,7.93) | 0.09 |  | 7.77 | (7.59,7.96) | 0.09 |  |
|  | Widowed | 6.58 | (6.29,6.87) | 0.15 |  | 7.09 | (6.74,7.44) | 0.18 |  | 6.99 | (6.75,7.24) | 0.12 |  |
| Employment | Employed for an employer | 7.48 | (7.35,7.61) | 0.07 | < .001 | 7.61 | (7.44,7.77) | 0.08 | < .001 | 7.84 | (7.71,7.96) | 0.06 | < .001 |
|  | Homemaker | 6.99 | (6.76,7.22) | 0.12 |  | 7.55 | (7.14,7.96) | 0.21 |  | 7.39 | (7.09,7.68) | 0.15 |  |
|  | None of these/Other | 7.69 | (7.36,8.02) | 0.17 |  | 7.85 | (7.50,8.20) | 0.18 |  | 8.20 | (7.89,8.51) | 0.16 |  |
|  | Retired | 6.85 | (6.59,7.11) | 0.13 |  | 7.23 | (6.96,7.51) | 0.14 |  | 7.40 | (7.18,7.62) | 0.11 |  |
|  | Self-employed | 7.48 | (7.24,7.72) | 0.12 |  | 7.49 | (7.22,7.76) | 0.14 |  | 7.94 | (7.72,8.15) | 0.11 |  |
|  | Student | 7.99 | (7.71,8.27) | 0.14 |  | 8.31 | (8.07,8.55) | 0.12 |  | 8.29 | (8.03,8.55) | 0.13 |  |
|  | Unemployed and looking for a job | 6.69 | (6.25,7.12) | 0.22 |  | 6.96 | (6.60,7.32) | 0.18 |  | 7.06 | (6.62,7.50) | 0.22 |  |
| Religious service attendance | A few times a year | 7.07 | (6.87,7.27) | 0.10 | < .001 | 7.29 | (7.10,7.47) | 0.10 | < .001 | 7.52 | (7.34,7.70) | 0.09 | < .001 |
|  | More than once a week | 8.14 | (7.93,8.34) | 0.10 |  | 8.47 | (8.28,8.67) | 0.10 |  | 8.60 | (8.42,8.79) | 0.09 |  |
|  | Never | 7.17 | (6.97,7.38) | 0.10 |  | 7.24 | (7.03,7.45) | 0.11 |  | 7.48 | (7.31,7.64) | 0.08 |  |
|  | Once a week | 7.55 | (7.36,7.74) | 0.10 |  | 7.81 | (7.52,8.10) | 0.15 |  | 7.96 | (7.74,8.19) | 0.11 |  |
|  | One to three times a month | 7.30 | (7.08,7.53) | 0.11 |  | 7.58 | (7.34,7.82) | 0.12 |  | 7.73 | (7.54,7.92) | 0.09 |  |
| Education | Up to 8 years | 6.53 | (6.19,6.86) | 0.17 | < .001 | 7.13 | (6.71,7.55) | 0.21 | 0.015 | 7.05 | (6.75,7.36) | 0.15 | < .001 |
|  | 16+ years | 7.43 | (7.27,7.59) | 0.08 |  | 7.57 | (7.40,7.74) | 0.09 |  | 7.84 | (7.71,7.97) | 0.07 |  |
|  | 9 to 15 years | 7.45 | (7.30,7.59) | 0.07 |  | 7.68 | (7.53,7.82) | 0.07 |  | 7.81 | (7.67,7.95) | 0.07 |  |
| Immigration status | Born in another country | 7.02 | (6.80,7.24) | 0.11 | < .001 | 7.12 | (6.91,7.32) | 0.10 | < .001 | 7.37 | (7.19,7.55) | 0.09 | < .001 |
|  | Born in this country | 7.49 | (7.36,7.63) | 0.07 |  | 7.73 | (7.59,7.88) | 0.08 |  | 7.91 | (7.79,8.02) | 0.06 |  |
| Religious affiliation | Christianity | 6.64 | (6.04,7.25) | 0.30 | < .001 | 7.20 | (6.35,8.05) | 0.42 | * | 7.06 | (6.63,7.50) | 0.21 | < .001 |
|  | Islam | 6.99 | (6.76,7.22) | 0.12 |  | 7.36 | (7.11,7.60) | 0.13 |  | 7.15 | (6.94,7.36) | 0.11 |  |
|  | Judaism | 7.48 | (7.33,7.64) | 0.08 |  | 7.65 | (7.49,7.82) | 0.08 |  | 7.94 | (7.81,8.07) | 0.07 |  |
|  | No religion/Atheist/Agnostic | 7.13 | (6.58,7.67) | 0.27 |  | 7.24 | (6.73,7.75) | 0.25 |  | 7.58 | (6.99,8.18) | 0.30 |  |
|  | Primal, Animist, or Folk religion | 8.00 | * | * |  | 9.00 | * | * |  | 8.00 | * | * |  |
|  | Some other religion | 6.98 | (5.89,8.08) | 0.55 |  | 7.10 | (6.18,8.01) | 0.46 |  | 7.10 | (6.18,8.01) | 0.46 |  |
|  | Taoism | 5.00 | * | * |  | 4.00 | * | * |  | 5.00 | * | * |  |
|  | Baha’i | 10.00 | * | * |  | 10.00 | * | * |  | 10.00 | * | * |  |

Table S10f. Complete-case supplemental analysis of childhood predictors regression analysis results for Israel

|  | | Life Evaluation | | | | Life Satisfaction | | | | Happiness | | | |
| --- | --- | --- | --- | --- | --- | --- | --- | --- | --- | --- | --- | --- | --- |
| Variable | Category | Est | 95% CI | SE | Global p-value | Est | 95% CI | SE | Global p-value | Est | 95% CI | SE | Global p-value |
| Relationship with mother | (Ref: Very bad/somewhat bad) |  |  |  | 0.190 |  |  |  | 0.427 |  |  |  | 0.931 |
|  | Very good/somewhat good | 0.28 | (-0.14,0.71) | 0.21 |  | 0.17 | (-0.24,0.57) | 0.21 |  | -0.02 | (-0.37,0.33) | 0.18 |  |
| Relationship with father | (Ref: Very bad/somewhat bad) |  |  |  | 0.346 |  |  |  | 0.797 |  |  |  | 0.624 |
|  | Very good/somewhat good | 0.16 | (-0.17,0.49) | 0.17 |  | 0.04 | (-0.26,0.34) | 0.15 |  | 0.07 | (-0.22,0.36) | 0.15 |  |
| Parent marital status | (Ref: Parents married) |  |  |  | 0.015 |  |  |  | 0.002 |  |  |  | 0.001 |
|  | No, one or both of them had died | -0.38 | (-0.83,0.08) | 0.23 |  | 0.09 | (-0.40,0.58) | 0.25 |  | -0.07 | (-0.54,0.40) | 0.24 |  |
|  | No, they were never married | -0.65 | (-1.34,0.04) | 0.35 |  | 0.39 | (-0.24,1.01) | 0.32 |  | 0.27 | (-0.26,0.80) | 0.27 |  |
|  | Yes, married | 0.09 | (-0.20,0.38) | 0.15 |  | 0.60 | (0.26,0.94) | 0.17 |  | 0.37 | (0.13,0.61) | 0.12 |  |
| Subjective financial status of family growing up | (Ref: Got by) |  |  |  | 0.507 |  |  |  | 0.073 |  |  |  | 0.859 |
|  | Found it difficult | -0.01 | (-0.19,0.16) | 0.09 |  | 0.13 | (-0.05,0.30) | 0.09 |  | -0.00 | (-0.16,0.16) | 0.08 |  |
|  | Found it very difficult | -0.26 | (-0.63,0.12) | 0.19 |  | -0.36 | (-0.75,0.04) | 0.20 |  | -0.09 | (-0.36,0.18) | 0.14 |  |
|  | Lived comfortably | 0.04 | (-0.12,0.21) | 0.08 |  | 0.13 | (-0.04,0.31) | 0.09 |  | 0.05 | (-0.10,0.21) | 0.08 |  |
| Outsider growing up | (Ref: No) |  |  |  | 0.239 |  |  |  | 0.198 |  |  |  | 0.095 |
|  | Yes | -0.16 | (-0.42,0.10) | 0.13 |  | -0.15 | (-0.39,0.08) | 0.12 |  | -0.21 | (-0.45,0.03) | 0.12 |  |
| Self-rated health growing up | (Ref: Good) |  |  |  | 0.006 |  |  |  | 0.011 |  |  |  | 0.014 |
|  | Excellent | 0.47 | (0.21,0.73) | 0.13 |  | 0.51 | (0.18,0.83) | 0.16 |  | 0.45 | (0.20,0.70) | 0.13 |  |
|  | Fair | 0.00 | (-0.44,0.44) | 0.22 |  | -0.13 | (-0.52,0.26) | 0.20 |  | -0.07 | (-0.43,0.28) | 0.18 |  |
|  | Poor | 0.28 | (-0.91,1.46) | 0.61 |  | 0.03 | (-1.08,1.14) | 0.57 |  | 0.51 | (-1.49,2.51) | 1.02 |  |
|  | Very good | 0.33 | (0.09,0.56) | 0.12 |  | 0.42 | (0.16,0.69) | 0.14 |  | 0.34 | (0.11,0.57) | 0.12 |  |
| Immigration status | (Ref: Born in this country) |  |  |  | 0.119 |  |  |  | 0.003 |  |  |  | <.001 |
|  | Born in another country | -0.17 | (-0.37,0.04) | 0.11 |  | -0.32 | (-0.52,-0.11) | 0.10 |  | -0.35 | (-0.54,-0.16) | 0.10 |  |
| Age 12 religious service attendance | (Ref: Never) |  |  |  | 0.128 |  |  |  | 0.002 |  |  |  | 0.006 |
|  | At least once a week | 0.24 | (0.01,0.47) | 0.12 |  | 0.32 | (0.09,0.55) | 0.12 |  | 0.35 | (0.14,0.56) | 0.11 |  |
|  | Less than once a month | 0.16 | (-0.05,0.38) | 0.11 |  | 0.37 | (0.18,0.57) | 0.10 |  | 0.24 | (0.09,0.39) | 0.08 |  |
|  | One to three times a month | 0.28 | (0.02,0.54) | 0.13 |  | 0.27 | (0.00,0.55) | 0.14 |  | 0.26 | (0.02,0.50) | 0.12 |  |
| Year of birth | (Ref: 1998-2005; current age: 18-24) |  |  |  | <.001 |  |  |  | <.001 |  |  |  | <.001 |
|  | 1993-1998; age 25-29 | -0.16 | (-0.38,0.07) | 0.11 |  | -0.13 | (-0.38,0.12) | 0.13 |  | -0.19 | (-0.41,0.03) | 0.11 |  |
|  | 1983-1993; age 30-39 | -0.21 | (-0.48,0.06) | 0.14 |  | -0.40 | (-0.65,-0.15) | 0.13 |  | -0.17 | (-0.39,0.04) | 0.11 |  |
|  | 1973-1983; age 40-49 | -0.33 | (-0.61,-0.05) | 0.14 |  | -0.44 | (-0.71,-0.18) | 0.13 |  | -0.22 | (-0.45,0.02) | 0.12 |  |
|  | 1963-1973; age 50-59 | -0.32 | (-0.60,-0.03) | 0.14 |  | -0.54 | (-0.82,-0.25) | 0.14 |  | -0.36 | (-0.58,-0.14) | 0.11 |  |
|  | 1953-1963; age 60-69 | -0.27 | (-0.56,0.03) | 0.15 |  | -0.27 | (-0.55,-0.00) | 0.14 |  | -0.24 | (-0.49,-0.00) | 0.12 |  |
|  | 1943-1953; age 70-79 | -0.88 | (-1.21,-0.56) | 0.17 |  | -0.81 | (-1.15,-0.46) | 0.18 |  | -0.70 | (-0.98,-0.42) | 0.14 |  |
|  | 1943 or earlier; age 80+ | -1.27 | (-1.80,-0.74) | 0.27 |  | -0.49 | (-1.10,0.12) | 0.31 |  | -0.84 | (-1.34,-0.35) | 0.25 |  |
| Gender | (Ref: Male) |  |  |  | <.001 |  |  |  | 0.756 |  |  |  | 0.006 |
|  | Male | 0.21 | (0.09,0.34) | 0.06 |  | 0.06 | (-0.10,0.21) | 0.08 |  | 0.11 | (-0.01,0.23) | 0.06 |  |
|  | Other | 2.09 | (1.63,2.55) | 0.23 |  | -0.03 | (-0.52,0.46) | 0.25 |  | -0.52 | (-0.95,-0.08) | 0.22 |  |
| Religious affiliation | (Ref: Judaism) |  |  |  | 0.472 |  |  |  | 0.164 |  |  |  | 0.026 |
|  | Islam | -0.34 | (-0.90,0.22) | 0.29 |  | -0.62 | (-1.25,0.01) | 0.32 |  | -0.73 | (-1.24,-0.21) | 0.26 |  |
|  | Collapsed affiliations with prevalence<3% | -0.19 | (-0.59,0.21) | 0.20 |  | -0.22 | (-0.65,0.20) | 0.22 |  | -0.30 | (-0.71,0.10) | 0.21 |  |
| Race/ethnicity | (Ref: Plurality group) |  |  |  | 0.202 |  |  |  | 0.616 |  |  |  | 0.213 |
|  | Non-plurality groups | -0.34 | (-0.87,0.18) | 0.27 |  | 0.14 | (-0.40,0.67) | 0.27 |  | -0.30 | (-0.76,0.17) | 0.24 |  |
| Abuse | (Ref: No) |  |  |  |  |  |  |  |  |  |  |  |  |

Table S10g. Complete-case supplemental analysis of sensitivity to unmeasured confounding of childhood predictors in Israel

|  | | Life Evaluation | | Life Satisfaction | | Happiness | |
| --- | --- | --- | --- | --- | --- | --- | --- |
| Variable | Category | E-value for Estimate | E-value for 95% CI | E-value for Estimate | E-value for 95% CI | E-value for Estimate | E-value for 95% CI |
| Relationship with mother | (Ref: Very bad/somewhat bad) |  |  |  |  |  |  |
|  | Very good/somewhat good | 1.60 | 1.00 | 1.40 | 1.00 | 1.10 | 1.00 |
| Relationship with father | (Ref: Very bad/somewhat bad) |  |  |  |  |  |  |
|  | Very good/somewhat good | 1.40 | 1.00 | 1.16 | 1.00 | 1.25 | 1.00 |
| Parent marital status | (Ref: Parents married) |  |  |  |  |  |  |
|  | No, one or both of them had died | 1.74 | 1.00 | 1.26 | 1.00 | 1.25 | 1.00 |
|  | No, they were never married | 2.18 | 1.00 | 1.74 | 1.00 | 1.60 | 1.00 |
|  | Yes, married | 1.28 | 1.00 | 2.06 | 1.54 | 1.77 | 1.36 |
| Subjective financial status of family growing up | (Ref: Got by) |  |  |  |  |  |  |
|  | Found it difficult | 1.10 | 1.00 | 1.34 | 1.00 | 1.04 | 1.00 |
|  | Found it very difficult | 1.55 | 1.00 | 1.69 | 1.00 | 1.29 | 1.00 |
|  | Lived comfortably | 1.18 | 1.00 | 1.34 | 1.00 | 1.21 | 1.00 |
| Outsider growing up | (Ref: No) |  |  |  |  |  |  |
|  | Yes | 1.40 | 1.00 | 1.38 | 1.00 | 1.50 | 1.00 |
| Self-rated health growing up | (Ref: Good) |  |  |  |  |  |  |
|  | Excellent | 1.89 | 1.49 | 1.91 | 1.43 | 1.90 | 1.48 |
|  | Fair | 1.02 | 1.00 | 1.34 | 1.00 | 1.25 | 1.00 |
|  | Poor | 1.59 | 1.00 | 1.14 | 1.00 | 2.01 | 1.00 |
|  | Very good | 1.66 | 1.29 | 1.79 | 1.39 | 1.72 | 1.33 |
| Immigration status | (Ref: Born in this country) |  |  |  |  |  |  |
|  | Born in another country | 1.41 | 1.00 | 1.63 | 1.31 | 1.74 | 1.41 |
| Age 12 religious service attendance | (Ref: Never) |  |  |  |  |  |  |
|  | At least once a week | 1.53 | 1.10 | 1.63 | 1.26 | 1.73 | 1.38 |
|  | Less than once a month | 1.40 | 1.00 | 1.71 | 1.41 | 1.55 | 1.29 |
|  | One to three times a month | 1.59 | 1.12 | 1.57 | 1.05 | 1.59 | 1.13 |
| Year of birth | (Ref: 1998-2005; current age: 18-24) |  |  |  |  |  |  |
|  | 1993-1998; age 25-29 | 1.40 | 1.00 | 1.34 | 1.00 | 1.47 | 1.00 |
|  | 1983-1993; age 30-39 | 1.48 | 1.00 | 1.75 | 1.37 | 1.44 | 1.00 |
|  | 1973-1983; age 40-49 | 1.66 | 1.19 | 1.82 | 1.42 | 1.51 | 1.00 |
|  | 1963-1973; age 50-59 | 1.65 | 1.16 | 1.95 | 1.53 | 1.75 | 1.38 |
|  | 1953-1963; age 60-69 | 1.57 | 1.00 | 1.57 | 1.02 | 1.56 | 1.05 |
|  | 1943-1953; age 70-79 | 2.58 | 2.03 | 2.38 | 1.84 | 2.34 | 1.86 |
|  | 1943 or earlier; age 80+ | 3.33 | 2.32 | 1.88 | 1.00 | 2.61 | 1.74 |
| Gender | (Ref: Male) |  |  |  |  |  |  |
|  | Male | 1.49 | 1.28 | 1.20 | 1.00 | 1.32 | 1.00 |
|  | Other | 5.53 | 4.20 | 1.15 | 1.00 | 2.01 | 1.26 |
| Religious affiliation | (Ref: Judaism) |  |  |  |  |  |  |
|  | Islam | 1.69 | 1.00 | 2.08 | 1.00 | 2.39 | 1.51 |
|  | Collapsed affiliations with prevalence<3% | 1.45 | 1.00 | 1.49 | 1.00 | 1.66 | 1.00 |
| Race/ethnicity | (Ref: Plurality group) |  |  |  |  |  |  |
|  | Non-plurality groups | 1.69 | 1.00 | 1.35 | 1.00 | 1.65 | 1.00 |
| Abuse | (Ref: No) |  |  |  |  |  |  |

# Tables S11a-g: Japan

Table S11a. Nationally representative descriptive statistics for Japan

| **Characteristic** | **N = 20,543**1 |
| --- | --- |
| **Age group** |  |
| 1998-2005; age 18-24 | 1,589 (7.7%) |
| 1993-1998; age 25-29 | 806 (3.9%) |
| 1983-1993; age 30-39 | 2,851 (14%) |
| 1973-1983; age 40-49 | 3,363 (16%) |
| 1963-1973; age 50-59 | 3,770 (18%) |
| 1953-1963; age 60-69 | 4,118 (20%) |
| 1943-1953; age 70-79 | 3,554 (17%) |
| 1943 or earlier; age 80+ | 493 (2.4%) |
| (Missing) | 0 (0%) |
| **Gender** |  |
| Male | 9,847 (48%) |
| Female | 10,602 (52%) |
| Other | 28 (0.1%) |
| (Missing) | 66 (0.3%) |
| **Respondent Marital status** |  |
| Married | 11,837 (58%) |
| Separated | 190 (0.9%) |
| Divorced | 2,126 (10%) |
| Widowed | 1,179 (5.7%) |
| Single, never married | 5,004 (24%) |
| Domestic Partner | 144 (0.7%) |
| (Missing) | 64 (0.3%) |
| **Employment** |  |
| Employed for an employer | 10,853 (53%) |
| Self-employed | 1,748 (8.5%) |
| Retired | 2,535 (12%) |
| Student | 491 (2.4%) |
| Homemaker | 1,276 (6.2%) |
| Unemployed and looking for a job | 622 (3.0%) |
| None of these/Other | 2,983 (15%) |
| (Missing) | 36 (0.2%) |
| **Religious service attendance as an adult (now)** |  |
| More than 1/week | 316 (1.5%) |
| 1/week | 348 (1.7%) |
| 1-3/month | 862 (4.2%) |
| A few times a year | 3,112 (15%) |
| Never | 15,788 (77%) |
| (Missing) | 117 (0.6%) |
| **Education (years)** |  |
| Up to 8 years | 567 (2.8%) |
| 9-15 years | 14,893 (72%) |
| 16+ years | 5,083 (25%) |
| (Missing) | 0 (0%) |
| **Immigration status** |  |
| Born in this country | 19,548 (95%) |
| Born in another country | 158 (0.8%) |
| (Missing) | 837 (4.1%) |
| **Religious affiliation as an adult (now)** |  |
| Christianity | 381 (1.9%) |
| Islam | 10 (<0.1%) |
| Hinduism | 5 (<0.1%) |
| Buddhism | 6,709 (33%) |
| Judaism | 10 (<0.1%) |
| Sikhism | 6 (<0.1%) |
| Baha'i | 2 (<0.1%) |
| Jainism | 11 (<0.1%) |
| Shinto | 469 (2.3%) |
| Taoism | 7 (<0.1%) |
| Confucianism | 17 (<0.1%) |
| Primal, Animist, or Folk religion | 19 (<0.1%) |
| Spiritism | 0 (0%) |
| Umbanda, Candomble, and other African-derived religions | 0 (0%) |
| Chinese folk/traditional religion | 0 (0%) |
| Some other religion | 46 (0.2%) |
| No religion/Atheist/Agnostic | 12,497 (61%) |
| (Missing) | 355 (1.7%) |
| **Relationship with mother growing up** |  |
| Very good | 5,630 (27%) |
| Somewhat good | 9,461 (46%) |
| Somewhat bad | 2,750 (13%) |
| Very bad | 799 (3.9%) |
| Does not apply | 1,838 (8.9%) |
| (Missing) | 66 (0.3%) |
| **Relationship with father growing up** |  |
| Very good | 4,156 (20%) |
| Somewhat good | 9,081 (44%) |
| Somewhat bad | 3,446 (17%) |
| Very bad | 1,223 (6.0%) |
| Does not apply | 2,580 (13%) |
| (Missing) | 57 (0.3%) |
| **Parent marital status at age 12** |  |
| Parents married | 17,713 (86%) |
| Divorced | 1,127 (5.5%) |
| Parents were never married | 591 (2.9%) |
| One or both parents had died | 754 (3.7%) |
| (Missing) | 359 (1.7%) |
| **Subjective financial status of family growing up** |  |
| Lived comfortably | 8,320 (41%) |
| Got by | 8,799 (43%) |
| Found it difficult | 2,398 (12%) |
| Found it very difficult | 973 (4.7%) |
| (Missing) | 52 (0.3%) |
| **Abuse** |  |
| Yes | 1,482 (7.2%) |
| No | 18,964 (92%) |
| (Missing) | 96 (0.5%) |
| **Outsider growing up** |  |
| Yes | 1,963 (9.6%) |
| No | 17,136 (83%) |
| (Missing) | 1,444 (7.0%) |
| **Self-rated health growing up** |  |
| Excellent | 2,711 (13%) |
| Very good | 7,106 (35%) |
| Good | 6,689 (33%) |
| Fair | 3,199 (16%) |
| Poor | 758 (3.7%) |
| (Missing) | 80 (0.4%) |
| **Age 12 religious service attendance** |  |
| At least 1/week | 398 (1.9%) |
| 1-3/month | 883 (4.3%) |
| <1/month | 5,023 (24%) |
| Never | 14,117 (69%) |
| (Missing) | 123 (0.6%) |
| **Religious affiliation at age 12** |  |
| Christianity | 343 (1.7%) |
| Islam | 7 (<0.1%) |
| Hinduism | 4 (<0.1%) |
| Buddhism | 6,536 (32%) |
| Judaism | 0 (0%) |
| Sikhism | 0 (0%) |
| Baha'i | 7 (<0.1%) |
| Jainism | 1 (<0.1%) |
| Shinto | 382 (1.9%) |
| Taoism | 14 (<0.1%) |
| Confucianism | 25 (0.1%) |
| Primal, Animist, or Folk religion | 13 (<0.1%) |
| Spiritism | 0 (0%) |
| Umbanda, Candomble, and other African-derived religions | 0 (0%) |
| Chinese folk/traditional religion | 0 (0%) |
| Some other religion | 46 (0.2%) |
| No religion/Atheist/Agnostic | 12,950 (63%) |
| (Missing) | 215 (1.0%) |
| 1n (%) | |

Table S11b. Means by demographic category for Japan

|  | | Life Evaluation | | | | Life Satisfaction | | | | Happiness | | | |
| --- | --- | --- | --- | --- | --- | --- | --- | --- | --- | --- | --- | --- | --- |
| Variable | Category | Mean | 95% CI | SE | Global p-value | Mean | 95% CI | SE | Global p-value | Mean | 95% CI | SE | Global p-value |
| Age group | 18-24 | 5.57 | (5.44,5.70) | 0.07 | < .001 | 5.75 | (5.60,5.89) | 0.07 | < .001 | 5.98 | (5.85,6.11) | 0.07 | < .001 |
|  | 25-29 | 5.57 | (5.40,5.73) | 0.08 |  | 5.63 | (5.45,5.81) | 0.09 |  | 5.94 | (5.78,6.11) | 0.08 |  |
|  | 30-39 | 5.49 | (5.40,5.59) | 0.05 |  | 5.64 | (5.54,5.74) | 0.05 |  | 5.90 | (5.80,5.99) | 0.05 |  |
|  | 40-49 | 5.49 | (5.40,5.58) | 0.05 |  | 5.58 | (5.48,5.67) | 0.05 |  | 5.80 | (5.71,5.89) | 0.05 |  |
|  | 50-59 | 5.68 | (5.60,5.75) | 0.04 |  | 5.72 | (5.63,5.80) | 0.04 |  | 5.90 | (5.82,5.97) | 0.04 |  |
|  | 60-69 | 6.21 | (6.14,6.28) | 0.04 |  | 6.36 | (6.29,6.44) | 0.04 |  | 6.46 | (6.39,6.53) | 0.04 |  |
|  | 70-79 | 6.70 | (6.63,6.77) | 0.04 |  | 6.93 | (6.86,7.00) | 0.04 |  | 6.96 | (6.90,7.03) | 0.03 |  |
|  | 80 or older | 6.95 | (6.74,7.15) | 0.10 |  | 7.20 | (6.98,7.42) | 0.11 |  | 7.14 | (6.94,7.34) | 0.10 |  |
| Gender | Male | 5.72 | (5.67,5.77) | 0.02 | < .001 | 5.82 | (5.77,5.87) | 0.03 | < .001 | 5.99 | (5.94,6.04) | 0.02 | < .001 |
|  | Female | 6.11 | (6.06,6.16) | 0.02 |  | 6.27 | (6.22,6.33) | 0.03 |  | 6.43 | (6.38,6.48) | 0.02 |  |
|  | Other | 5.63 | (4.82,6.44) | 0.39 |  | 5.92 | (4.95,6.89) | 0.47 |  | 5.56 | (4.54,6.59) | 0.49 |  |
| Marital status | Married | 6.31 | (6.27,6.36) | 0.02 | < .001 | 6.47 | (6.43,6.51) | 0.02 | < .001 | 6.60 | (6.56,6.64) | 0.02 | < .001 |
|  | Separated | 5.70 | (5.24,6.17) | 0.24 |  | 5.71 | (5.24,6.19) | 0.24 |  | 5.84 | (5.40,6.29) | 0.22 |  |
|  | Divorced | 5.53 | (5.41,5.66) | 0.06 |  | 5.69 | (5.55,5.83) | 0.07 |  | 5.83 | (5.71,5.96) | 0.06 |  |
|  | Widowed | 6.54 | (6.38,6.70) | 0.08 |  | 6.77 | (6.61,6.94) | 0.08 |  | 6.85 | (6.70,7.00) | 0.08 |  |
|  | Never | 5.04 | (4.98,5.11) | 0.03 |  | 5.09 | (5.02,5.16) | 0.03 |  | 5.35 | (5.29,5.41) | 0.03 |  |
|  | Domestic Partner | 5.37 | (4.92,5.81) | 0.22 |  | 5.66 | (5.13,6.19) | 0.27 |  | 6.07 | (5.60,6.55) | 0.24 |  |
| Employment | Employed for an employer | 5.75 | (5.70,5.80) | 0.03 | < .001 | 5.87 | (5.82,5.93) | 0.03 | < .001 | 6.05 | (6.00,6.10) | 0.03 | < .001 |
|  | Self-employed | 5.92 | (5.80,6.04) | 0.06 |  | 5.99 | (5.85,6.12) | 0.07 |  | 6.27 | (6.15,6.40) | 0.06 |  |
|  | Retired | 6.49 | (6.40,6.57) | 0.04 |  | 6.69 | (6.61,6.78) | 0.04 |  | 6.72 | (6.64,6.80) | 0.04 |  |
|  | Student | 6.08 | (5.90,6.26) | 0.09 |  | 6.25 | (6.04,6.45) | 0.10 |  | 6.29 | (6.11,6.48) | 0.09 |  |
|  | Homemaker | 6.39 | (6.27,6.50) | 0.06 |  | 6.54 | (6.42,6.66) | 0.06 |  | 6.68 | (6.56,6.79) | 0.06 |  |
|  | Unemployed and looking for a job | 4.24 | (4.06,4.41) | 0.09 |  | 4.27 | (4.08,4.46) | 0.10 |  | 4.65 | (4.47,4.83) | 0.09 |  |
|  | None of these/Other | 6.21 | (6.13,6.29) | 0.04 |  | 6.36 | (6.28,6.44) | 0.04 |  | 6.48 | (6.41,6.56) | 0.04 |  |
| Religious service attendance | More than 1/week | 6.91 | (6.66,7.16) | 0.13 | < .001 | 7.07 | (6.78,7.36) | 0.15 | < .001 | 7.13 | (6.85,7.40) | 0.14 | < .001 |
|  | 1/week | 6.94 | (6.71,7.17) | 0.12 |  | 7.05 | (6.80,7.30) | 0.13 |  | 7.14 | (6.90,7.37) | 0.12 |  |
|  | 1-3/month | 6.15 | (5.99,6.31) | 0.08 |  | 6.19 | (6.03,6.36) | 0.09 |  | 6.38 | (6.22,6.54) | 0.08 |  |
|  | A few times a year | 6.10 | (6.02,6.18) | 0.04 |  | 6.24 | (6.15,6.33) | 0.04 |  | 6.40 | (6.32,6.48) | 0.04 |  |
|  | Never | 5.83 | (5.80,5.87) | 0.02 |  | 5.97 | (5.93,6.01) | 0.02 |  | 6.13 | (6.10,6.17) | 0.02 |  |
| Education | Up to 8 years | 5.18 | (4.94,5.43) | 0.12 | < .001 | 5.28 | (5.03,5.54) | 0.13 | < .001 | 5.58 | (5.35,5.82) | 0.12 | < .001 |
|  | 9-15 years | 5.80 | (5.76,5.84) | 0.02 |  | 5.95 | (5.90,5.99) | 0.02 |  | 6.12 | (6.08,6.16) | 0.02 |  |
|  | 16+ years | 6.37 | (6.30,6.43) | 0.03 |  | 6.47 | (6.40,6.54) | 0.04 |  | 6.59 | (6.52,6.65) | 0.03 |  |
| Immigration status | Born in this country | 5.92 | (5.89,5.96) | 0.02 | 0.594 | 6.06 | (6.02,6.09) | 0.02 | 0.414 | 6.22 | (6.18,6.25) | 0.02 | 0.474 |
|  | Born in another country | 6.02 | (5.63,6.40) | 0.19 |  | 6.20 | (5.81,6.59) | 0.20 |  | 6.10 | (5.75,6.45) | 0.18 |  |
| Religious affiliation | Christianity | 6.69 | (6.46,6.93) | 0.12 | < .001 | 6.79 | (6.54,7.04) | 0.13 | < .001 | 7.00 | (6.77,7.23) | 0.12 | < .001 |
|  | Islam | 6.05 | * | * |  | 5.41 | * | * |  | 6.01 | * | * |  |
|  | Hinduism | 6.07 | * | * |  | 8.62 | * | * |  | 6.37 | * | * |  |
|  | Buddhism | 6.24 | (6.18,6.30) | 0.03 |  | 6.38 | (6.32,6.44) | 0.03 |  | 6.49 | (6.44,6.55) | 0.03 |  |
|  | Judaism | 6.88 | * | * |  | 5.75 | * | * |  | 6.74 | * | * |  |
|  | Sikhism | 6.65 | * | * |  | 6.00 | * | * |  | 6.67 | * | * |  |
|  | Baha'i | 5.25 | * | * |  | 4.68 | * | * |  | 5.00 | * | * |  |
|  | Jainism | 6.57 | (5.52,7.61) | 0.51 |  | 8.27 | (6.97,9.57) | 0.64 |  | 6.39 | (4.63,8.16) | 0.87 |  |
|  | Shinto | 6.15 | (5.92,6.37) | 0.11 |  | 6.20 | (5.95,6.44) | 0.13 |  | 6.40 | (6.18,6.63) | 0.11 |  |
|  | Taoism | 6.90 | * | * |  | 7.12 | * | * |  | 7.30 | * | * |  |
|  | Confucianism | 7.10 | (4.93,9.28) | 0.42 |  | 6.53 | (3.59,9.48) | 0.53 |  | 6.55 | (3.34,9.77) | 0.55 |  |
|  | Primal, Animist, or Folk religion | 6.68 | (4.96,8.39) | 0.54 |  | 6.99 | (5.13,8.84) | 0.57 |  | 6.80 | (5.03,8.56) | 0.55 |  |
|  | Some other religion | 4.94 | (3.82,6.06) | 0.55 |  | 5.07 | (3.88,6.26) | 0.58 |  | 5.96 | (5.25,6.67) | 0.35 |  |
|  | No religion/Atheist/Agnostic | 5.72 | (5.68,5.76) | 0.02 |  | 5.86 | (5.81,5.90) | 0.02 |  | 6.04 | (5.99,6.08) | 0.02 |  |

Table S11c. Childhood predictors regression analysis results for Japan

|  | | Life Evaluation | | | | Life Satisfaction | | | | Happiness | | | |
| --- | --- | --- | --- | --- | --- | --- | --- | --- | --- | --- | --- | --- | --- |
| Variable | Category | Est | 95% CI | SE | Global p-value | Est | 95% CI | SE | Global p-value | Est | 95% CI | SE | Global p-value |
| Relationship with mother | (Ref: Very bad/somewhat bad) |  |  |  | 0.174 |  |  |  | 0.022 |  |  |  | <.001 |
|  | Very good/somewhat good | 0.06 | (-0.03, 0.16) | 0.05 |  | 0.12 | (0.01, 0.23) | 0.05 |  | 0.22 | (0.12, 0.31) | 0.05 |  |
| Relationship with father | (Ref: Very bad/somewhat bad) |  |  |  | <.001 |  |  |  | <.001 |  |  |  | <.001 |
|  | Very good/somewhat good | 0.39 | (0.31, 0.48) | 0.04 |  | 0.41 | (0.32, 0.51) | 0.05 |  | 0.33 | (0.25, 0.42) | 0.04 |  |
| Parent marital status | (Ref: Parents married) |  |  |  | 0.148 |  |  |  | 0.067 |  |  |  | 0.003 |
|  | Divorced | 0.15 | (-0.01, 0.30) | 0.08 |  | 0.17 | (0.00, 0.35) | 0.09 |  | 0.27 | (0.11, 0.43) | 0.08 |  |
|  | Parents were never married | -0.03 | (-0.22, 0.17) | 0.10 |  | -0.05 | (-0.26, 0.16) | 0.11 |  | -0.11 | (-0.30, 0.08) | 0.10 |  |
|  | One or both parents had died | 0.12 | (-0.07, 0.31) | 0.09 |  | 0.17 | (-0.02, 0.35) | 0.10 |  | 0.10 | (-0.08, 0.28) | 0.09 |  |
| Subjective financial status of family growing up | (Ref: Got by) |  |  |  | <.001 |  |  |  | <.001 |  |  |  | <.001 |
|  | Lived comfortably | 0.44 | (0.37, 0.52) | 0.04 |  | 0.44 | (0.36, 0.51) | 0.04 |  | 0.42 | (0.35, 0.49) | 0.04 |  |
|  | Found it difficult | -0.22 | (-0.32, -0.11) | 0.06 |  | -0.21 | (-0.32, -0.09) | 0.06 |  | -0.17 | (-0.27, -0.06) | 0.05 |  |
|  | Found it very difficult | -0.69 | (-0.88, -0.51) | 0.10 |  | -0.70 | (-0.90, -0.49) | 0.10 |  | -0.57 | (-0.77, -0.38) | 0.10 |  |
| Abuse | (Ref: No) |  |  |  | <.001 |  |  |  | 0.002 |  |  |  | 0.008 |
|  | Yes | -0.25 | (-0.40, -0.10) | 0.07 |  | -0.26 | (-0.42, -0.10) | 0.08 |  | -0.20 | (-0.35, -0.05) | 0.08 |  |
| Outsider growing up | (Ref: No) |  |  |  | 0.307 |  |  |  | 0.344 |  |  |  | 0.023 |
|  | Yes | -0.06 | (-0.20, 0.07) | 0.07 |  | -0.06 | (-0.20, 0.08) | 0.07 |  | -0.14 | (-0.28, -0.01) | 0.07 |  |
| Self-rated health growing up | (Ref: Good) |  |  |  | <.001 |  |  |  | <.001 |  |  |  | <.001 |
|  | Excellent | 0.98 | (0.86, 1.09) | 0.06 |  | 1.10 | (0.98, 1.22) | 0.06 |  | 1.10 | (0.99, 1.21) | 0.06 |  |
|  | Very good | 0.46 | (0.39, 0.54) | 0.04 |  | 0.51 | (0.43, 0.59) | 0.04 |  | 0.50 | (0.43, 0.57) | 0.04 |  |
|  | Fair | -0.47 | (-0.57, -0.38) | 0.05 |  | -0.51 | (-0.61, -0.40) | 0.05 |  | -0.47 | (-0.57, -0.37) | 0.05 |  |
|  | Poor | -0.91 | (-1.12, -0.70) | 0.11 |  | -0.95 | (-1.18, -0.72) | 0.12 |  | -0.85 | (-1.06, -0.64) | 0.11 |  |
| Immigration status | (Ref: Born in this country) |  |  |  | 0.027 |  |  |  | 0.016 |  |  |  | 0.245 |
|  | Born in another country | 0.39 | (0.02, 0.77) | 0.19 |  | 0.42 | (0.06, 0.78) | 0.18 |  | 0.20 | (-0.16, 0.57) | 0.19 |  |
| Age 12 religious service attendance | (Ref: Never) |  |  |  | <.001 |  |  |  | <.001 |  |  |  | <.001 |
|  | At least 1/week | 0.32 | (0.07, 0.57) | 0.13 |  | 0.26 | (-0.01, 0.53) | 0.14 |  | 0.36 | (0.13, 0.59) | 0.12 |  |
|  | 1-3/month | 0.60 | (0.45, 0.75) | 0.08 |  | 0.54 | (0.38, 0.70) | 0.08 |  | 0.56 | (0.41, 0.71) | 0.08 |  |
|  | < 1/month | 0.13 | (0.06, 0.21) | 0.04 |  | 0.14 | (0.06, 0.22) | 0.04 |  | 0.17 | (0.09, 0.24) | 0.04 |  |
| Year of birth | (Ref: 1998-2005; current age: 18-24) |  |  |  | <.001 |  |  |  | <.001 |  |  |  | <.001 |
|  | 1993-1998; age 25-29 | 0.06 | (-0.13, 0.25) | 0.10 |  | -0.07 | (-0.28, 0.14) | 0.11 |  | 0.01 | (-0.18, 0.20) | 0.10 |  |
|  | 1983-1993; age 30-39 | 0.02 | (-0.13, 0.17) | 0.08 |  | -0.00 | (-0.16, 0.16) | 0.08 |  | 0.02 | (-0.13, 0.17) | 0.08 |  |
|  | 1973-1983; age 40-49 | -0.01 | (-0.16, 0.14) | 0.08 |  | -0.09 | (-0.25, 0.07) | 0.08 |  | -0.11 | (-0.26, 0.03) | 0.08 |  |
|  | 1963-1973; age 50-59 | 0.21 | (0.07, 0.35) | 0.07 |  | 0.08 | (-0.07, 0.24) | 0.08 |  | 0.01 | (-0.13, 0.15) | 0.07 |  |
|  | 1953-1963; age 60-69 | 0.65 | (0.51, 0.78) | 0.07 |  | 0.63 | (0.47, 0.78) | 0.08 |  | 0.48 | (0.34, 0.61) | 0.07 |  |
|  | 1943-1953; age 70-79 | 1.07 | (0.93, 1.21) | 0.07 |  | 1.12 | (0.97, 1.27) | 0.08 |  | 0.91 | (0.77, 1.04) | 0.07 |  |
|  | 1943 or earlier; age 80+ | 1.37 | (1.13, 1.60) | 0.12 |  | 1.45 | (1.19, 1.70) | 0.13 |  | 1.15 | (0.92, 1.38) | 0.12 |  |
| Gender | (Ref: Male) |  |  |  | <.001 |  |  |  | <.001 |  |  |  | <.001 |
|  | Female | 0.32 | (0.26, 0.38) | 0.03 |  | 0.38 | (0.32, 0.45) | 0.03 |  | 0.38 | (0.32, 0.44) | 0.03 |  |
|  | Other | 0.79 | (0.01, 1.57) | 0.40 |  | 1.09 | (0.13, 2.05) | 0.49 |  | 0.42 | (-0.60, 1.43) | 0.52 |  |
| Religious affiliation | (Ref: No religion/Atheist/Agnostic) |  |  |  | <.001 |  |  |  | <.001 |  |  |  | 0.009 |
|  | Buddhism | 0.16 | (0.09, 0.23) | 0.04 |  | 0.14 | (0.06, 0.22) | 0.04 |  | 0.10 | (0.03, 0.17) | 0.04 |  |
|  | Collapsed affiliations with prevalence<3% | 0.21 | (0.05, 0.37) | 0.08 |  | 0.15 | (-0.03, 0.33) | 0.09 |  | 0.12 | (-0.04, 0.28) | 0.08 |  |
| Race/ethnicity | (Ref: Plurality group) |  |  |  |  |  |  |  |  |  |  |  |  |

Table S11d. Sensitivity to unmeasured confounding of childhood predictors in Japan

|  | | Life Evaluation | | Life Satisfaction | | Happiness | |
| --- | --- | --- | --- | --- | --- | --- | --- |
| Variable | Category | E-value for Estimate | E-value for 95% CI | E-value for Estimate | E-value for 95% CI | E-value for Estimate | E-value for 95% CI |
| Relationship with mother | (Ref: Very bad/somewhat bad) |  |  |  |  |  |  |
|  | Very good/somewhat good | 1.20 | 1.00 | 1.27 | 1.07 | 1.42 | 1.29 |
| Relationship with father | (Ref: Very bad/somewhat bad) |  |  |  |  |  |  |
|  | Very good/somewhat good | 1.64 | 1.54 | 1.63 | 1.52 | 1.57 | 1.46 |
| Parent marital status | (Ref: Parents married) |  |  |  |  |  |  |
|  | Divorced | 1.33 | 1.00 | 1.35 | 1.04 | 1.50 | 1.28 |
|  | Parents were never married | 1.12 | 1.00 | 1.16 | 1.00 | 1.27 | 1.00 |
|  | One or both parents had died | 1.29 | 1.00 | 1.34 | 1.00 | 1.26 | 1.00 |
| Subjective financial status of family growing up | (Ref: Got by) |  |  |  |  |  |  |
|  | Lived comfortably | 1.71 | 1.62 | 1.66 | 1.57 | 1.68 | 1.60 |
|  | Found it difficult | 1.42 | 1.27 | 1.39 | 1.24 | 1.35 | 1.19 |
|  | Found it very difficult | 2.02 | 1.78 | 1.96 | 1.72 | 1.87 | 1.63 |
| Abuse | (Ref: No) |  |  |  |  |  |  |
|  | Yes | 1.47 | 1.26 | 1.45 | 1.24 | 1.40 | 1.17 |
| Outsider growing up | (Ref: No) |  |  |  |  |  |  |
|  | Yes | 1.20 | 1.00 | 1.19 | 1.00 | 1.32 | 1.08 |
| Self-rated health growing up | (Ref: Good) |  |  |  |  |  |  |
|  | Excellent | 2.40 | 2.24 | 2.46 | 2.30 | 2.57 | 2.41 |
|  | Very good | 1.73 | 1.64 | 1.75 | 1.66 | 1.78 | 1.69 |
|  | Fair | 1.74 | 1.62 | 1.74 | 1.62 | 1.74 | 1.62 |
|  | Poor | 2.30 | 2.02 | 2.26 | 1.99 | 2.23 | 1.95 |
| Immigration status | (Ref: Born in this country) |  |  |  |  |  |  |
|  | Born in another country | 1.65 | 1.11 | 1.64 | 1.18 | 1.41 | 1.00 |
| Age 12 religious service attendance | (Ref: Never) |  |  |  |  |  |  |
|  | At least 1/week | 1.56 | 1.21 | 1.45 | 1.00 | 1.61 | 1.30 |
|  | 1-3/month | 1.90 | 1.71 | 1.78 | 1.59 | 1.85 | 1.66 |
|  | < 1/month | 1.30 | 1.19 | 1.30 | 1.19 | 1.35 | 1.25 |
| Year of birth | (Ref: 1998-2005; current age: 18-24) |  |  |  |  |  |  |
|  | 1993-1998; age 25-29 | 1.19 | 1.00 | 1.19 | 1.00 | 1.07 | 1.00 |
|  | 1983-1993; age 30-39 | 1.11 | 1.00 | 1.01 | 1.00 | 1.10 | 1.00 |
|  | 1973-1983; age 40-49 | 1.08 | 1.00 | 1.23 | 1.00 | 1.28 | 1.00 |
|  | 1963-1973; age 50-59 | 1.41 | 1.20 | 1.22 | 1.00 | 1.08 | 1.00 |
|  | 1953-1963; age 60-69 | 1.96 | 1.79 | 1.88 | 1.70 | 1.75 | 1.58 |
|  | 1943-1953; age 70-79 | 2.53 | 2.33 | 2.48 | 2.29 | 2.31 | 2.12 |
|  | 1943 or earlier; age 80+ | 2.97 | 2.62 | 2.93 | 2.58 | 2.65 | 2.32 |
| Gender | (Ref: Male) |  |  |  |  |  |  |
|  | Female | 1.55 | 1.47 | 1.60 | 1.52 | 1.63 | 1.55 |
|  | Other | 2.15 | 1.07 | 2.44 | 1.29 | 1.68 | 1.00 |
| Religious affiliation | (Ref: No religion/Atheist/Agnostic) |  |  |  |  |  |  |
|  | Buddhism | 1.34 | 1.23 | 1.30 | 1.18 | 1.26 | 1.14 |
|  | Collapsed affiliations with prevalence<3% | 1.41 | 1.17 | 1.31 | 1.00 | 1.29 | 1.00 |
| Race/ethnicity | (Ref: Plurality group) |  |  |  |  |  |  |

Table S11e. Complete-case supplemental analysis of means by demographic category for Japan

|  | | Life Evaluation | | | | Life Satisfaction | | | | Happiness | | | |
| --- | --- | --- | --- | --- | --- | --- | --- | --- | --- | --- | --- | --- | --- |
| Variable | Category | Mean | 95% CI | SE | Global p-value | Mean | 95% CI | SE | Global p-value | Mean | 95% CI | SE | Global p-value |
| Age group | 18-24 | 5.77 | (5.64,5.89) | 0.06 | < .001 | 6.03 | (5.90,6.15) | 0.06 | < .001 | 6.16 | (6.04,6.29) | 0.06 | < .001 |
|  | 25-29 | 5.74 | (5.58,5.89) | 0.08 |  | 5.93 | (5.77,6.09) | 0.08 |  | 6.10 | (5.94,6.26) | 0.08 |  |
|  | 30-39 | 5.65 | (5.56,5.74) | 0.05 |  | 5.91 | (5.82,6.01) | 0.05 |  | 6.07 | (5.98,6.16) | 0.05 |  |
|  | 40-49 | 5.68 | (5.59,5.76) | 0.04 |  | 5.85 | (5.76,5.94) | 0.04 |  | 5.97 | (5.88,6.06) | 0.04 |  |
|  | 50-59 | 5.82 | (5.75,5.89) | 0.04 |  | 5.95 | (5.88,6.03) | 0.04 |  | 6.04 | (5.97,6.12) | 0.04 |  |
|  | 60-69 | 6.29 | (6.23,6.36) | 0.03 |  | 6.49 | (6.42,6.56) | 0.04 |  | 6.53 | (6.47,6.60) | 0.03 |  |
|  | 70-79 | 6.73 | (6.67,6.80) | 0.03 |  | 6.98 | (6.92,7.05) | 0.03 |  | 6.99 | (6.93,7.05) | 0.03 |  |
|  | 80 or older | 7.00 | (6.80,7.19) | 0.10 |  | 7.24 | (7.03,7.45) | 0.11 |  | 7.15 | (6.95,7.35) | 0.10 |  |
| Gender | Female | 6.22 | (6.18,6.27) | 0.02 | < .001 | 6.46 | (6.41,6.51) | 0.02 | < .001 | 6.53 | (6.48,6.57) | 0.02 | < .001 |
|  | Male | 5.87 | (5.82,5.91) | 0.02 |  | 6.04 | (6.00,6.09) | 0.02 |  | 6.14 | (6.09,6.18) | 0.02 |  |
|  | Other | 5.87 | (5.11,6.64) | 0.37 |  | 6.20 | (5.26,7.14) | 0.45 |  | 5.97 | (5.04,6.90) | 0.45 |  |
| Marital status | Divorced | 5.70 | (5.58,5.81) | 0.06 | < .001 | 5.95 | (5.83,6.08) | 0.06 | < .001 | 5.98 | (5.87,6.10) | 0.06 | < .001 |
|  | Domestic partner | 5.56 | (5.14,5.97) | 0.21 |  | 6.06 | (5.58,6.54) | 0.24 |  | 6.19 | (5.72,6.66) | 0.24 |  |
|  | Married | 6.38 | (6.34,6.42) | 0.02 |  | 6.58 | (6.53,6.62) | 0.02 |  | 6.66 | (6.62,6.70) | 0.02 |  |
|  | Separated | 5.96 | (5.54,6.39) | 0.22 |  | 6.01 | (5.58,6.44) | 0.22 |  | 6.06 | (5.66,6.45) | 0.20 |  |
|  | Single/Never been married | 5.27 | (5.21,5.33) | 0.03 |  | 5.47 | (5.41,5.53) | 0.03 |  | 5.59 | (5.53,5.65) | 0.03 |  |
|  | Widowed | 6.62 | (6.47,6.77) | 0.08 |  | 6.83 | (6.68,6.99) | 0.08 |  | 6.89 | (6.75,7.04) | 0.07 |  |
| Employment | Employed for an employer | 5.87 | (5.82,5.92) | 0.02 | < .001 | 6.07 | (6.02,6.11) | 0.02 | < .001 | 6.17 | (6.12,6.22) | 0.02 | < .001 |
|  | Homemaker | 6.49 | (6.38,6.59) | 0.05 |  | 6.70 | (6.59,6.82) | 0.06 |  | 6.75 | (6.64,6.86) | 0.05 |  |
|  | None of these/Other | 6.34 | (6.26,6.41) | 0.04 |  | 6.56 | (6.49,6.64) | 0.04 |  | 6.59 | (6.52,6.66) | 0.04 |  |
|  | Retired | 6.53 | (6.45,6.61) | 0.04 |  | 6.76 | (6.68,6.84) | 0.04 |  | 6.74 | (6.67,6.82) | 0.04 |  |
|  | Self-employed | 6.07 | (5.96,6.18) | 0.06 |  | 6.23 | (6.11,6.35) | 0.06 |  | 6.42 | (6.30,6.53) | 0.06 |  |
|  | Student | 6.19 | (6.03,6.35) | 0.08 |  | 6.45 | (6.27,6.62) | 0.09 |  | 6.44 | (6.28,6.60) | 0.08 |  |
|  | Unemployed and looking for a job | 4.70 | (4.54,4.86) | 0.08 |  | 4.99 | (4.82,5.16) | 0.09 |  | 5.15 | (4.99,5.30) | 0.08 |  |
| Religious service attendance | A few times a year | 6.17 | (6.09,6.25) | 0.04 | < .001 | 6.35 | (6.27,6.43) | 0.04 | < .001 | 6.45 | (6.38,6.53) | 0.04 | < .001 |
|  | More than once a week | 6.94 | (6.70,7.18) | 0.12 |  | 7.24 | (6.98,7.49) | 0.13 |  | 7.20 | (6.94,7.45) | 0.13 |  |
|  | Never | 5.98 | (5.94,6.01) | 0.02 |  | 6.20 | (6.16,6.24) | 0.02 |  | 6.27 | (6.24,6.31) | 0.02 |  |
|  | Once a week | 6.98 | (6.75,7.21) | 0.12 |  | 7.12 | (6.88,7.37) | 0.13 |  | 7.19 | (6.97,7.41) | 0.11 |  |
|  | One to three times a month | 6.28 | (6.13,6.42) | 0.08 |  | 6.33 | (6.18,6.49) | 0.08 |  | 6.47 | (6.32,6.62) | 0.08 |  |
| Education | Up to 8 years | 5.51 | (5.28,5.74) | 0.12 | < .001 | 5.73 | (5.49,5.97) | 0.12 | < .001 | 5.87 | (5.65,6.09) | 0.11 | < .001 |
|  | 16+ years | 6.45 | (6.39,6.51) | 0.03 |  | 6.62 | (6.56,6.69) | 0.03 |  | 6.68 | (6.62,6.74) | 0.03 |  |
|  | 9 to 15 years | 5.93 | (5.90,5.97) | 0.02 |  | 6.16 | (6.12,6.19) | 0.02 |  | 6.24 | (6.20,6.28) | 0.02 |  |
| Immigration status | Born in another country | 6.19 | (5.83,6.55) | 0.18 | 0.435 | 6.33 | (5.97,6.70) | 0.18 | 0.680 | 6.23 | (5.91,6.55) | 0.16 | 0.499 |
|  | Born in this country | 6.05 | (6.02,6.08) | 0.02 |  | 6.26 | (6.23,6.29) | 0.02 |  | 6.34 | (6.31,6.37) | 0.02 |  |
| Religious affiliation | Buddhism | 6.33 | (6.28,6.38) | 0.03 | < .001 | 6.53 | (6.48,6.59) | 0.03 | < .001 | 6.57 | (6.52,6.62) | 0.03 | < .001 |
|  | Christianity | 6.77 | (6.54,6.99) | 0.11 |  | 6.92 | (6.69,7.16) | 0.12 |  | 7.05 | (6.83,7.28) | 0.11 |  |
|  | Confucianism | 7.10 | (4.62,9.59) | 0.43 |  | 6.71 | (3.68,9.75) | 0.52 |  | 6.55 | (3.34,9.77) | 0.55 |  |
|  | Hinduism | 6.31 | * | * |  | 8.62 | * | * |  | 6.35 | * | * |  |
|  | Islam | 6.44 | * | * |  | 5.90 | * | * |  | 6.92 | * | * |  |
|  | Judaism | 7.26 | * | * |  | 5.88 | * | * |  | 6.74 | * | * |  |
|  | No religion/Atheist/Agnostic | 5.87 | (5.83,5.91) | 0.02 |  | 6.09 | (6.04,6.13) | 0.02 |  | 6.19 | (6.14,6.23) | 0.02 |  |
|  | Primal, Animist, or Folk religion | 6.68 | (4.89,8.47) | 0.55 |  | 6.99 | (5.13,8.84) | 0.57 |  | 6.81 | (5.01,8.61) | 0.55 |  |
|  | Sikhism | 6.89 | * | * |  | 6.21 | * | * |  | 6.65 | * | * |  |
|  | Some other religion | 5.75 | (4.96,6.54) | 0.39 |  | 6.13 | (5.32,6.94) | 0.40 |  | 6.06 | (5.36,6.75) | 0.34 |  |
|  | Taoism | 6.91 | * | * |  | 7.12 | * | * |  | 7.36 | * | * |  |
|  | Baha’i | 5.68 | * | * |  | 4.68 | * | * |  | 5.00 | * | * |  |
|  | Jainism | 6.57 | (5.52,7.61) | 0.51 |  | 8.27 | (6.97,9.57) | 0.64 |  | 6.39 | (4.63,8.16) | 0.87 |  |
|  | Shinto | 6.22 | (6.01,6.43) | 0.11 |  | 6.38 | (6.15,6.61) | 0.12 |  | 6.52 | (6.31,6.73) | 0.11 |  |

Table S11f. Complete-case supplemental analysis of childhood predictors regression analysis results for Japan

|  | | Life Evaluation | | | | Life Satisfaction | | | | Happiness | | | |
| --- | --- | --- | --- | --- | --- | --- | --- | --- | --- | --- | --- | --- | --- |
| Variable | Category | Est | 95% CI | SE | Global p-value | Est | 95% CI | SE | Global p-value | Est | 95% CI | SE | Global p-value |
| Relationship with mother | (Ref: Very bad/somewhat bad) |  |  |  | 0.549 |  |  |  | 0.051 |  |  |  | <.001 |
|  | Very good/somewhat good | 0.03 | (-0.06,0.12) | 0.05 |  | 0.09 | (-0.00,0.19) | 0.05 |  | 0.19 | (0.10,0.28) | 0.05 |  |
| Relationship with father | (Ref: Very bad/somewhat bad) |  |  |  | <.001 |  |  |  | <.001 |  |  |  | <.001 |
|  | Very good/somewhat good | 0.37 | (0.29,0.45) | 0.04 |  | 0.35 | (0.27,0.44) | 0.04 |  | 0.30 | (0.22,0.38) | 0.04 |  |
| Parent marital status | (Ref: Parents married) |  |  |  | 0.114 |  |  |  | 0.145 |  |  |  | 0.003 |
|  | No, one or both of them had died | -0.05 | (-0.26,0.16) | 0.11 |  | 0.04 | (-0.18,0.26) | 0.11 |  | -0.10 | (-0.31,0.11) | 0.11 |  |
|  | No, they were never married | -0.11 | (-0.33,0.11) | 0.11 |  | -0.14 | (-0.37,0.09) | 0.12 |  | -0.32 | (-0.54,-0.09) | 0.11 |  |
|  | Yes, married | -0.16 | (-0.30,-0.02) | 0.07 |  | -0.12 | (-0.28,0.03) | 0.08 |  | -0.25 | (-0.40,-0.10) | 0.08 |  |
| Subjective financial status of family growing up | (Ref: Got by) |  |  |  | <.001 |  |  |  | <.001 |  |  |  | <.001 |
|  | Found it difficult | -0.17 | (-0.27,-0.07) | 0.05 |  | -0.19 | (-0.29,-0.08) | 0.05 |  | -0.15 | (-0.24,-0.05) | 0.05 |  |
|  | Found it very difficult | -0.37 | (-0.54,-0.19) | 0.09 |  | -0.30 | (-0.49,-0.10) | 0.10 |  | -0.27 | (-0.45,-0.09) | 0.09 |  |
|  | Lived comfortably | 0.45 | (0.38,0.52) | 0.03 |  | 0.45 | (0.38,0.52) | 0.04 |  | 0.45 | (0.38,0.51) | 0.03 |  |
| Abuse | (Ref: No) |  |  |  | 0.002 |  |  |  | 0.017 |  |  |  | 0.018 |
|  | Yes | -0.21 | (-0.35,-0.08) | 0.07 |  | -0.18 | (-0.32,-0.03) | 0.07 |  | -0.17 | (-0.31,-0.03) | 0.07 |  |
| Outsider growing up | (Ref: No) |  |  |  | 0.174 |  |  |  | 0.321 |  |  |  | 0.766 |
|  | Yes | 0.08 | (-0.04,0.20) | 0.06 |  | 0.06 | (-0.06,0.19) | 0.06 |  | 0.02 | (-0.10,0.14) | 0.06 |  |
| Self-rated health growing up | (Ref: Good) |  |  |  | <.001 |  |  |  | <.001 |  |  |  | <.001 |
|  | Excellent | 0.98 | (0.88,1.09) | 0.05 |  | 1.10 | (0.99,1.21) | 0.06 |  | 1.10 | (1.00,1.21) | 0.05 |  |
|  | Fair | -0.45 | (-0.54,-0.36) | 0.05 |  | -0.42 | (-0.52,-0.32) | 0.05 |  | -0.41 | (-0.51,-0.32) | 0.05 |  |
|  | Poor | -0.59 | (-0.79,-0.39) | 0.10 |  | -0.61 | (-0.83,-0.40) | 0.11 |  | -0.53 | (-0.73,-0.33) | 0.10 |  |
|  | Very good | 0.47 | (0.40,0.54) | 0.04 |  | 0.49 | (0.42,0.56) | 0.04 |  | 0.51 | (0.44,0.58) | 0.04 |  |
| Immigration status | (Ref: Born in this country) |  |  |  | 0.044 |  |  |  | 0.069 |  |  |  | 0.466 |
|  | Born in another country | 0.35 | (0.01,0.69) | 0.17 |  | 0.31 | (-0.02,0.65) | 0.17 |  | 0.12 | (-0.21,0.45) | 0.17 |  |
| Age 12 religious service attendance | (Ref: Never) |  |  |  | <.001 |  |  |  | <.001 |  |  |  | <.001 |
|  | At least once a week | 0.31 | (0.08,0.55) | 0.12 |  | 0.27 | (0.03,0.51) | 0.12 |  | 0.35 | (0.13,0.57) | 0.11 |  |
|  | Less than once a month | 0.10 | (0.03,0.17) | 0.04 |  | 0.11 | (0.04,0.19) | 0.04 |  | 0.13 | (0.06,0.20) | 0.04 |  |
|  | One to three times a month | 0.51 | (0.37,0.65) | 0.07 |  | 0.42 | (0.27,0.57) | 0.08 |  | 0.47 | (0.33,0.61) | 0.07 |  |
| Year of birth | (Ref: 1998-2005; current age: 18-24) |  |  |  | <.001 |  |  |  | <.001 |  |  |  | <.001 |
|  | 1993-1998; age 25-29 | 0.04 | (-0.14,0.22) | 0.09 |  | -0.03 | (-0.21,0.15) | 0.09 |  | -0.01 | (-0.19,0.16) | 0.09 |  |
|  | 1983-1993; age 30-39 | -0.01 | (-0.15,0.13) | 0.07 |  | -0.00 | (-0.15,0.14) | 0.07 |  | 0.00 | (-0.13,0.14) | 0.07 |  |
|  | 1973-1983; age 40-49 | -0.00 | (-0.14,0.14) | 0.07 |  | -0.09 | (-0.23,0.05) | 0.07 |  | -0.12 | (-0.26,0.02) | 0.07 |  |
|  | 1963-1973; age 50-59 | 0.18 | (0.05,0.31) | 0.07 |  | 0.05 | (-0.09,0.19) | 0.07 |  | -0.01 | (-0.14,0.12) | 0.07 |  |
|  | 1953-1963; age 60-69 | 0.59 | (0.46,0.72) | 0.07 |  | 0.52 | (0.38,0.65) | 0.07 |  | 0.42 | (0.29,0.54) | 0.07 |  |
|  | 1943-1953; age 70-79 | 0.98 | (0.85,1.11) | 0.07 |  | 0.96 | (0.82,1.09) | 0.07 |  | 0.81 | (0.69,0.94) | 0.07 |  |
|  | 1943 or earlier; age 80+ | 1.28 | (1.06,1.50) | 0.11 |  | 1.26 | (1.02,1.49) | 0.12 |  | 1.02 | (0.80,1.24) | 0.11 |  |
| Gender | (Ref: Male) |  |  |  | <.001 |  |  |  | <.001 |  |  |  | <.001 |
|  | Male | -0.29 | (-0.35,-0.23) | 0.03 |  | -0.35 | (-0.41,-0.29) | 0.03 |  | -0.33 | (-0.39,-0.27) | 0.03 |  |
|  | Other | 0.45 | (-0.30,1.21) | 0.38 |  | 0.56 | (-0.36,1.48) | 0.47 |  | 0.23 | (-0.68,1.14) | 0.46 |  |
| Religious affiliation | (Ref: No religion/Atheist/Agnostic) |  |  |  | <.001 |  |  |  | <.001 |  |  |  | 0.019 |
|  | Buddhism | 0.14 | (0.08,0.21) | 0.03 |  | 0.15 | (0.08,0.22) | 0.03 |  | 0.09 | (0.03,0.16) | 0.03 |  |
|  | Collapsed affiliations with prevalence<3% | 0.18 | (0.02,0.34) | 0.08 |  | 0.14 | (-0.03,0.31) | 0.09 |  | 0.09 | (-0.06,0.25) | 0.08 |  |
| Race/ethnicity | (Ref: Plurality group) |  |  |  |  |  |  |  |  |  |  |  |  |

Table S11g. Complete-case supplemental analysis of sensitivity to unmeasured confounding of childhood predictors in Japan

|  | | Life Evaluation | | Life Satisfaction | | Happiness | |
| --- | --- | --- | --- | --- | --- | --- | --- |
| Variable | Category | E-value for Estimate | E-value for 95% CI | E-value for Estimate | E-value for 95% CI | E-value for Estimate | E-value for 95% CI |
| Relationship with mother | (Ref: Very bad/somewhat bad) |  |  |  |  |  |  |
|  | Very good/somewhat good | 1.12 | 1.00 | 1.25 | 1.00 | 1.40 | 1.27 |
| Relationship with father | (Ref: Very bad/somewhat bad) |  |  |  |  |  |  |
|  | Very good/somewhat good | 1.66 | 1.55 | 1.61 | 1.50 | 1.57 | 1.46 |
| Parent marital status | (Ref: Parents married) |  |  |  |  |  |  |
|  | No, one or both of them had died | 1.18 | 1.00 | 1.15 | 1.00 | 1.27 | 1.00 |
|  | No, they were never married | 1.29 | 1.00 | 1.32 | 1.00 | 1.58 | 1.26 |
|  | Yes, married | 1.36 | 1.10 | 1.30 | 1.00 | 1.50 | 1.28 |
| Subjective financial status of family growing up | (Ref: Got by) |  |  |  |  |  |  |
|  | Found it difficult | 1.38 | 1.22 | 1.39 | 1.24 | 1.34 | 1.17 |
|  | Found it very difficult | 1.65 | 1.41 | 1.54 | 1.27 | 1.52 | 1.25 |
|  | Lived comfortably | 1.76 | 1.67 | 1.74 | 1.65 | 1.76 | 1.67 |
| Abuse | (Ref: No) |  |  |  |  |  |  |
|  | Yes | 1.44 | 1.23 | 1.38 | 1.13 | 1.38 | 1.13 |
| Outsider growing up | (Ref: No) |  |  |  |  |  |  |
|  | Yes | 1.24 | 1.00 | 1.20 | 1.00 | 1.10 | 1.00 |
| Self-rated health growing up | (Ref: Good) |  |  |  |  |  |  |
|  | Excellent | 2.52 | 2.36 | 2.64 | 2.47 | 2.71 | 2.55 |
|  | Fair | 1.76 | 1.64 | 1.70 | 1.57 | 1.72 | 1.59 |
|  | Poor | 1.95 | 1.68 | 1.95 | 1.67 | 1.87 | 1.60 |
|  | Very good | 1.79 | 1.70 | 1.79 | 1.69 | 1.84 | 1.75 |
| Immigration status | (Ref: Born in this country) |  |  |  |  |  |  |
|  | Born in another country | 1.63 | 1.08 | 1.56 | 1.00 | 1.31 | 1.00 |
| Age 12 religious service attendance | (Ref: Never) |  |  |  |  |  |  |
|  | At least once a week | 1.58 | 1.23 | 1.50 | 1.13 | 1.63 | 1.32 |
|  | Less than once a month | 1.27 | 1.13 | 1.28 | 1.15 | 1.32 | 1.20 |
|  | One to three times a month | 1.84 | 1.65 | 1.70 | 1.51 | 1.79 | 1.60 |
| Year of birth | (Ref: 1998-2005; current age: 18-24) |  |  |  |  |  |  |
|  | 1993-1998; age 25-29 | 1.15 | 1.00 | 1.13 | 1.00 | 1.08 | 1.00 |
|  | 1983-1993; age 30-39 | 1.07 | 1.00 | 1.04 | 1.00 | 1.04 | 1.00 |
|  | 1973-1983; age 40-49 | 1.02 | 1.00 | 1.25 | 1.00 | 1.30 | 1.00 |
|  | 1963-1973; age 50-59 | 1.39 | 1.18 | 1.17 | 1.00 | 1.05 | 1.00 |
|  | 1953-1963; age 60-69 | 1.95 | 1.78 | 1.83 | 1.65 | 1.72 | 1.55 |
|  | 1943-1953; age 70-79 | 2.51 | 2.31 | 2.43 | 2.23 | 2.27 | 2.09 |
|  | 1943 or earlier; age 80+ | 3.00 | 2.63 | 2.88 | 2.52 | 2.59 | 2.25 |
| Gender | (Ref: Male) |  |  |  |  |  |  |
|  | Male | 1.54 | 1.46 | 1.61 | 1.53 | 1.60 | 1.52 |
|  | Other | 1.76 | 1.00 | 1.88 | 1.00 | 1.46 | 1.00 |
| Religious affiliation | (Ref: No religion/Atheist/Agnostic) |  |  |  |  |  |  |
|  | Buddhism | 1.34 | 1.23 | 1.34 | 1.23 | 1.26 | 1.12 |
|  | Collapsed affiliations with prevalence<3% | 1.39 | 1.11 | 1.32 | 1.00 | 1.26 | 1.00 |
| Race/ethnicity | (Ref: Plurality group) |  |  |  |  |  |  |

# Tables S12a-g: Kenya

Table S12a. Nationally representative descriptive statistics for Kenya

| **Characteristic** | **N = 11,389**1 |
| --- | --- |
| **Age group** |  |
| 1998-2005; age 18-24 | 2,868 (25%) |
| 1993-1998; age 25-29 | 2,035 (18%) |
| 1983-1993; age 30-39 | 2,564 (23%) |
| 1973-1983; age 40-49 | 1,708 (15%) |
| 1963-1973; age 50-59 | 1,072 (9.4%) |
| 1953-1963; age 60-69 | 710 (6.2%) |
| 1943-1953; age 70-79 | 360 (3.2%) |
| 1943 or earlier; age 80+ | 67 (0.6%) |
| (Missing) | 5 (<0.1%) |
| **Gender** |  |
| Male | 5,567 (49%) |
| Female | 5,813 (51%) |
| Other | 2 (<0.1%) |
| (Missing) | 7 (<0.1%) |
| **Race/Ethnicity** |  |
| Embu | 197 (1.7%) |
| Kalenjin | 1,377 (12%) |
| Kamba | 1,299 (11%) |
| Kenyan Somali/Somali | 396 (3.5%) |
| Kikuyu | 2,119 (19%) |
| Kisii | 789 (6.9%) |
| Luhya | 1,943 (17%) |
| Luo | 1,120 (9.8%) |
| Maasai | 237 (2.1%) |
| Meru | 630 (5.5%) |
| Miji Kenda tribes | 708 (6.2%) |
| Other | 548 (4.8%) |
| (Missing) | 27 (0.2%) |
| **Respondent Marital status** |  |
| Married | 6,626 (58%) |
| Separated | 467 (4.1%) |
| Divorced | 111 (1.0%) |
| Widowed | 464 (4.1%) |
| Single, never married | 3,531 (31%) |
| Domestic Partner | 146 (1.3%) |
| (Missing) | 43 (0.4%) |
| **Employment** |  |
| Employed for an employer | 1,467 (13%) |
| Self-employed | 3,630 (32%) |
| Retired | 319 (2.8%) |
| Student | 1,136 (10.0%) |
| Homemaker | 1,537 (13%) |
| Unemployed and looking for a job | 3,153 (28%) |
| None of these/Other | 138 (1.2%) |
| (Missing) | 9 (<0.1%) |
| **Religious service attendance as an adult (now)** |  |
| More than 1/week | 2,774 (24%) |
| 1/week | 6,063 (53%) |
| 1-3/month | 1,219 (11%) |
| A few times a year | 855 (7.5%) |
| Never | 465 (4.1%) |
| (Missing) | 13 (0.1%) |
| **Education (years)** |  |
| Up to 8 years | 4,485 (39%) |
| 9-15 years | 6,115 (54%) |
| 16+ years | 783 (6.9%) |
| (Missing) | 6 (<0.1%) |
| **Immigration status** |  |
| Born in this country | 11,270 (99%) |
| Born in another country | 117 (1.0%) |
| (Missing) | 2 (<0.1%) |
| **Religious affiliation as an adult (now)** |  |
| Christianity | 10,334 (91%) |
| Islam | 918 (8.1%) |
| Hinduism | 0 (0%) |
| Buddhism | 1 (<0.1%) |
| Judaism | 3 (<0.1%) |
| Sikhism | 0 (0%) |
| Baha'i | 1 (<0.1%) |
| Jainism | 1 (<0.1%) |
| Shinto | 0 (0%) |
| Taoism | 0 (0%) |
| Confucianism | 3 (<0.1%) |
| Primal, Animist, or Folk religion | 7 (<0.1%) |
| Spiritism | 0 (0%) |
| Umbanda, Candomble, and other African-derived religions | 0 (0%) |
| Chinese folk/traditional religion | 0 (0%) |
| Some other religion | 5 (<0.1%) |
| No religion/Atheist/Agnostic | 108 (0.9%) |
| (Missing) | 9 (<0.1%) |
| **Relationship with mother growing up** |  |
| Very good | 9,418 (83%) |
| Somewhat good | 1,435 (13%) |
| Somewhat bad | 130 (1.1%) |
| Very bad | 100 (0.9%) |
| Does not apply | 240 (2.1%) |
| (Missing) | 66 (0.6%) |
| **Relationship with father growing up** |  |
| Very good | 7,958 (70%) |
| Somewhat good | 1,896 (17%) |
| Somewhat bad | 216 (1.9%) |
| Very bad | 220 (1.9%) |
| Does not apply | 967 (8.5%) |
| (Missing) | 132 (1.2%) |
| **Parent marital status at age 12** |  |
| Parents married | 9,238 (81%) |
| Divorced | 697 (6.1%) |
| Parents were never married | 681 (6.0%) |
| One or both parents had died | 471 (4.1%) |
| (Missing) | 301 (2.6%) |
| **Subjective financial status of family growing up** |  |
| Lived comfortably | 3,026 (27%) |
| Got by | 3,279 (29%) |
| Found it difficult | 4,071 (36%) |
| Found it very difficult | 994 (8.7%) |
| (Missing) | 19 (0.2%) |
| **Abuse** |  |
| Yes | 1,300 (11%) |
| No | 10,039 (88%) |
| (Missing) | 49 (0.4%) |
| **Outsider growing up** |  |
| Yes | 1,223 (11%) |
| No | 10,114 (89%) |
| (Missing) | 52 (0.5%) |
| **Self-rated health growing up** |  |
| Excellent | 4,449 (39%) |
| Very good | 2,598 (23%) |
| Good | 2,582 (23%) |
| Fair | 1,384 (12%) |
| Poor | 349 (3.1%) |
| (Missing) | 26 (0.2%) |
| **Age 12 religious service attendance** |  |
| At least 1/week | 9,189 (81%) |
| 1-3/month | 1,687 (15%) |
| <1/month | 236 (2.1%) |
| Never | 198 (1.7%) |
| (Missing) | 79 (0.7%) |
| **Religious affiliation at age 12** |  |
| Christianity | 10,369 (91%) |
| Islam | 916 (8.0%) |
| Hinduism | 0 (0%) |
| Buddhism | 5 (<0.1%) |
| Judaism | 6 (<0.1%) |
| Sikhism | 0 (<0.1%) |
| Baha'i | 3 (<0.1%) |
| Jainism | 1 (<0.1%) |
| Shinto | 0 (0%) |
| Taoism | 0 (0%) |
| Confucianism | 0 (0%) |
| Primal, Animist, or Folk religion | 13 (0.1%) |
| Spiritism | 0 (0%) |
| Umbanda, Candomble, and other African-derived religions | 0 (0%) |
| Chinese folk/traditional religion | 0 (0%) |
| Some other religion | 0 (<0.1%) |
| No religion/Atheist/Agnostic | 67 (0.6%) |
| (Missing) | 9 (<0.1%) |
| 1n (%) | |

Table S12b. Means by demographic category for Kenya

|  | | Life Evaluation | | | | Life Satisfaction | | | | Happiness | | | |
| --- | --- | --- | --- | --- | --- | --- | --- | --- | --- | --- | --- | --- | --- |
| Variable | Category | Mean | 95% CI | SE | Global p-value | Mean | 95% CI | SE | Global p-value | Mean | 95% CI | SE | Global p-value |
| Age group | 18-24 | 5.94 | (5.81,6.07) | 0.07 | < .001 | 6.21 | (6.06,6.36) | 0.07 | < .001 | 7.67 | (7.56,7.79) | 0.06 | < .001 |
|  | 25-29 | 5.67 | (5.50,5.83) | 0.08 |  | 6.03 | (5.86,6.21) | 0.09 |  | 7.32 | (7.17,7.46) | 0.07 |  |
|  | 30-39 | 5.38 | (5.21,5.55) | 0.09 |  | 5.76 | (5.60,5.92) | 0.08 |  | 7.18 | (7.06,7.31) | 0.06 |  |
|  | 40-49 | 5.06 | (4.84,5.29) | 0.11 |  | 5.45 | (5.22,5.69) | 0.12 |  | 6.88 | (6.67,7.09) | 0.11 |  |
|  | 50-59 | 5.30 | (5.00,5.59) | 0.15 |  | 5.99 | (5.69,6.29) | 0.15 |  | 7.03 | (6.76,7.30) | 0.14 |  |
|  | 60-69 | 5.28 | (4.90,5.66) | 0.19 |  | 6.55 | (6.11,6.99) | 0.23 |  | 7.15 | (6.80,7.49) | 0.18 |  |
|  | 70-79 | 5.37 | (4.71,6.04) | 0.34 |  | 6.23 | (5.61,6.85) | 0.32 |  | 7.25 | (6.71,7.79) | 0.27 |  |
|  | 80 or older | 5.24 | (3.80,6.68) | 0.72 |  | 6.94 | (5.66,8.22) | 0.64 |  | 7.56 | (6.20,8.92) | 0.68 |  |
| Gender | Male | 5.51 | (5.39,5.64) | 0.06 | 0.017 | 5.99 | (5.87,6.11) | 0.06 | 0.572 | 7.17 | (7.07,7.27) | 0.05 | 0.010 |
|  | Female | 5.51 | (5.38,5.63) | 0.06 |  | 5.95 | (5.82,6.07) | 0.06 |  | 7.37 | (7.26,7.48) | 0.06 |  |
|  | Other | 8.85 | * | * |  | 7.99 | * | * |  | 7.99 | * | * |  |
| Marital status | Married | 5.44 | (5.32,5.57) | 0.06 | < .001 | 5.99 | (5.87,6.11) | 0.06 | 0.006 | 7.29 | (7.18,7.40) | 0.06 | < .001 |
|  | Separated | 5.23 | (4.80,5.65) | 0.22 |  | 5.30 | (4.88,5.71) | 0.21 |  | 6.98 | (6.61,7.34) | 0.19 |  |
|  | Divorced | 4.88 | (4.28,5.49) | 0.31 |  | 5.59 | (4.90,6.27) | 0.34 |  | 6.58 | (5.93,7.24) | 0.33 |  |
|  | Widowed | 4.68 | (4.17,5.18) | 0.26 |  | 6.18 | (5.70,6.66) | 0.25 |  | 6.39 | (5.93,6.86) | 0.24 |  |
|  | Never | 5.79 | (5.67,5.91) | 0.06 |  | 6.02 | (5.89,6.15) | 0.07 |  | 7.43 | (7.32,7.54) | 0.06 |  |
|  | Domestic Partner | 5.71 | (5.13,6.29) | 0.29 |  | 5.62 | (5.03,6.21) | 0.30 |  | 7.05 | (6.42,7.69) | 0.32 |  |
| Employment | Employed for an employer | 5.69 | (5.48,5.89) | 0.11 | < .001 | 5.96 | (5.76,6.15) | 0.10 | < .001 | 7.12 | (6.95,7.29) | 0.09 | < .001 |
|  | Self-employed | 5.39 | (5.25,5.54) | 0.08 |  | 5.98 | (5.83,6.14) | 0.08 |  | 7.17 | (7.03,7.31) | 0.07 |  |
|  | Retired | 5.48 | (4.88,6.07) | 0.30 |  | 6.22 | (5.63,6.80) | 0.30 |  | 7.12 | (6.57,7.66) | 0.28 |  |
|  | Student | 6.03 | (5.85,6.22) | 0.09 |  | 6.23 | (6.01,6.45) | 0.11 |  | 7.58 | (7.41,7.75) | 0.09 |  |
|  | Homemaker | 5.51 | (5.28,5.73) | 0.11 |  | 6.29 | (6.05,6.53) | 0.12 |  | 7.48 | (7.26,7.69) | 0.11 |  |
|  | Unemployed and looking for a job | 5.38 | (5.21,5.55) | 0.09 |  | 5.69 | (5.52,5.86) | 0.09 |  | 7.29 | (7.16,7.43) | 0.07 |  |
|  | None of these/Other | 5.35 | (4.30,6.39) | 0.53 |  | 5.72 | (4.65,6.80) | 0.54 |  | 6.72 | (5.90,7.54) | 0.42 |  |
| Religious service attendance | More than 1/week | 5.44 | (5.28,5.60) | 0.08 | 0.609 | 5.97 | (5.79,6.15) | 0.09 | 0.827 | 7.20 | (7.04,7.37) | 0.08 | < .001 |
|  | 1/week | 5.56 | (5.43,5.68) | 0.06 |  | 6.00 | (5.87,6.13) | 0.07 |  | 7.41 | (7.31,7.52) | 0.05 |  |
|  | 1-3/month | 5.43 | (5.20,5.66) | 0.12 |  | 5.95 | (5.72,6.18) | 0.12 |  | 7.11 | (6.89,7.33) | 0.11 |  |
|  | A few times a year | 5.46 | (5.21,5.71) | 0.13 |  | 5.82 | (5.53,6.11) | 0.15 |  | 6.80 | (6.55,7.04) | 0.12 |  |
|  | Never | 5.62 | (5.24,5.99) | 0.19 |  | 5.87 | (5.46,6.28) | 0.21 |  | 7.22 | (6.88,7.55) | 0.17 |  |
| Education | Up to 8 years | 5.38 | (5.21,5.55) | 0.09 | 0.084 | 6.06 | (5.89,6.23) | 0.09 | 0.103 | 7.35 | (7.20,7.50) | 0.08 | 0.001 |
|  | 9-15 years | 5.59 | (5.48,5.69) | 0.05 |  | 5.93 | (5.83,6.03) | 0.05 |  | 7.27 | (7.18,7.36) | 0.05 |  |
|  | 16+ years | 5.63 | (5.38,5.88) | 0.13 |  | 5.75 | (5.48,6.01) | 0.14 |  | 6.85 | (6.62,7.08) | 0.12 |  |
| Immigration status | Born in this country | 5.51 | (5.41,5.61) | 0.05 | 0.817 | 5.97 | (5.87,6.07) | 0.05 | 0.471 | 7.27 | (7.19,7.36) | 0.04 | 0.705 |
|  | Born in another country | 5.43 | (4.72,6.14) | 0.36 |  | 5.70 | (4.98,6.43) | 0.37 |  | 7.16 | (6.56,7.76) | 0.30 |  |
| Religious affiliation | Christianity | 5.47 | (5.37,5.58) | 0.05 | < .001 | 5.95 | (5.84,6.05) | 0.05 | * | 7.28 | (7.20,7.37) | 0.05 | < .001 |
|  | Islam | 5.95 | (5.65,6.24) | 0.15 |  | 6.28 | (5.98,6.59) | 0.16 |  | 7.20 | (6.89,7.51) | 0.16 |  |
|  | Buddhism | 5.00 | * | * |  | 6.00 | * | * |  | 7.00 | * | * |  |
|  | Judaism | 4.50 | * | * |  | 10.00 | * | * |  | 5.84 | * | * |  |
|  | Baha'i | 10.00 | * | * |  | 10.00 | * | * |  | 10.00 | * | * |  |
|  | Jainism | 5.00 | * | * |  | 7.00 | * | * |  | 6.00 | * | * |  |
|  | Confucianism | 10.00 | * | * |  | 7.00 | * | * |  | 8.00 | * | * |  |
|  | Primal, Animist, or Folk religion | 4.12 | (1.12,7.11) | 1.50 |  | 4.50 | (2.05,6.96) | 1.23 |  | 5.53 | (3.13,7.92) | 1.20 |  |
|  | Some other religion | 6.70 | * | * |  | 6.25 | * | * |  | 7.26 | * | * |  |
|  | No religion/Atheist/Agnostic | 5.30 | (4.43,6.18) | 0.44 |  | 5.35 | (4.53,6.17) | 0.41 |  | 7.04 | (6.36,7.72) | 0.34 |  |
| Race/Ethnicity | Luhya | 5.42 | (5.14,5.70) | 0.14 | < .001 | 5.65 | (5.41,5.90) | 0.12 | < .001 | 7.26 | (7.07,7.44) | 0.09 | < .001 |
|  | Luo | 5.20 | (4.95,5.44) | 0.12 |  | 5.76 | (5.50,6.02) | 0.13 |  | 6.92 | (6.65,7.20) | 0.14 |  |
|  | Kalenjin | 5.81 | (5.63,6.00) | 0.10 |  | 6.20 | (5.93,6.47) | 0.14 |  | 7.66 | (7.48,7.84) | 0.09 |  |
|  | Kamba | 5.57 | (5.36,5.78) | 0.11 |  | 5.93 | (5.68,6.17) | 0.12 |  | 7.61 | (7.33,7.90) | 0.15 |  |
|  | Kikuyu | 5.37 | (5.13,5.62) | 0.12 |  | 6.01 | (5.77,6.26) | 0.13 |  | 7.08 | (6.90,7.26) | 0.09 |  |
|  | Kisii | 4.99 | (4.78,5.21) | 0.11 |  | 5.67 | (5.36,5.99) | 0.16 |  | 6.49 | (6.29,6.68) | 0.10 |  |
|  | Maasai | 6.45 | (5.91,6.99) | 0.28 |  | 6.97 | (6.43,7.51) | 0.27 |  | 8.16 | (7.56,8.76) | 0.30 |  |
|  | Meru | 5.73 | (5.43,6.04) | 0.16 |  | 6.38 | (5.95,6.82) | 0.22 |  | 7.51 | (7.08,7.95) | 0.22 |  |
|  | Kenyan Somali/Somali | 6.80 | (6.51,7.10) | 0.15 |  | 6.61 | (5.95,7.26) | 0.33 |  | 7.64 | (7.04,8.24) | 0.30 |  |
|  | Miji Kenda tribes | 5.34 | (4.94,5.73) | 0.20 |  | 5.98 | (5.73,6.24) | 0.13 |  | 7.21 | (6.94,7.49) | 0.14 |  |
|  | Embu | 5.57 | (5.23,5.92) | 0.17 |  | 5.49 | (4.93,6.05) | 0.28 |  | 7.02 | (6.59,7.46) | 0.22 |  |
|  | Other | 5.43 | (5.09,5.76) | 0.17 |  | 6.07 | (5.73,6.40) | 0.17 |  | 7.39 | (7.11,7.67) | 0.14 |  |

Table S12c. Childhood predictors regression analysis results for Kenya

|  | | Life Evaluation | | | | Life Satisfaction | | | | Happiness | | | |
| --- | --- | --- | --- | --- | --- | --- | --- | --- | --- | --- | --- | --- | --- |
| Variable | Category | Est | 95% CI | SE | Global p-value | Est | 95% CI | SE | Global p-value | Est | 95% CI | SE | Global p-value |
| Relationship with mother | (Ref: Very bad/somewhat bad) |  |  |  | 0.633 |  |  |  | 0.387 |  |  |  | 0.122 |
|  | Very good/somewhat good | 0.11 | (-0.39, 0.61) | 0.25 |  | 0.22 | (-0.32, 0.76) | 0.28 |  | 0.33 | (-0.10, 0.76) | 0.22 |  |
| Relationship with father | (Ref: Very bad/somewhat bad) |  |  |  | 0.215 |  |  |  | 0.168 |  |  |  | 0.132 |
|  | Very good/somewhat good | 0.24 | (-0.14, 0.62) | 0.19 |  | 0.27 | (-0.12, 0.65) | 0.20 |  | 0.27 | (-0.08, 0.62) | 0.18 |  |
| Parent marital status | (Ref: Parents married) |  |  |  | 0.167 |  |  |  | 0.003 |  |  |  | 0.003 |
|  | Divorced | -0.06 | (-0.42, 0.29) | 0.18 |  | -0.15 | (-0.47, 0.18) | 0.16 |  | -0.24 | (-0.53, 0.06) | 0.15 |  |
|  | Parents were never married | -0.17 | (-0.54, 0.21) | 0.19 |  | -0.54 | (-0.89, -0.19) | 0.18 |  | -0.45 | (-0.80, -0.11) | 0.18 |  |
|  | One or both parents had died | -0.42 | (-0.82, -0.02) | 0.20 |  | -0.31 | (-0.71, 0.09) | 0.20 |  | -0.42 | (-0.80, -0.04) | 0.19 |  |
| Subjective financial status of family growing up | (Ref: Got by) |  |  |  | <.001 |  |  |  | <.001 |  |  |  | 0.012 |
|  | Lived comfortably | 0.46 | (0.27, 0.66) | 0.10 |  | 0.26 | (0.06, 0.47) | 0.10 |  | 0.26 | (0.09, 0.43) | 0.09 |  |
|  | Found it difficult | -0.12 | (-0.31, 0.06) | 0.10 |  | -0.31 | (-0.50, -0.12) | 0.10 |  | 0.09 | (-0.08, 0.26) | 0.09 |  |
|  | Found it very difficult | -0.14 | (-0.45, 0.18) | 0.16 |  | -0.21 | (-0.57, 0.14) | 0.18 |  | -0.03 | (-0.31, 0.25) | 0.14 |  |
| Abuse | (Ref: No) |  |  |  | 0.161 |  |  |  | 0.004 |  |  |  | <.001 |
|  | Yes | -0.16 | (-0.38, 0.06) | 0.11 |  | -0.38 | (-0.64, -0.13) | 0.13 |  | -0.39 | (-0.62, -0.17) | 0.11 |  |
| Outsider growing up | (Ref: No) |  |  |  | 0.701 |  |  |  | 0.060 |  |  |  | 0.722 |
|  | Yes | 0.04 | (-0.20, 0.29) | 0.13 |  | -0.26 | (-0.54, 0.01) | 0.14 |  | -0.05 | (-0.31, 0.22) | 0.14 |  |
| Self-rated health growing up | (Ref: Good) |  |  |  | 0.040 |  |  |  | 0.003 |  |  |  | 0.004 |
|  | Excellent | 0.23 | (0.01, 0.44) | 0.11 |  | 0.08 | (-0.13, 0.29) | 0.11 |  | 0.21 | (0.03, 0.39) | 0.09 |  |
|  | Very good | 0.25 | (0.03, 0.48) | 0.12 |  | 0.08 | (-0.15, 0.30) | 0.12 |  | 0.15 | (-0.05, 0.35) | 0.10 |  |
|  | Fair | -0.03 | (-0.32, 0.26) | 0.15 |  | -0.24 | (-0.51, 0.03) | 0.14 |  | -0.08 | (-0.32, 0.15) | 0.12 |  |
|  | Poor | -0.18 | (-0.73, 0.37) | 0.28 |  | -0.62 | (-1.18, -0.06) | 0.29 |  | -0.55 | (-1.08, -0.03) | 0.27 |  |
| Immigration status | (Ref: Born in this country) |  |  |  | 0.737 |  |  |  | 0.673 |  |  |  | 0.776 |
|  | Born in another country | -0.12 | (-0.83, 0.58) | 0.36 |  | -0.15 | (-0.83, 0.53) | 0.35 |  | -0.09 | (-0.68, 0.51) | 0.30 |  |
| Age 12 religious service attendance | (Ref: Never) |  |  |  | 0.362 |  |  |  | 0.021 |  |  |  | 0.502 |
|  | At least 1/week | 0.30 | (-0.39, 1.00) | 0.35 |  | -0.47 | (-1.15, 0.20) | 0.35 |  | -0.47 | (-1.08, 0.14) | 0.31 |  |
|  | 1-3/month | 0.46 | (-0.29, 1.20) | 0.38 |  | -0.55 | (-1.30, 0.19) | 0.38 |  | -0.48 | (-1.13, 0.18) | 0.34 |  |
|  | < 1/month | 0.50 | (-0.29, 1.29) | 0.40 |  | -1.17 | (-1.98, -0.37) | 0.41 |  | -0.46 | (-1.18, 0.26) | 0.37 |  |
| Year of birth | (Ref: 1998-2005; current age: 18-24) |  |  |  | <.001 |  |  |  | <.001 |  |  |  | <.001 |
|  | 1993-1998; age 25-29 | -0.23 | (-0.42, -0.05) | 0.10 |  | -0.14 | (-0.37, 0.09) | 0.12 |  | -0.32 | (-0.50, -0.15) | 0.09 |  |
|  | 1983-1993; age 30-39 | -0.47 | (-0.67, -0.27) | 0.10 |  | -0.36 | (-0.58, -0.15) | 0.11 |  | -0.44 | (-0.61, -0.28) | 0.08 |  |
|  | 1973-1983; age 40-49 | -0.77 | (-1.03, -0.51) | 0.13 |  | -0.68 | (-0.93, -0.43) | 0.13 |  | -0.74 | (-0.97, -0.51) | 0.12 |  |
|  | 1963-1973; age 50-59 | -0.52 | (-0.82, -0.23) | 0.15 |  | -0.16 | (-0.51, 0.18) | 0.18 |  | -0.58 | (-0.89, -0.26) | 0.16 |  |
|  | 1953-1963; age 60-69 | -0.55 | (-0.95, -0.15) | 0.20 |  | 0.36 | (-0.11, 0.82) | 0.24 |  | -0.50 | (-0.87, -0.13) | 0.19 |  |
|  | 1943-1953; age 70-79 | -0.44 | (-1.11, 0.22) | 0.34 |  | -0.03 | (-0.64, 0.58) | 0.31 |  | -0.42 | (-0.98, 0.14) | 0.28 |  |
|  | 1943 or earlier; age 80+ | -0.69 | (-2.12, 0.73) | 0.73 |  | 0.59 | (-0.63, 1.82) | 0.63 |  | -0.05 | (-1.34, 1.25) | 0.66 |  |
| Gender | (Ref: Male) |  |  |  | 0.003 |  |  |  | 0.522 |  |  |  | 0.008 |
|  | Female | 0.03 | (-0.12, 0.19) | 0.08 |  | -0.03 | (-0.18, 0.13) | 0.08 |  | 0.21 | (0.08, 0.35) | 0.07 |  |
|  | Other | 3.70 | (1.56, 5.85) | 1.09 |  | 2.54 | (-2.10, 7.18) | 2.37 |  | 0.98 | (-3.16, 5.13) | 2.11 |  |
| Religious affiliation | (Ref: Christianity) |  |  |  | 0.042 |  |  |  | 0.057 |  |  |  | 0.552 |
|  | Islam | 0.36 | (0.06, 0.66) | 0.15 |  | 0.36 | (0.07, 0.66) | 0.15 |  | -0.04 | (-0.32, 0.24) | 0.14 |  |
|  | Collapsed affiliations with prevalence<3% | 0.57 | (-0.39, 1.52) | 0.49 |  | 0.18 | (-0.84, 1.21) | 0.52 |  | -0.48 | (-1.35, 0.39) | 0.44 |  |
| Race/ethnicity | (Ref: Plurality group) |  |  |  | 0.672 |  |  |  | 0.429 |  |  |  | 0.050 |
|  | Non-plurality groups | 0.05 | (-0.20, 0.31) | 0.13 |  | -0.10 | (-0.35, 0.15) | 0.13 |  | 0.20 | (-0.00, 0.40) | 0.10 |  |

Table S12d. Sensitivity to unmeasured confounding of childhood predictors in Kenya

|  | | Life Evaluation | | Life Satisfaction | | Happiness | |
| --- | --- | --- | --- | --- | --- | --- | --- |
| Variable | Category | E-value for Estimate | E-value for 95% CI | E-value for Estimate | E-value for 95% CI | E-value for Estimate | E-value for 95% CI |
| Relationship with mother | (Ref: Very bad/somewhat bad) |  |  |  |  |  |  |
|  | Very good/somewhat good | 1.21 | 1.00 | 1.31 | 1.00 | 1.45 | 1.00 |
| Relationship with father | (Ref: Very bad/somewhat bad) |  |  |  |  |  |  |
|  | Very good/somewhat good | 1.34 | 1.00 | 1.35 | 1.00 | 1.39 | 1.00 |
| Parent marital status | (Ref: Parents married) |  |  |  |  |  |  |
|  | Divorced | 1.15 | 1.00 | 1.24 | 1.00 | 1.36 | 1.00 |
|  | Parents were never married | 1.27 | 1.00 | 1.57 | 1.29 | 1.56 | 1.22 |
|  | One or both parents had died | 1.50 | 1.09 | 1.39 | 1.00 | 1.54 | 1.13 |
| Subjective financial status of family growing up | (Ref: Got by) |  |  |  |  |  |  |
|  | Lived comfortably | 1.53 | 1.37 | 1.35 | 1.14 | 1.38 | 1.20 |
|  | Found it difficult | 1.23 | 1.00 | 1.39 | 1.21 | 1.20 | 1.00 |
|  | Found it very difficult | 1.24 | 1.00 | 1.30 | 1.00 | 1.11 | 1.00 |
| Abuse | (Ref: No) |  |  |  |  |  |  |
|  | Yes | 1.26 | 1.00 | 1.44 | 1.22 | 1.51 | 1.29 |
| Outsider growing up | (Ref: No) |  |  |  |  |  |  |
|  | Yes | 1.12 | 1.00 | 1.35 | 1.00 | 1.14 | 1.00 |
| Self-rated health growing up | (Ref: Good) |  |  |  |  |  |  |
|  | Excellent | 1.33 | 1.07 | 1.17 | 1.00 | 1.33 | 1.11 |
|  | Very good | 1.35 | 1.10 | 1.16 | 1.00 | 1.27 | 1.00 |
|  | Fair | 1.10 | 1.00 | 1.33 | 1.00 | 1.19 | 1.00 |
|  | Poor | 1.28 | 1.00 | 1.63 | 1.15 | 1.65 | 1.11 |
| Immigration status | (Ref: Born in this country) |  |  |  |  |  |  |
|  | Born in another country | 1.22 | 1.00 | 1.24 | 1.00 | 1.19 | 1.00 |
| Age 12 religious service attendance | (Ref: Never) |  |  |  |  |  |  |
|  | At least 1/week | 1.40 | 1.00 | 1.52 | 1.00 | 1.58 | 1.00 |
|  | 1-3/month | 1.53 | 1.00 | 1.58 | 1.00 | 1.58 | 1.00 |
|  | < 1/month | 1.56 | 1.00 | 2.05 | 1.43 | 1.57 | 1.00 |
| Year of birth | (Ref: 1998-2005; current age: 18-24) |  |  |  |  |  |  |
|  | 1993-1998; age 25-29 | 1.33 | 1.13 | 1.23 | 1.00 | 1.44 | 1.27 |
|  | 1983-1993; age 30-39 | 1.54 | 1.36 | 1.43 | 1.24 | 1.55 | 1.40 |
|  | 1973-1983; age 40-49 | 1.78 | 1.57 | 1.67 | 1.48 | 1.82 | 1.62 |
|  | 1963-1973; age 50-59 | 1.58 | 1.33 | 1.25 | 1.00 | 1.67 | 1.39 |
|  | 1953-1963; age 60-69 | 1.60 | 1.26 | 1.42 | 1.00 | 1.61 | 1.25 |
|  | 1943-1953; age 70-79 | 1.52 | 1.00 | 1.10 | 1.00 | 1.53 | 1.00 |
|  | 1943 or earlier; age 80+ | 1.72 | 1.00 | 1.61 | 1.00 | 1.14 | 1.00 |
| Gender | (Ref: Male) |  |  |  |  |  |  |
|  | Female | 1.11 | 1.00 | 1.09 | 1.00 | 1.34 | 1.18 |
|  | Other | 5.04 | 2.46 | 3.28 | 1.00 | 2.04 | 1.00 |
| Religious affiliation | (Ref: Christianity) |  |  |  |  |  |  |
|  | Islam | 1.44 | 1.15 | 1.43 | 1.15 | 1.12 | 1.00 |
|  | Collapsed affiliations with prevalence<3% | 1.62 | 1.00 | 1.27 | 1.00 | 1.59 | 1.00 |
| Race/ethnicity | (Ref: Plurality group) |  |  |  |  |  |  |
|  | Non-plurality groups | 1.14 | 1.00 | 1.19 | 1.00 | 1.32 | 1.00 |

Table S12e. Complete-case supplemental analysis of means by demographic category for Kenya

|  | | Life Evaluation | | | | Life Satisfaction | | | | Happiness | | | |
| --- | --- | --- | --- | --- | --- | --- | --- | --- | --- | --- | --- | --- | --- |
| Variable | Category | Mean | 95% CI | SE | Global p-value | Mean | 95% CI | SE | Global p-value | Mean | 95% CI | SE | Global p-value |
| Age group | 18-24 | 6.50 | (6.39,6.62) | 0.06 | < .001 | 7.23 | (7.11,7.36) | 0.06 | < .001 | 7.96 | (7.84,8.07) | 0.06 | < .001 |
|  | 25-29 | 6.30 | (6.15,6.46) | 0.08 |  | 7.01 | (6.85,7.16) | 0.08 |  | 7.70 | (7.56,7.85) | 0.07 |  |
|  | 30-39 | 6.19 | (6.03,6.34) | 0.08 |  | 6.92 | (6.78,7.06) | 0.07 |  | 7.66 | (7.55,7.78) | 0.06 |  |
|  | 40-49 | 5.97 | (5.76,6.18) | 0.11 |  | 6.68 | (6.48,6.88) | 0.10 |  | 7.42 | (7.22,7.61) | 0.10 |  |
|  | 50-59 | 6.13 | (5.85,6.41) | 0.14 |  | 7.03 | (6.78,7.29) | 0.13 |  | 7.60 | (7.37,7.83) | 0.12 |  |
|  | 60-69 | 6.35 | (5.99,6.71) | 0.18 |  | 7.55 | (7.21,7.90) | 0.18 |  | 7.70 | (7.40,8.01) | 0.15 |  |
|  | 70-79 | 6.41 | (5.85,6.97) | 0.28 |  | 7.12 | (6.56,7.68) | 0.28 |  | 7.70 | (7.15,8.24) | 0.28 |  |
|  | 80 or older | 6.87 | (5.53,8.20) | 0.67 |  | 7.92 | (6.81,9.04) | 0.56 |  | 8.14 | (6.92,9.35) | 0.61 |  |
| Gender | Female | 6.33 | (6.20,6.45) | 0.06 | 0.018 | 7.13 | (7.01,7.24) | 0.06 | < .001 | 7.84 | (7.74,7.95) | 0.05 | < .001 |
|  | Male | 6.22 | (6.10,6.34) | 0.06 |  | 6.96 | (6.85,7.08) | 0.06 |  | 7.57 | (7.47,7.67) | 0.05 |  |
|  | Other | 9.00 | (0.00,816.90) | 1.14 |  | 10.00 | (10.00,10.00) | 0.00 |  | 10.00 | (10.00,10.00) | 0.00 |  |
| Marital status | Divorced | 5.35 | (4.75,5.95) | 0.30 | 0.008 | 6.70 | (6.17,7.22) | 0.26 | 0.065 | 6.99 | (6.41,7.57) | 0.29 | 0.004 |
|  | Domestic partner | 6.22 | (5.65,6.79) | 0.29 |  | 6.68 | (6.18,7.18) | 0.25 |  | 7.54 | (7.02,8.06) | 0.26 |  |
|  | Married | 6.25 | (6.13,6.38) | 0.06 |  | 7.07 | (6.96,7.18) | 0.06 |  | 7.76 | (7.66,7.86) | 0.05 |  |
|  | Separated | 6.19 | (5.82,6.56) | 0.19 |  | 6.69 | (6.32,7.05) | 0.19 |  | 7.55 | (7.24,7.87) | 0.16 |  |
|  | Single/Never been married | 6.38 | (6.27,6.49) | 0.06 |  | 7.02 | (6.90,7.15) | 0.07 |  | 7.75 | (7.63,7.86) | 0.06 |  |
|  | Widowed | 6.04 | (5.59,6.49) | 0.23 |  | 7.39 | (7.00,7.78) | 0.20 |  | 7.07 | (6.64,7.51) | 0.22 |  |
| Employment | Employed for an employer | 6.21 | (6.01,6.40) | 0.10 | 0.022 | 6.71 | (6.54,6.88) | 0.09 | < .001 | 7.52 | (7.36,7.67) | 0.08 | < .001 |
|  | Homemaker | 6.45 | (6.24,6.67) | 0.11 |  | 7.45 | (7.24,7.66) | 0.11 |  | 8.01 | (7.82,8.19) | 0.09 |  |
|  | None of these/Other | 6.54 | (5.78,7.30) | 0.38 |  | 7.08 | (6.20,7.97) | 0.45 |  | 7.65 | (6.98,8.32) | 0.34 |  |
|  | Retired | 6.49 | (5.98,7.01) | 0.26 |  | 7.03 | (6.51,7.54) | 0.26 |  | 7.65 | (7.23,8.08) | 0.22 |  |
|  | Self-employed | 6.12 | (5.97,6.28) | 0.08 |  | 7.03 | (6.90,7.17) | 0.07 |  | 7.60 | (7.48,7.73) | 0.06 |  |
|  | Student | 6.44 | (6.27,6.61) | 0.09 |  | 7.08 | (6.90,7.25) | 0.09 |  | 7.79 | (7.63,7.95) | 0.08 |  |
|  | Unemployed and looking for a job | 6.30 | (6.16,6.44) | 0.07 |  | 7.01 | (6.87,7.16) | 0.07 |  | 7.76 | (7.63,7.89) | 0.07 |  |
| Religious service attendance | A few times a year | 6.03 | (5.79,6.27) | 0.12 | 0.020 | 6.78 | (6.55,7.02) | 0.12 | 0.004 | 7.23 | (7.01,7.44) | 0.11 | < .001 |
|  | More than once a week | 6.32 | (6.16,6.48) | 0.08 |  | 7.17 | (7.02,7.31) | 0.07 |  | 7.73 | (7.60,7.87) | 0.07 |  |
|  | Never | 6.48 | (6.08,6.89) | 0.21 |  | 6.93 | (6.56,7.29) | 0.19 |  | 7.55 | (7.22,7.89) | 0.17 |  |
|  | Once a week | 6.32 | (6.21,6.44) | 0.06 |  | 7.09 | (6.97,7.21) | 0.06 |  | 7.82 | (7.72,7.92) | 0.05 |  |
|  | One to three times a month | 6.04 | (5.83,6.25) | 0.11 |  | 6.80 | (6.61,6.99) | 0.10 |  | 7.50 | (7.33,7.67) | 0.09 |  |
| Education | Up to 8 years | 6.45 | (6.29,6.62) | 0.09 | < .001 | 7.39 | (7.24,7.54) | 0.08 | < .001 | 7.97 | (7.83,8.10) | 0.07 | < .001 |
|  | 16+ years | 5.85 | (5.61,6.09) | 0.12 |  | 6.27 | (6.04,6.50) | 0.12 |  | 6.99 | (6.78,7.21) | 0.11 |  |
|  | 9 to 15 years | 6.21 | (6.11,6.31) | 0.05 |  | 6.91 | (6.82,7.00) | 0.05 |  | 7.62 | (7.53,7.71) | 0.04 |  |
| Immigration status | Born in another country | 6.35 | (5.71,6.99) | 0.32 | 0.816 | 7.05 | (6.39,7.72) | 0.34 | 0.979 | 8.19 | (7.71,8.67) | 0.24 | 0.051 |
|  | Born in this country | 6.27 | (6.17,6.37) | 0.05 |  | 7.05 | (6.95,7.14) | 0.05 |  | 7.70 | (7.62,7.79) | 0.04 |  |
| Religious affiliation | Buddhism | 5.00 | * | * | < .001 | 6.00 | * | * | < .001 | 7.00 | * | * | < .001 |
|  | Christianity | 6.22 | (6.11,6.32) | 0.05 |  | 7.01 | (6.92,7.11) | 0.05 |  | 7.71 | (7.62,7.79) | 0.04 |  |
|  | Confucianism | 10.00 | * | * |  | 7.00 | * | * |  | 8.00 | * | * |  |
|  | Islam | 6.92 | (6.66,7.19) | 0.14 |  | 7.45 | (7.20,7.70) | 0.13 |  | 7.81 | (7.55,8.06) | 0.13 |  |
|  | Judaism | 4.50 | * | * |  | 10.00 | * | * |  | 5.84 | * | * |  |
|  | No religion/Atheist/Agnostic | 6.08 | (5.31,6.86) | 0.39 |  | 6.80 | (6.07,7.53) | 0.37 |  | 7.47 | (6.86,8.07) | 0.31 |  |
|  | Primal, Animist, or Folk religion | 5.65 | (3.36,7.95) | 1.15 |  | 4.50 | (2.05,6.96) | 1.23 |  | 5.53 | (3.13,7.92) | 1.20 |  |
|  | Some other religion | 6.57 | * | * |  | 7.88 | * | * |  | 8.21 | * | * |  |
|  | Baha’i | 10.00 | * | * |  | 10.00 | * | * |  | 10.00 | * | * |  |
|  | Jainism | 5.00 | * | * |  | 7.00 | * | * |  | 6.00 | * | * |  |

Table S12f. Complete-case supplemental analysis of childhood predictors regression analysis results for Kenya

|  | | Life Evaluation | | | | Life Satisfaction | | | | Happiness | | | |
| --- | --- | --- | --- | --- | --- | --- | --- | --- | --- | --- | --- | --- | --- |
| Variable | Category | Est | 95% CI | SE | Global p-value | Est | 95% CI | SE | Global p-value | Est | 95% CI | SE | Global p-value |
| Relationship with mother | (Ref: Very bad/somewhat bad) |  |  |  | 0.884 |  |  |  | 0.348 |  |  |  | 0.078 |
|  | Very good/somewhat good | -0.04 | (-0.52,0.45) | 0.25 |  | 0.22 | (-0.24,0.68) | 0.23 |  | 0.37 | (-0.04,0.78) | 0.21 |  |
| Relationship with father | (Ref: Very bad/somewhat bad) |  |  |  | 0.069 |  |  |  | 0.030 |  |  |  | 0.158 |
|  | Very good/somewhat good | 0.30 | (-0.02,0.61) | 0.16 |  | 0.36 | (0.04,0.68) | 0.16 |  | 0.19 | (-0.07,0.46) | 0.14 |  |
| Parent marital status | (Ref: Parents married) |  |  |  | 0.195 |  |  |  | 0.183 |  |  |  | 0.036 |
|  | No, one or both of them had died | -0.31 | (-0.75,0.13) | 0.22 |  | 0.00 | (-0.42,0.42) | 0.21 |  | -0.06 | (-0.41,0.29) | 0.18 |  |
|  | No, they were never married | 0.04 | (-0.40,0.48) | 0.22 |  | -0.13 | (-0.50,0.24) | 0.19 |  | -0.06 | (-0.40,0.27) | 0.17 |  |
|  | Yes, married | 0.09 | (-0.22,0.39) | 0.16 |  | 0.13 | (-0.12,0.39) | 0.13 |  | 0.22 | (-0.01,0.44) | 0.12 |  |
| Subjective financial status of family growing up | (Ref: Got by) |  |  |  | <.001 |  |  |  | <.001 |  |  |  | <.001 |
|  | Found it difficult | 0.21 | (0.04,0.38) | 0.09 |  | 0.19 | (0.03,0.35) | 0.08 |  | 0.20 | (0.05,0.34) | 0.07 |  |
|  | Found it very difficult | 0.30 | (-0.01,0.62) | 0.16 |  | 0.38 | (0.07,0.69) | 0.16 |  | 0.28 | (0.04,0.51) | 0.12 |  |
|  | Lived comfortably | 0.51 | (0.35,0.68) | 0.08 |  | 0.37 | (0.22,0.52) | 0.08 |  | 0.31 | (0.16,0.45) | 0.08 |  |
| Abuse | (Ref: No) |  |  |  | 0.426 |  |  |  | 0.091 |  |  |  | 0.193 |
|  | Yes | -0.09 | (-0.31,0.13) | 0.11 |  | -0.19 | (-0.41,0.03) | 0.11 |  | -0.12 | (-0.30,0.06) | 0.09 |  |
| Outsider growing up | (Ref: No) |  |  |  | 0.502 |  |  |  | 0.370 |  |  |  | 0.715 |
|  | Yes | 0.08 | (-0.15,0.31) | 0.12 |  | -0.11 | (-0.34,0.13) | 0.12 |  | 0.04 | (-0.17,0.25) | 0.11 |  |
| Self-rated health growing up | (Ref: Good) |  |  |  | 0.003 |  |  |  | <.001 |  |  |  | 0.004 |
|  | Excellent | 0.24 | (0.05,0.43) | 0.10 |  | 0.30 | (0.12,0.48) | 0.09 |  | 0.27 | (0.10,0.44) | 0.09 |  |
|  | Fair | -0.14 | (-0.39,0.12) | 0.13 |  | -0.20 | (-0.44,0.04) | 0.12 |  | -0.02 | (-0.24,0.20) | 0.11 |  |
|  | Poor | 0.11 | (-0.38,0.60) | 0.25 |  | 0.37 | (-0.10,0.84) | 0.24 |  | -0.04 | (-0.48,0.41) | 0.23 |  |
|  | Very good | 0.18 | (-0.01,0.38) | 0.10 |  | 0.18 | (-0.00,0.36) | 0.09 |  | 0.19 | (0.01,0.38) | 0.09 |  |
| Immigration status | (Ref: Born in this country) |  |  |  | 0.949 |  |  |  | 0.974 |  |  |  | 0.085 |
|  | Born in another country | -0.02 | (-0.65,0.61) | 0.32 |  | -0.01 | (-0.63,0.61) | 0.32 |  | 0.42 | (-0.06,0.90) | 0.25 |  |
| Age 12 religious service attendance | (Ref: Never) |  |  |  | 0.011 |  |  |  | 0.132 |  |  |  | 0.167 |
|  | At least once a week | 0.31 | (-0.30,0.92) | 0.31 |  | -0.37 | (-1.01,0.26) | 0.32 |  | -0.29 | (-0.83,0.24) | 0.27 |  |
|  | Less than once a month | 0.40 | (-0.35,1.15) | 0.38 |  | -0.60 | (-1.37,0.17) | 0.39 |  | -0.15 | (-0.77,0.47) | 0.32 |  |
|  | One to three times a month | 0.62 | (-0.02,1.25) | 0.33 |  | -0.20 | (-0.86,0.46) | 0.34 |  | -0.14 | (-0.71,0.42) | 0.29 |  |
| Year of birth | (Ref: 1998-2005; current age: 18-24) |  |  |  | 0.005 |  |  |  | <.001 |  |  |  | <.001 |
|  | 1993-1998; age 25-29 | -0.19 | (-0.36,-0.02) | 0.08 |  | -0.22 | (-0.39,-0.04) | 0.09 |  | -0.24 | (-0.41,-0.07) | 0.09 |  |
|  | 1983-1993; age 30-39 | -0.25 | (-0.41,-0.08) | 0.08 |  | -0.27 | (-0.44,-0.09) | 0.09 |  | -0.26 | (-0.41,-0.11) | 0.08 |  |
|  | 1973-1983; age 40-49 | -0.47 | (-0.70,-0.23) | 0.12 |  | -0.52 | (-0.74,-0.31) | 0.11 |  | -0.51 | (-0.71,-0.30) | 0.11 |  |
|  | 1963-1973; age 50-59 | -0.28 | (-0.57,0.00) | 0.15 |  | -0.16 | (-0.44,0.12) | 0.14 |  | -0.30 | (-0.55,-0.05) | 0.13 |  |
|  | 1953-1963; age 60-69 | -0.04 | (-0.42,0.33) | 0.19 |  | 0.36 | (-0.00,0.71) | 0.18 |  | -0.20 | (-0.50,0.10) | 0.15 |  |
|  | 1943-1953; age 70-79 | 0.03 | (-0.51,0.58) | 0.28 |  | -0.12 | (-0.67,0.43) | 0.28 |  | -0.23 | (-0.79,0.33) | 0.29 |  |
|  | 1943 or earlier; age 80+ | 0.40 | (-0.92,1.71) | 0.67 |  | 0.65 | (-0.44,1.73) | 0.55 |  | 0.27 | (-0.94,1.48) | 0.62 |  |
| Gender | (Ref: Male) |  |  |  | 0.002 |  |  |  | <.001 |  |  |  | <.001 |
|  | Male | -0.14 | (-0.29,0.00) | 0.08 |  | -0.19 | (-0.33,-0.05) | 0.07 |  | -0.29 | (-0.41,-0.18) | 0.06 |  |
|  | Other | 2.98 | (1.00,4.96) | 1.01 |  | 3.31 | (2.98,3.64) | 0.17 |  | 2.19 | (1.89,2.50) | 0.16 |  |
| Religious affiliation | (Ref: Christianity) |  |  |  | <.001 |  |  |  | 0.005 |  |  |  | 0.596 |
|  | Islam | 0.67 | (0.37,0.96) | 0.15 |  | 0.42 | (0.16,0.67) | 0.13 |  | 0.11 | (-0.13,0.36) | 0.13 |  |
|  | Collapsed affiliations with prevalence<3% | 0.60 | (-0.33,1.53) | 0.48 |  | 0.31 | (-0.64,1.26) | 0.48 |  | -0.19 | (-1.03,0.65) | 0.43 |  |
| Race/ethnicity | (Ref: Plurality group) |  |  |  | 0.094 |  |  |  | 0.230 |  |  |  | 0.017 |
|  | Non-plurality groups | 0.23 | (-0.04,0.50) | 0.14 |  | 0.14 | (-0.09,0.37) | 0.12 |  | 0.25 | (0.05,0.46) | 0.10 |  |

Table S12g. Sensitivity to unmeasured confounding of childhood predictors in Kenya

|  | | Life Evaluation | | Life Satisfaction | | Happiness | |
| --- | --- | --- | --- | --- | --- | --- | --- |
| Variable | Category | E-value for Estimate | E-value for 95% CI | E-value for Estimate | E-value for 95% CI | E-value for Estimate | E-value for 95% CI |
| Relationship with mother | (Ref: Very bad/somewhat bad) |  |  |  |  |  |  |
|  | Very good/somewhat good | 1.12 | 1.00 | 1.37 | 1.00 | 1.56 | 1.00 |
| Relationship with father | (Ref: Very bad/somewhat bad) |  |  |  |  |  |  |
|  | Very good/somewhat good | 1.44 | 1.00 | 1.52 | 1.13 | 1.36 | 1.00 |
| Parent marital status | (Ref: Parents married) |  |  |  |  |  |  |
|  | No, one or both of them had died | 1.46 | 1.00 | 1.02 | 1.00 | 1.18 | 1.00 |
|  | No, they were never married | 1.13 | 1.00 | 1.27 | 1.00 | 1.18 | 1.00 |
|  | Yes, married | 1.20 | 1.00 | 1.27 | 1.00 | 1.38 | 1.00 |
| Subjective financial status of family growing up | (Ref: Got by) |  |  |  |  |  |  |
|  | Found it difficult | 1.35 | 1.13 | 1.33 | 1.11 | 1.37 | 1.17 |
|  | Found it very difficult | 1.45 | 1.00 | 1.54 | 1.18 | 1.46 | 1.14 |
|  | Lived comfortably | 1.66 | 1.50 | 1.53 | 1.37 | 1.49 | 1.32 |
| Abuse | (Ref: No) |  |  |  |  |  |  |
|  | Yes | 1.21 | 1.00 | 1.34 | 1.00 | 1.26 | 1.00 |
| Outsider growing up | (Ref: No) |  |  |  |  |  |  |
|  | Yes | 1.19 | 1.00 | 1.24 | 1.00 | 1.14 | 1.00 |
| Self-rated health growing up | (Ref: Good) |  |  |  |  |  |  |
|  | Excellent | 1.39 | 1.15 | 1.46 | 1.25 | 1.45 | 1.24 |
|  | Fair | 1.27 | 1.00 | 1.34 | 1.00 | 1.10 | 1.00 |
|  | Poor | 1.24 | 1.00 | 1.53 | 1.00 | 1.14 | 1.00 |
|  | Very good | 1.32 | 1.00 | 1.32 | 1.00 | 1.36 | 1.06 |
| Immigration status | (Ref: Born in this country) |  |  |  |  |  |  |
|  | Born in another country | 1.09 | 1.00 | 1.06 | 1.00 | 1.62 | 1.00 |
| Age 12 religious service attendance | (Ref: Never) |  |  |  |  |  |  |
|  | At least once a week | 1.46 | 1.00 | 1.53 | 1.00 | 1.48 | 1.00 |
|  | Less than once a month | 1.55 | 1.00 | 1.76 | 1.00 | 1.30 | 1.00 |
|  | One to three times a month | 1.76 | 1.00 | 1.35 | 1.00 | 1.30 | 1.00 |
| Year of birth | (Ref: 1998-2005; current age: 18-24) |  |  |  |  |  |  |
|  | 1993-1998; age 25-29 | 1.33 | 1.10 | 1.37 | 1.13 | 1.41 | 1.19 |
|  | 1983-1993; age 30-39 | 1.39 | 1.20 | 1.42 | 1.21 | 1.44 | 1.25 |
|  | 1973-1983; age 40-49 | 1.61 | 1.38 | 1.68 | 1.46 | 1.71 | 1.48 |
|  | 1963-1973; age 50-59 | 1.43 | 1.00 | 1.30 | 1.00 | 1.48 | 1.15 |
|  | 1953-1963; age 60-69 | 1.14 | 1.00 | 1.51 | 1.00 | 1.36 | 1.00 |
|  | 1943-1953; age 70-79 | 1.12 | 1.00 | 1.25 | 1.00 | 1.40 | 1.00 |
|  | 1943 or earlier; age 80+ | 1.55 | 1.00 | 1.81 | 1.00 | 1.45 | 1.00 |
| Gender | (Ref: Male) |  |  |  |  |  |  |
|  | Male | 1.28 | 1.00 | 1.34 | 1.15 | 1.48 | 1.34 |
|  | Other | 4.85 | 2.14 | 5.72 | 5.04 | 3.96 | 3.46 |
| Religious affiliation | (Ref: Christianity) |  |  |  |  |  |  |
|  | Islam | 1.81 | 1.52 | 1.58 | 1.31 | 1.26 | 1.00 |
|  | Collapsed affiliations with prevalence<3% | 1.74 | 1.00 | 1.47 | 1.00 | 1.36 | 1.00 |
| Race/ethnicity | (Ref: Plurality group) |  |  |  |  |  |  |
|  | Non-plurality groups | 1.37 | 1.00 | 1.28 | 1.00 | 1.43 | 1.15 |

# Tables S13a-g: Mexico

Table S13a. Nationally representative descriptive statistics for Mexico

| **Characteristic** | **N = 5,776**1 |
| --- | --- |
| **Age group** |  |
| 1998-2005; age 18-24 | 986 (17%) |
| 1993-1998; age 25-29 | 623 (11%) |
| 1983-1993; age 30-39 | 1,312 (23%) |
| 1973-1983; age 40-49 | 1,027 (18%) |
| 1963-1973; age 50-59 | 873 (15%) |
| 1953-1963; age 60-69 | 611 (11%) |
| 1943-1953; age 70-79 | 277 (4.8%) |
| 1943 or earlier; age 80+ | 68 (1.2%) |
| (Missing) | 0 (0%) |
| **Gender** |  |
| Male | 2,755 (48%) |
| Female | 2,997 (52%) |
| Other | 3 (<0.1%) |
| (Missing) | 21 (0.4%) |
| **Race/Ethnicity** |  |
| Black | 108 (1.9%) |
| Indigenous | 594 (10%) |
| Mestizo | 2,762 (48%) |
| Mulatto | 63 (1.1%) |
| Other | 339 (5.9%) |
| White | 1,116 (19%) |
| (Missing) | 794 (14%) |
| **Respondent Marital status** |  |
| Married | 2,089 (36%) |
| Separated | 403 (7.0%) |
| Divorced | 230 (4.0%) |
| Widowed | 347 (6.0%) |
| Single, never married | 1,432 (25%) |
| Domestic Partner | 1,109 (19%) |
| (Missing) | 166 (2.9%) |
| **Employment** |  |
| Employed for an employer | 1,921 (33%) |
| Self-employed | 1,091 (19%) |
| Retired | 386 (6.7%) |
| Student | 247 (4.3%) |
| Homemaker | 1,257 (22%) |
| Unemployed and looking for a job | 564 (9.8%) |
| None of these/Other | 169 (2.9%) |
| (Missing) | 141 (2.4%) |
| **Religious service attendance as an adult (now)** |  |
| More than 1/week | 609 (11%) |
| 1/week | 1,261 (22%) |
| 1-3/month | 676 (12%) |
| A few times a year | 2,054 (36%) |
| Never | 1,134 (20%) |
| (Missing) | 43 (0.7%) |
| **Education (years)** |  |
| Up to 8 years | 1,291 (22%) |
| 9-15 years | 3,180 (55%) |
| 16+ years | 1,304 (23%) |
| (Missing) | 1 (<0.1%) |
| **Immigration status** |  |
| Born in this country | 5,517 (96%) |
| Born in another country | 108 (1.9%) |
| (Missing) | 151 (2.6%) |
| **Religious affiliation as an adult (now)** |  |
| Christianity | 4,844 (84%) |
| Islam | 2 (<0.1%) |
| Hinduism | 3 (<0.1%) |
| Buddhism | 6 (0.1%) |
| Judaism | 7 (0.1%) |
| Sikhism | 0 (0%) |
| Baha'i | 1 (<0.1%) |
| Jainism | 1 (<0.1%) |
| Shinto | 2 (<0.1%) |
| Taoism | 4 (<0.1%) |
| Confucianism | 1 (<0.1%) |
| Primal, Animist, or Folk religion | 20 (0.3%) |
| Spiritism | 0 (0%) |
| Umbanda, Candomble, and other African-derived religions | 0 (0%) |
| Chinese folk/traditional religion | 0 (0%) |
| Some other religion | 41 (0.7%) |
| No religion/Atheist/Agnostic | 770 (13%) |
| (Missing) | 75 (1.3%) |
| **Relationship with mother growing up** |  |
| Very good | 3,912 (68%) |
| Somewhat good | 1,340 (23%) |
| Somewhat bad | 177 (3.1%) |
| Very bad | 90 (1.6%) |
| Does not apply | 177 (3.1%) |
| (Missing) | 80 (1.4%) |
| **Relationship with father growing up** |  |
| Very good | 3,089 (53%) |
| Somewhat good | 1,556 (27%) |
| Somewhat bad | 335 (5.8%) |
| Very bad | 267 (4.6%) |
| Does not apply | 470 (8.1%) |
| (Missing) | 60 (1.0%) |
| **Parent marital status at age 12** |  |
| Parents married | 3,999 (69%) |
| Divorced | 341 (5.9%) |
| Parents were never married | 827 (14%) |
| One or both parents had died | 176 (3.0%) |
| (Missing) | 432 (7.5%) |
| **Subjective financial status of family growing up** |  |
| Lived comfortably | 1,775 (31%) |
| Got by | 1,872 (32%) |
| Found it difficult | 1,712 (30%) |
| Found it very difficult | 369 (6.4%) |
| (Missing) | 48 (0.8%) |
| **Abuse** |  |
| Yes | 905 (16%) |
| No | 4,604 (80%) |
| (Missing) | 267 (4.6%) |
| **Outsider growing up** |  |
| Yes | 772 (13%) |
| No | 4,897 (85%) |
| (Missing) | 107 (1.9%) |
| **Self-rated health growing up** |  |
| Excellent | 1,860 (32%) |
| Very good | 1,350 (23%) |
| Good | 1,677 (29%) |
| Fair | 743 (13%) |
| Poor | 133 (2.3%) |
| (Missing) | 14 (0.2%) |
| **Age 12 religious service attendance** |  |
| At least 1/week | 2,514 (44%) |
| 1-3/month | 1,162 (20%) |
| <1/month | 1,087 (19%) |
| Never | 944 (16%) |
| (Missing) | 69 (1.2%) |
| **Religious affiliation at age 12** |  |
| Christianity | 5,337 (92%) |
| Islam | 6 (<0.1%) |
| Hinduism | 1 (<0.1%) |
| Buddhism | 1 (<0.1%) |
| Judaism | 8 (0.1%) |
| Sikhism | 4 (<0.1%) |
| Baha'i | 1 (<0.1%) |
| Jainism | 0 (0%) |
| Shinto | 2 (<0.1%) |
| Taoism | 5 (<0.1%) |
| Confucianism | 0 (0%) |
| Primal, Animist, or Folk religion | 2 (<0.1%) |
| Spiritism | 0 (0%) |
| Umbanda, Candomble, and other African-derived religions | 0 (0%) |
| Chinese folk/traditional religion | 0 (0%) |
| Some other religion | 7 (0.1%) |
| No religion/Atheist/Agnostic | 328 (5.7%) |
| (Missing) | 74 (1.3%) |
| 1n (%) | |

Table S13b. Means by demographic category for Mexico

|  | | Life Evaluation | | | | Life Satisfaction | | | | Happiness | | | |
| --- | --- | --- | --- | --- | --- | --- | --- | --- | --- | --- | --- | --- | --- |
| Variable | Category | Mean | 95% CI | SE | Global p-value | Mean | 95% CI | SE | Global p-value | Mean | 95% CI | SE | Global p-value |
| Age group | 18-24 | 7.06 | (6.92,7.20) | 0.07 | 0.896 | 7.69 | (7.54,7.85) | 0.08 | 0.113 | 7.77 | (7.62,7.92) | 0.08 | 0.872 |
|  | 25-29 | 7.16 | (6.97,7.34) | 0.09 |  | 7.73 | (7.54,7.91) | 0.10 |  | 7.77 | (7.59,7.94) | 0.09 |  |
|  | 30-39 | 7.10 | (6.96,7.24) | 0.07 |  | 7.81 | (7.67,7.96) | 0.07 |  | 7.84 | (7.71,7.97) | 0.07 |  |
|  | 40-49 | 7.02 | (6.85,7.20) | 0.09 |  | 7.87 | (7.70,8.04) | 0.09 |  | 7.78 | (7.62,7.95) | 0.09 |  |
|  | 50-59 | 7.20 | (7.01,7.39) | 0.10 |  | 7.97 | (7.79,8.16) | 0.09 |  | 7.86 | (7.69,8.04) | 0.09 |  |
|  | 60-69 | 7.05 | (6.79,7.31) | 0.13 |  | 7.93 | (7.68,8.18) | 0.13 |  | 7.64 | (7.38,7.89) | 0.13 |  |
|  | 70-79 | 7.18 | (6.81,7.54) | 0.18 |  | 8.25 | (7.83,8.67) | 0.21 |  | 7.71 | (7.29,8.14) | 0.22 |  |
|  | 80 or older | 7.23 | (6.43,8.03) | 0.40 |  | 7.69 | (6.91,8.48) | 0.39 |  | 7.72 | (7.17,8.26) | 0.27 |  |
| Gender | Male | 7.12 | (7.01,7.22) | 0.05 | 0.790 | 7.91 | (7.80,8.02) | 0.06 | 0.099 | 7.80 | (7.69,7.90) | 0.05 | 0.260 |
|  | Female | 7.09 | (7.00,7.18) | 0.05 |  | 7.79 | (7.70,7.89) | 0.05 |  | 7.78 | (7.69,7.87) | 0.05 |  |
|  | Other | 7.46 | * | * |  | 6.36 | * | * |  | 6.56 | * | * |  |
| Marital status | Married | 7.34 | (7.23,7.46) | 0.06 | < .001 | 8.16 | (8.05,8.27) | 0.06 | < .001 | 7.99 | (7.88,8.10) | 0.06 | < .001 |
|  | Separated | 6.88 | (6.61,7.15) | 0.14 |  | 7.35 | (7.06,7.63) | 0.14 |  | 7.27 | (6.99,7.55) | 0.14 |  |
|  | Divorced | 7.02 | (6.64,7.40) | 0.19 |  | 7.49 | (7.10,7.88) | 0.20 |  | 7.64 | (7.29,8.00) | 0.18 |  |
|  | Widowed | 6.89 | (6.57,7.21) | 0.16 |  | 7.85 | (7.46,8.23) | 0.20 |  | 7.69 | (7.35,8.03) | 0.17 |  |
|  | Never | 7.00 | (6.88,7.13) | 0.06 |  | 7.50 | (7.36,7.65) | 0.08 |  | 7.53 | (7.39,7.66) | 0.07 |  |
|  | Domestic Partner | 6.94 | (6.78,7.10) | 0.08 |  | 7.97 | (7.82,8.11) | 0.07 |  | 7.98 | (7.85,8.11) | 0.07 |  |
| Employment | Employed for an employer | 7.25 | (7.14,7.37) | 0.06 | < .001 | 7.85 | (7.73,7.98) | 0.06 | < .001 | 7.84 | (7.73,7.96) | 0.06 | < .001 |
[truncated: 410,417 more chars]
